# Supplementary material for: Regioselective synthetic approach for key precursors of 6-arylbenzo[c]phenanthridin-10-ol derivatives: a useful compound for selective chromogenic recognition of fluoride
Source: Royal Society of Chemistry journal article supplement (doi:10.1039/d2ob01260j), 2022-01-01
Supplement: d2ob01260j1.pdf [file d2ob01260j1.pdf]

### Electronic Supporting Information

## Regioselective synthetic approach for key precursors of 6-arylbenzo[*c*]phenanthridin-10-ol derivatives: A useful compound for selective chromogenic recognition of fluoride<sup>†</sup>

Sabina Yashmin,<sup>a</sup> Santa Mondal,<sup>a</sup> Riyanka Das,<sup>b,c</sup> Priyabrata Banerjee,<sup>b,c</sup> and Abu Taleb Khan<sup>a\*</sup>

<sup>a</sup>Department of Chemistry, Indian Institute of Technology Guwahati, Guwahati-781 039, Assam, India, E-mail: [atk@iitg.ac.in](mailto:atk@iitg.ac.in)

<sup>b</sup>Surface Engineering & Tribology Group, CSIR-Central Mechanical Engineering Research Institute, Mahatma Gandhi Avenue, Durgapur, 713209, India. E-mail: [pr\\_banerjee@cmeri.res.in](mailto:pr_banerjee@cmeri.res.in), [priyabrata\\_banerjee@yahoo.co.in](mailto:priyabrata_banerjee@yahoo.co.in);

<sup>c</sup>Academy of Scientific & Innovative Research (AcSIR), Ghaziabad-201002, Uttar Pradesh, India

| Content                                                                                                                                                                                                                                 | Page No.  |
|-----------------------------------------------------------------------------------------------------------------------------------------------------------------------------------------------------------------------------------------|-----------|
| General Information and Methods                                                                                                                                                                                                         | S2        |
| Crystal data and structure refinement for compound <b>4t</b>                                                                                                                                                                            | S3-S4     |
| Optimization of reaction conditions                                                                                                                                                                                                     | S4        |
| Control experiments                                                                                                                                                                                                                     | S5        |
| A plausible mechanism for the synthesis of 6-arylbenzo[ <i>c</i> ]phenanthridin-10-ol and 6-arylphenanthridin-10-ol derivatives                                                                                                         | S5        |
| NMR and HRMS spectra of all the compounds                                                                                                                                                                                               | S6-S122   |
| HRMS Spectra of the reaction intermediates of compound <b>4l</b>                                                                                                                                                                        | S123-S126 |
| Stock solutions preparation                                                                                                                                                                                                             | S127      |
| Optical data of <b>4s</b> , <b>4x</b> , and <b>4u</b> in different organic solvents                                                                                                                                                     | S127      |
| Emission spectral changes of (a) <b>4s</b> , (b) <b>4x</b> , and (c) <b>4u</b> in different organic solvents                                                                                                                            | S127      |
| UV-Vis absorption spectral changes of (a) <b>4s</b> , (b) <b>4x</b> , and (c) <b>4u</b> in different organic solvents                                                                                                                   | S128      |
| (a) Selectivity of <b>4z</b> in presence of diverse anions; UV-Vis titration of (b) <b>4x</b> and (c) <b>4z</b> (100 μM in DMSO) in presence of 60 μL and 100 μL F <sup>-</sup> in 0.5 mM DMSO/H <sub>2</sub> O (v/v 7/3) respectively. | S129      |
| UV-Vis spectral data of (a) <b>4i</b> (100 μM in DMSO) (b) <b>4j</b> (100 μM in DMSO) in presence of F <sup>-</sup> in DMSO/H <sub>2</sub> O (v/v 7/3)                                                                                  | S129-130  |

|                                                                                                                                                                                                                                                                                                                                                                         |           |
|-------------------------------------------------------------------------------------------------------------------------------------------------------------------------------------------------------------------------------------------------------------------------------------------------------------------------------------------------------------------------|-----------|
| Calculation of LOD of (a) <b>4s</b> , (b) <b>4x</b> , (c) <b>4u</b> and (d) <b>4z</b> towards F <sup>-</sup> .                                                                                                                                                                                                                                                          | S130-S131 |
| Comparative literature survey of the recently reported F <sup>-</sup> specific chemosensors                                                                                                                                                                                                                                                                             | -S133     |
| Job's plot of <b>4s</b> with F <sup>-</sup> for the stoichiometry determination monitoring the change of absorbance at 460 nm                                                                                                                                                                                                                                           | S133      |
| B–H plot of (a) <b>4s</b> , (b) <b>4x</b> , (c) <b>4u</b> and (d) <b>4z</b> for the association constant determination towards F <sup>-</sup>                                                                                                                                                                                                                           | S134-S135 |
| UV-Vis spectral response of (a) <b>4s</b> , (b) <b>4x</b> and (c) <b>4u</b> (100 μM) in presence of different anions in 0.5 mM DMSO/H <sub>2</sub> O (v/v 7/3) at 460 nm and (d) UV-Vis spectral response of <b>4z</b> (100 μM) in presence of different anions in 0.5 mM DMSO/H <sub>2</sub> O (v/v 7/3).                                                              | S136-S137 |
| UV-Vis spectral response of (a) <b>4s</b> , (b) <b>4x</b> and (c) <b>4u</b> (100 μM) towards F <sup>-</sup> in the co-existence of different anions in 0.5 mM DMSO/H <sub>2</sub> O (v/v 7/3) at 460 nm and (d) UV-Vis spectral response of <b>4z</b> (100 μM) towards F <sup>-</sup> in the co-existence of different anions in 0.5 mM DMSO/H <sub>2</sub> O (v/v 7/3) | S138-S139 |
| UV-Vis spectral response of <b>4s</b> (100 μM, DMSO) towards F <sup>-</sup> (0.5 mM in DMSO/H <sub>2</sub> O (v/v 7/3)) as a function of exposure time                                                                                                                                                                                                                  | S140      |
| Cartesian coordinates of geometry optimized structure of <b>4s</b>                                                                                                                                                                                                                                                                                                      | S140-S142 |
| Cartesian coordinates of geometry optimized structure of <b>4s</b> with F <sup>-</sup>                                                                                                                                                                                                                                                                                  | S142-S144 |
| Cartesian coordinates of geometry optimized structure of <b>4u</b>                                                                                                                                                                                                                                                                                                      | S145-S146 |
| Cartesian coordinates of geometry optimized structure of <b>4u</b> with F <sup>-</sup>                                                                                                                                                                                                                                                                                  | S146-S148 |
| Reversibility of the sensory probes and proposition of logic circuitry                                                                                                                                                                                                                                                                                                  | S148-S149 |
| Naked eye solid state chromogenic recognition of F <sup>-</sup> by <b>4u</b> (left: only <b>4u</b> , right: <b>4u</b> in presence of F <sup>-</sup> )                                                                                                                                                                                                                   | S149      |
| References                                                                                                                                                                                                                                                                                                                                                              | S149-150  |

## General Information and Methods

Melting points were determined on a melting point apparatus and are uncorrected. <sup>1</sup>H and <sup>13</sup>C NMR spectra were recorded on 400, 500, and 600 MHz and 100, 125, and 150 MHz NMR spectrometers. TMS was used as an internal reference; chemical shifts (δ scale) are reported in parts per million (ppm). <sup>1</sup>H NMR spectra are reported in the order: multiplicity, coupling constant (J value) in hertz (Hz), and no. of protons; signals were characterized as s (singlet), d (doublet), t (triplet), m (multiplet), and bs (broad). IR spectra were recorded on an IR spectrophotometer. HRMS spectra were recorded using ESI and APCI (TOF) mode. The crystal structure was determined using a single crystal XRD diffractometer.

The anionic salts were procured from Sigma Aldrich and were used as obtained. The solvents were of analytical grade and were used without further purification. The UV-Vis spectroscopic studies were carried out in CARY 60 UV-Vis spectrophotometer in the wavelength range of 200-800 nm.

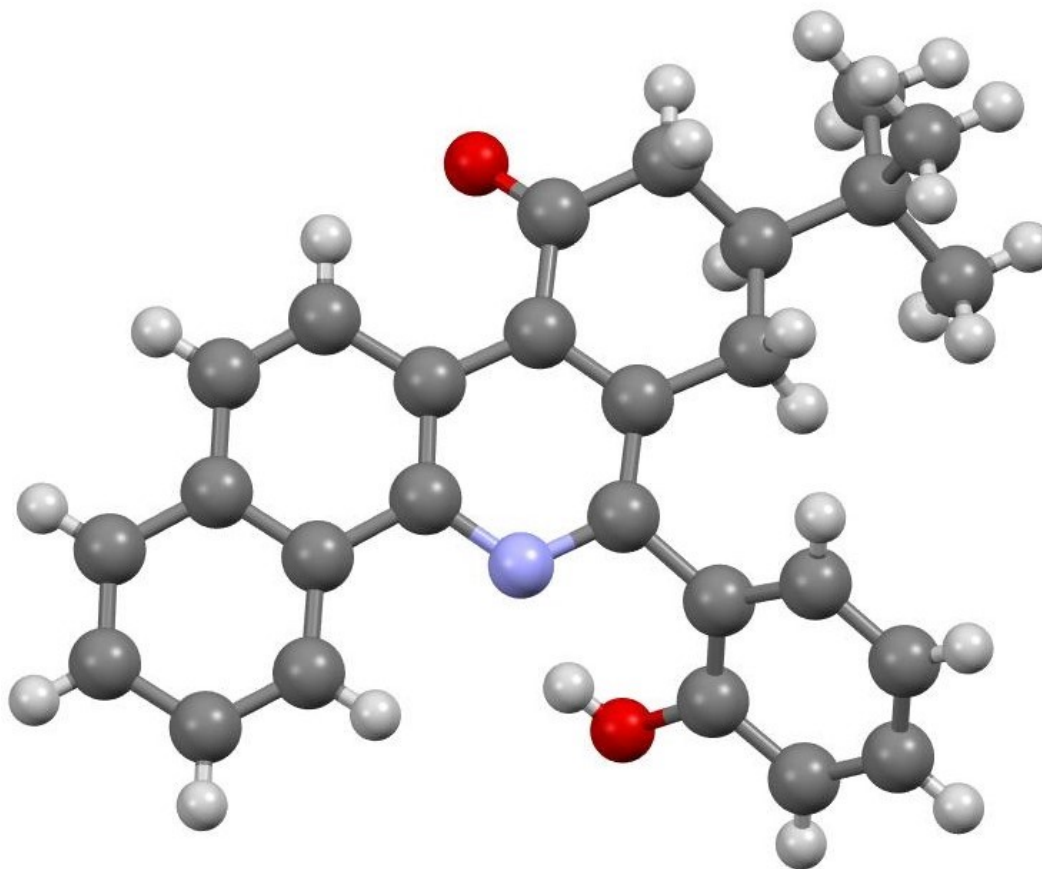

**Figure S1.** ORTEP Diagrams of compound **4t**.

**Table S1.** Crystal data and structure refinement for compound **4t**.

| Entry | Identification Code | Compound <b>4t</b>                               |
|-------|---------------------|--------------------------------------------------|
| 01    | Empirical formula   | $C_{27}H_{25}NO_2$                               |
| 02    | Formula weight      | 395.48                                           |
| 03    | Temperature         | 296 K                                            |
| 04    | Wavelength          | 0.71073                                          |
| 05    | Radiation type      | Mo K $\alpha$                                    |
| 06    | Radiation system    | Fine-focus sealed tube                           |
| 07    | Crystal system      | Monoclinic                                       |
| 08    | Space group         | P 21/c                                           |
| 09    | Cell length         | a 16.672(6)<br>b 11.449(4)<br>c 11.109(4)        |
| 10    | Cell angle          | $\alpha$ 90<br>$\beta$ 94.864(10)<br>$\gamma$ 90 |
| 11    | Cell volume         | 2112.7(12)                                       |

|    |                       |                                          |
|----|-----------------------|------------------------------------------|
| 12 | Density               | 1.243                                    |
| 13 | Completeness to theta | 99.7                                     |
| 14 | Absorption correction | multi-scan                               |
| 15 | Refinement method     | Full-matrix least-squares on F2          |
| 16 | Index ranges          | -19<=h<=19,<br>-13<=k<=13,<br>-13<=l<=13 |
| 17 | Reflection number     | 3640                                     |
| 18 | Theta range           | 24.829                                   |
| 19 | Cell formula units Z  | 4                                        |
| 20 | CCDC no               | 2060048                                  |

**Table S2.** Optimization of Reaction Conditions.<sup>a,b</sup>

Reaction scheme: 1-naphthylamine (**1**) + benzaldehyde (**2a**) + cyclohexanone (**3a**)  $\xrightarrow[\text{Temperature}]{\text{Catalyst, Solvent}}$  Indole derivative (**4a**) + Indole derivative (**4a'**)

| Entry     | Catalyst       | Mol%      | Solvent          | Temperature   | Time (h)   | %Yield <sup>b</sup> |                |
|-----------|----------------|-----------|------------------|---------------|------------|---------------------|----------------|
|           |                |           |                  |               |            | ( <b>4a</b> )       | ( <b>4a'</b> ) |
| 1.        | (±)-CSA        | 10        | DMSO             | 80 °C         | 15         | -                   | 20             |
| 2.        | (±)-CSA        | 10        | DMSO             | 100 °C        | 10         | 25                  | 10             |
| 3.        | (±)-CSA        | 10        | DMSO             | 120 °C        | 7          | 45                  | 05             |
| <b>4.</b> | <b>(±)-CSA</b> | <b>20</b> | <b>DMSO</b>      | <b>120 °C</b> | <b>2.5</b> | <b>65</b>           | <b>01</b>      |
| 5.        | (±)-CSA        | 30        | DMSO             | 120 °C        | 2.5        | 66                  | 01             |
| 6.        | (±)-CSA        | 20        | DMSO             | 130 °C        | 2.5        | 65                  | 01             |
| 7.        | <i>p</i> -TSA  | 20        | DMSO             | 120 °C        | 12         | 50                  | -              |
| 8.        | TFA            | 20        | DMSO             | 120 °C        | 24         | 12                  | -              |
| 9.        | TfOH           | 20        | DMSO             | 120 °C        | 24         | 20                  | -              |
| 10.       | Acetic acid    | 20        | DMSO             | 120 °C        | 12         | -                   | -              |
| 11.       | L-Proline      | 20        | DMSO             | 120 °C        | 12         | -                   | -              |
| 12.       | (±)-CSA        | 20        | H <sub>2</sub> O | 100 °C        | 24         | -                   | -              |
| 13.       | (±)-CSA        | 20        | DMF              | 120 °C        | 8          | 40                  | -              |

<sup>a</sup>All reactions were carried out with 1-naphthylamine **1** (0.143 g, 1 mmol), benzaldehyde **2a** (0.106 g, 1 mmol), and cyclohexanone **3a** (0.098 g, 1 mmol) in 1 mL of solvent at different temperatures mentioned above. <sup>b</sup>Yield of the isolated product.

## Control Experiment

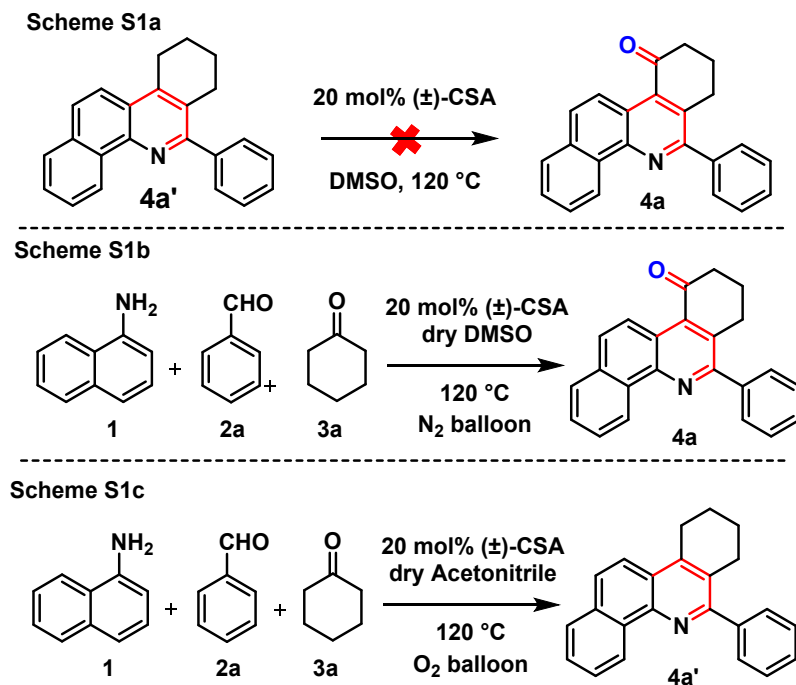

**Scheme S1.** Control experiment to establish reaction mechanism for the formation of **4** or **6**.

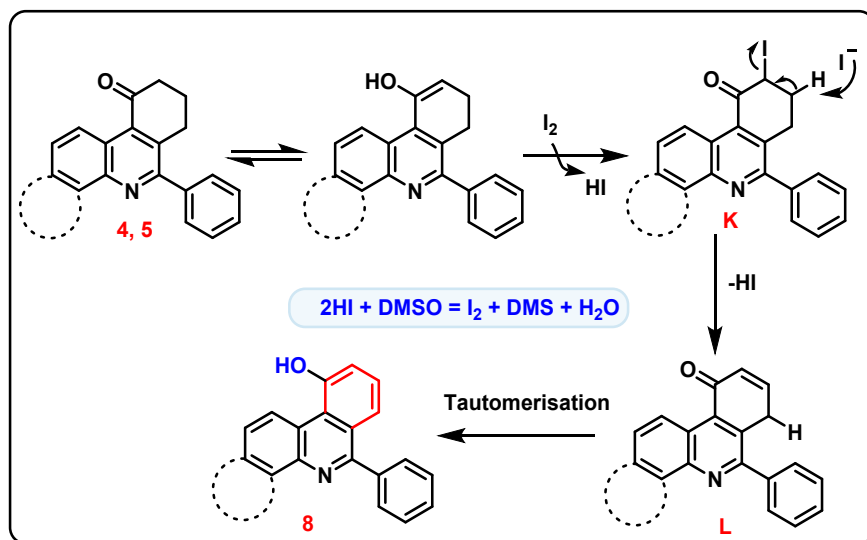

# <sup>1</sup>H NMR Spectrum of Compound 4a

ATK-Sy-P5-1H - 1H -

9.35  
9.34  
9.34  
9.33  
9.07  
9.06  
7.94  
7.93  
7.92  
7.91  
7.91  
7.90  
7.76  
7.74  
7.70  
7.69  
7.69  
7.68  
7.57  
7.56  
7.55  
7.52  
7.51  
7.50  
7.26

3.14  
3.13  
3.12  
2.89  
2.87  
2.86  
2.14  
2.13  
2.12  
2.11  
2.10

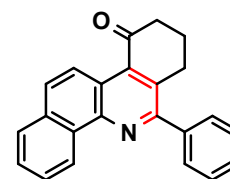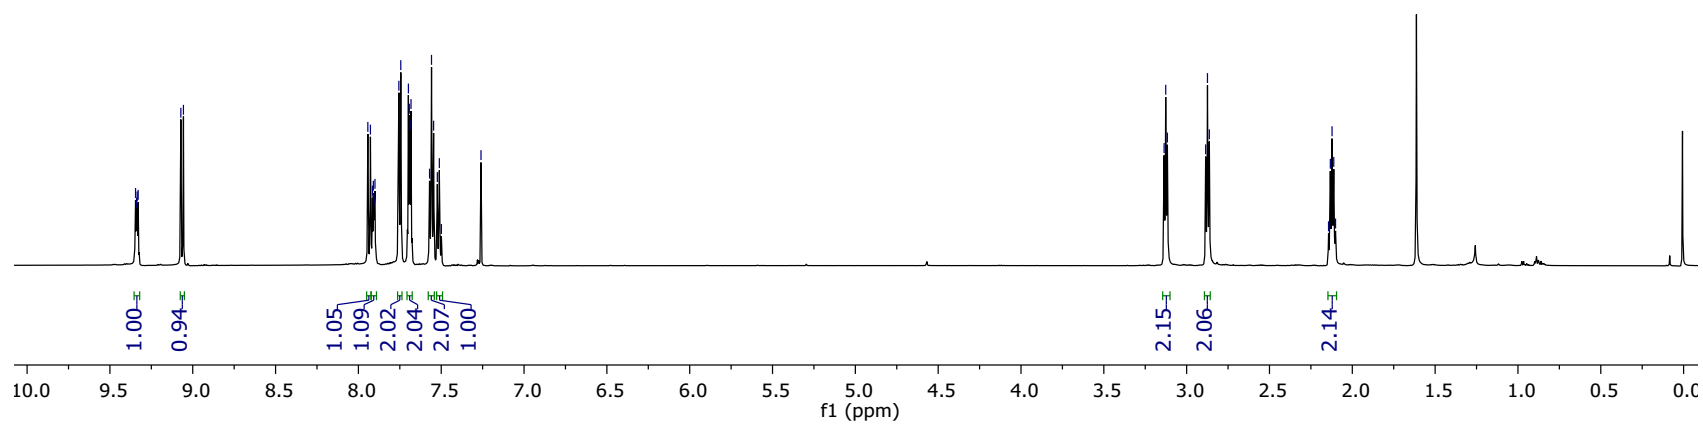

# <sup>13</sup>C NMR Spectrum of Compound 4a

ATK-SY-P5-13C — ATK-SY-P5-13C —

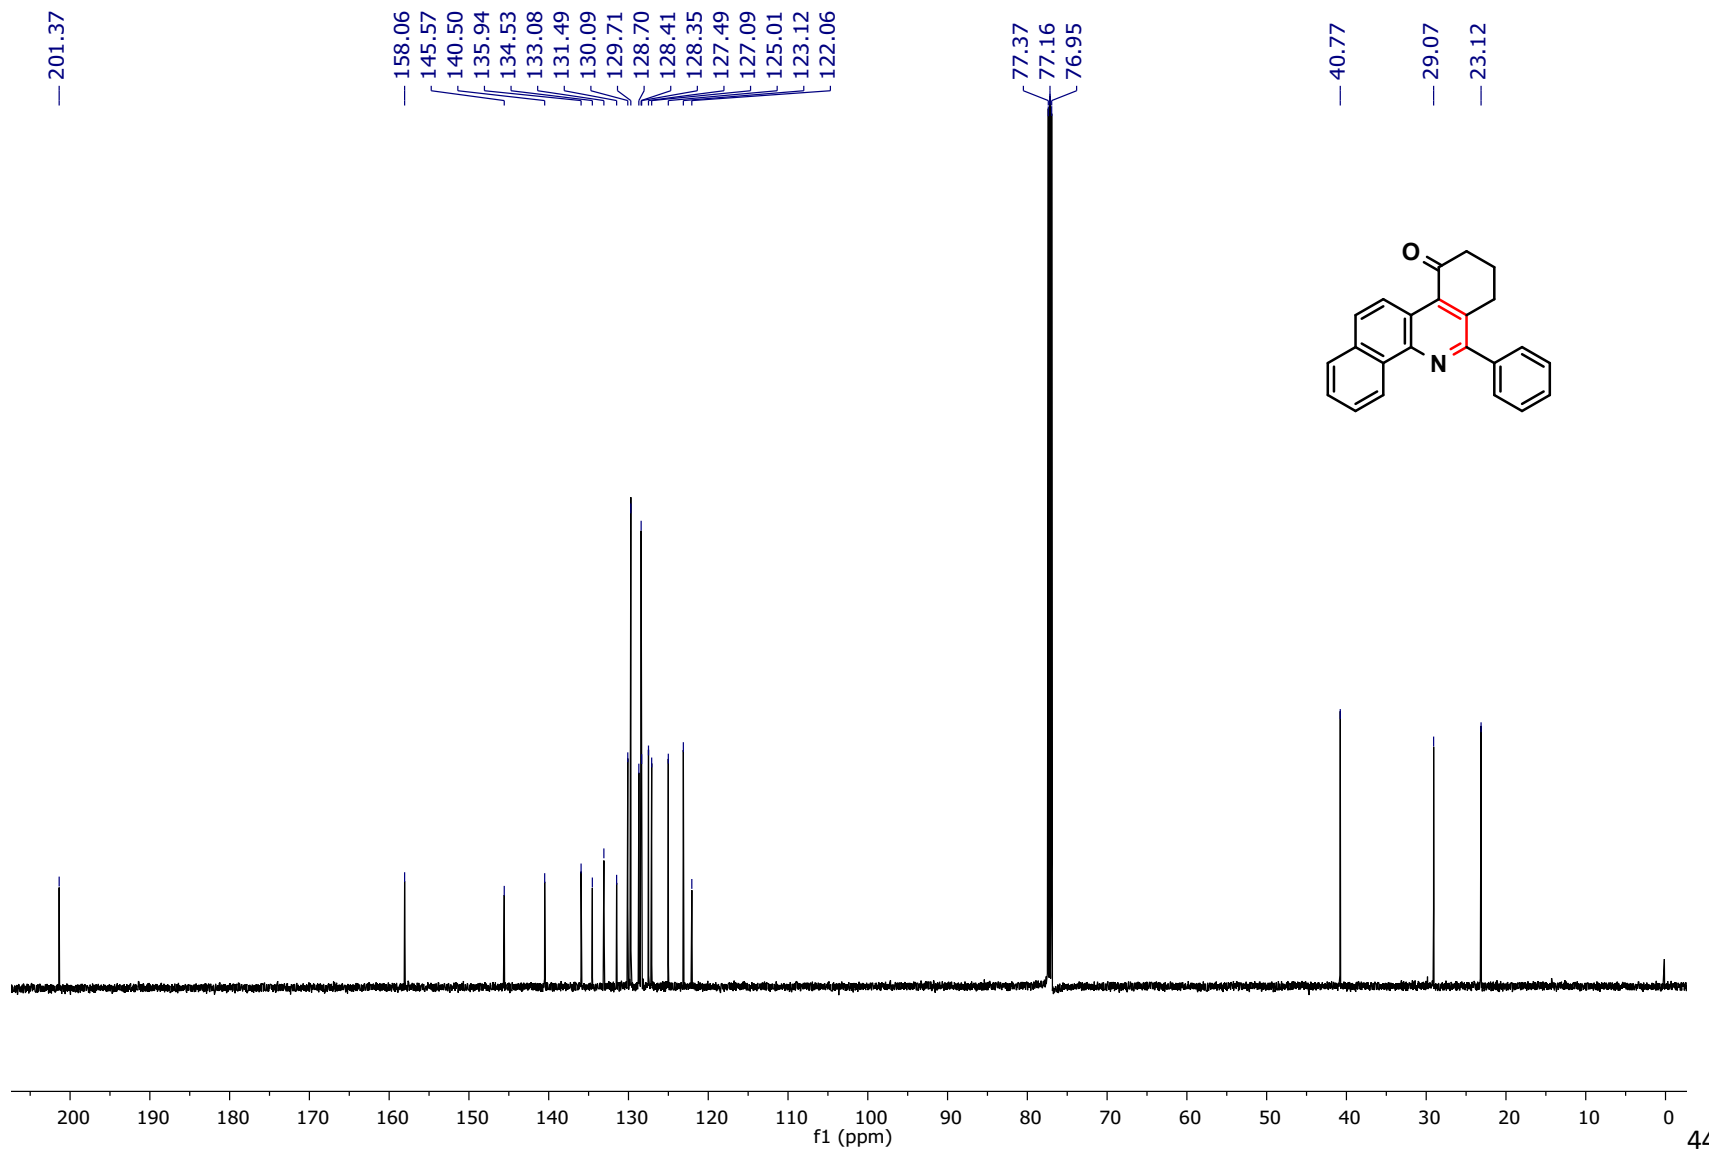

## HRMS Spectrum of compound 4a

|                    |                   |                               |         |                        |                                 |
|--------------------|-------------------|-------------------------------|---------|------------------------|---------------------------------|
| <b>Sample Name</b> | SAMPLE 26         | <b>Position</b>               | P2-C6   | <b>Instrument Name</b> | Instrument 1                    |
| <b>User Name</b>   |                   | <b>Inj Vol</b>                | 20      | <b>InjPosition</b>     |                                 |
| <b>Sample Type</b> | Sample            | <b>IRM Calibration Status</b> | Success | <b>Data Filename</b>   | ATK-SY-P5A.d                    |
| <b>ACQ Method</b>  | ESI ALS 100-600.m | <b>Comment</b>                |         | <b>Acquired Time</b>   | 28-12-2020 21:57:45 (UTC+05:30) |

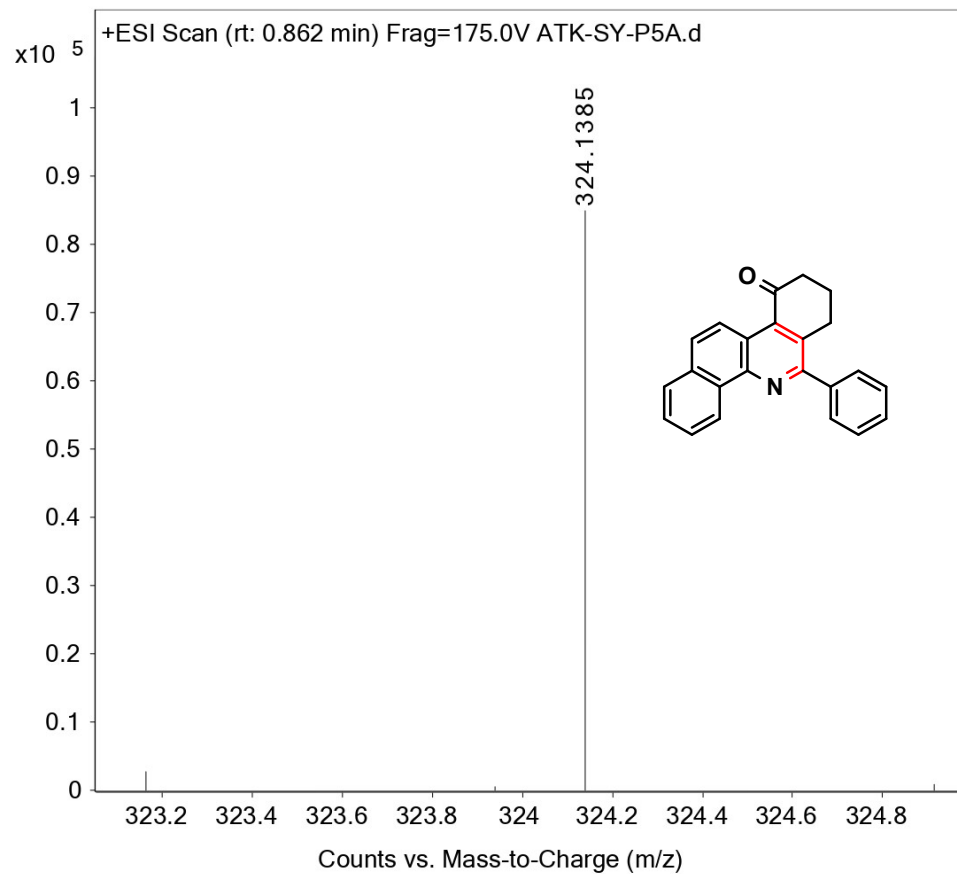



# <sup>1</sup>H NMR Spectrum of Compound 4b

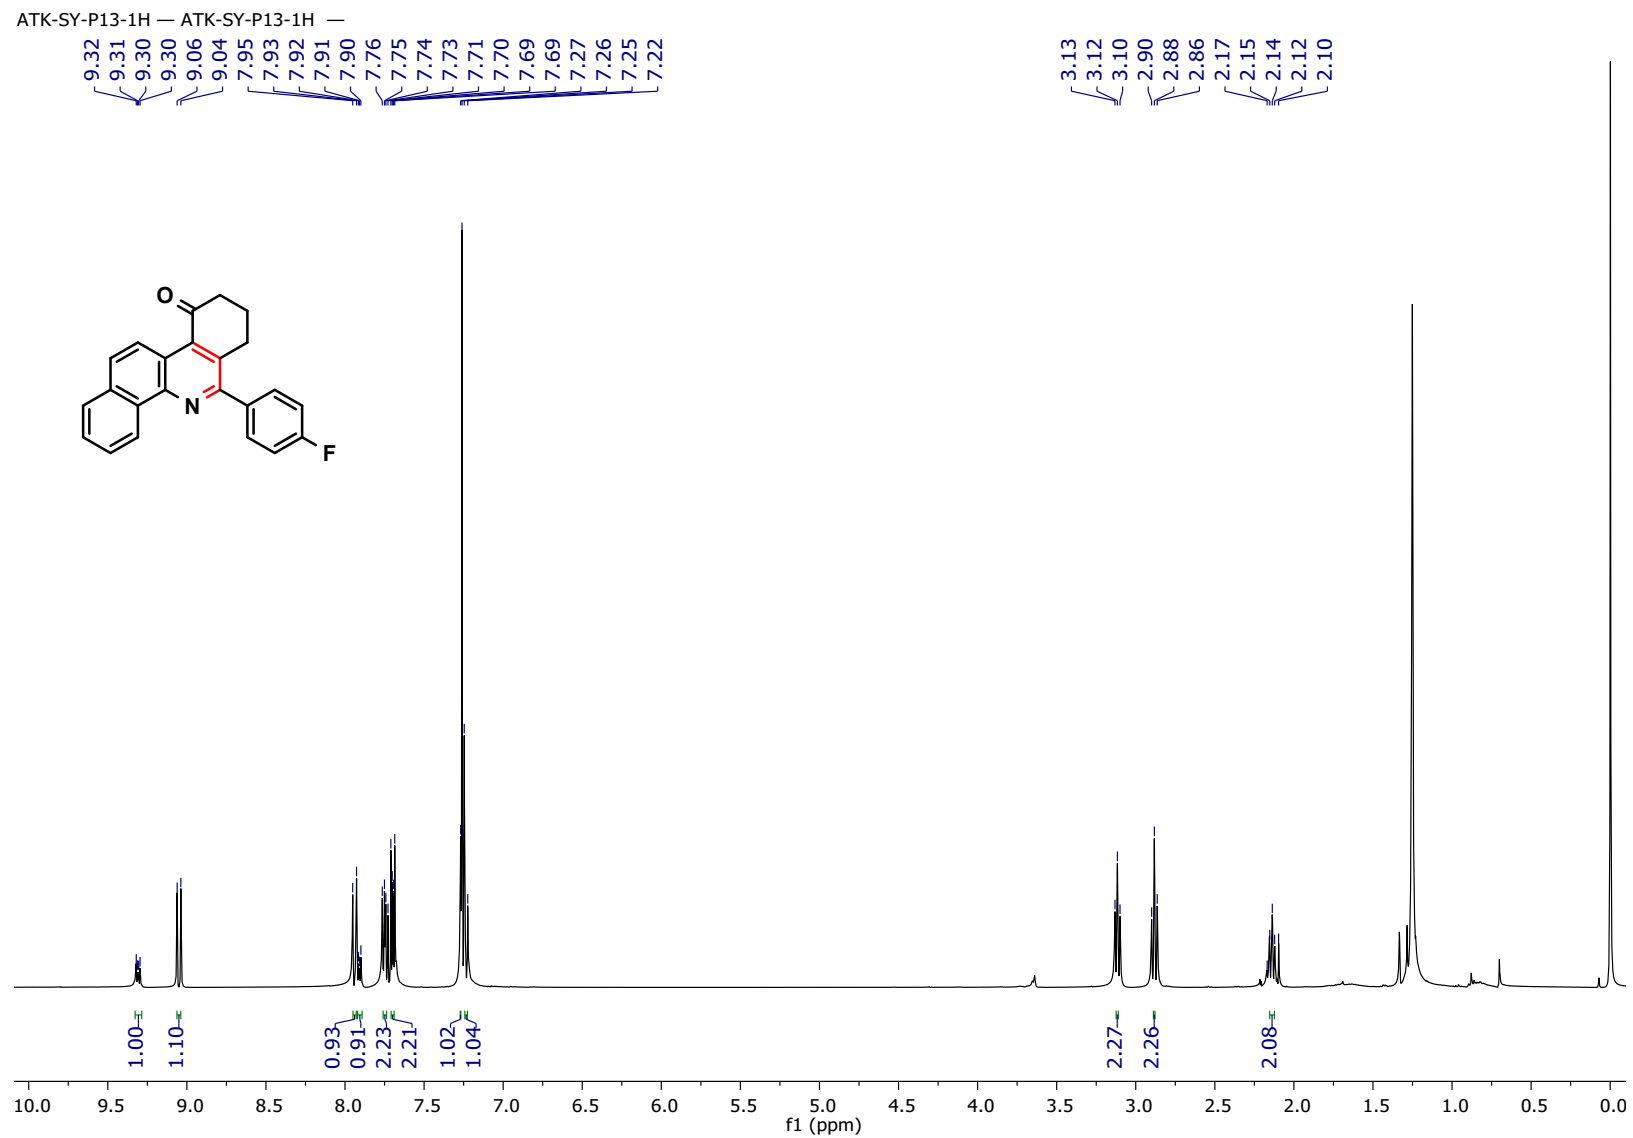

# <sup>13</sup>C NMR Spectrum of Compound 4b

ATK-SY-P13-13C — ATK-SY-P13-13C —

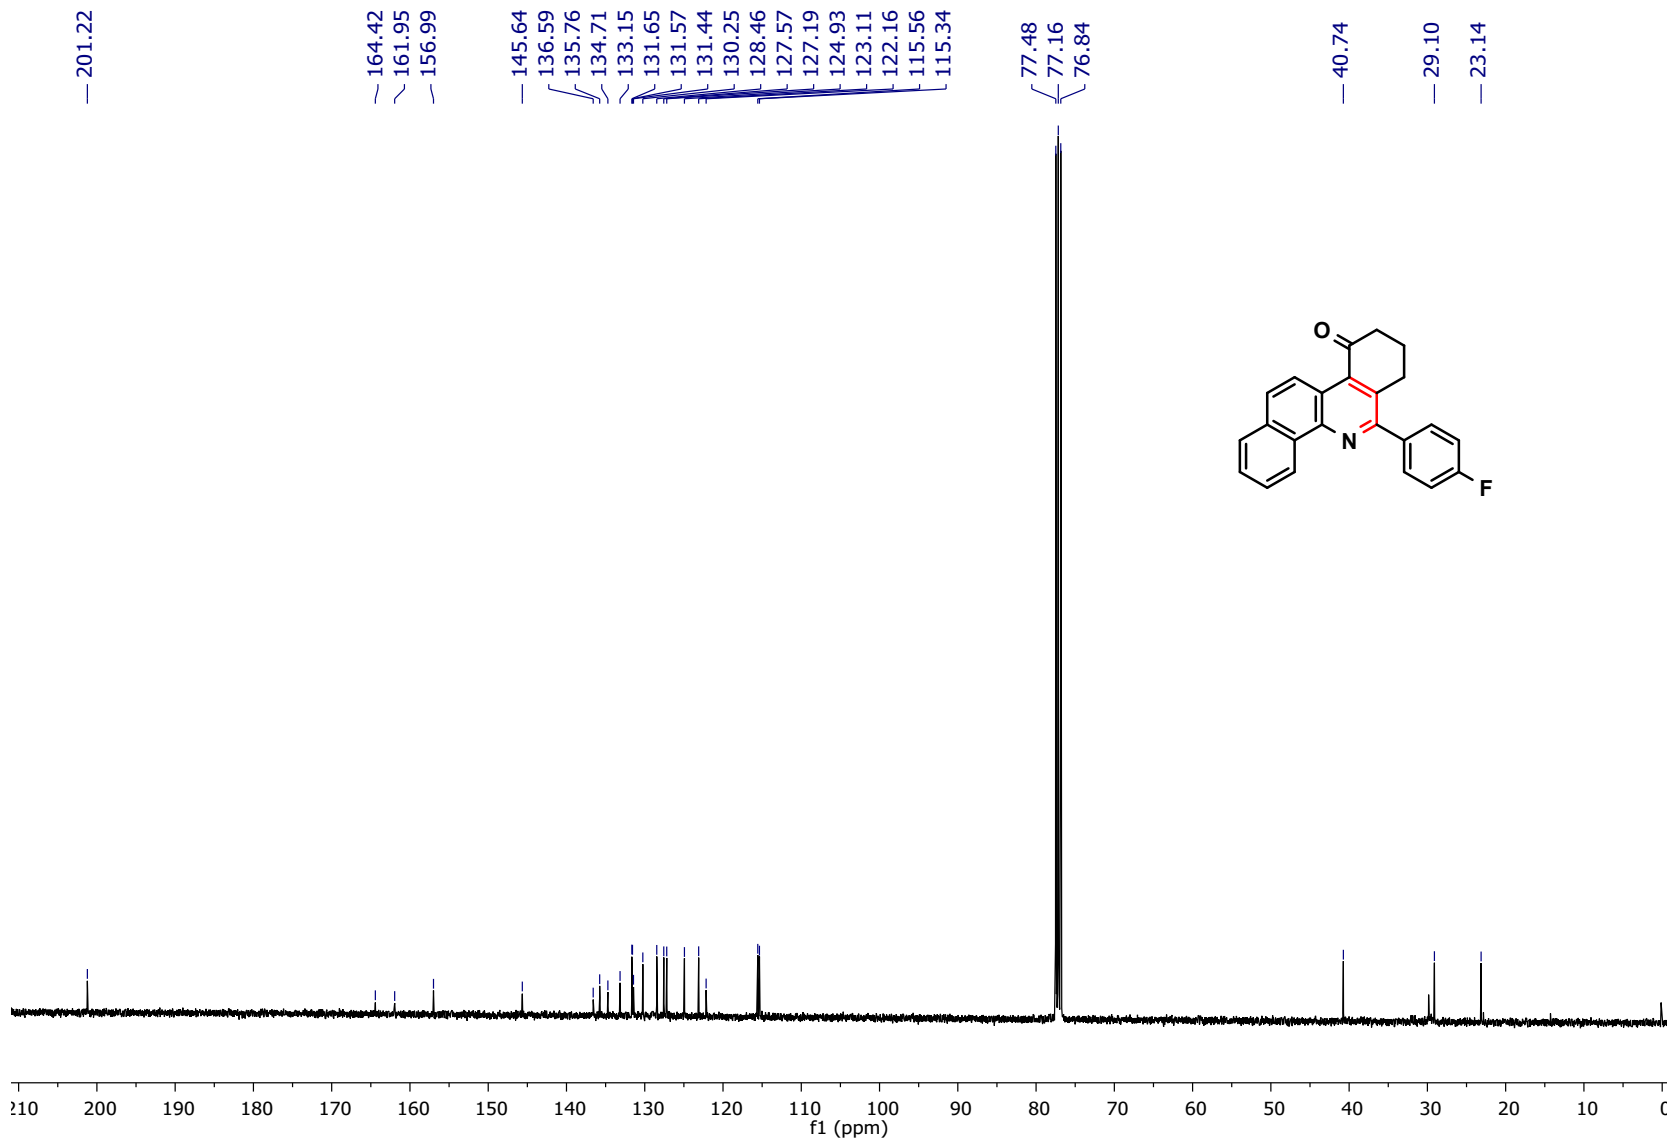

## HRMS Spectrum of Compound 4b

|             |                    |                        |         |                 |                                 |
|-------------|--------------------|------------------------|---------|-----------------|---------------------------------|
| Sample Name | SAMPLE             | Position               | P1-A10  | Instrument Name | Instrument 1                    |
| User Name   |                    | Inj Vol                | 20      | InjPosition     |                                 |
| Sample Type | Sample             | IRM Calibration Status | Success | Data Filename   | ATK-SY-P13.d                    |
| ACQ Method  | ESI ALS 100-1000.m | Comment                |         | Acquired Time   | 29-01-2021 18:04:12 (UTC+05:30) |

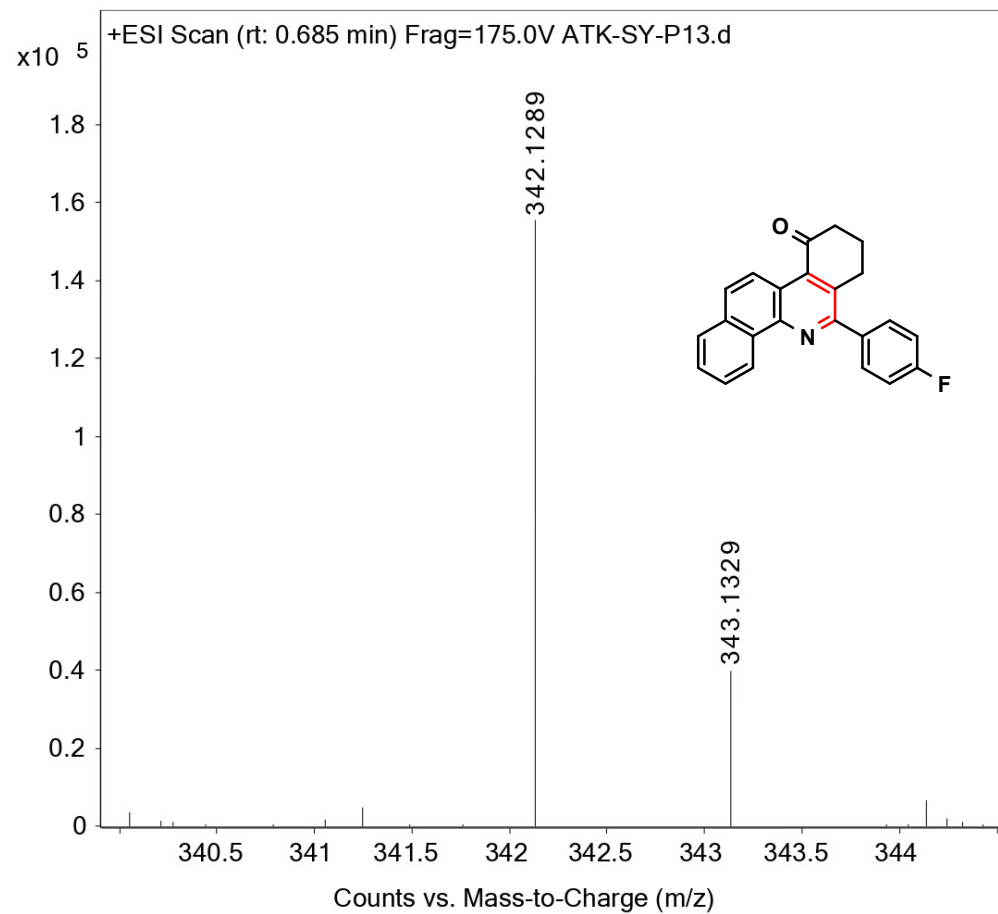

# <sup>1</sup>H NMR Spectrum of Compound 4c

ATK-SY-P9-1H — ATK-SY-P9-1H —

9.31  
9.30  
9.29  
9.28  
9.06  
9.04  
7.95  
7.93  
7.91  
7.90  
7.90  
7.71  
7.70  
7.69  
7.68  
7.54  
7.52  
7.26

3.12  
3.10  
3.09  
2.89  
2.87  
2.85  
2.16  
2.14  
2.13  
2.11  
2.10

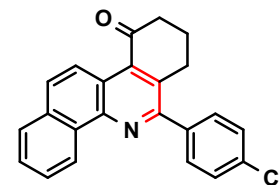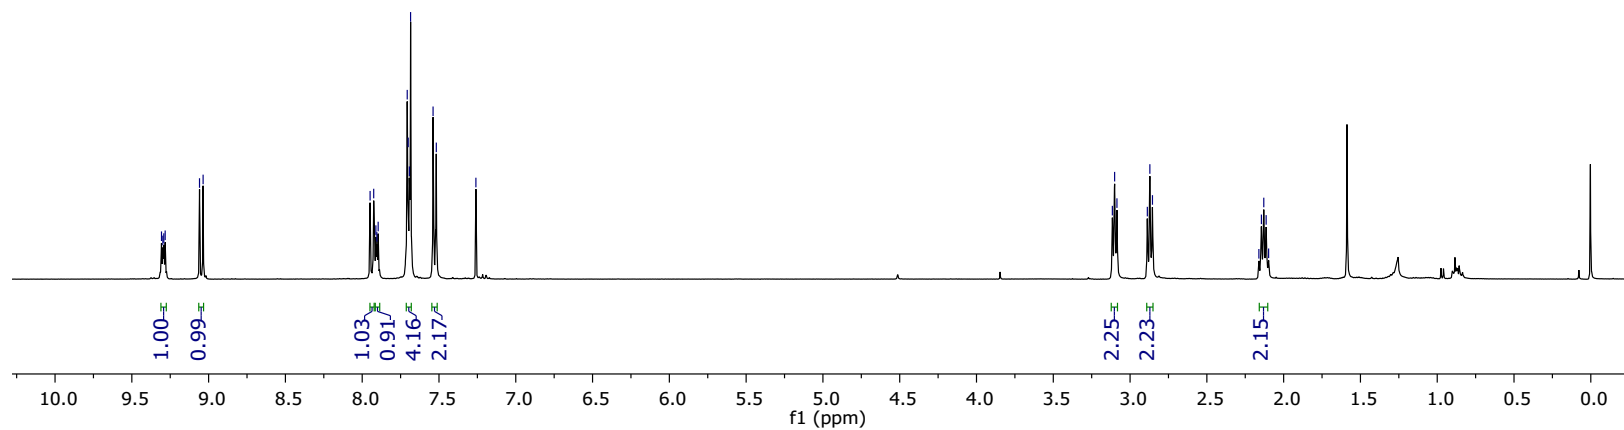

### <sup>13</sup>C NMR Spectrum of Compound 4c

ATK-SY-Q8-19  
13C

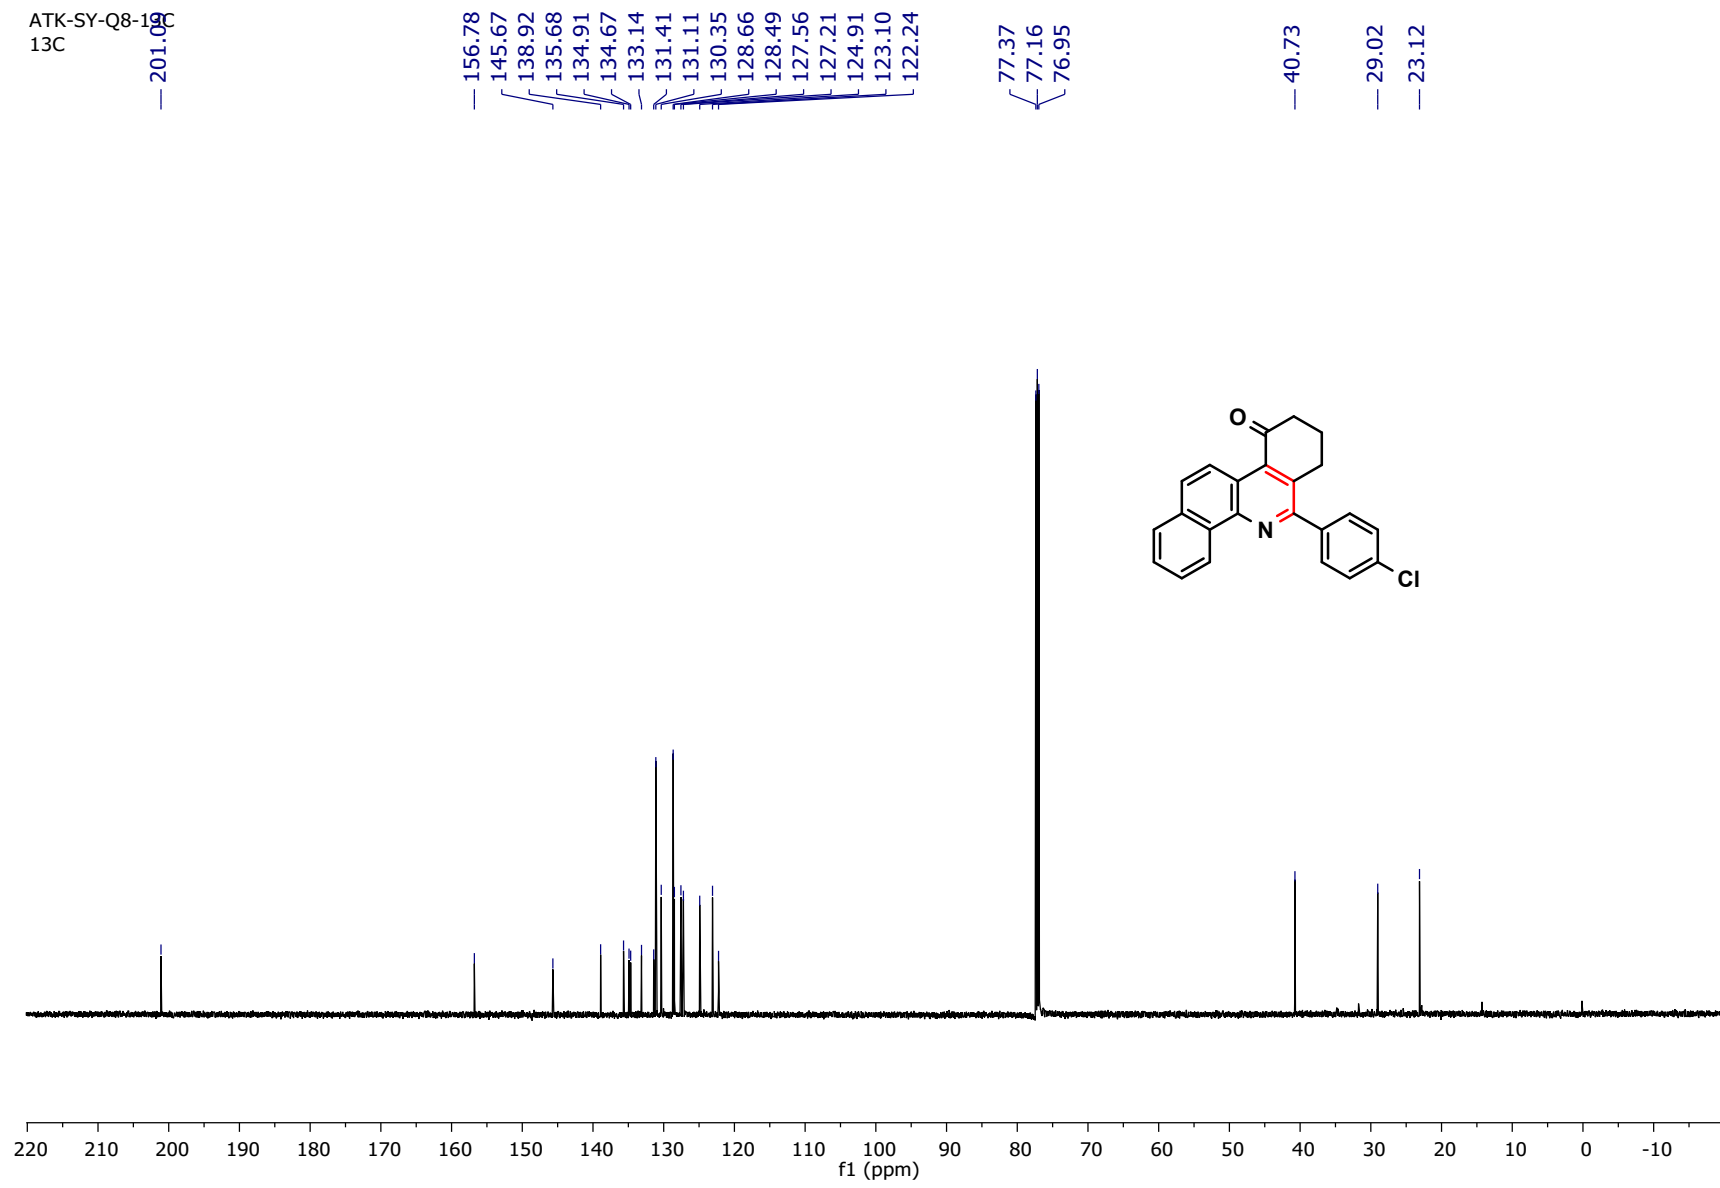

## HRMS Spectrum of Compound 4c

|             |                   |                        |         |                 |                                 |
|-------------|-------------------|------------------------|---------|-----------------|---------------------------------|
| Sample Name | SY-P9             | Position               | P2-B7   | Instrument Name | Instrument 1                    |
| User Name   |                   | Inj Vol                | 20      | InjPosition     |                                 |
| Sample Type | Sample            | IRM Calibration Status | Success | Data Filename   | SY-P9.d                         |
| ACQ Method  | ESI ALS 100-600.m | Comment                |         | Acquired Time   | 29-12-2020 20:29:31 (UTC+05:30) |

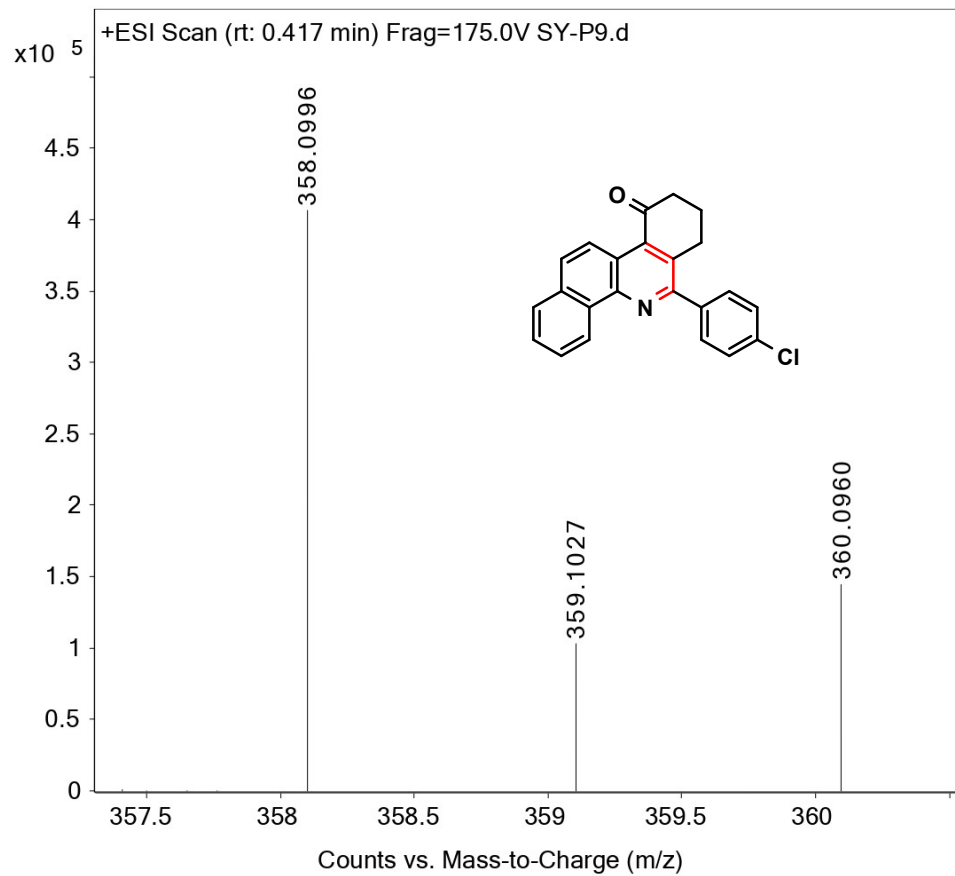

# <sup>1</sup>H NMR Spectrum of Compound 4d

ATK-SY-P11-1H — ATK-SY-P11-1H —

9.30  
9.29  
9.28  
9.06  
9.03  
7.95  
7.93  
7.91  
7.90  
7.89  
7.72  
7.71  
7.70  
7.69  
7.68  
7.68  
7.64  
7.62  
7.26

3.11  
3.10  
3.08  
2.89  
2.87  
2.85  
2.16  
2.14  
2.13  
2.11  
2.10

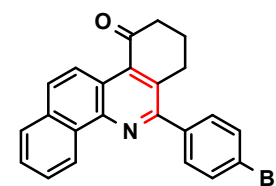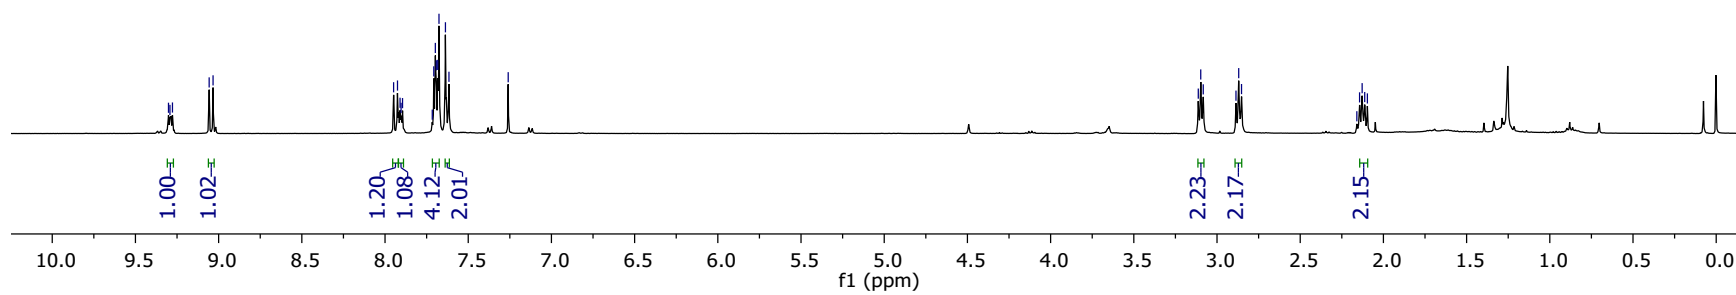

# <sup>13</sup>C NMR Spectrum of Compound 4d

ATK-SY-P11-13C — ATK-SY-P11-13C —

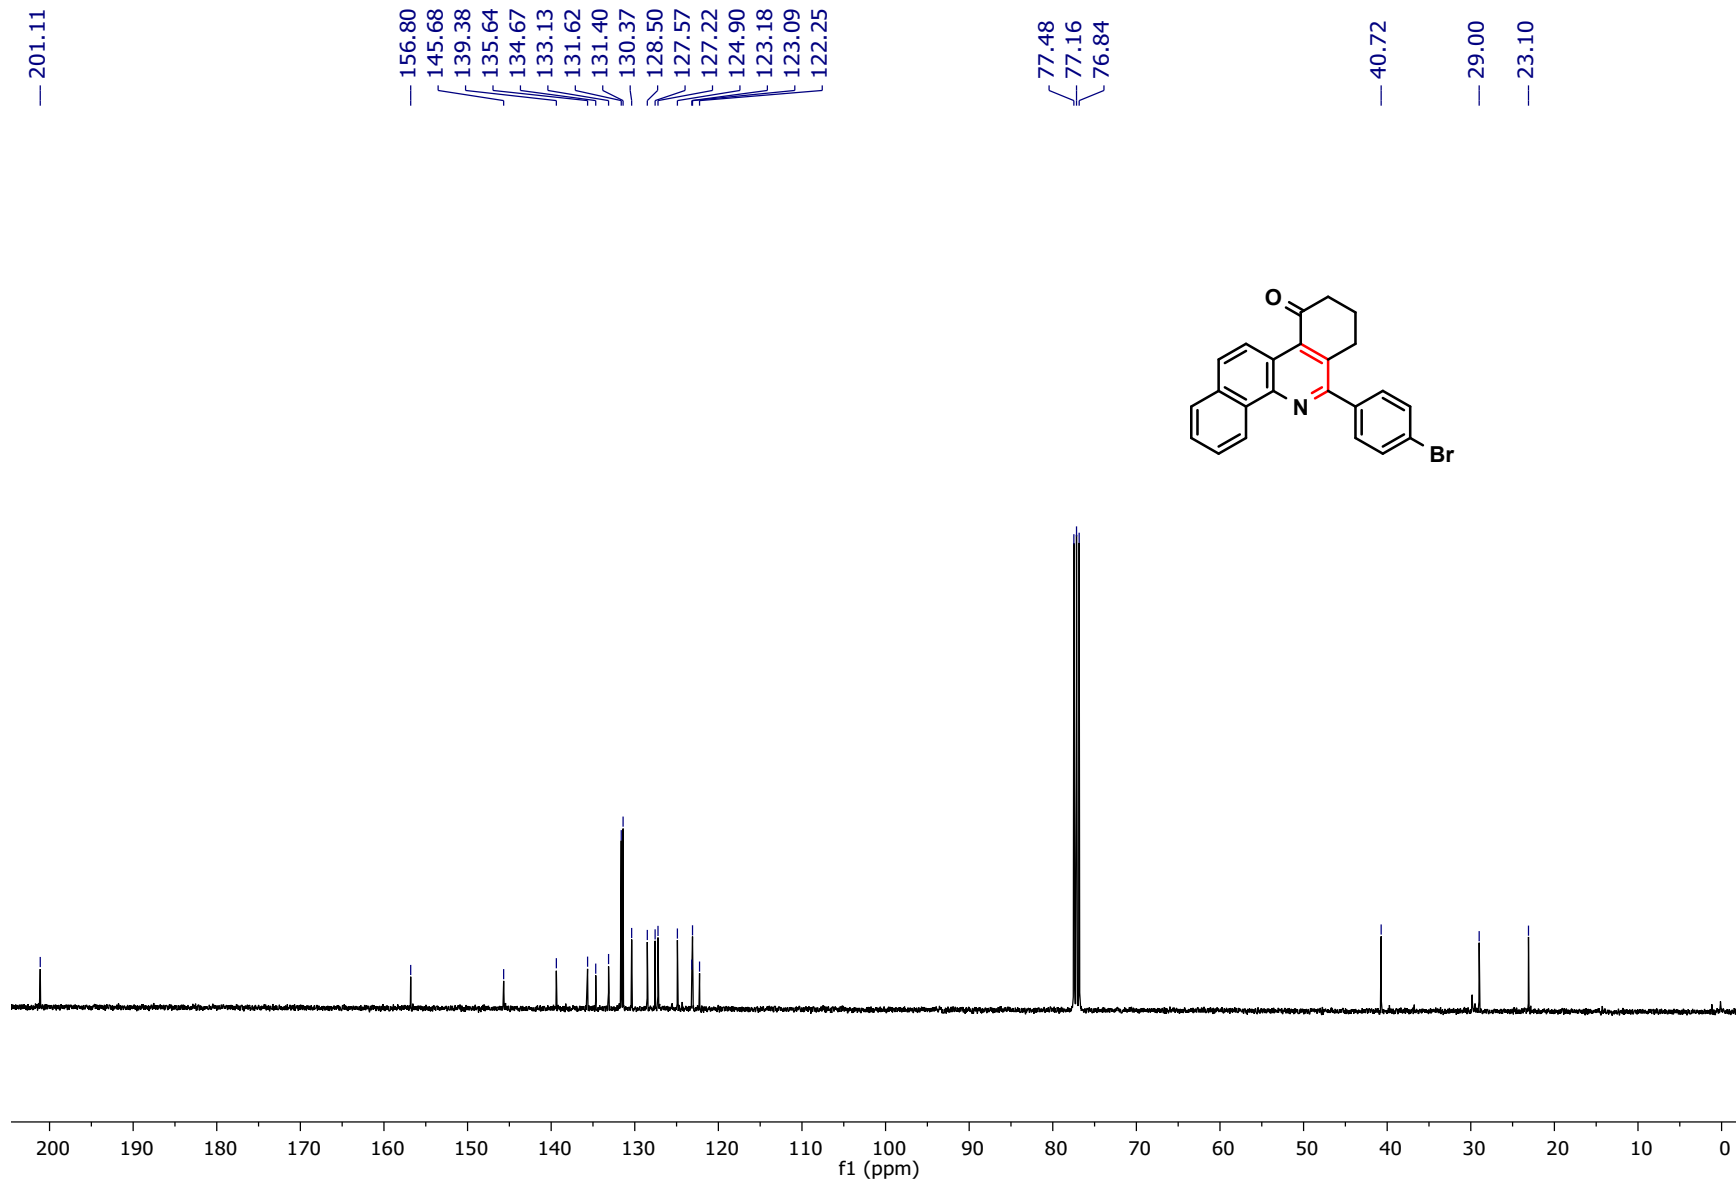



## HRMS Spectrum of Compound 4d

Sample Name  
User Name  
Sample Type  
ACQ Method

SY-P11  
Sample  
ESI ALS 100-600.m

Position P2-B9  
Inj Vol 20  
IRM Calibration Status Success  
Comment

Instrument Name Instrument 1  
InjPosition  
Data Filename SY-P11.d  
Acquired Time 29-12-2020 20:50:40 (UTC+05:30)

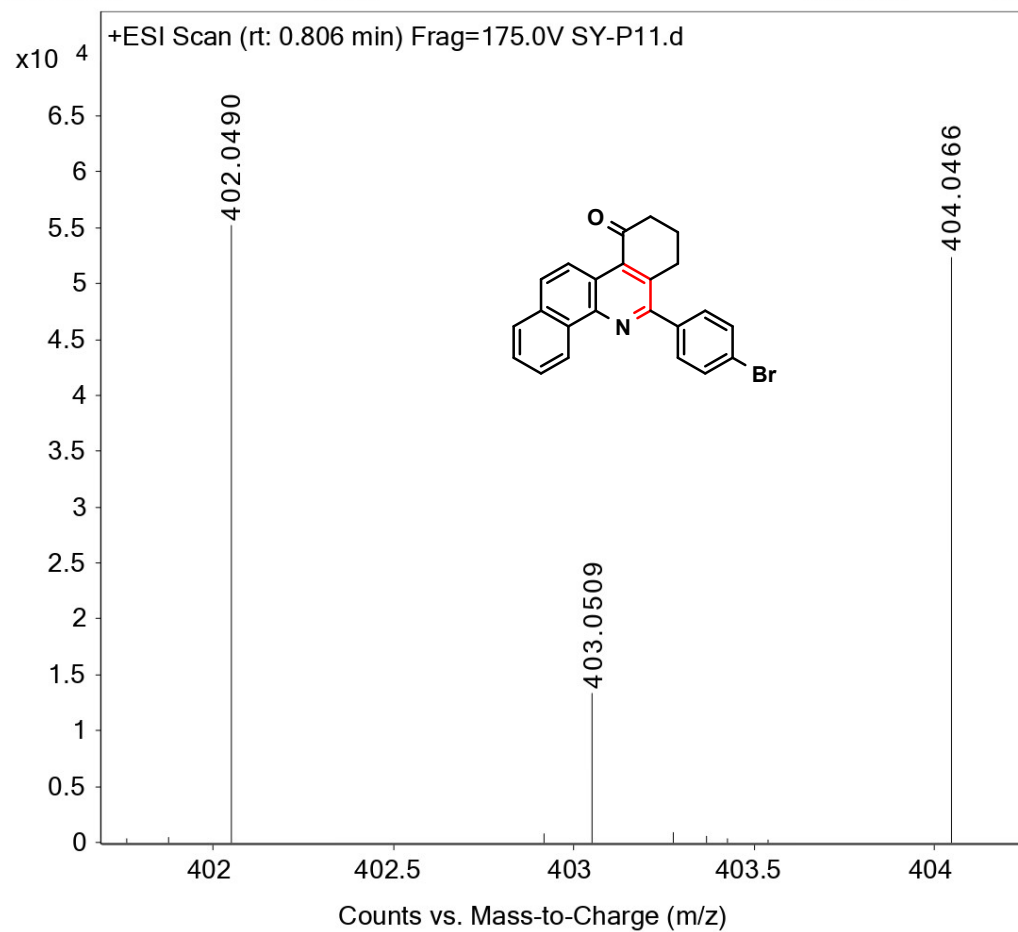

# <sup>1</sup>H NMR Spectrum of Compound 4e

ATK-SY-P10-1H.1.fid — ATK-SY-P10-1H

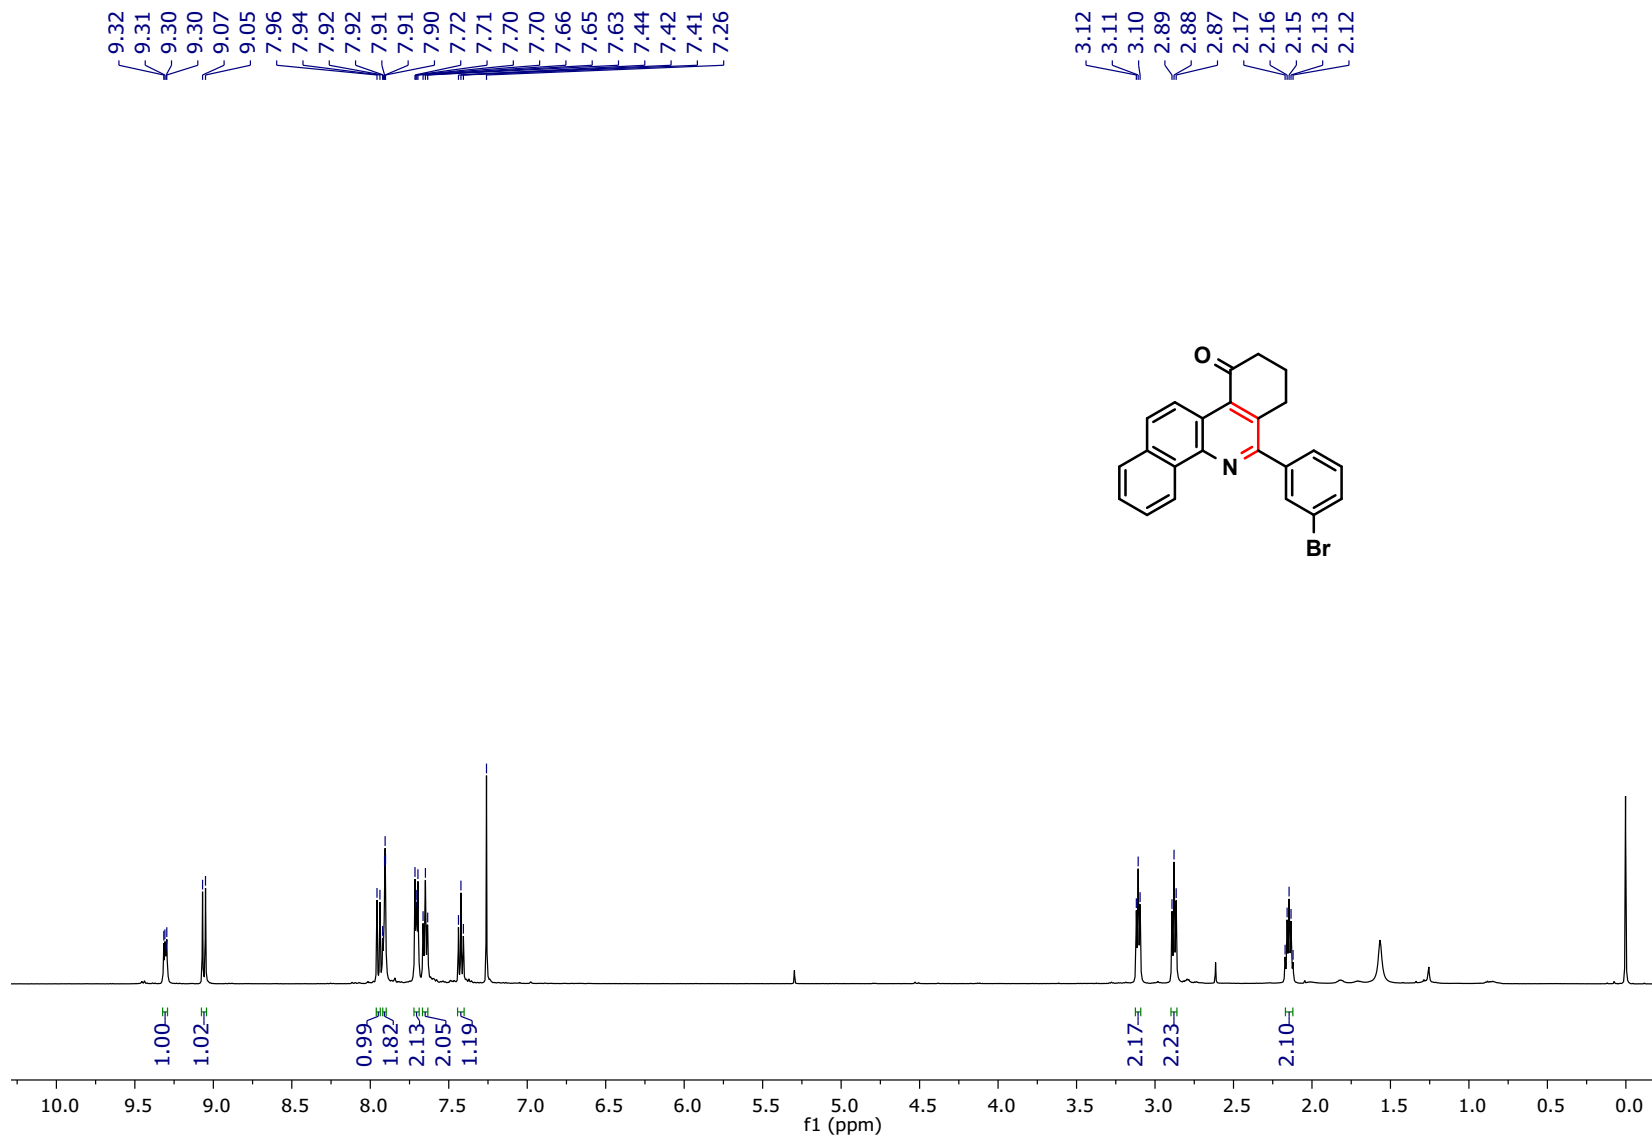

# <sup>13</sup>C NMR Spectrum of Compound 4e

ATK-SY-P10-1H — ATK-SY-P10-1H —

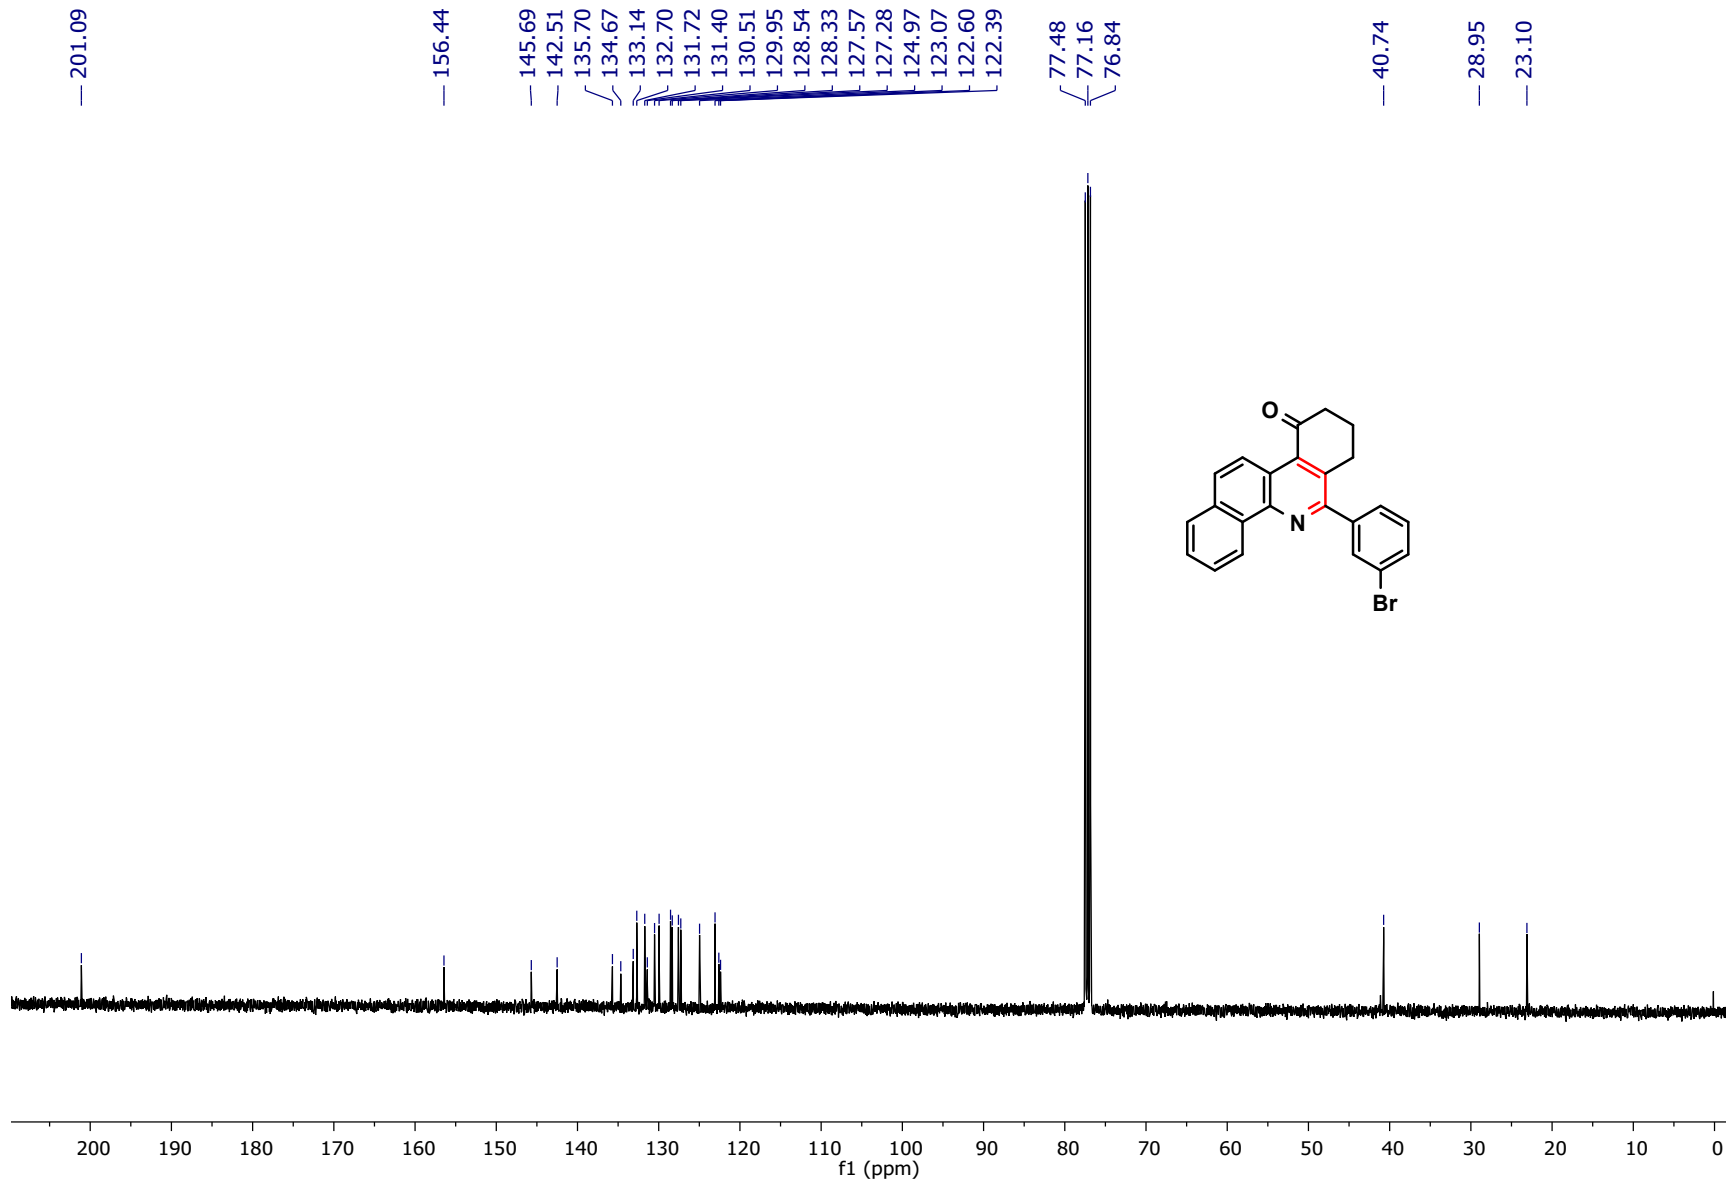

## HRMS Spectrum of Compound 4e

|                    |                   |                               |         |                        |                                   |
|--------------------|-------------------|-------------------------------|---------|------------------------|-----------------------------------|
| <b>Sample Name</b> | SAMPLE 15         | <b>Position</b>               | P2-B6   | <b>Instrument Name</b> | Instrument 1                      |
| <b>User Name</b>   |                   | <b>Inj Vol</b>                | 20      | <b>InjPosition</b>     |                                   |
| <b>Sample Type</b> | Sample            | <b>IRM Calibration Status</b> | Success | <b>Data Filename</b>   | SY-P10-A.d                        |
| <b>ACQ Method</b>  | ESI ALS 100-600.m | <b>Comment</b>                |         | <b>Acquired Time</b>   | 31-Mar-21 08:15:54 PM (UTC+05:30) |

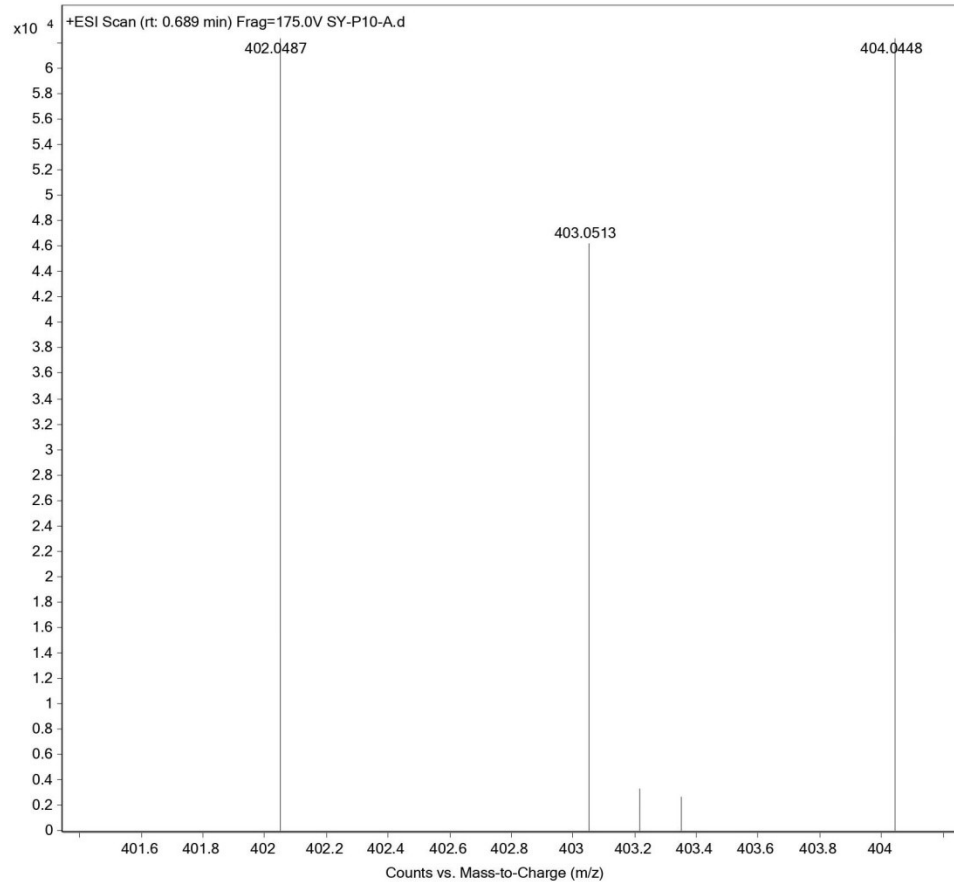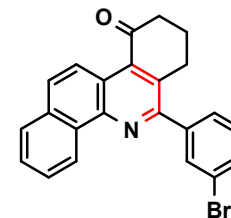

# <sup>1</sup>H NMR Spectrum of Compound 4f

ATK-SY-P47-1H.1.fid — ATK-SY-P47-1H

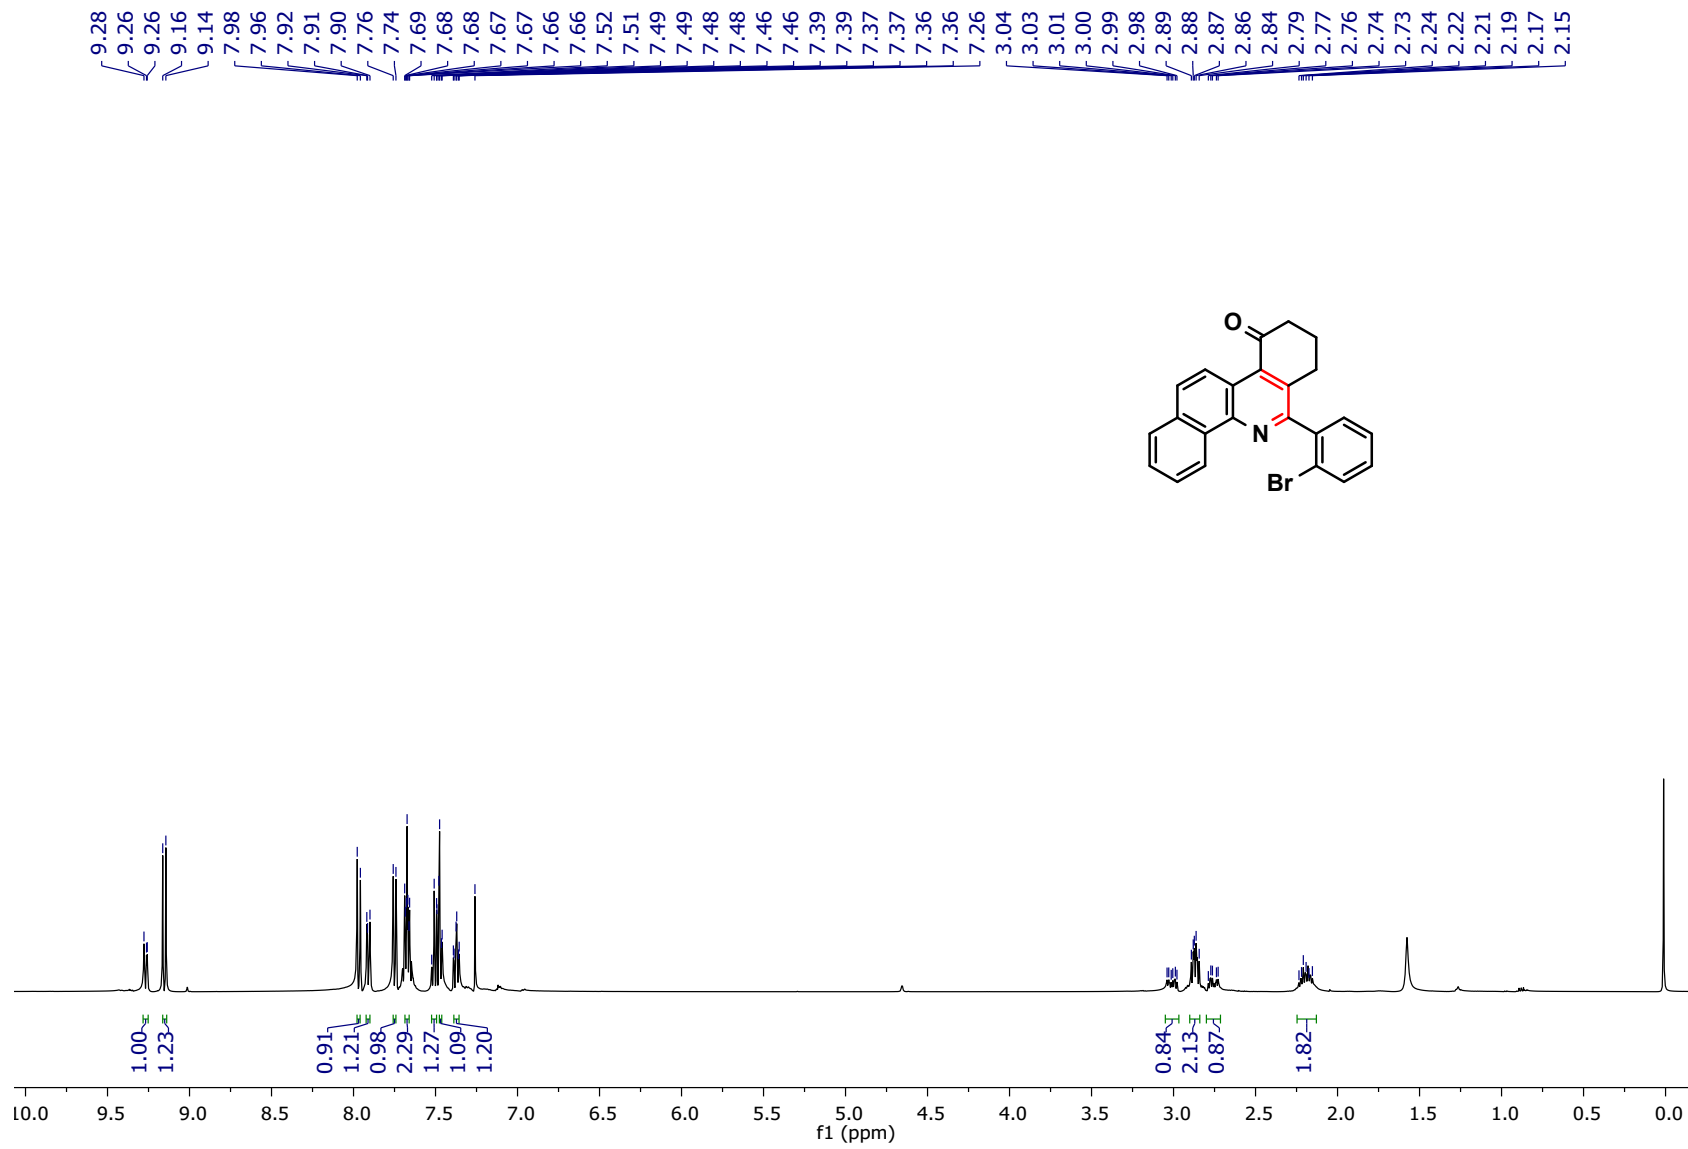

# <sup>13</sup>C NMR Spectrum of Compound 4f

ATK-SY-P47-13C.1.fid — ATK-SY-P47-13C

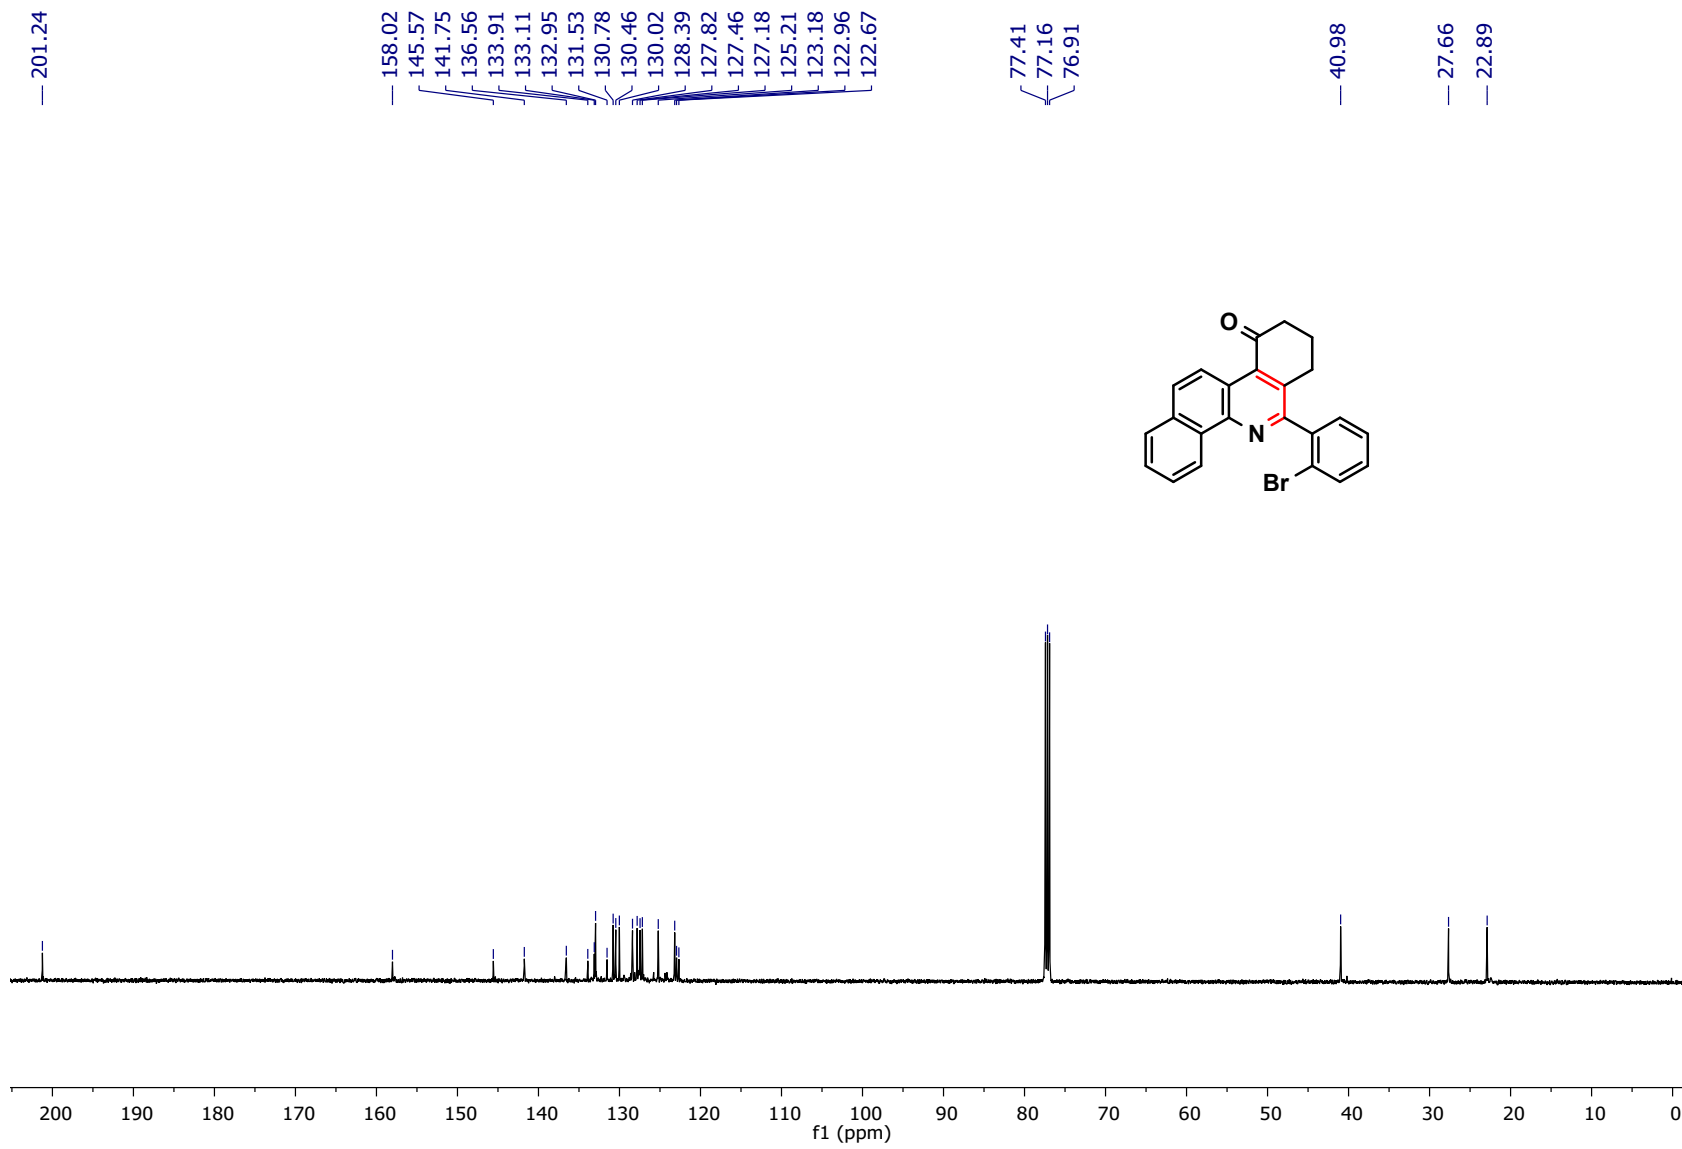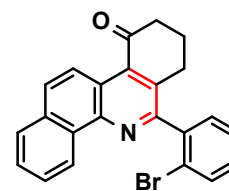

## HRMS Spectrum of Compound 4f

|                    |                    |                               |         |                        |                                   |
|--------------------|--------------------|-------------------------------|---------|------------------------|-----------------------------------|
| <b>Sample Name</b> | WASH               | <b>Position</b>               | P2-A6   | <b>Instrument Name</b> | Instrument 1                      |
| <b>User Name</b>   |                    | <b>Inj Vol</b>                | 20      | <b>InjPosition</b>     |                                   |
| <b>Sample Type</b> | Sample             | <b>IRM Calibration Status</b> | Success | <b>Data Filename</b>   | SY-P47-A.d                        |
| <b>ACQ Method</b>  | ESI ALS 100-1000.m | <b>Comment</b>                |         | <b>Acquired Time</b>   | 31-Aug-21 06:07:41 PM (UTC+05:30) |

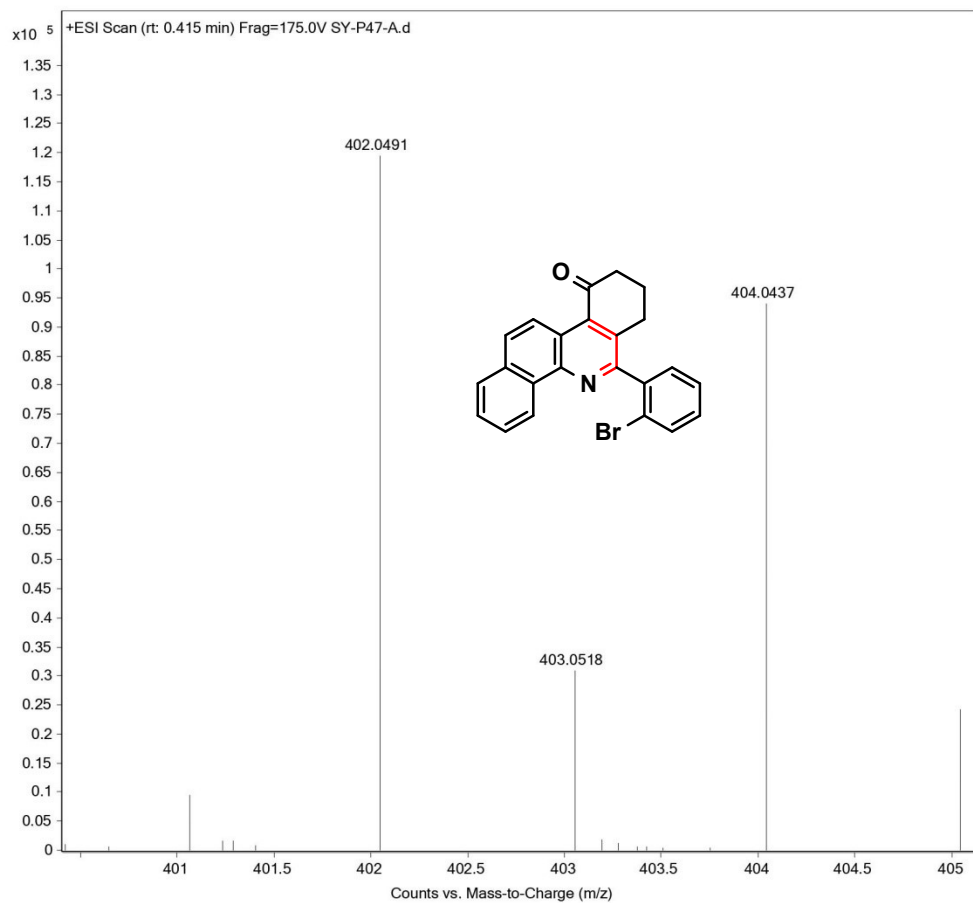

# <sup>1</sup>H NMR Spectrum of Compound 4g

ATK-SY-P6-1H - 1H -

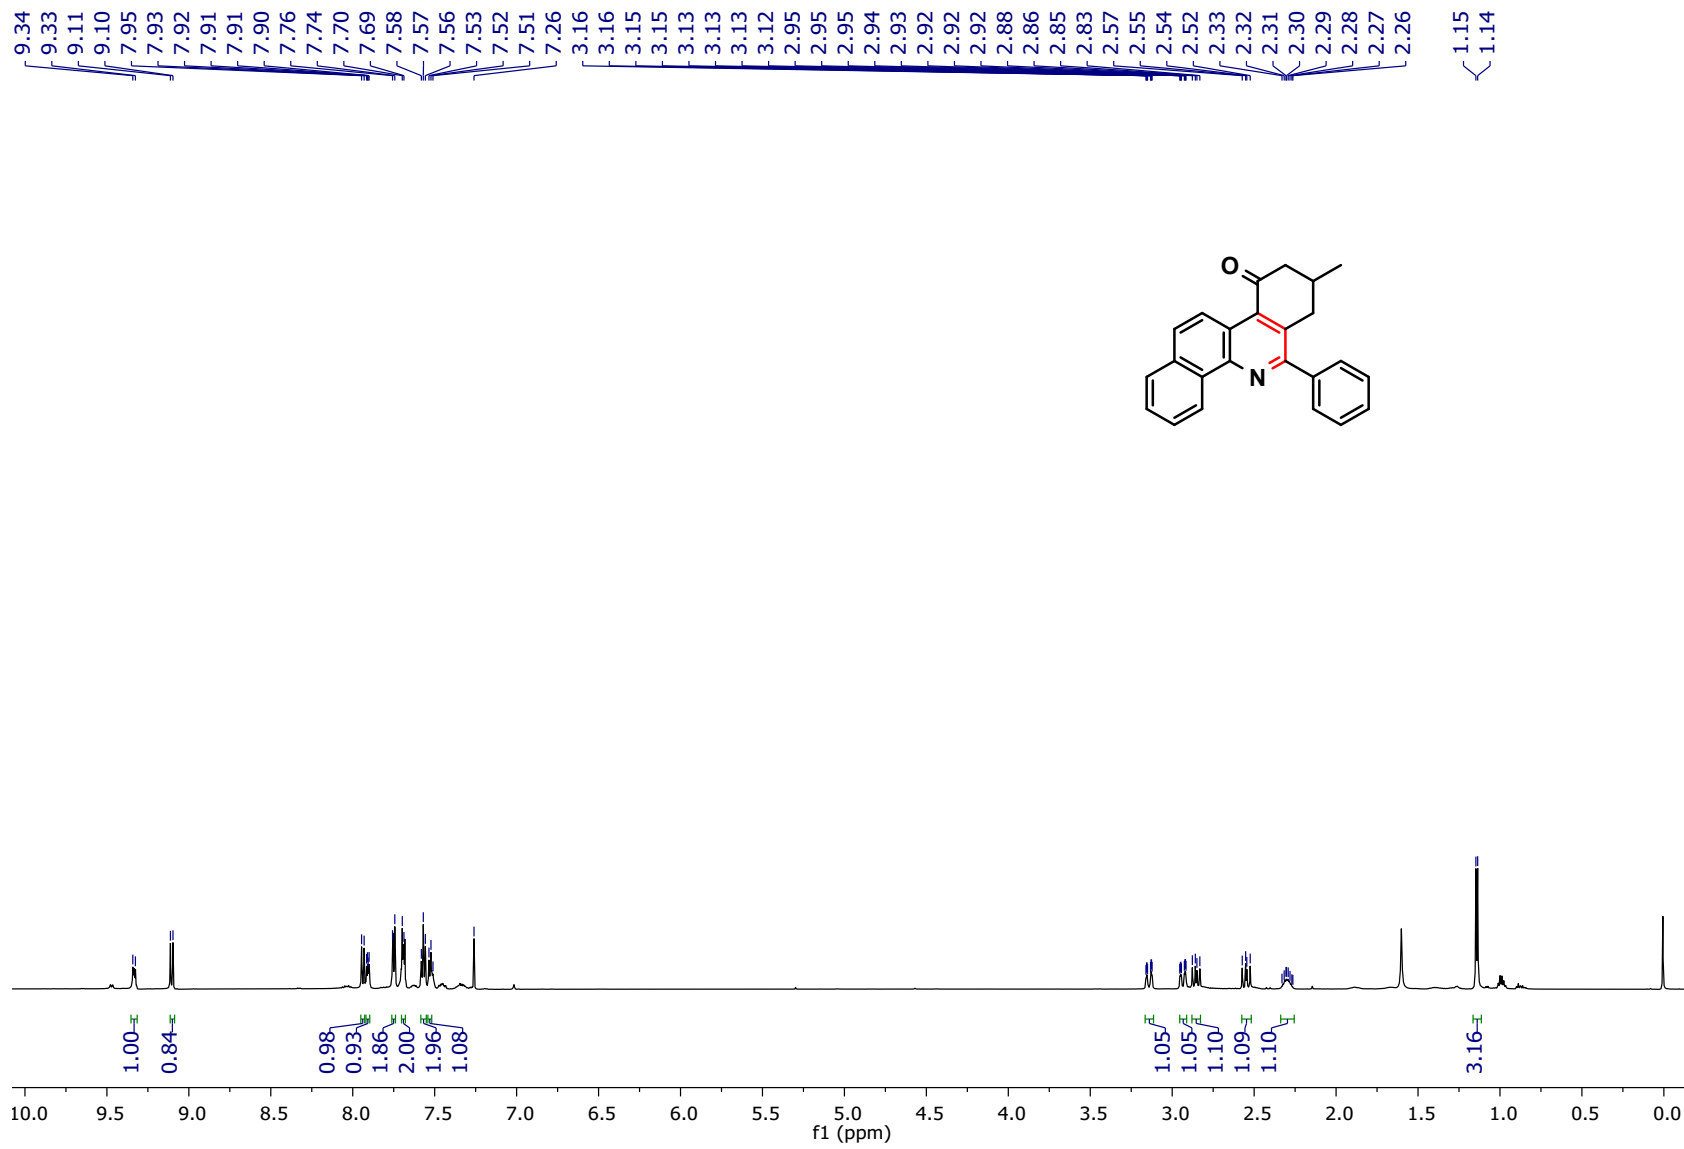



# <sup>13</sup>C NMR Spectrum of Compound 4g

ATK-SY-P6-13C — ATK-SY-P6-13C —

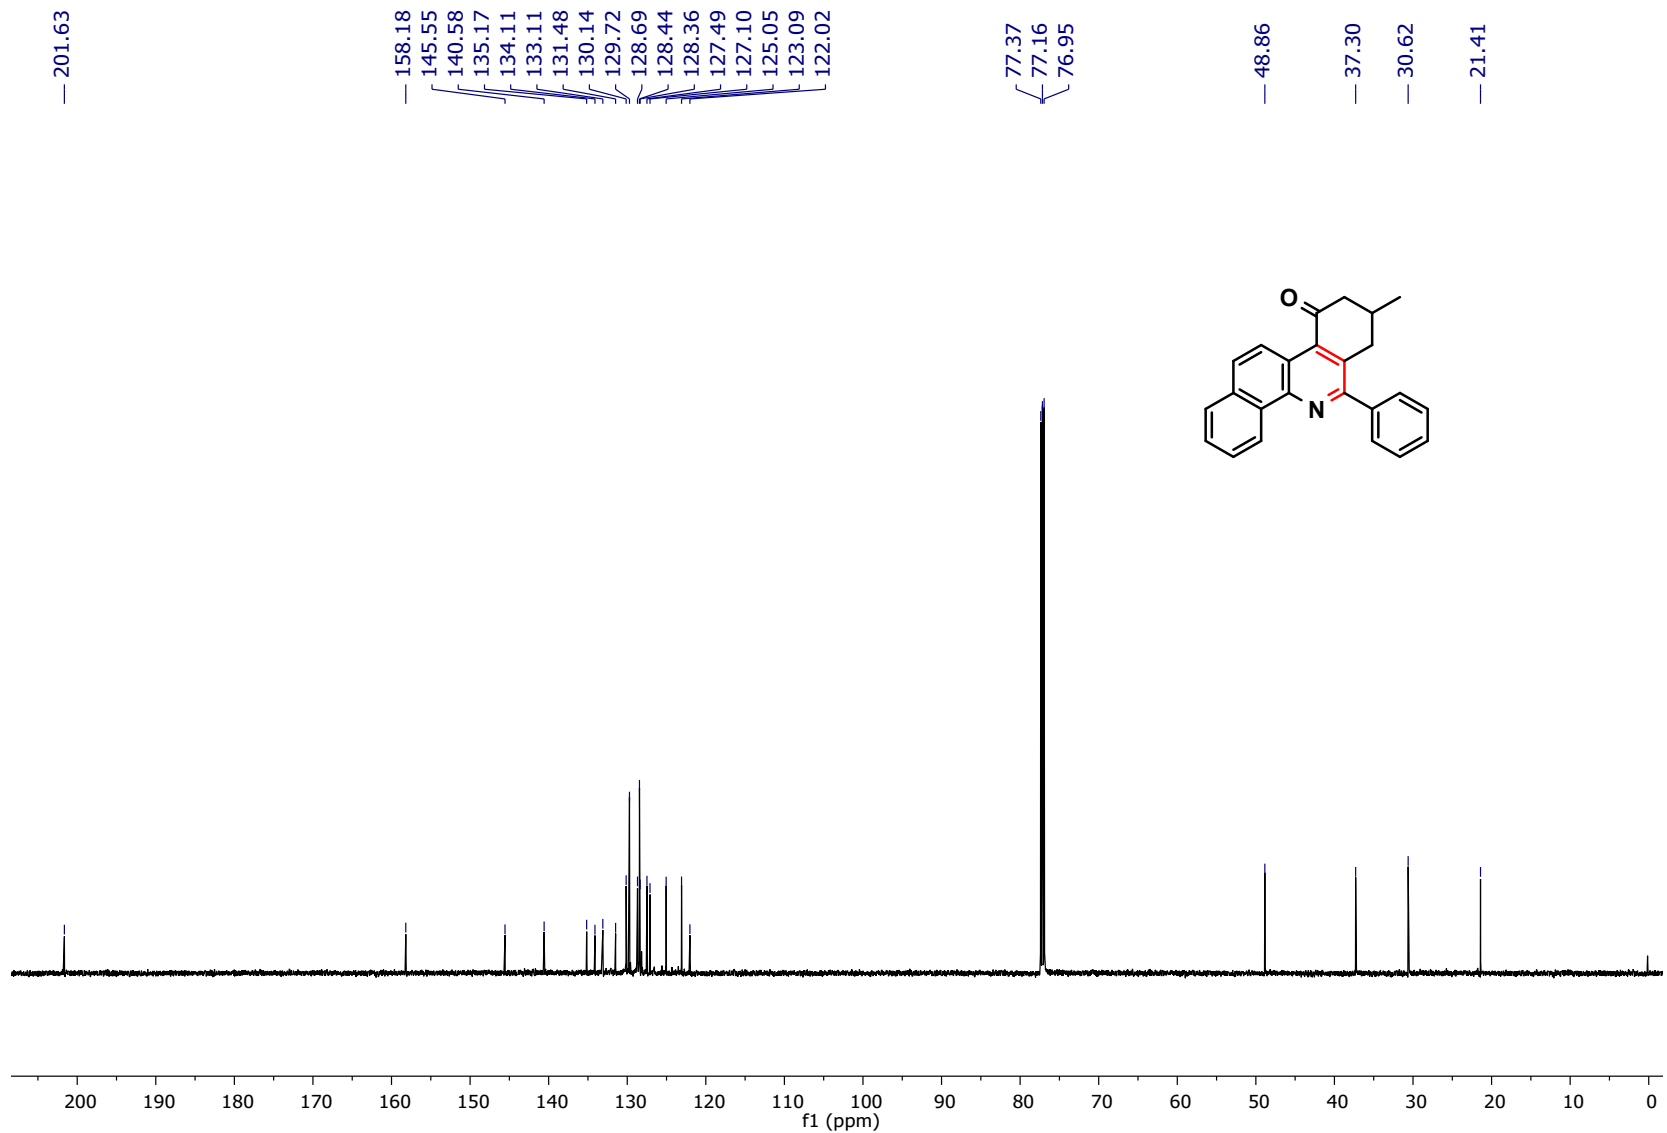

## HRMS Spectrum of Compound 4g

|             |                   |                        |         |                 |                                 |
|-------------|-------------------|------------------------|---------|-----------------|---------------------------------|
| Sample Name | ATK-SY-P6         | Position               | P2-A4   | Instrument Name | Instrument 1                    |
| User Name   |                   | Inj Vol                | 20      | InjPosition     |                                 |
| Sample Type | Sample            | IRM Calibration Status | Success | Data Filename   | ATK-SY-P6.d                     |
| ACQ Method  | ESI ALS 100-600.m | Comment                |         | Acquired Time   | 15-12-2020 16:44:55 (UTC+05:30) |

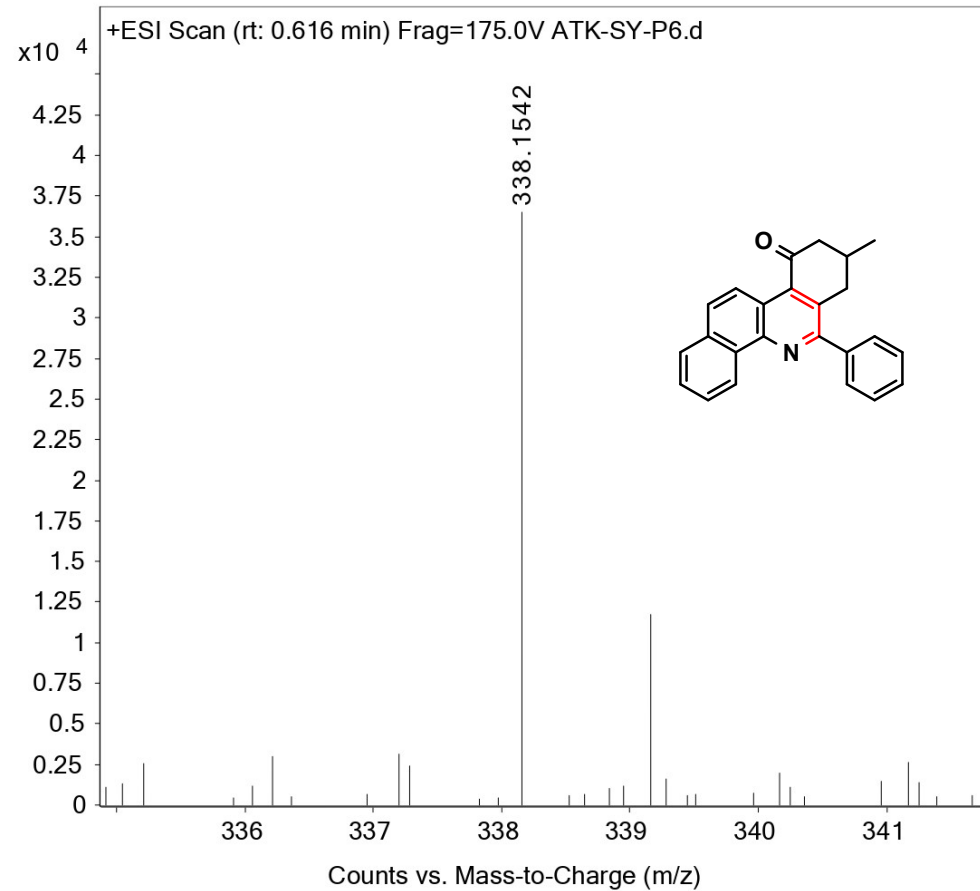

# <sup>1</sup>H NMR Spectrum of Compound 4h

ATK-SY-P22-1H — ATK-SY-P22-1H —

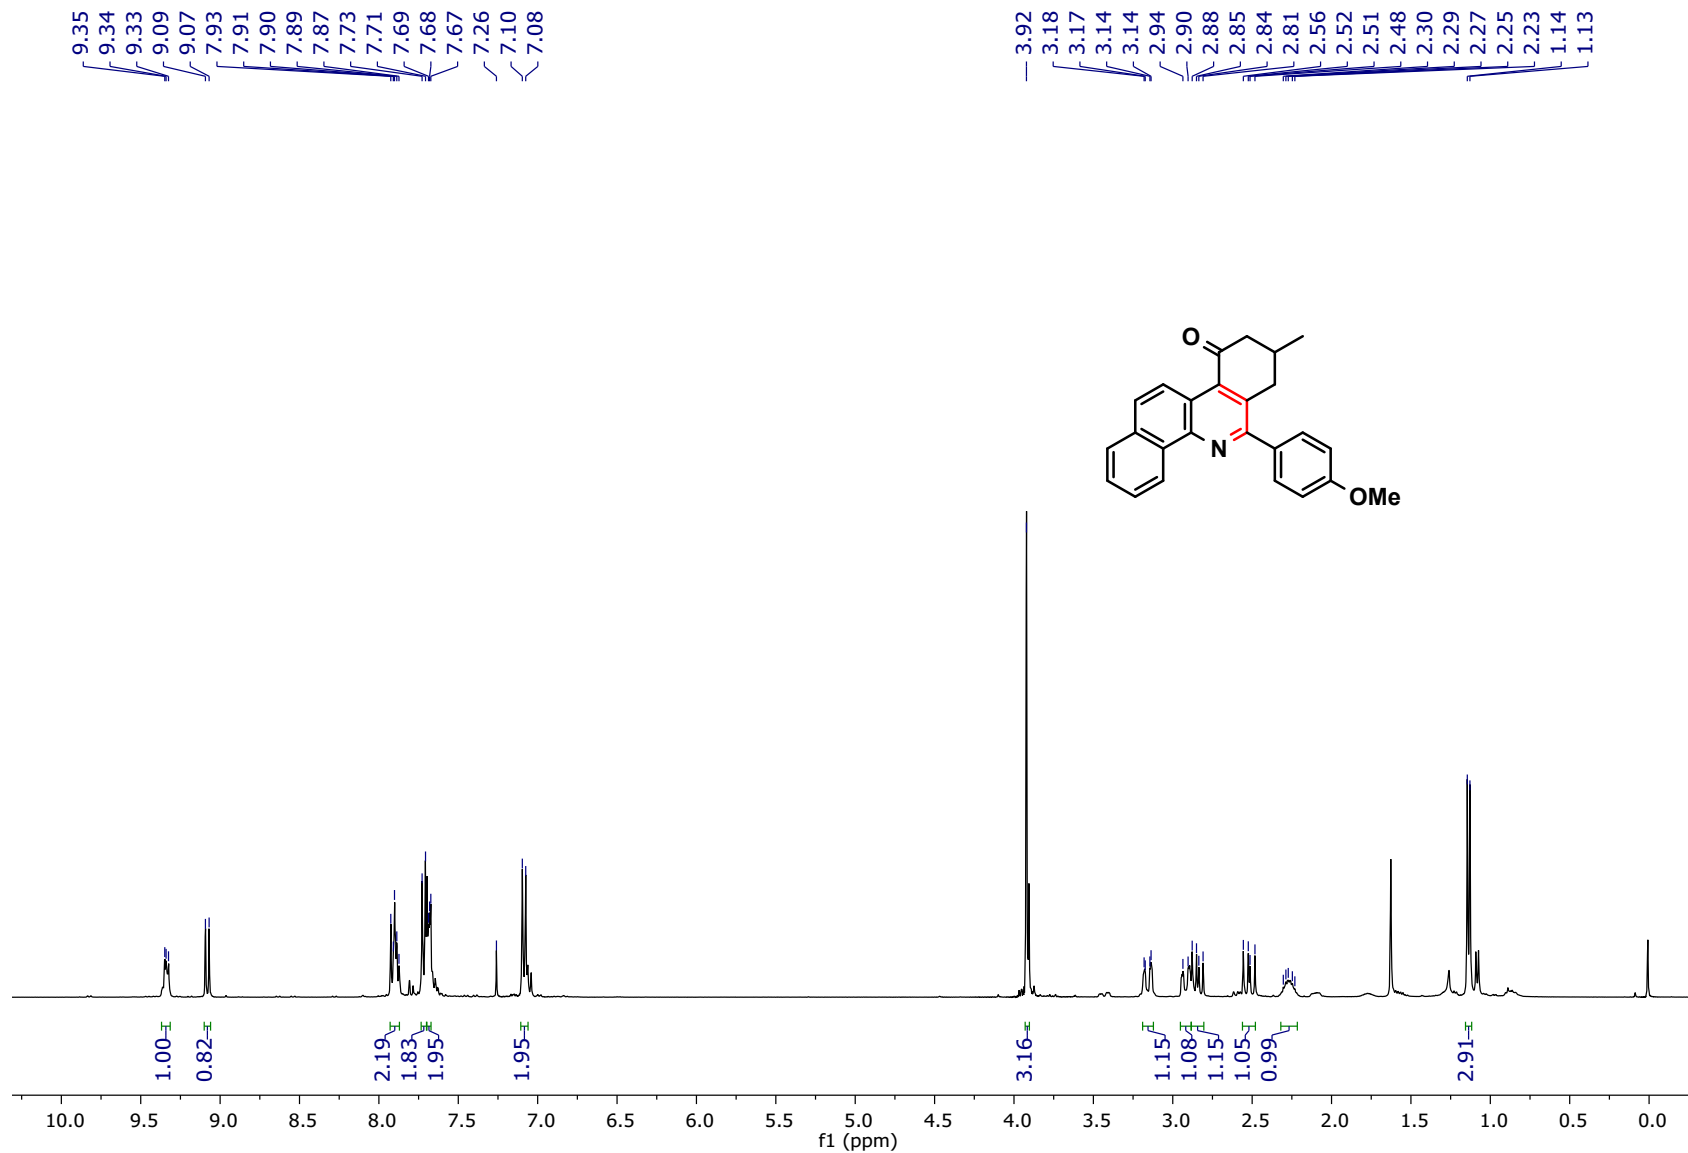

### <sup>13</sup>C NMR Spectrum of Compound 4h

ATK-SY-P22-13C — ATK-SY-P22-13C —

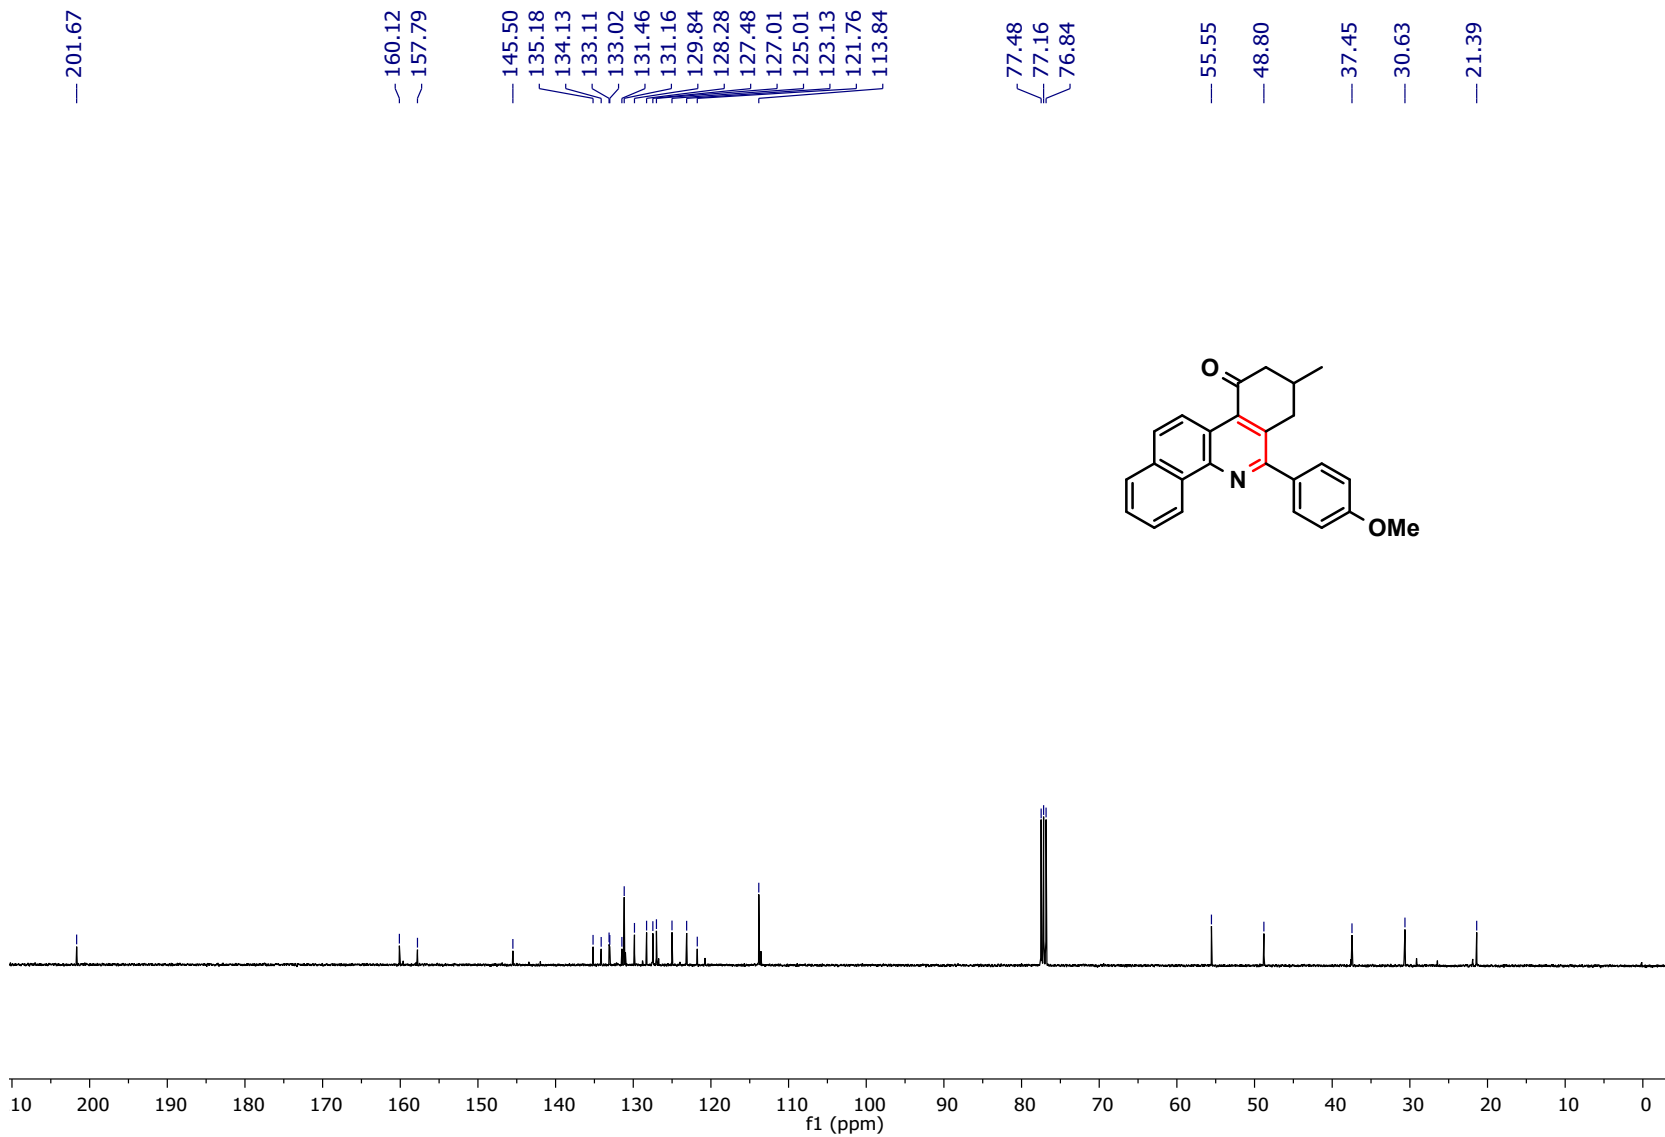

## HRMS Spectrum of compound 4h

|                    |                    |                               |         |                        |                                 |
|--------------------|--------------------|-------------------------------|---------|------------------------|---------------------------------|
| <b>Sample Name</b> | SAMPLE 17          | <b>Position</b>               | P2-B8   | <b>Instrument Name</b> | Instrument 1                    |
| <b>User Name</b>   |                    | <b>Inj Vol</b>                | 20      | <b>InjPosition</b>     |                                 |
| <b>Sample Type</b> | Sample             | <b>IRM Calibration Status</b> | Success | <b>Data Filename</b>   | ATK-SY-P22A.d                   |
| <b>ACQ Method</b>  | ESI ALS 100-1000.m | <b>Comment</b>                |         | <b>Acquired Time</b>   | 27-01-2021 23:03:54 (UTC+05:30) |

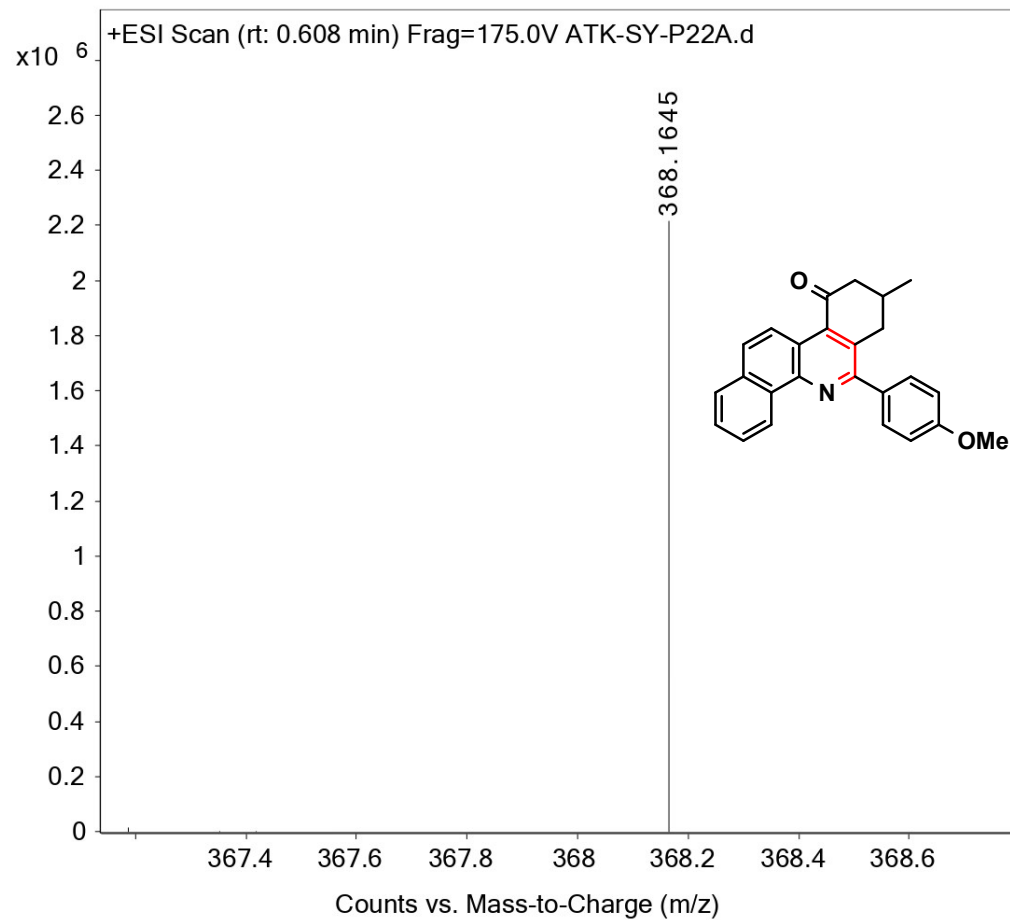

# <sup>1</sup>H NMR Spectrum of Compound 4i

ATK-Sy-P7-1H - 1H -

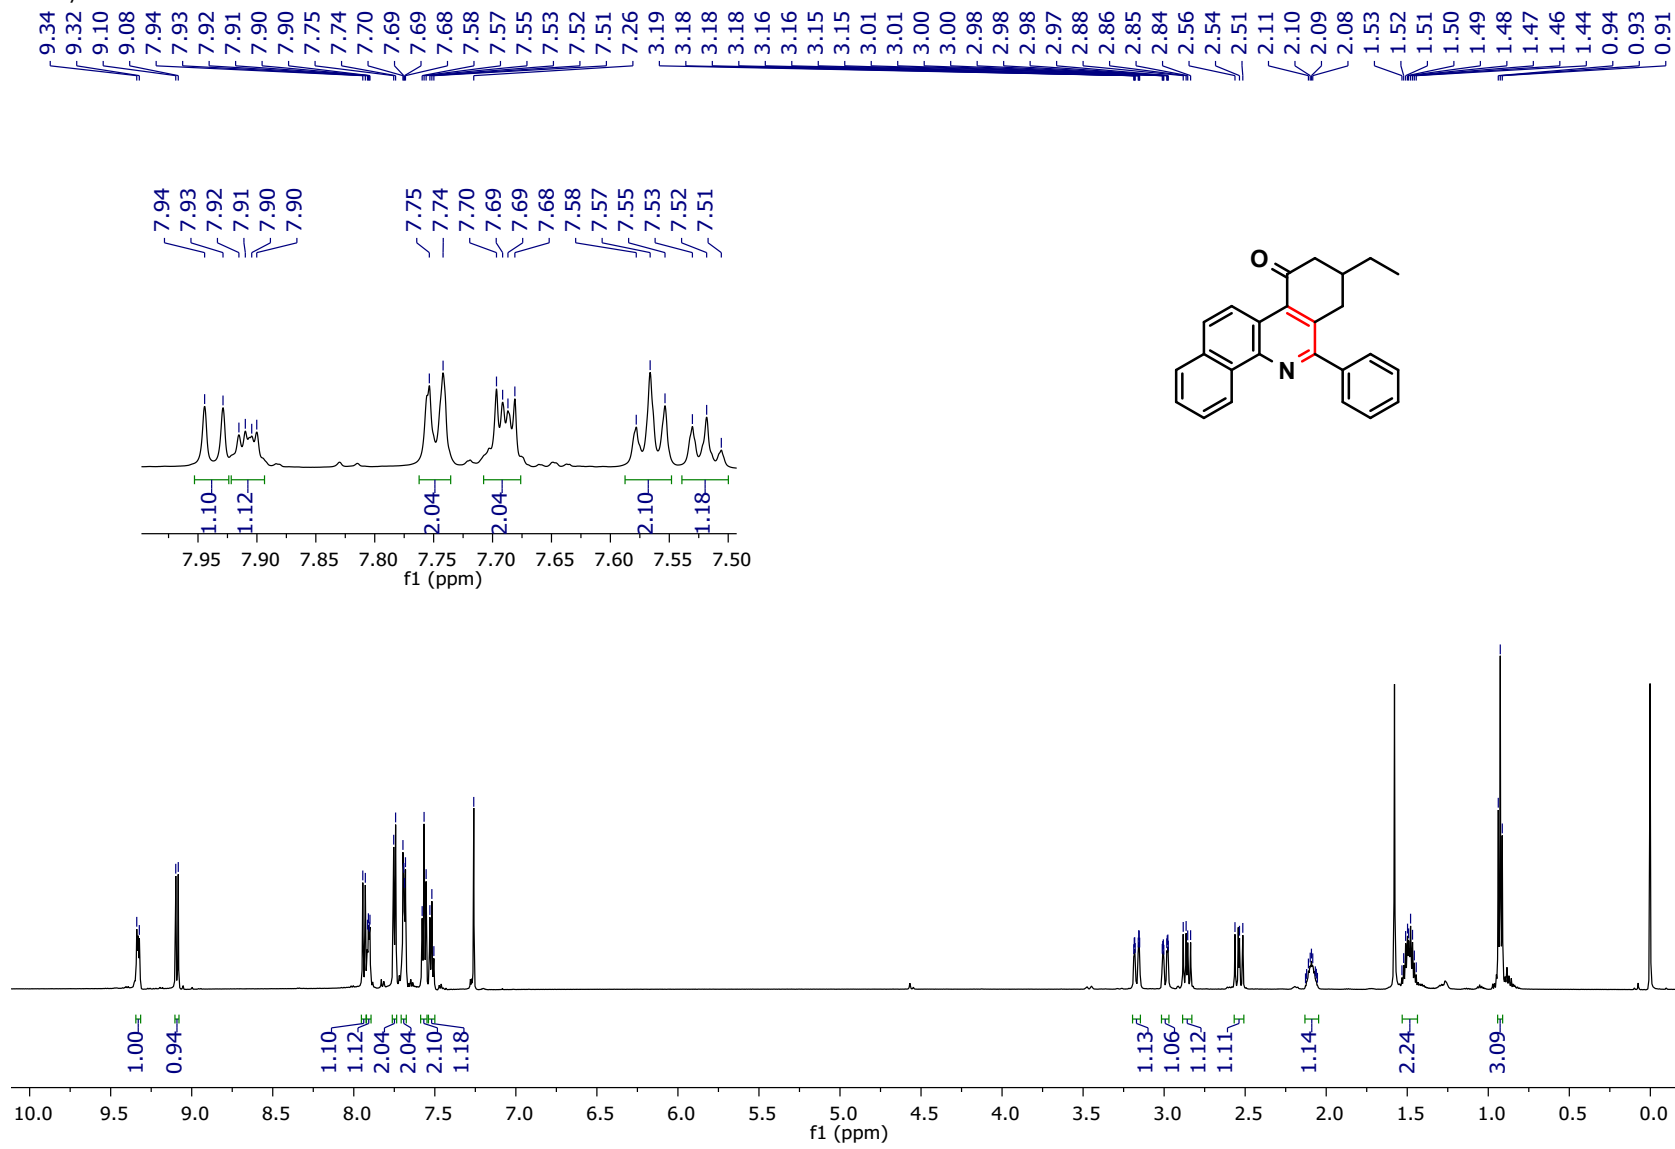

# <sup>13</sup>C NMR Spectrum of Compound 4i

ATK-SY-P7-13C — ATK-SY-P7-13C —

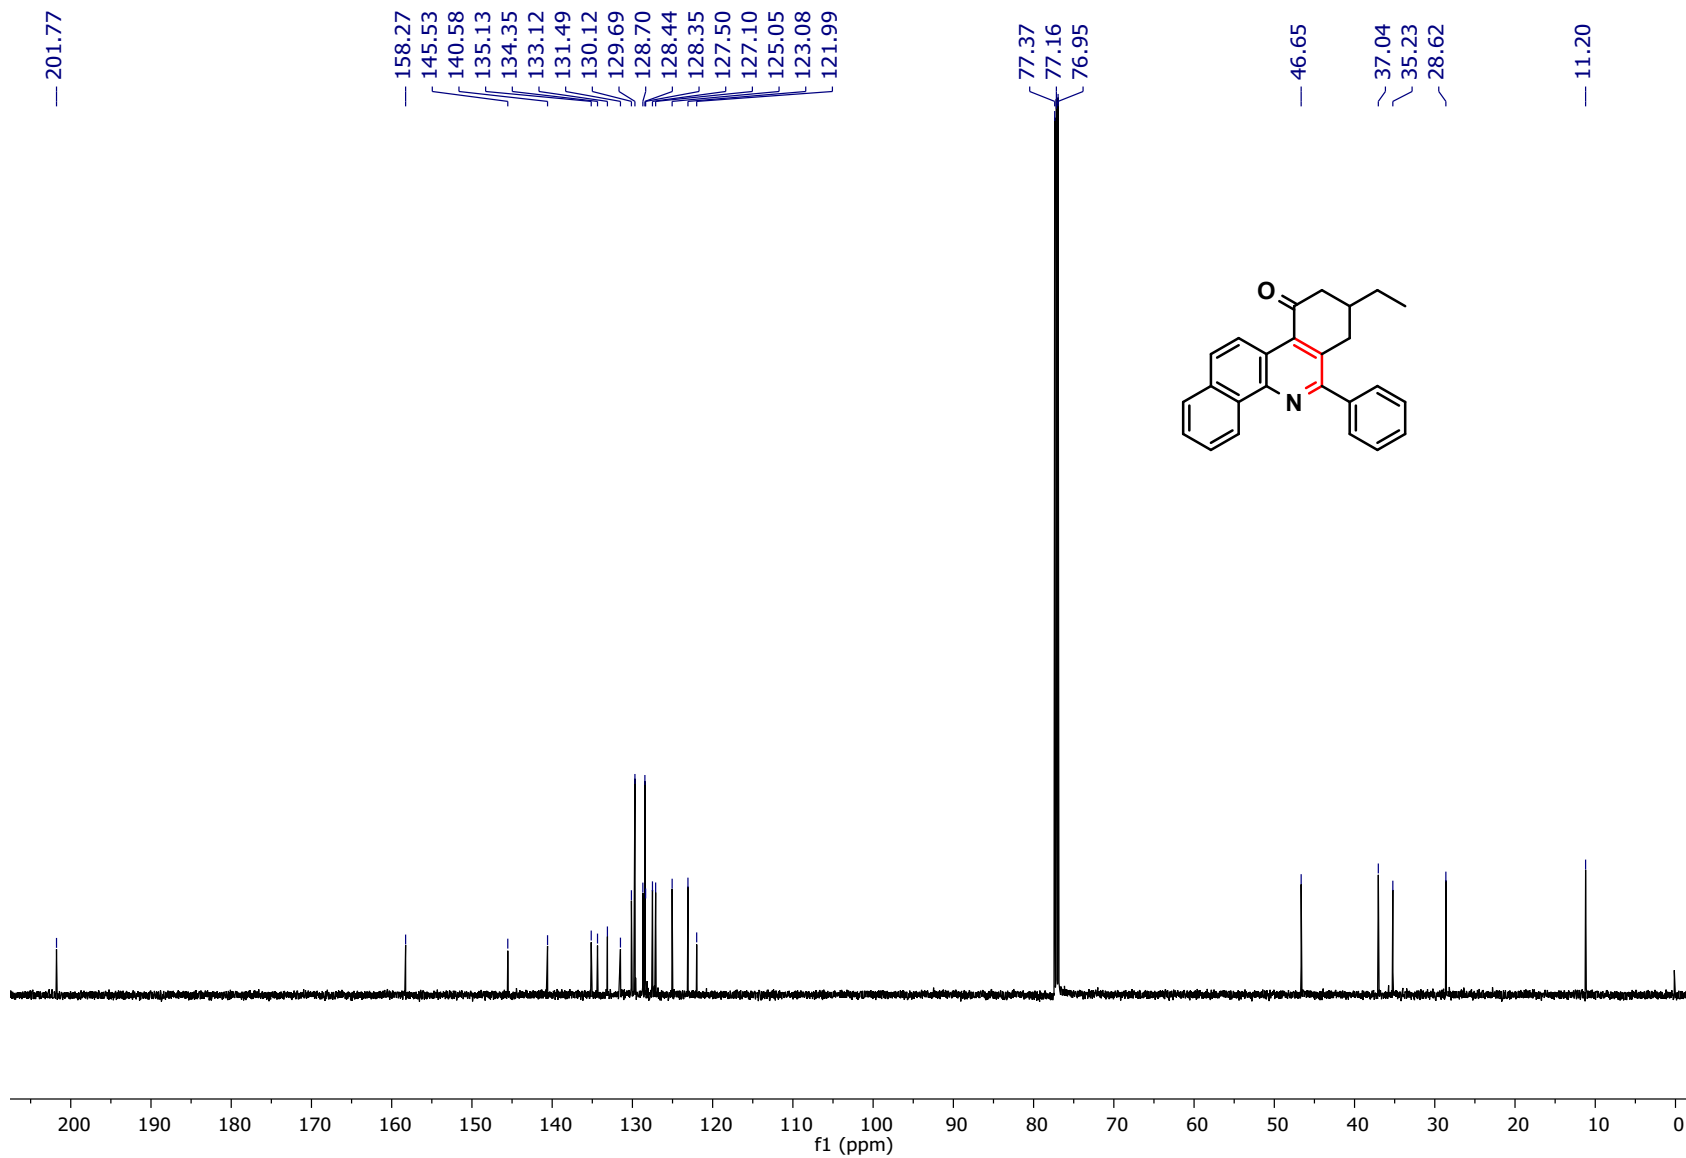

## HRMS Spectrum of Compound 4i

|             |                   |                        |         |                 |                                 |
|-------------|-------------------|------------------------|---------|-----------------|---------------------------------|
| Sample Name | ATK-SY-P7         | Position               | P2-A5   | Instrument Name | Instrument 1                    |
| User Name   |                   | Inj Vol                | 20      | InjPosition     |                                 |
| Sample Type | Sample            | IRM Calibration Status | Success | Data Filename   | ATK-SY-P7.d                     |
| ACQ Method  | ESI ALS 100-600.m | Comment                |         | Acquired Time   | 15-12-2020 16:54:33 (UTC+05:30) |

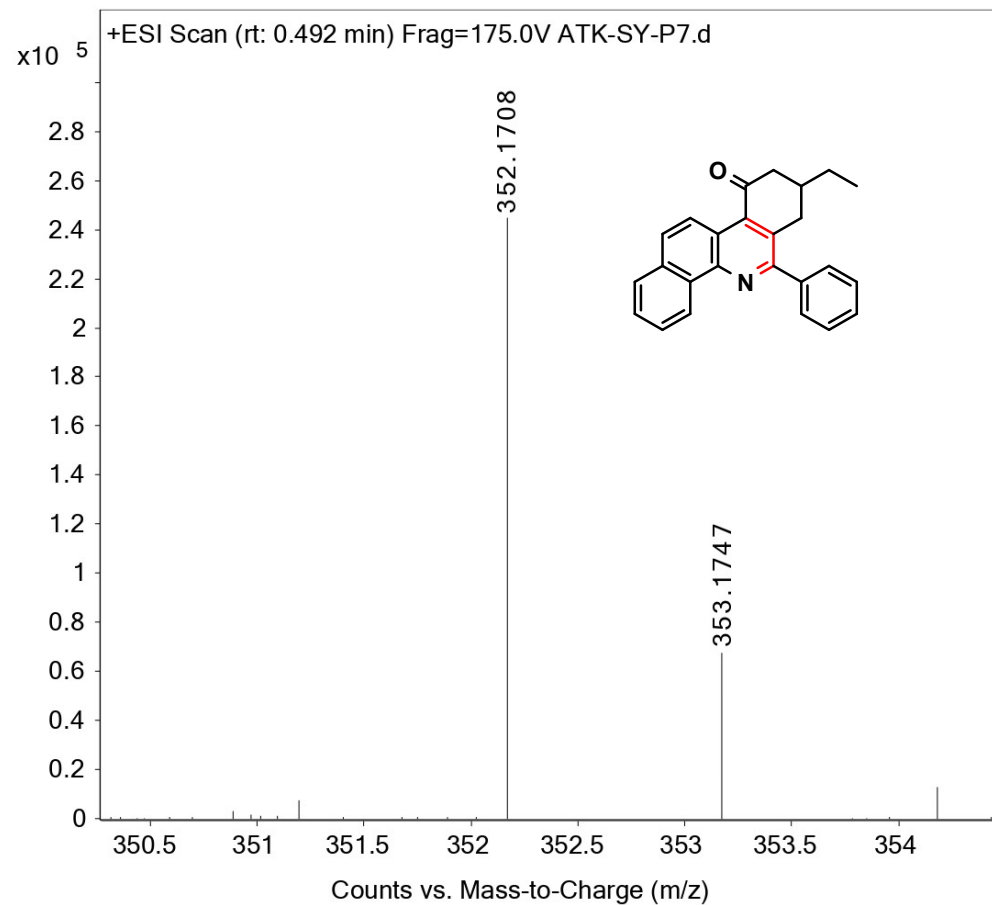



# <sup>1</sup>H NMR Spectrum of Compound 4j

ATK-SY-P23-1H — ATK-SY-P23-1H —

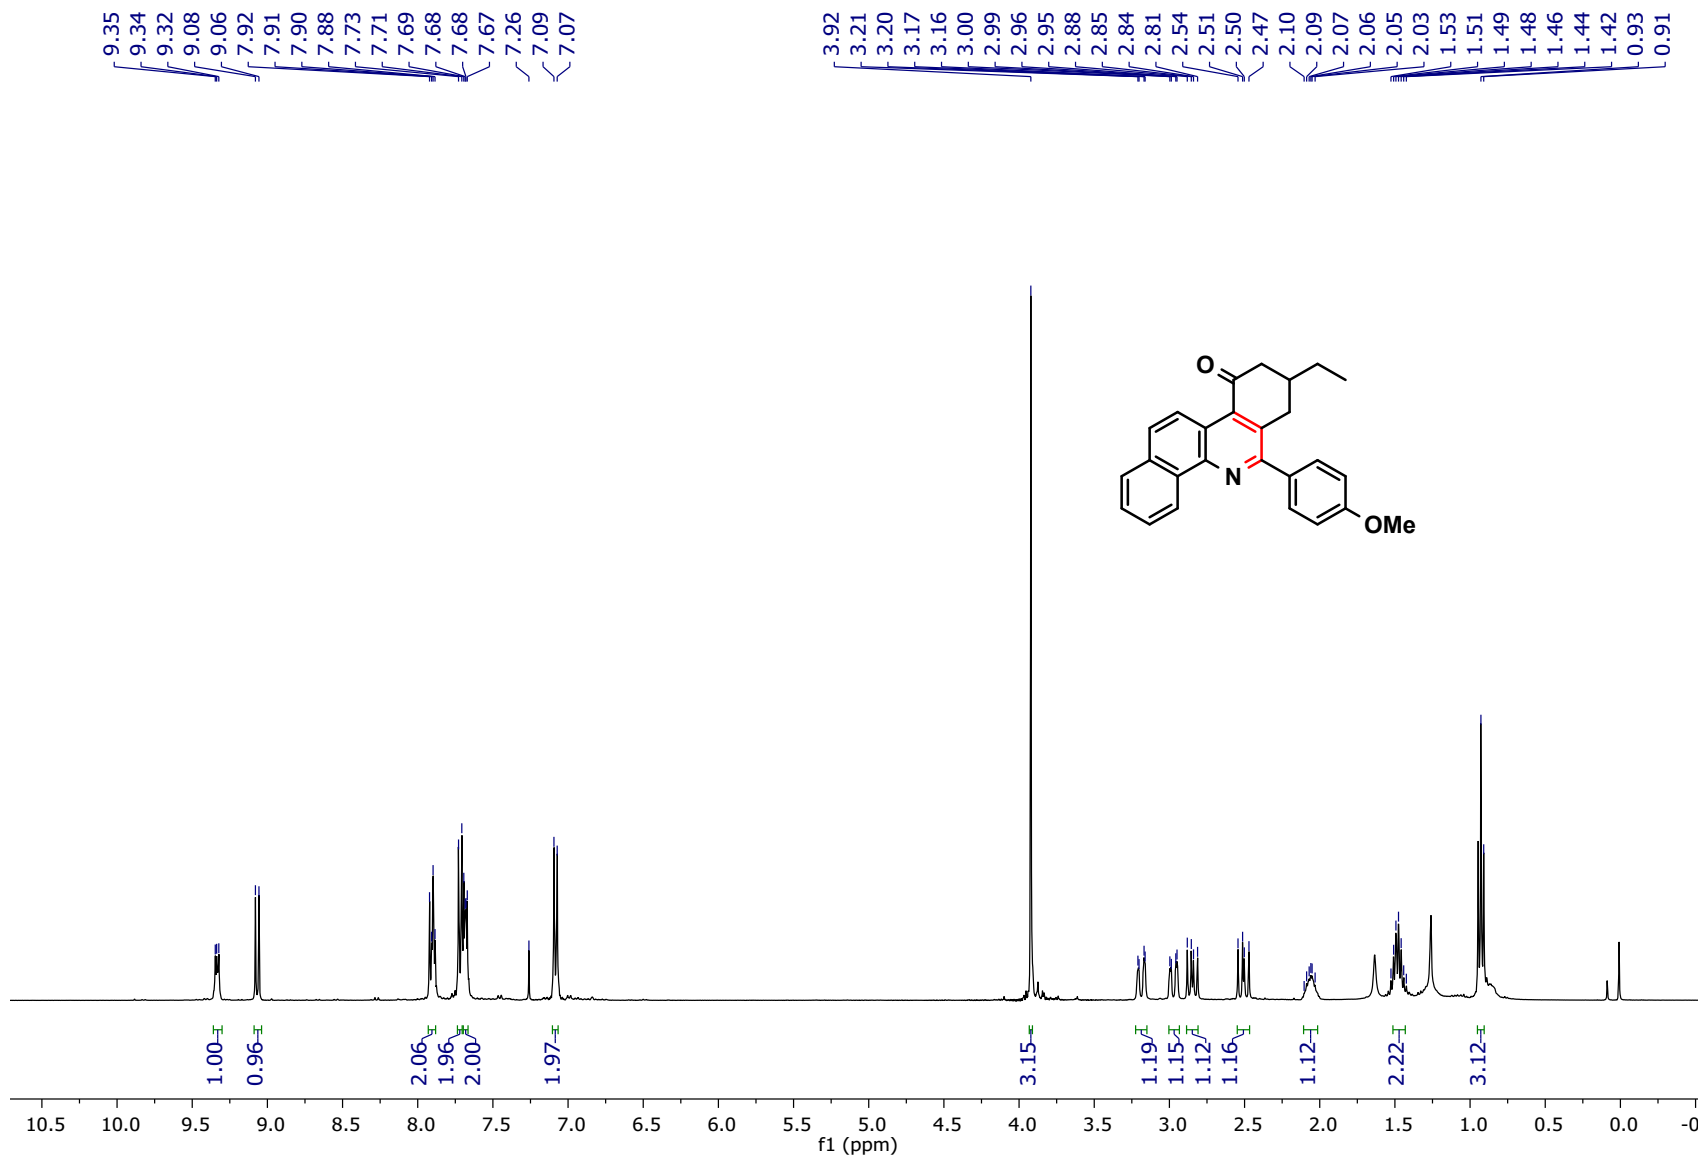

# <sup>13</sup>C NMR Spectrum of Compound 4j

ATK-SY-P23-13C — ATK-SY-P23-13C —

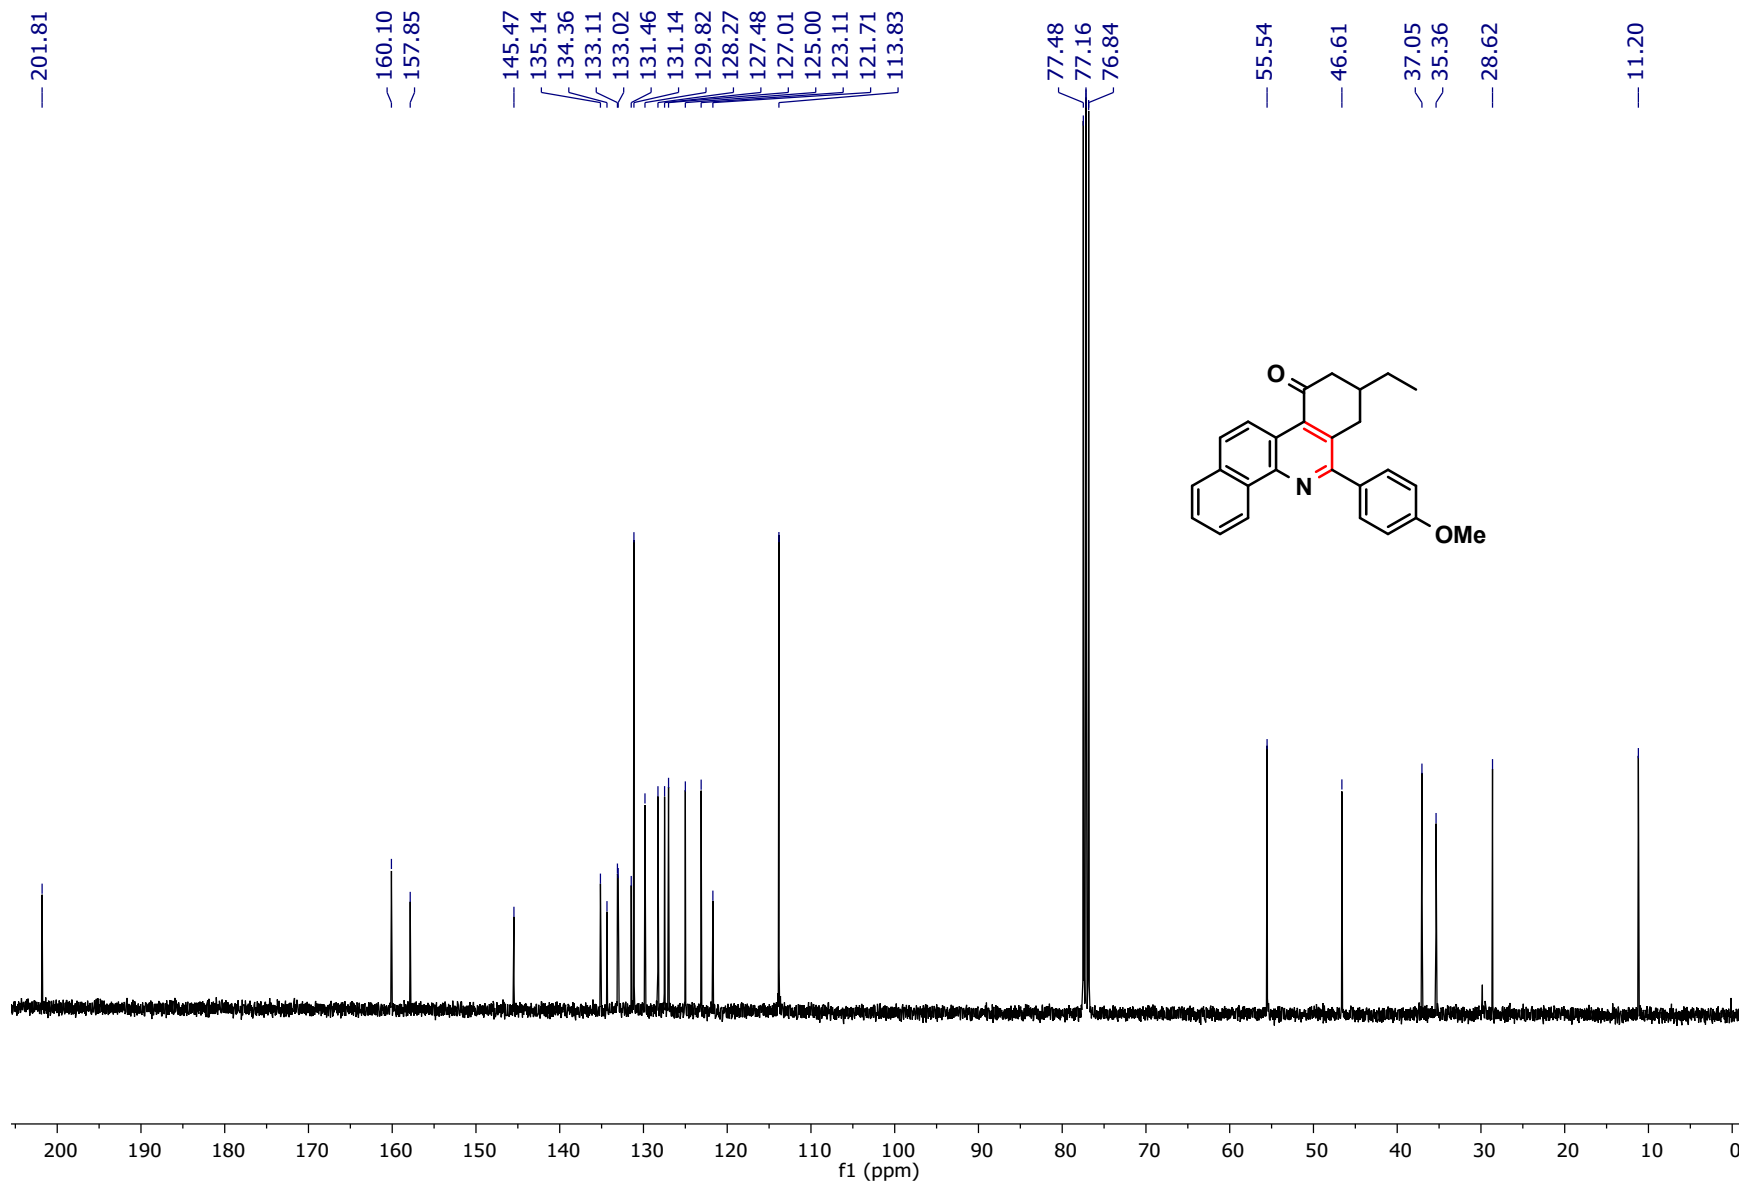

## HRMS Spectrum of compound 4j

|             |                    |                        |         |                 |                                 |
|-------------|--------------------|------------------------|---------|-----------------|---------------------------------|
| Sample Name | SAMPLE             | Position               | P2-B9   | Instrument Name | Instrument 1                    |
| User Name   |                    | Inj Vol                | 20      | InjPosition     |                                 |
| Sample Type | Sample             | IRM Calibration Status | Success | Data Filename   | ATK-SY-P23.d                    |
| ACQ Method  | ESI ALS 100-1000.m | Comment                |         | Acquired Time   | 23-01-2021 09:47:04 (UTC+05:30) |

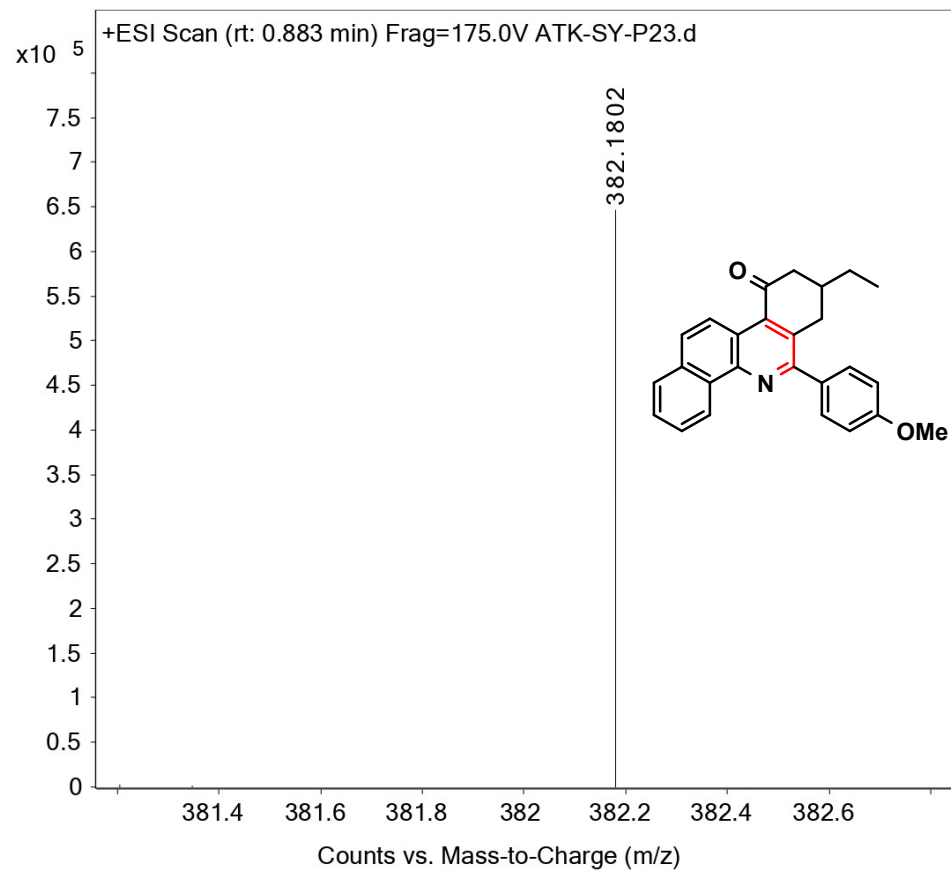

# <sup>1</sup>H NMR Spectrum of Compound 4k

ATK-AY-P17-1H — ATK-AY-P17-1H —

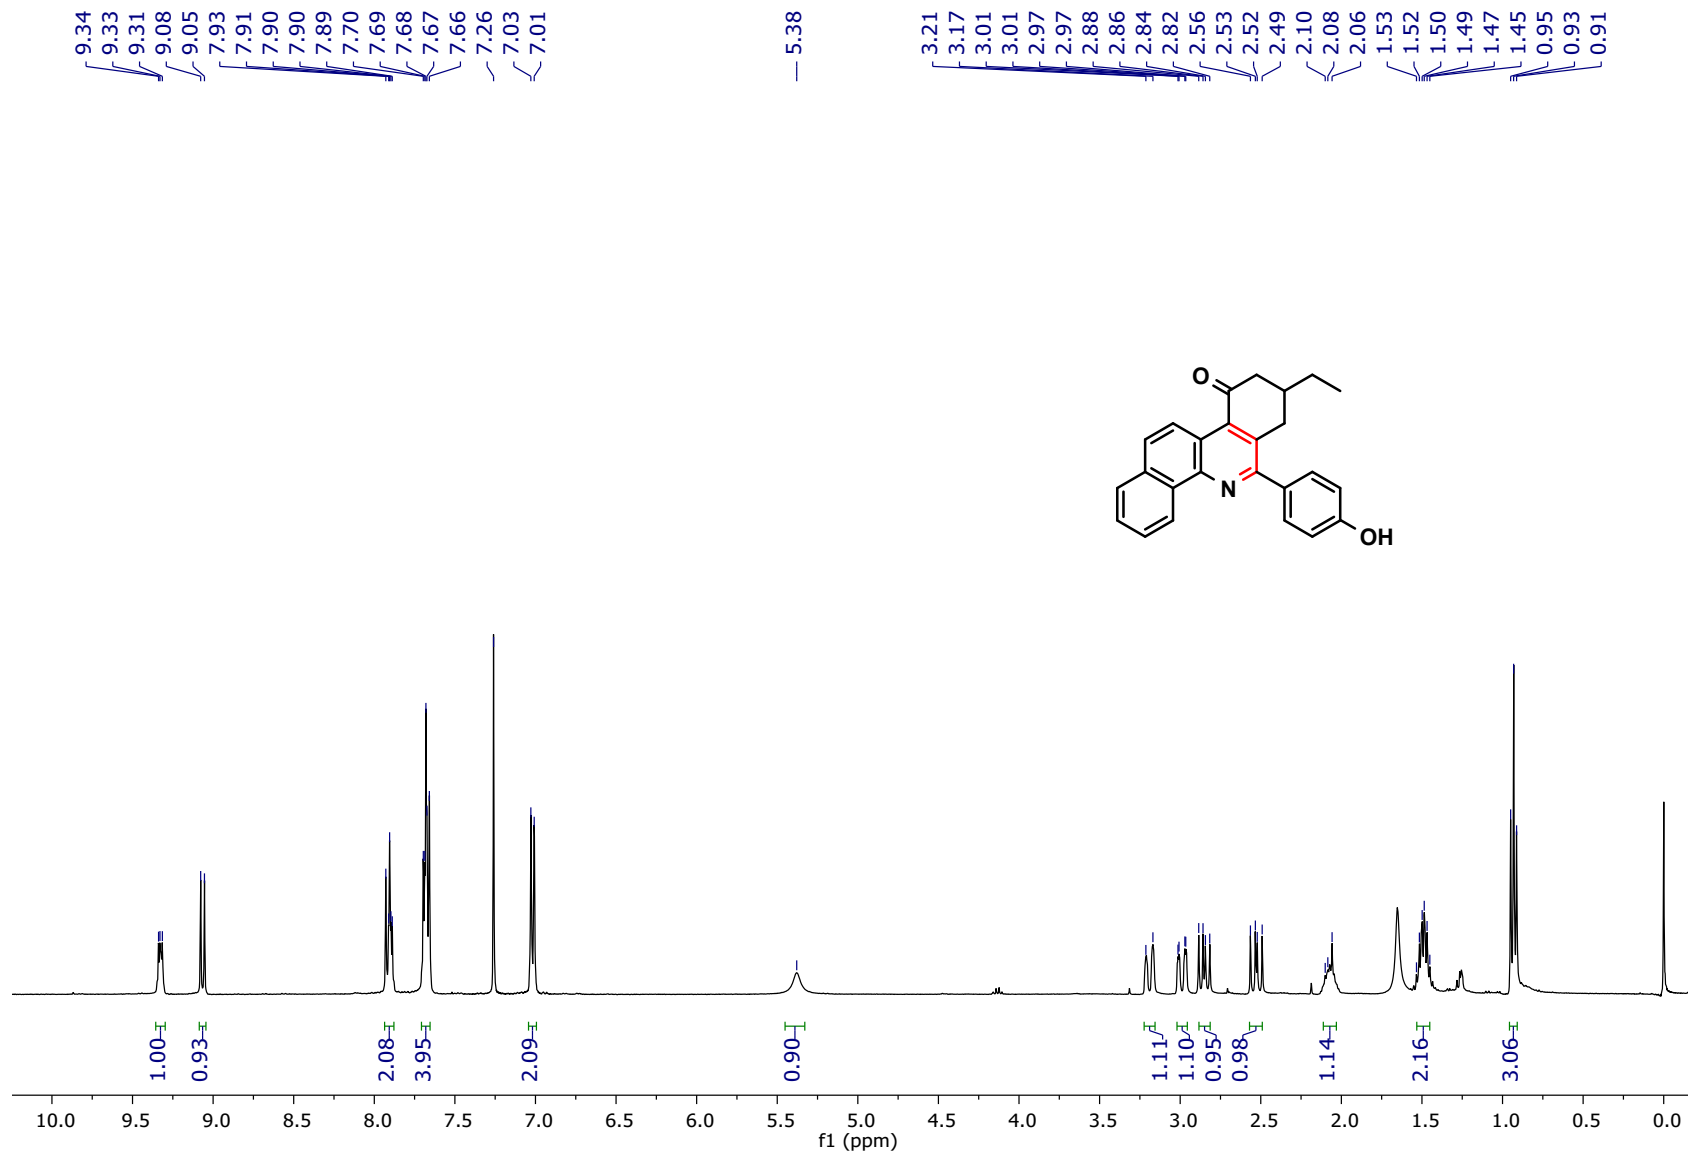

# <sup>13</sup>C NMR Spectrum of Compound 4k

ATK-AY-P17-13C — ATK-AY-P17-13C —

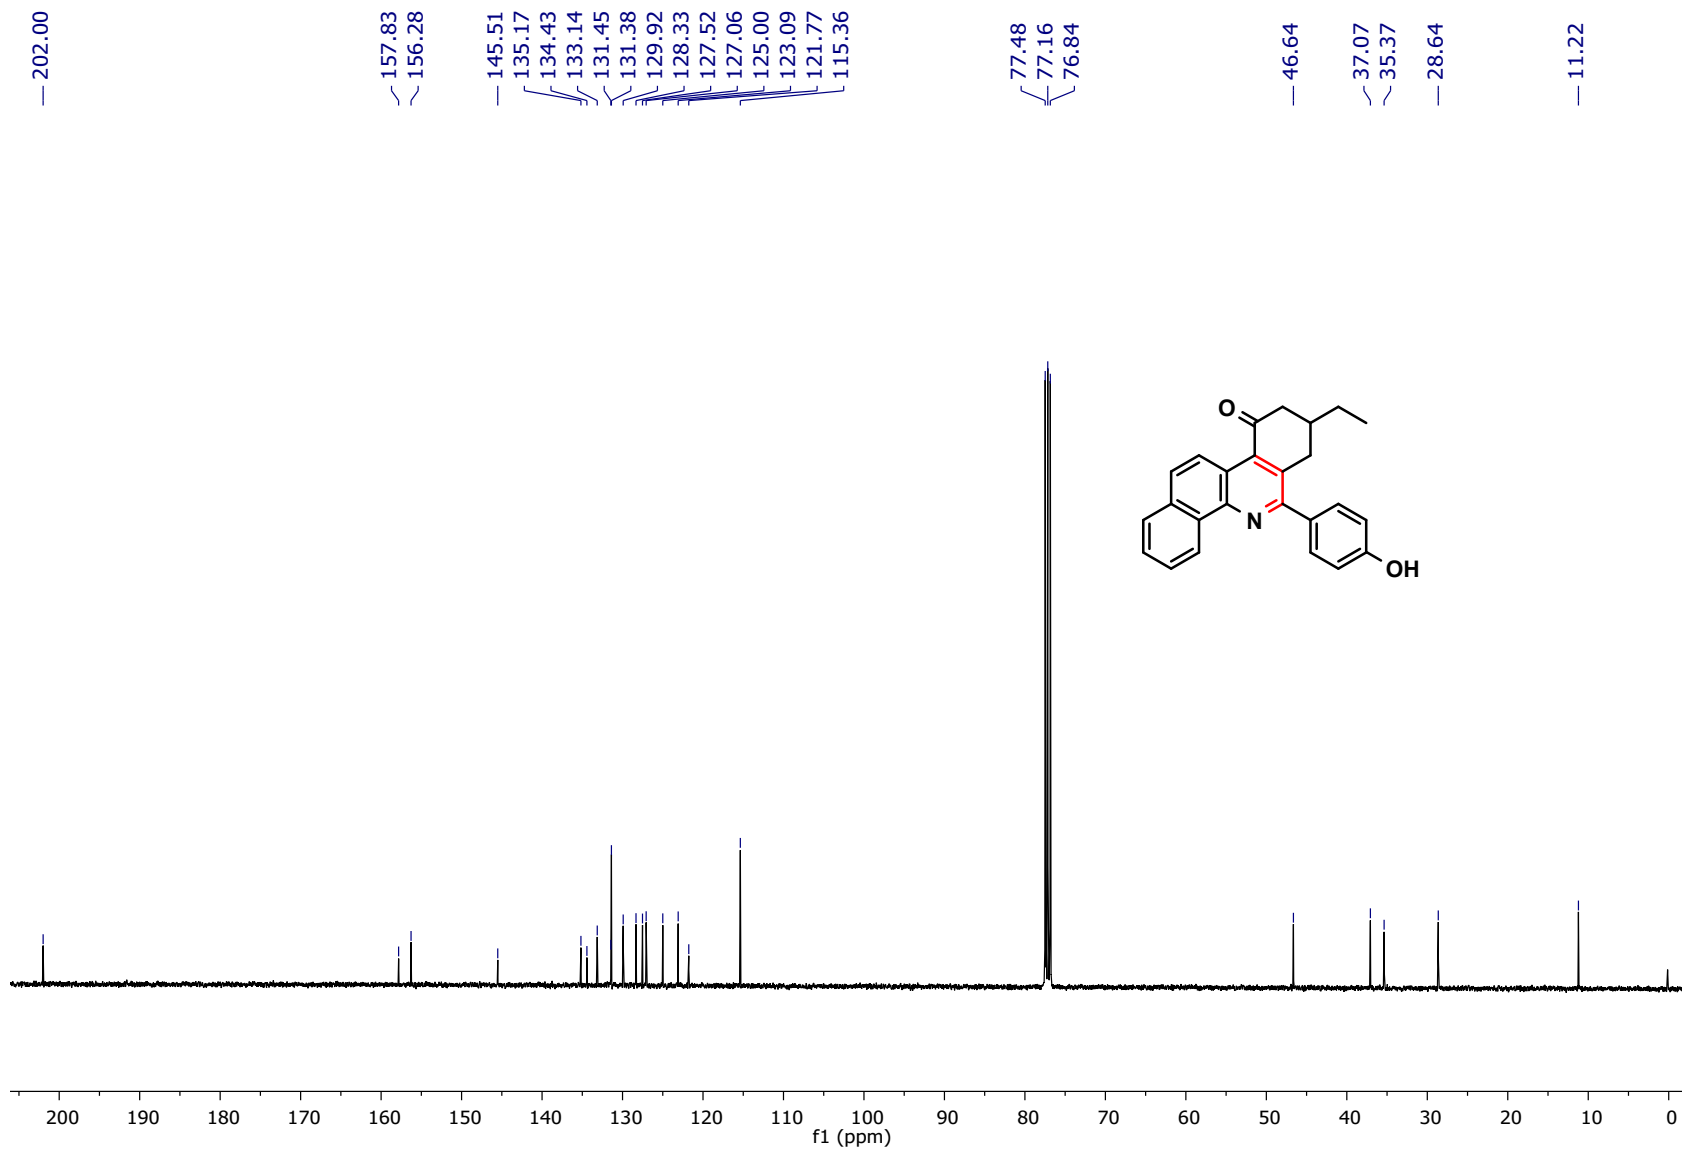

## HRMS Spectrum of Compound 4k

|             |                    |                        |         |                 |                                 |
|-------------|--------------------|------------------------|---------|-----------------|---------------------------------|
| Sample Name | SAMPLE             | Position               | P2-B7   | Instrument Name | Instrument 1                    |
| User Name   |                    | Inj Vol                | 20      | InjPosition     |                                 |
| Sample Type | Sample             | IRM Calibration Status | Success | Data Filename   | ATK-SY-P17.d                    |
| ACQ Method  | ESI ALS 100-1000.m | Comment                |         | Acquired Time   | 23-01-2021 09:25:14 (UTC+05:30) |

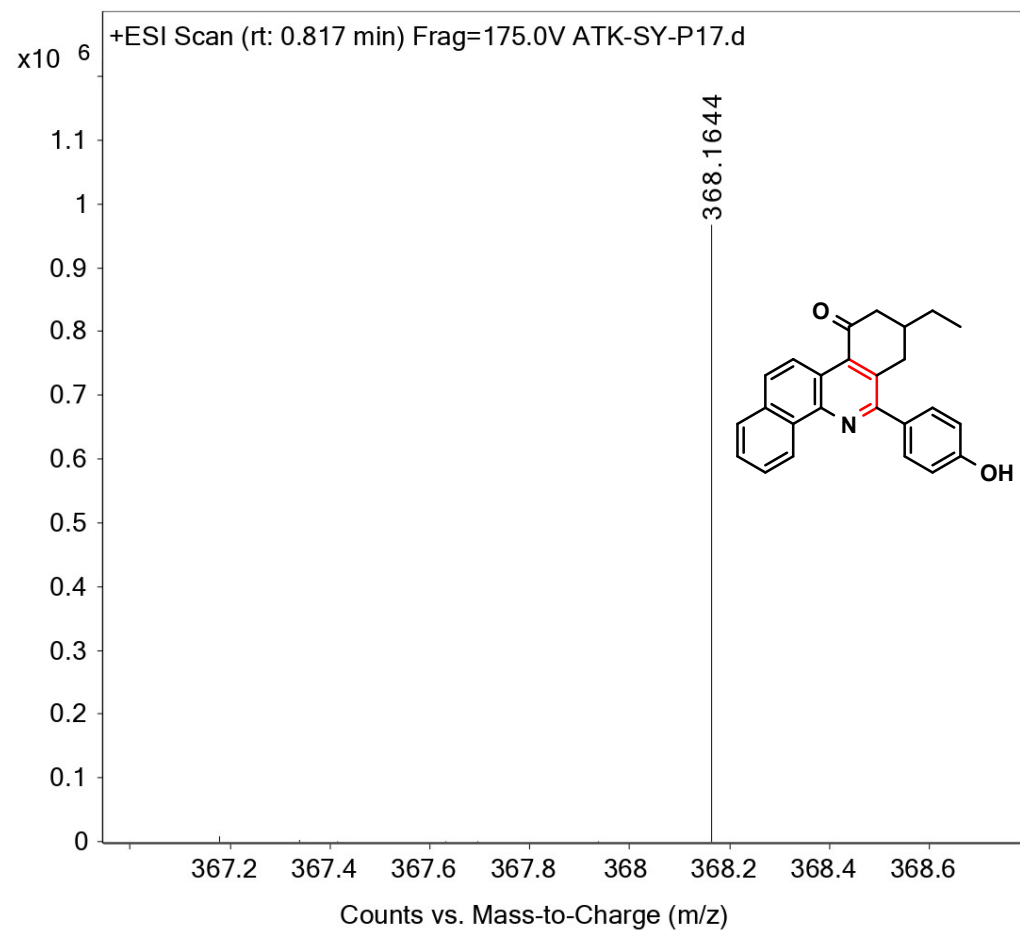

# <sup>1</sup>H NMR Spectrum of Compound 4l

ATK-RA-45-2020-1H.10.fid — ATK-RA-45-2020-1H

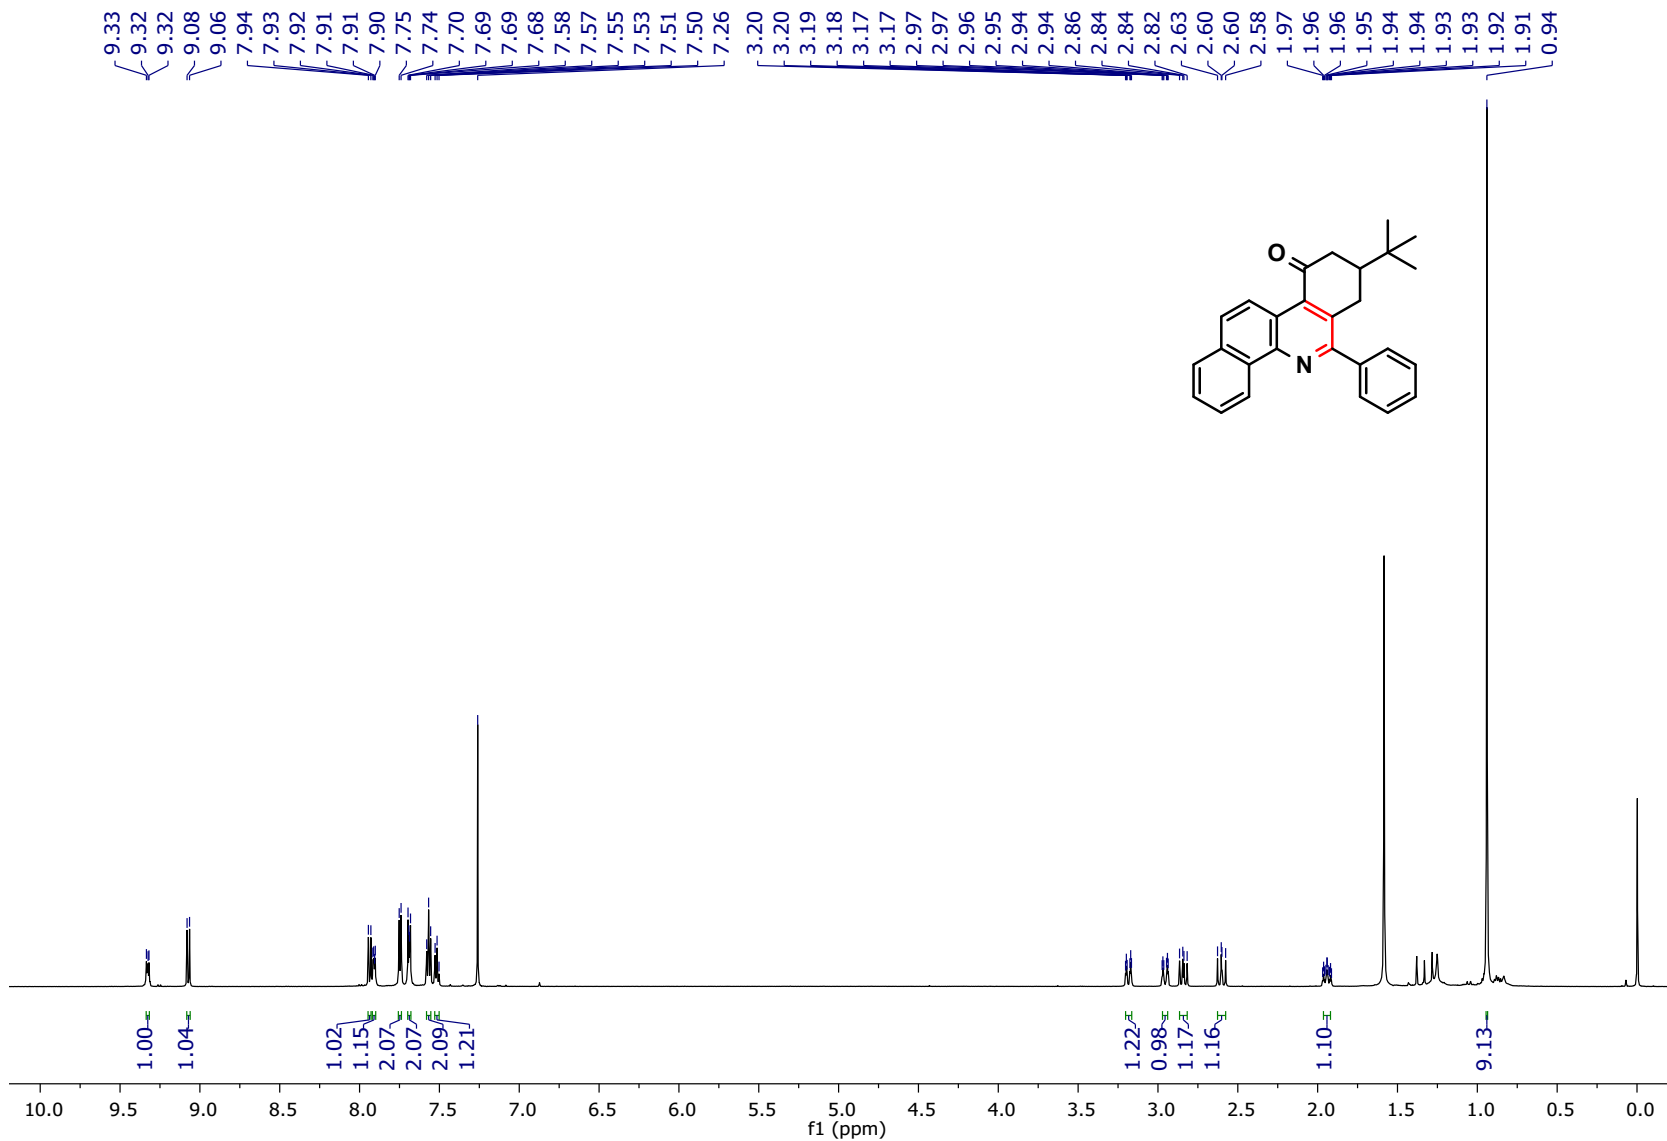

# <sup>13</sup>C NMR Spectrum of Compound 4l

ATK-RA-45-2020-13C — ATK-RA-45-2020-13C —

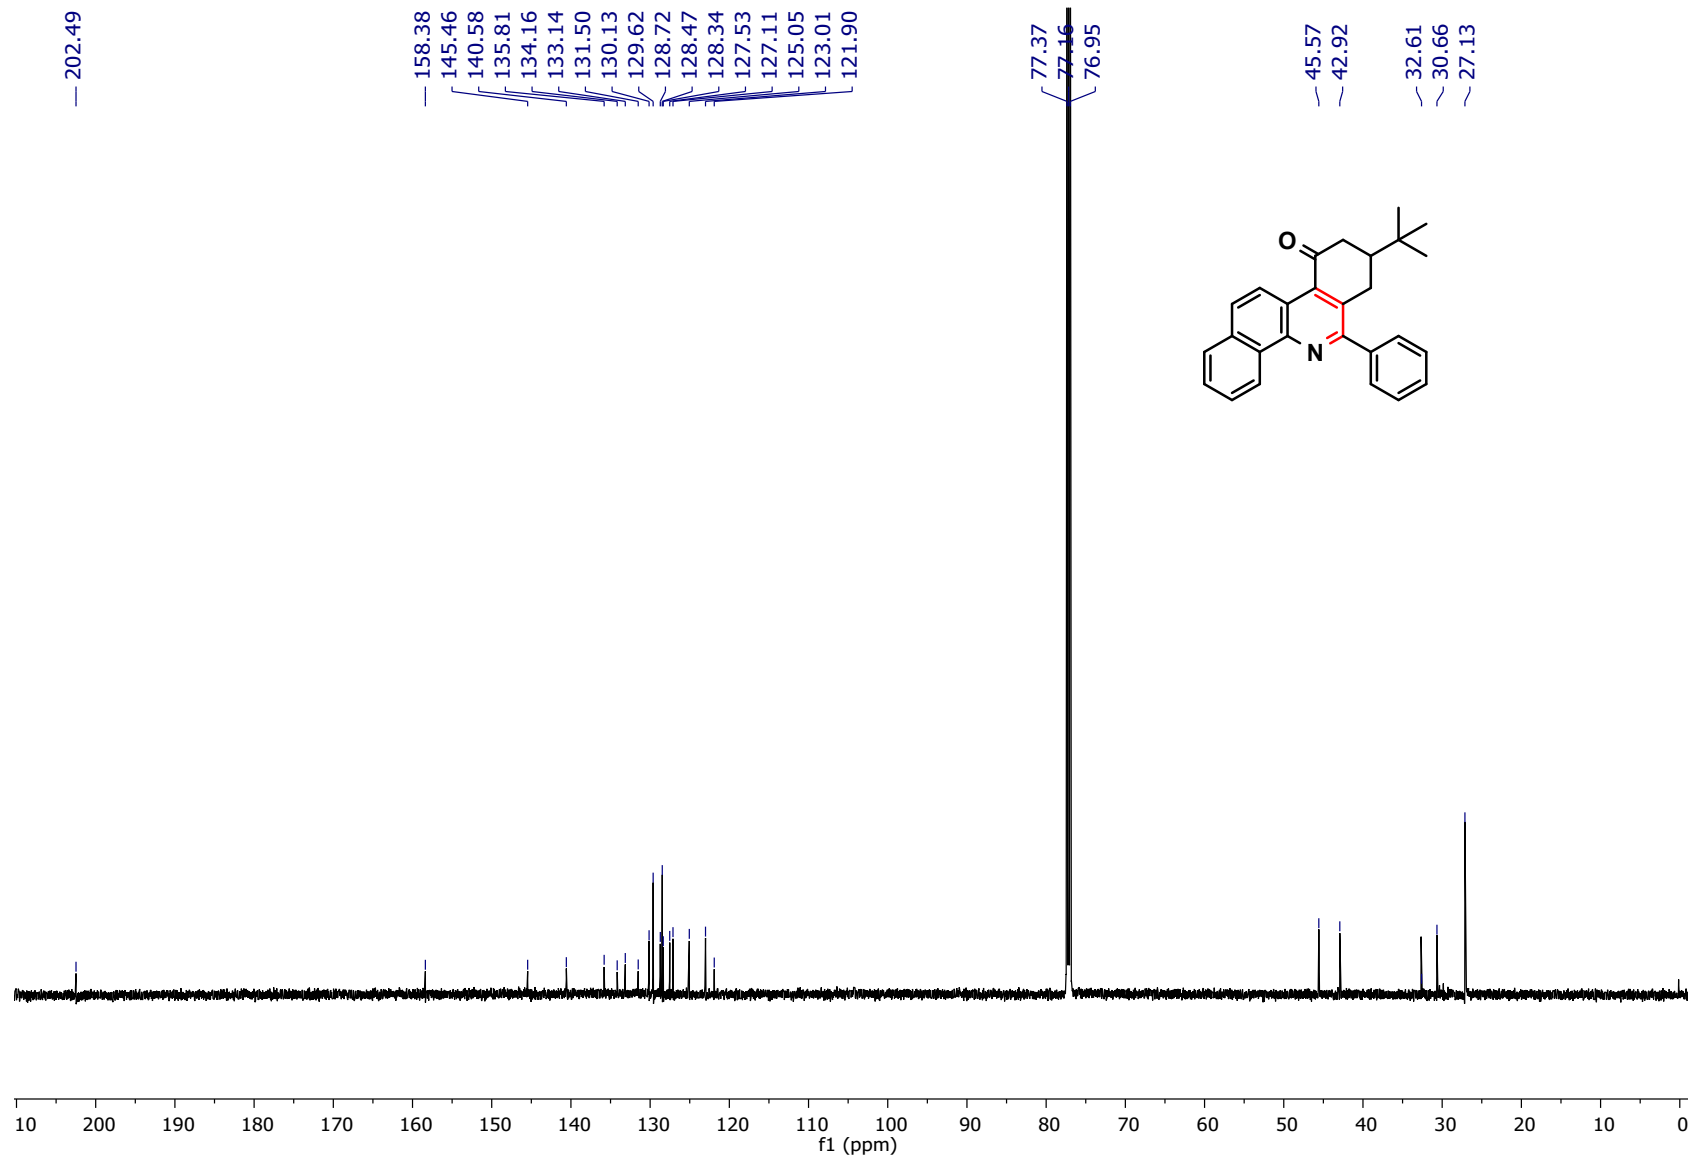



## HRMS Spectrum of Compound 4l

|             |                    |                        |                  |                 |                                   |
|-------------|--------------------|------------------------|------------------|-----------------|-----------------------------------|
| Sample Name | AD-SY-M            | Position               | Vial 25          | Instrument Name | Instrument 1                      |
| User Name   |                    | Inj Vol                | 0.1              | InjPosition     |                                   |
| Sample Type | Sample             | IRM Calibration Status | Some Ions Missed | Data Filename   | AD-SY-M.d                         |
| ACQ Method  | Direct Mass-2017.m | Comment                |                  | Acquired Time   | 28-Mar-22 09:14:42 PM (UTC+05:30) |

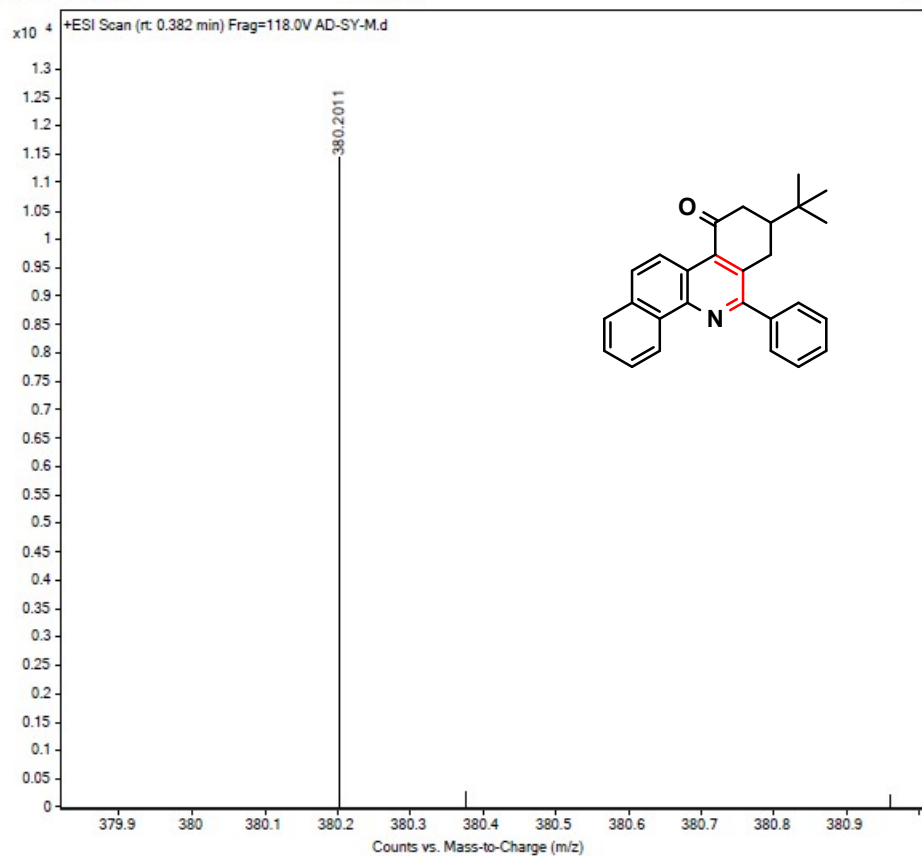

# <sup>1</sup>H NMR Spectrum of Compound 4m

ATK-SY-P41-1H.1.fid — ATK-SY-P41-1H

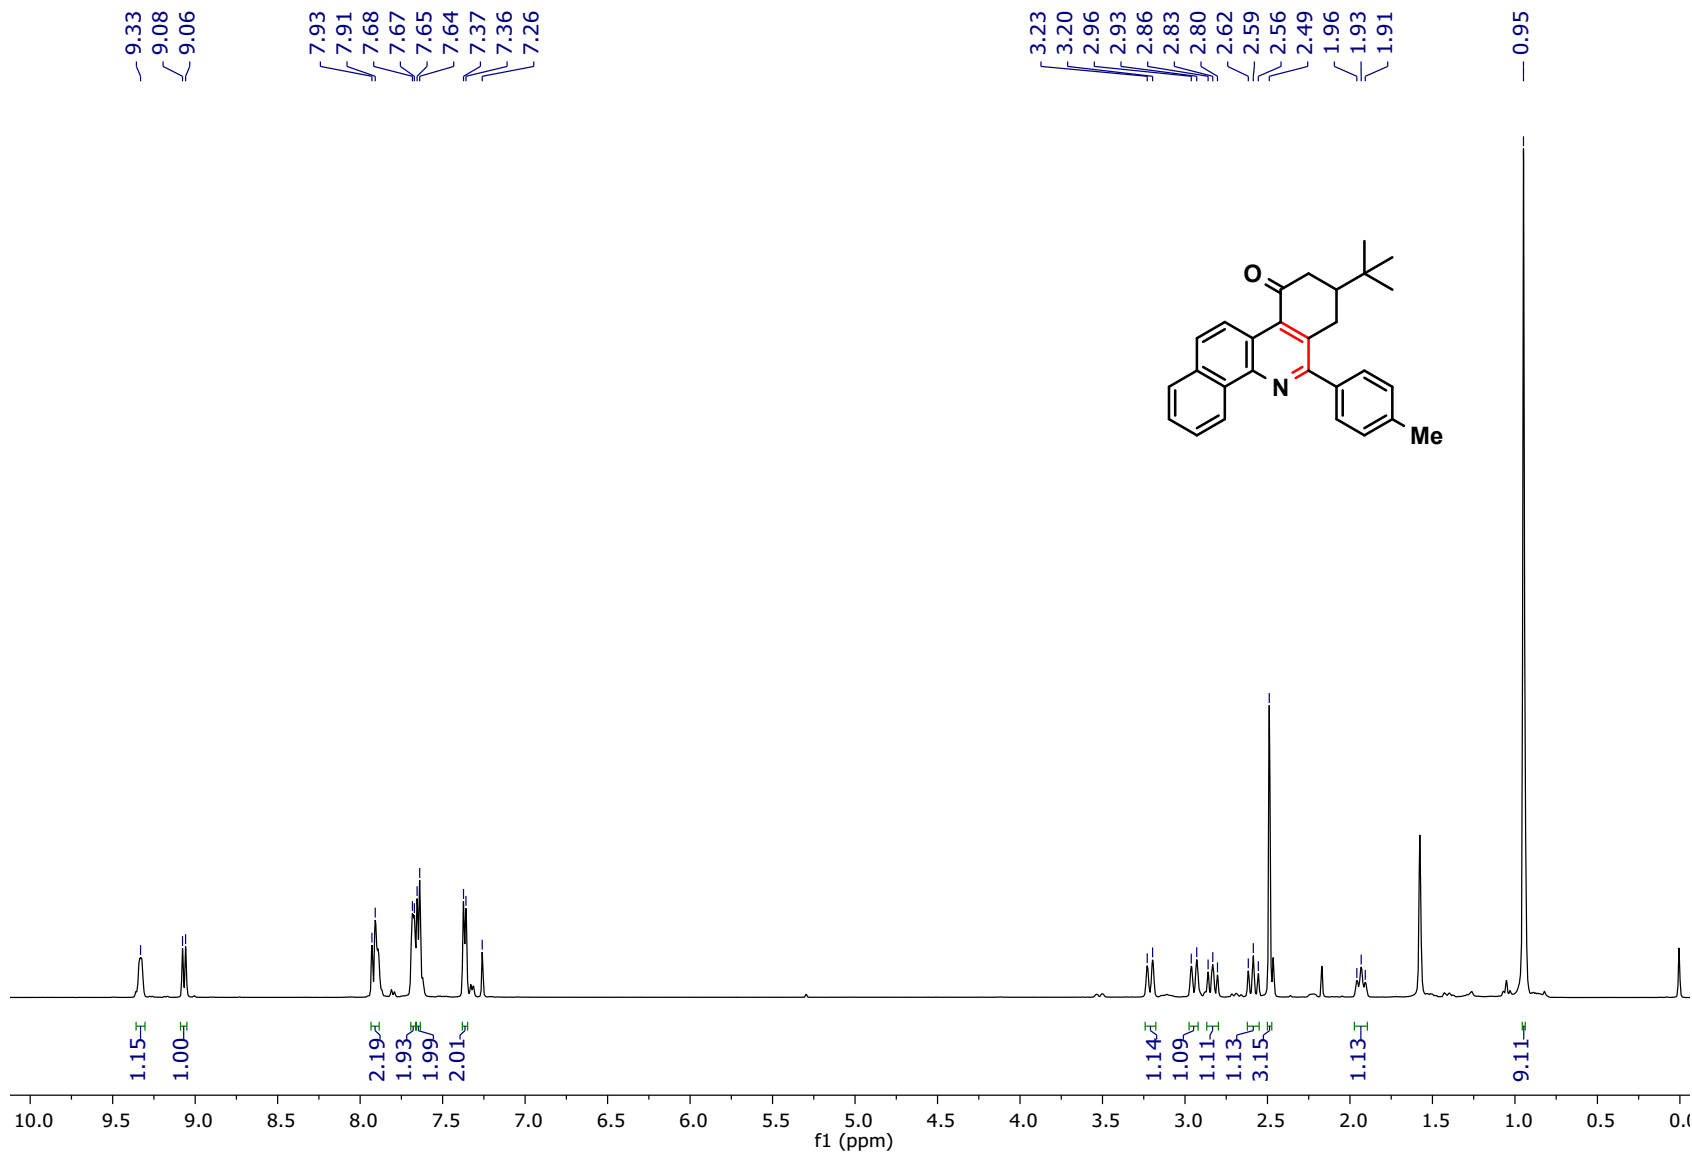

# <sup>13</sup>C NMR Spectrum of Compound 4m

ATK-SY-P41-13C.1.fid — ATK-SY-P41-13C

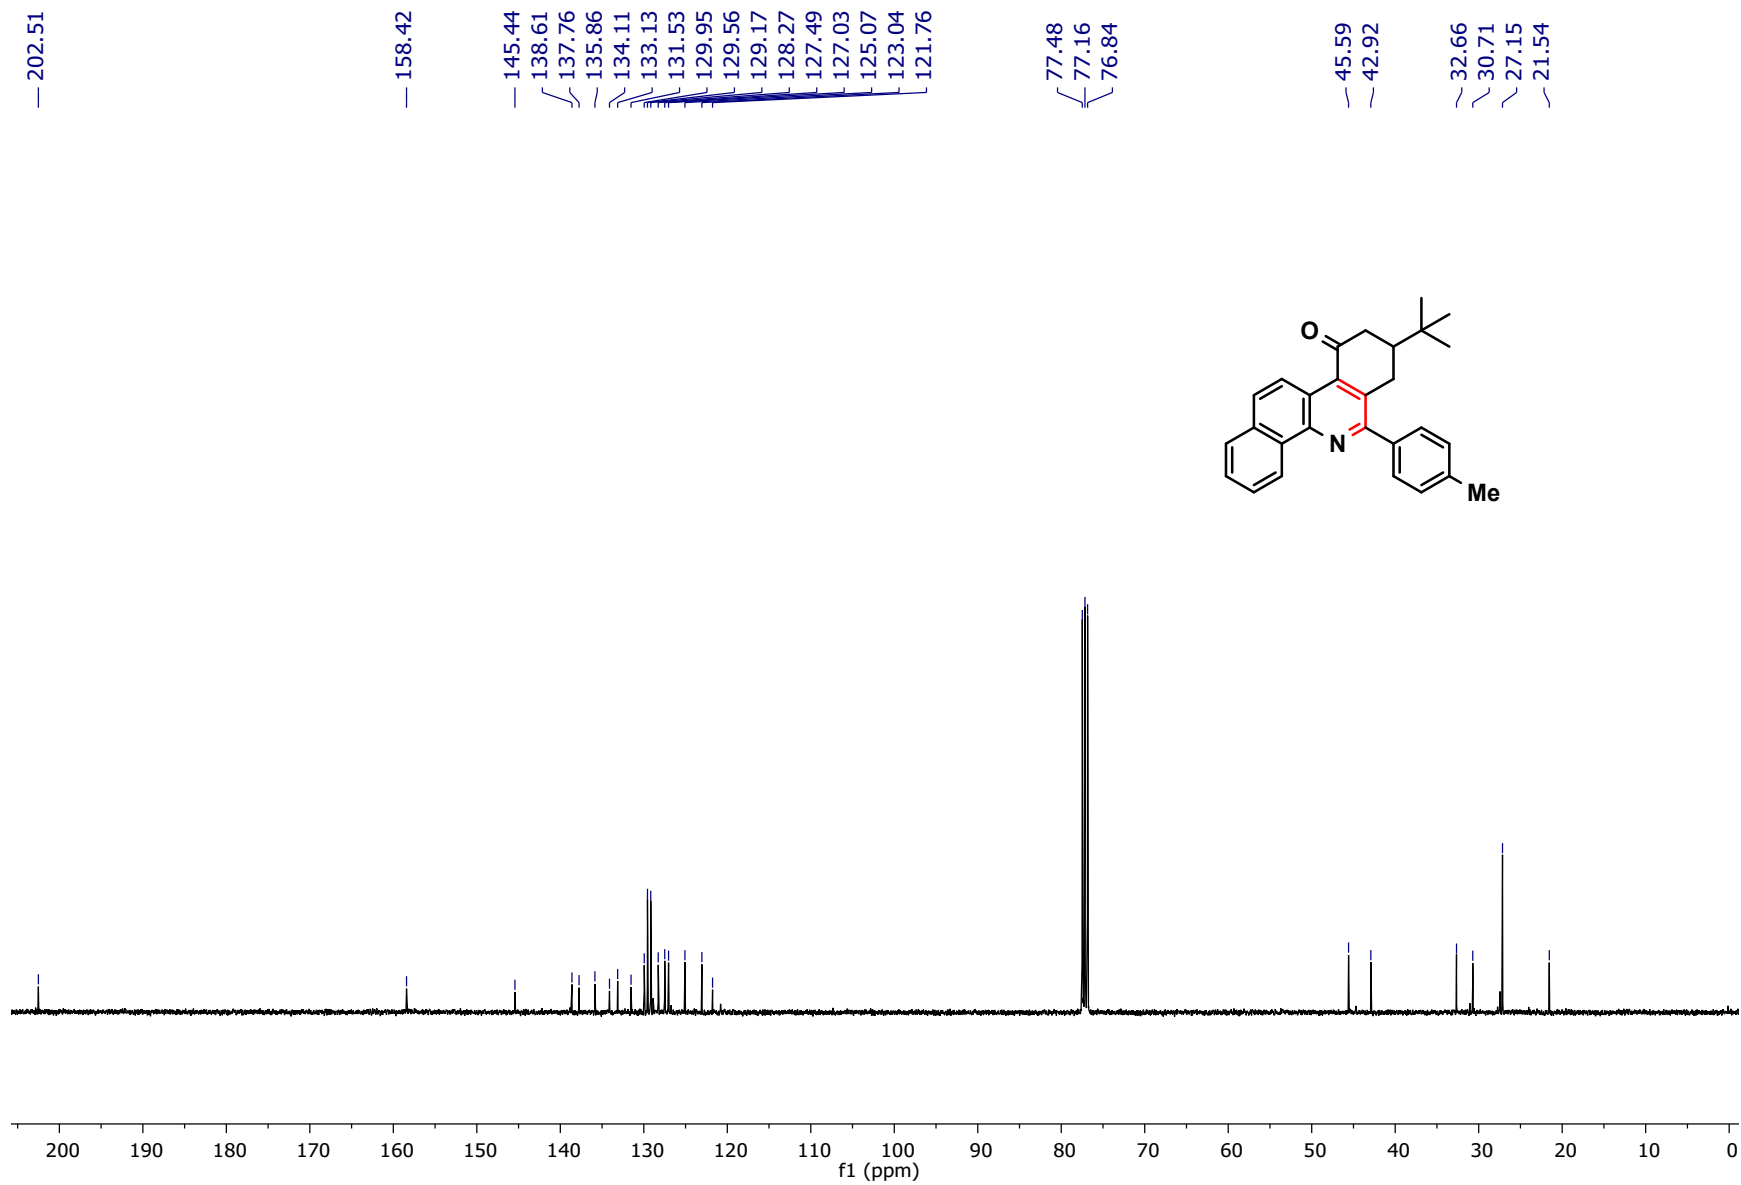

## HRMS Spectrum of compound 4m

|             |                    |                        |         |                 |                                 |
|-------------|--------------------|------------------------|---------|-----------------|---------------------------------|
| Sample Name | SAMPLE             | Position               | P1-E3   | Instrument Name | Instrument 1                    |
| User Name   |                    | Inj Vol                | 20      | InjPosition     |                                 |
| Sample Type | Sample             | IRM Calibration Status | Success | Data Filename   | SY-P41.d                        |
| ACQ Method  | ESI ALS 200-1000.m | Comment                |         | Acquired Time   | 27-02-2021 02:59:31 (UTC+05:30) |

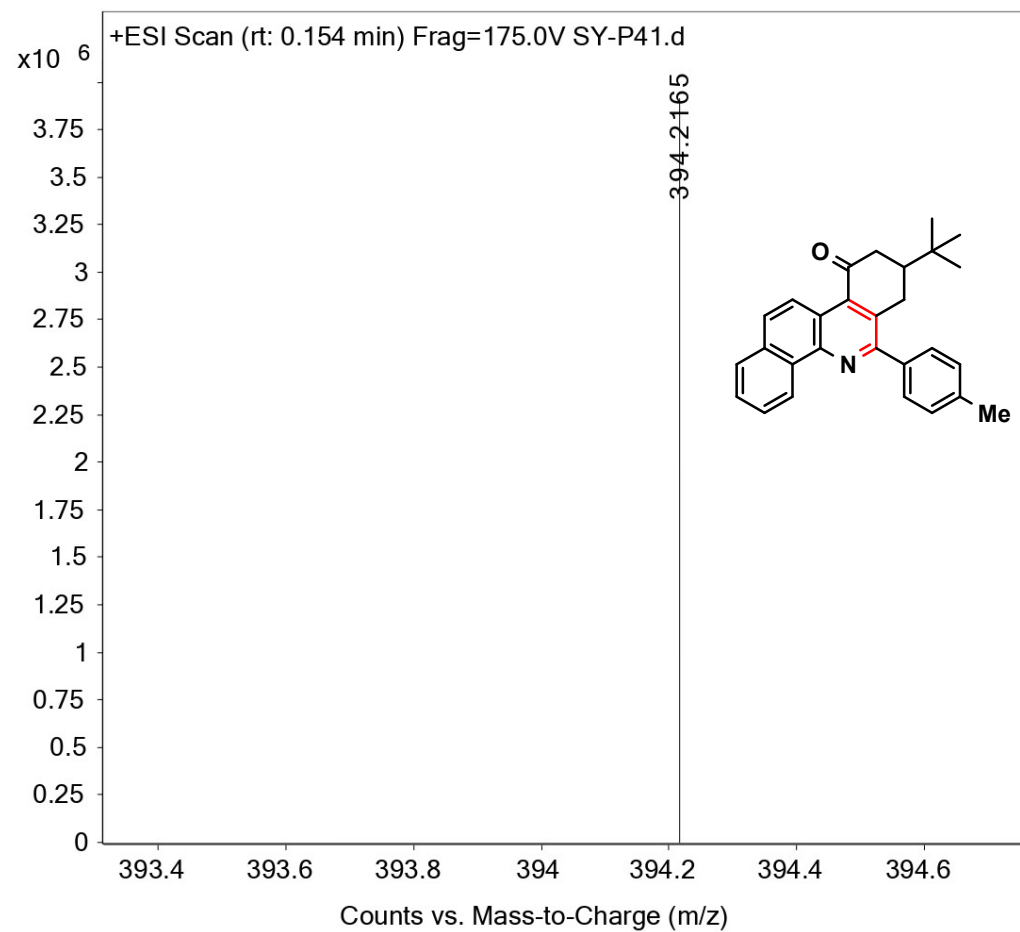

# <sup>1</sup>H NMR Spectrum of Compound 4n

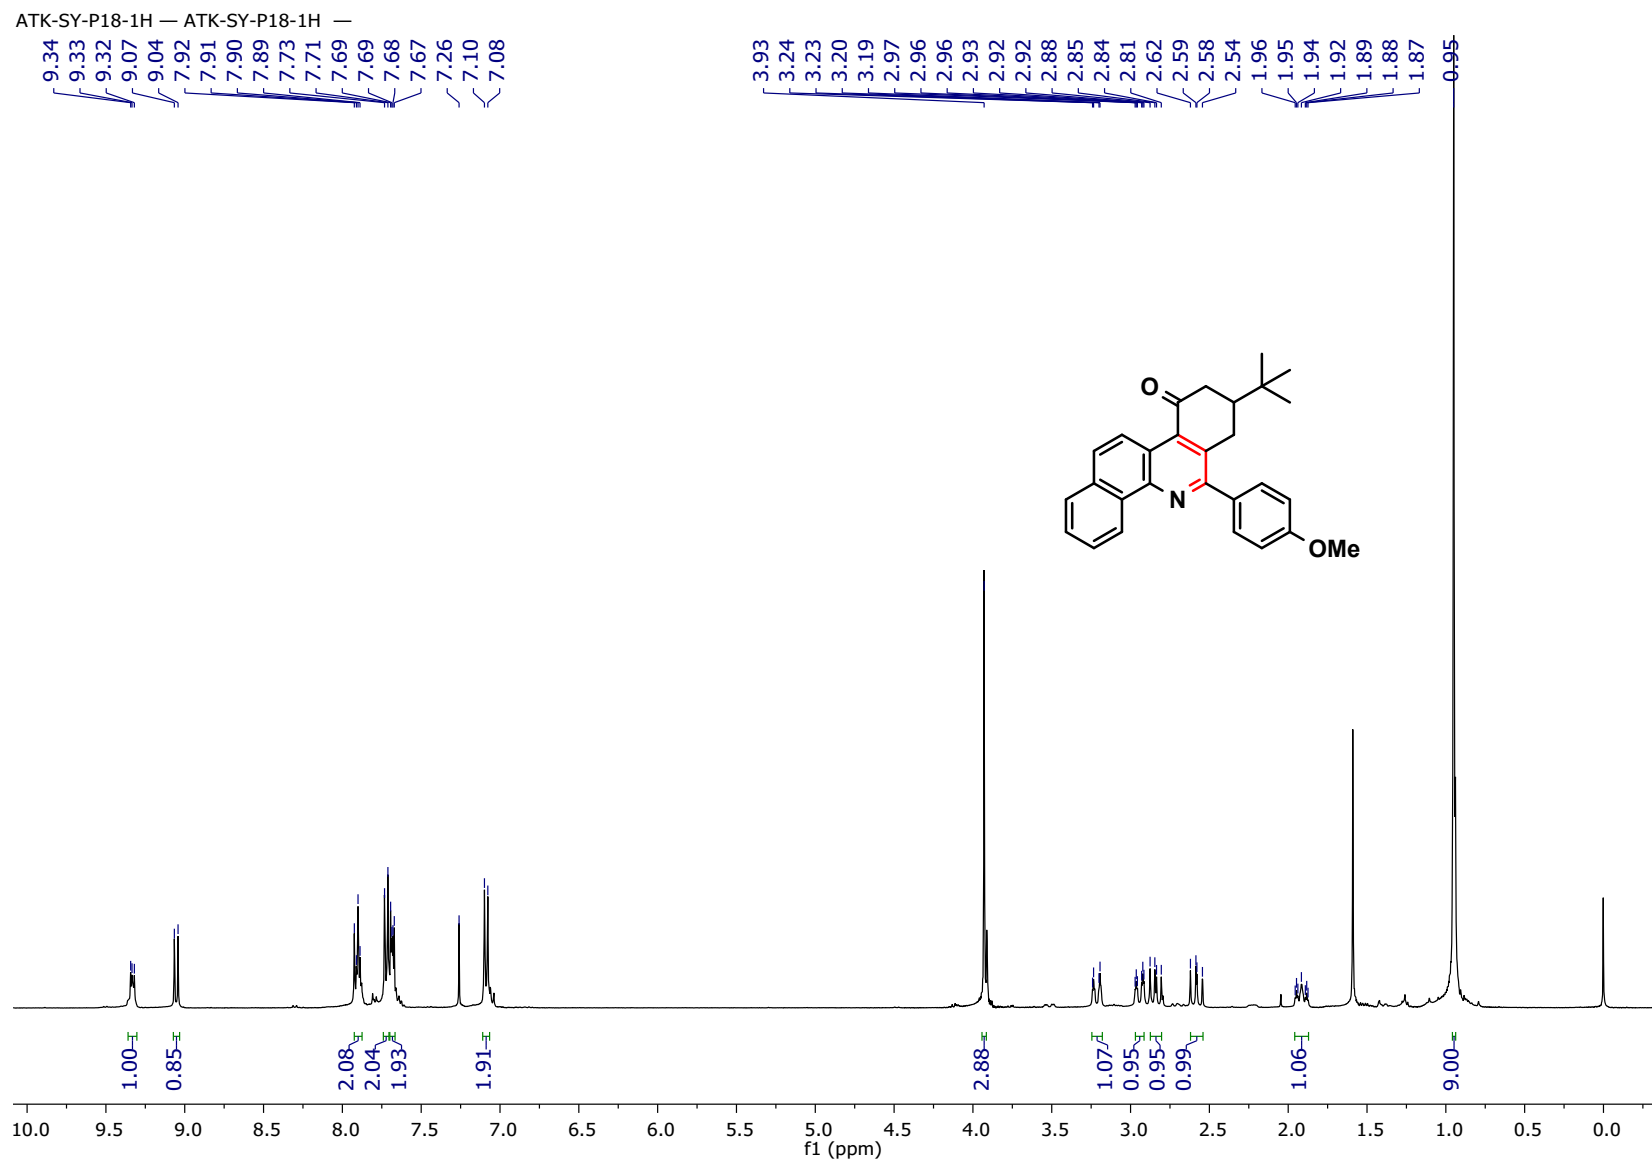

# <sup>13</sup>C NMR Spectrum of Compound 4n

ATK-SY-P-18-13C — ATK-SY-P-18-13C —

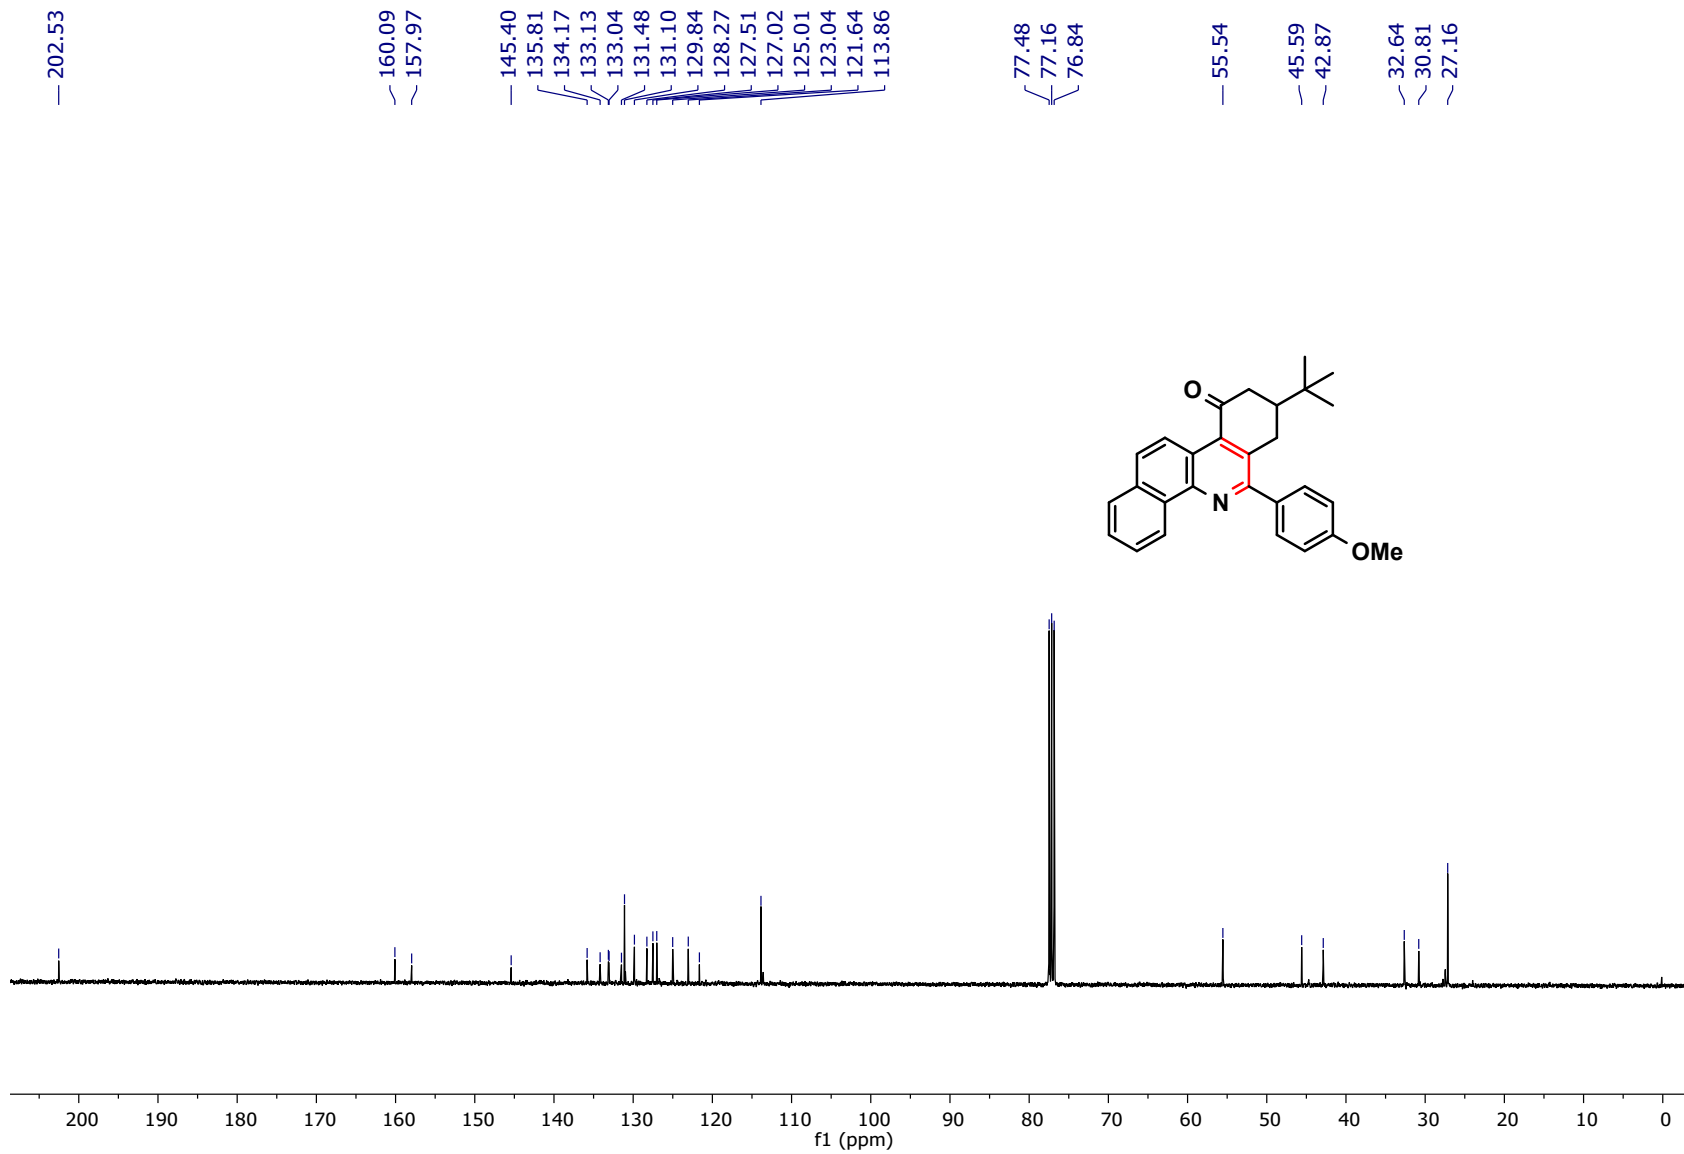

## HRMS Spectrum of compound 4n

|             |                    |                        |         |                 |                                 |
|-------------|--------------------|------------------------|---------|-----------------|---------------------------------|
| Sample Name | SAMPLE 16          | Position               | P2-B7   | Instrument Name | Instrument 1                    |
| User Name   |                    | Inj Vol                | 20      | InjPosition     |                                 |
| Sample Type | Sample             | IRM Calibration Status | Success | Data Filename   | ATK-SY-P18A.d                   |
| ACQ Method  | ESI ALS 100-1000.m | Comment                |         | Acquired Time   | 27-01-2021 22:52:01 (UTC+05:30) |

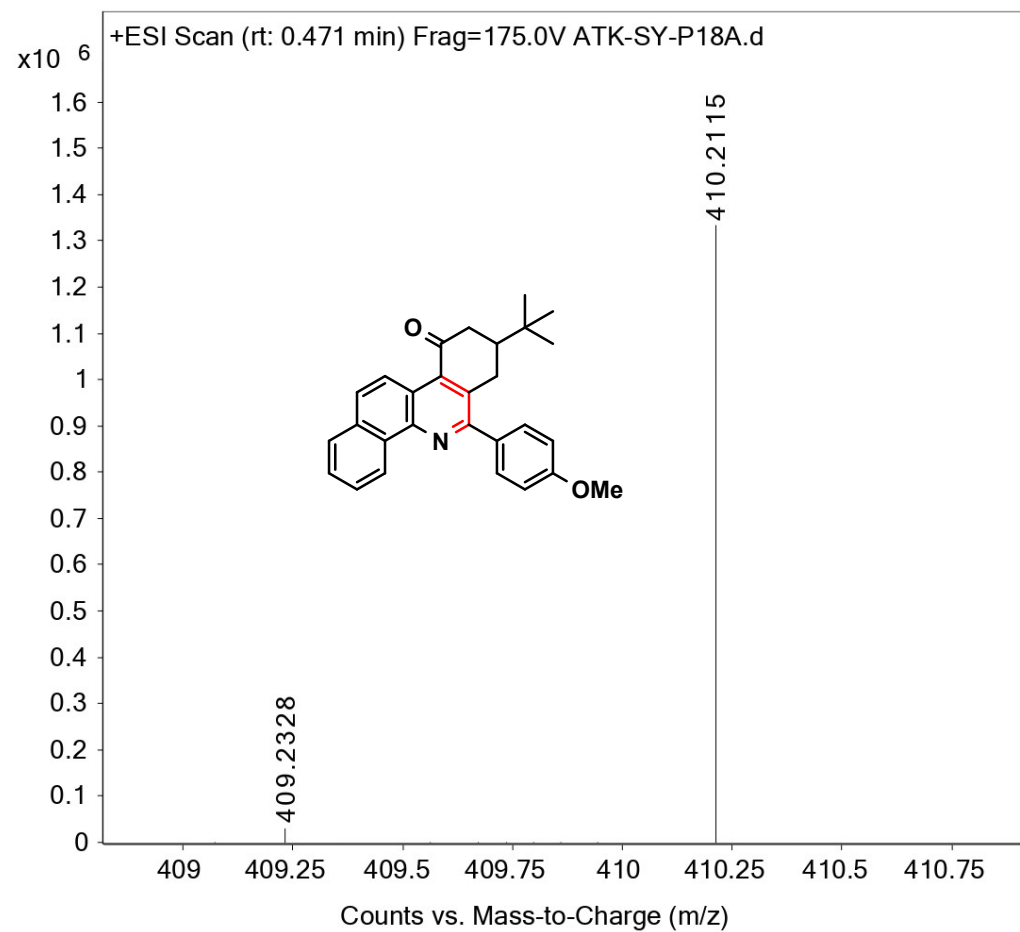

# <sup>1</sup>H NMR Spectrum of Compound 4o

ATK-SY-P39-1H.1.fid — ATK-SY-P39-1H

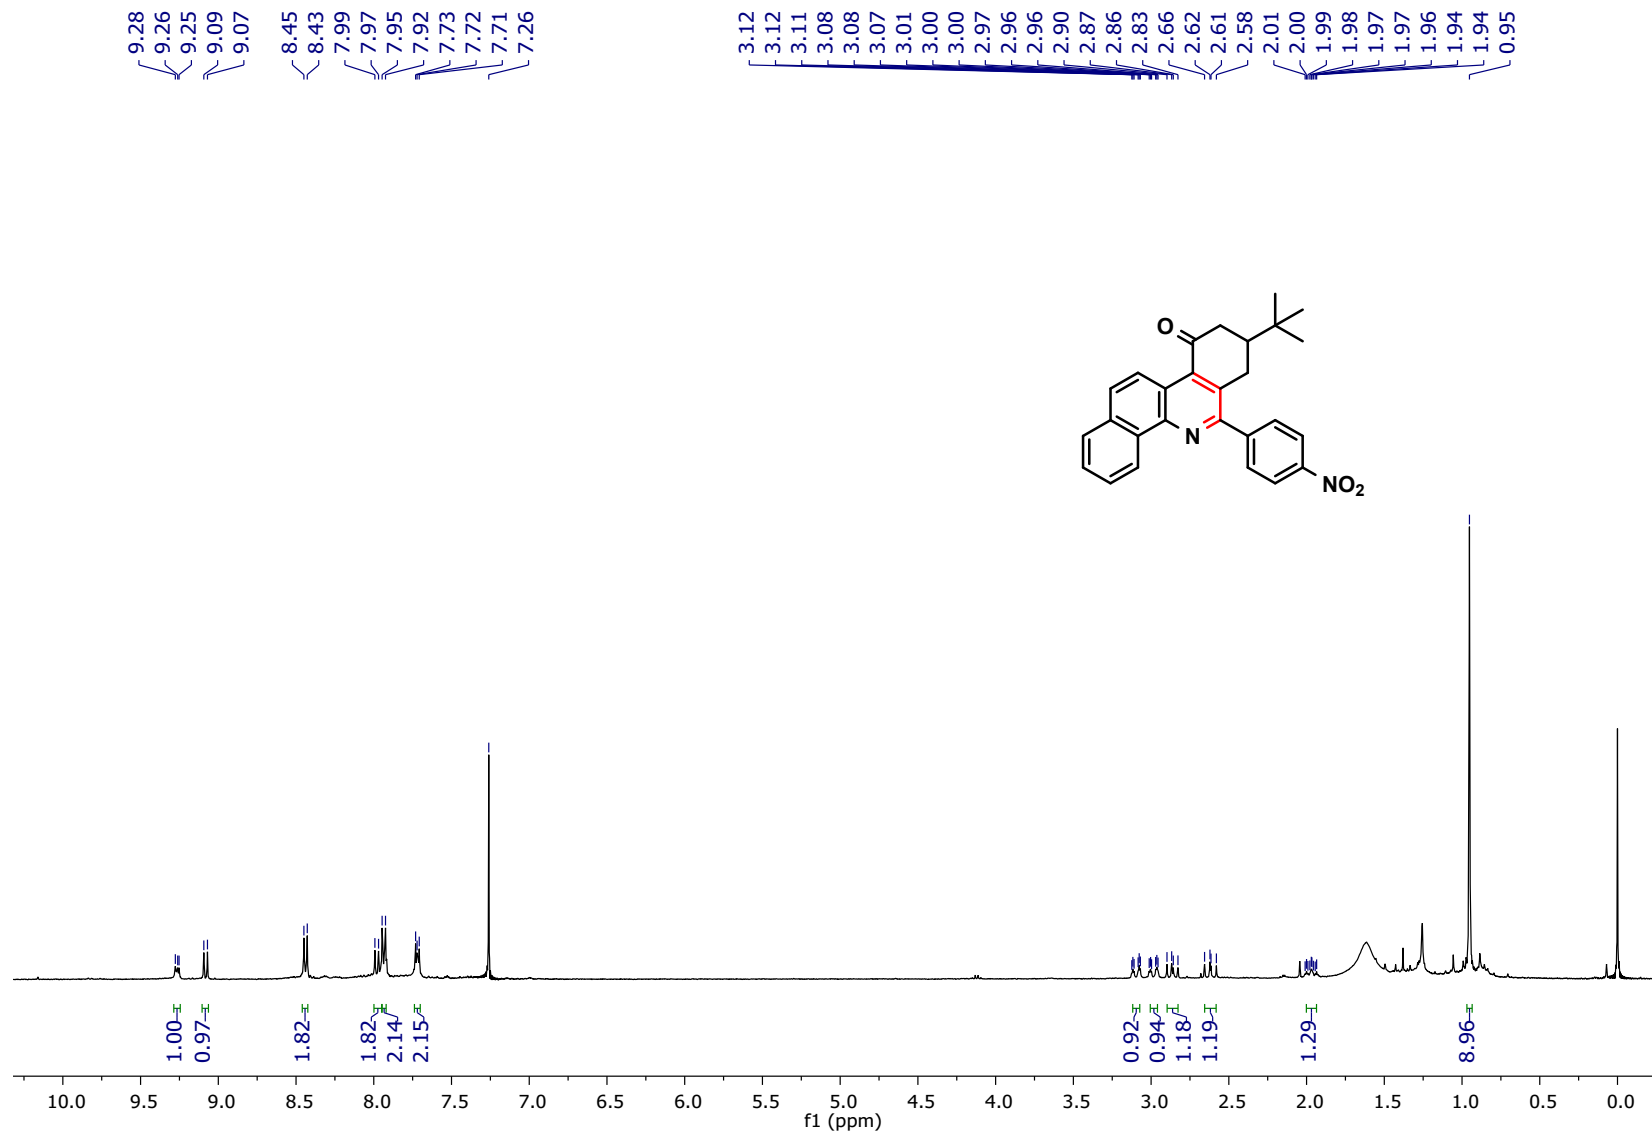



# <sup>13</sup>C NMR Spectrum of Compound 4o

ATK-SY-P39-13C.1.fid — ATK-SY-P39-13C

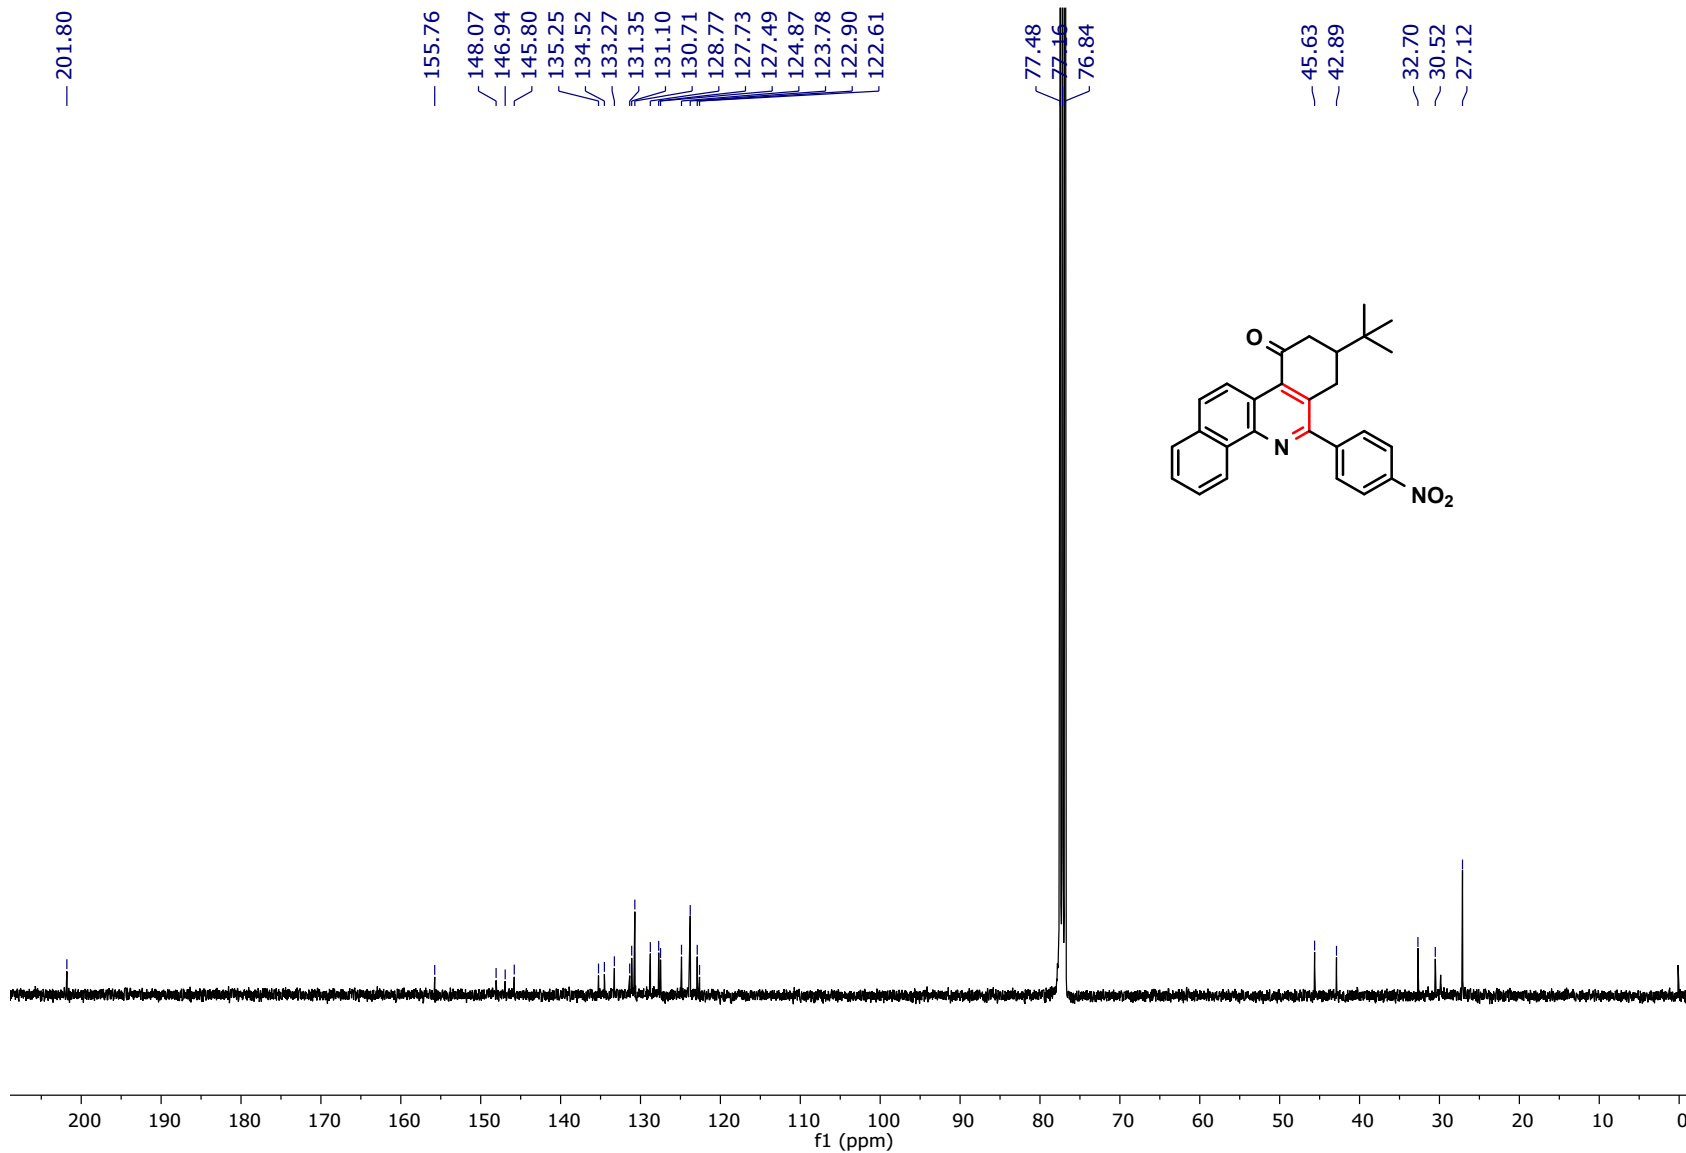

## HRMS Spectrum of Compound 4o

|                    |                    |                               |         |                        |                                 |
|--------------------|--------------------|-------------------------------|---------|------------------------|---------------------------------|
| <b>Sample Name</b> | SAMPLE 19          | <b>Position</b>               | P2-B4   | <b>Instrument Name</b> | Instrument 1                    |
| <b>User Name</b>   |                    | <b>Inj Vol</b>                | 20      | <b>InjPosition</b>     |                                 |
| <b>Sample Type</b> | Sample             | <b>IRM Calibration Status</b> | Success | <b>Data Filename</b>   | SY-P39.d                        |
| <b>ACQ Method</b>  | ESI ALS 100-1000.m | <b>Comment</b>                |         | <b>Acquired Time</b>   | 22-02-2021 18:53:44 (UTC+05:30) |

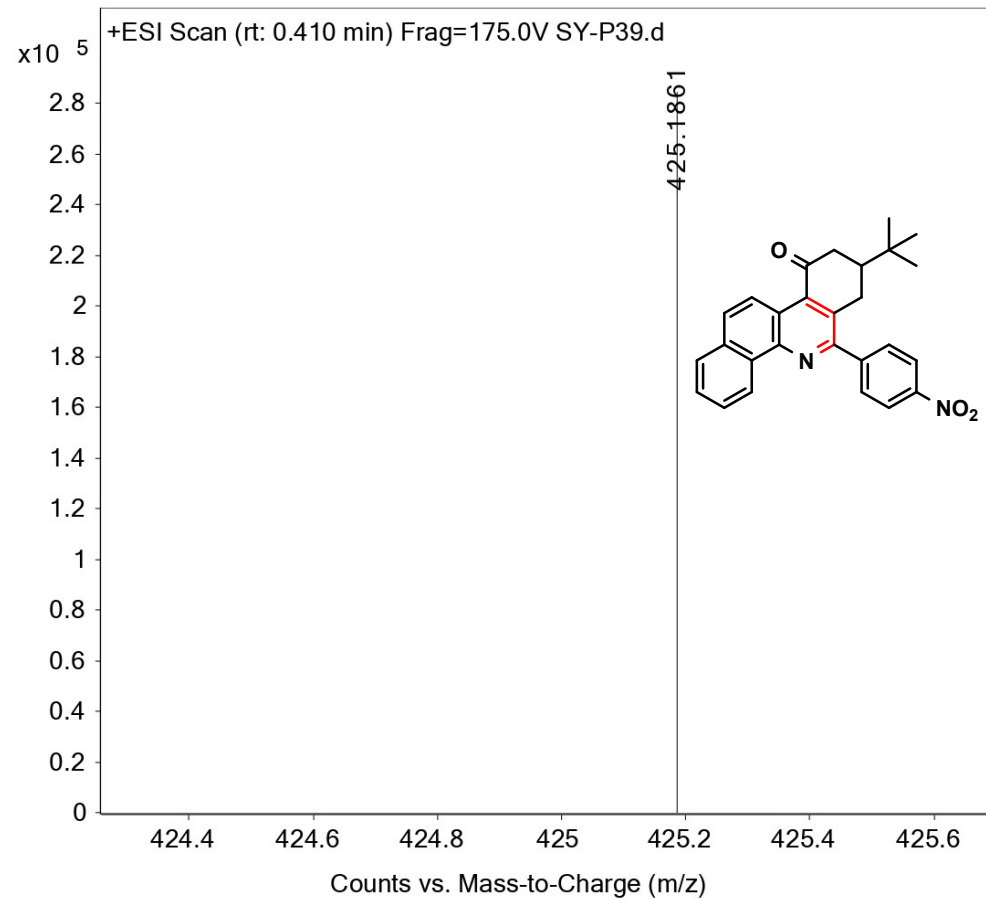

# <sup>1</sup>H NMR Spectrum of Compound 4p

ATK-SY-P42-1H.1.fid — ATK-SY-P42-1H

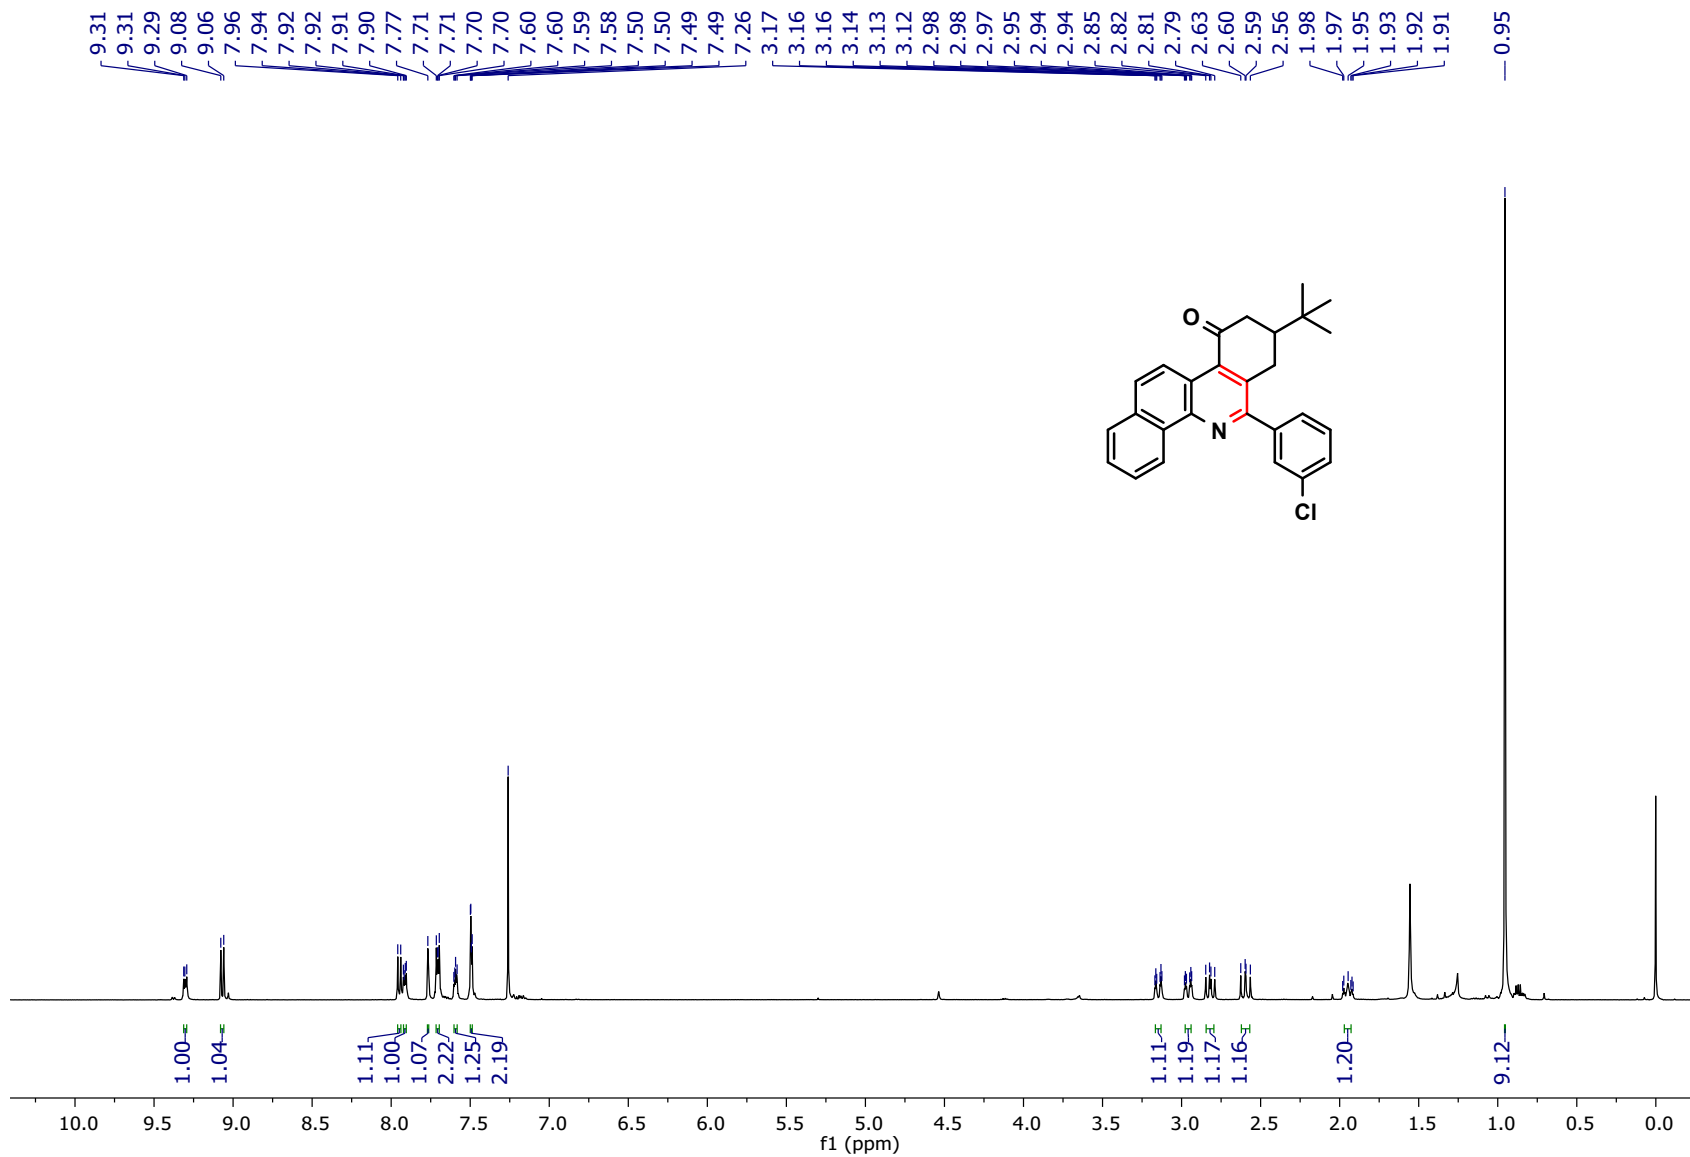

# <sup>13</sup>C NMR Spectrum of Compound 4p

ATK-SY-P42-13C.1.fid — ATK-SY-P42-13C

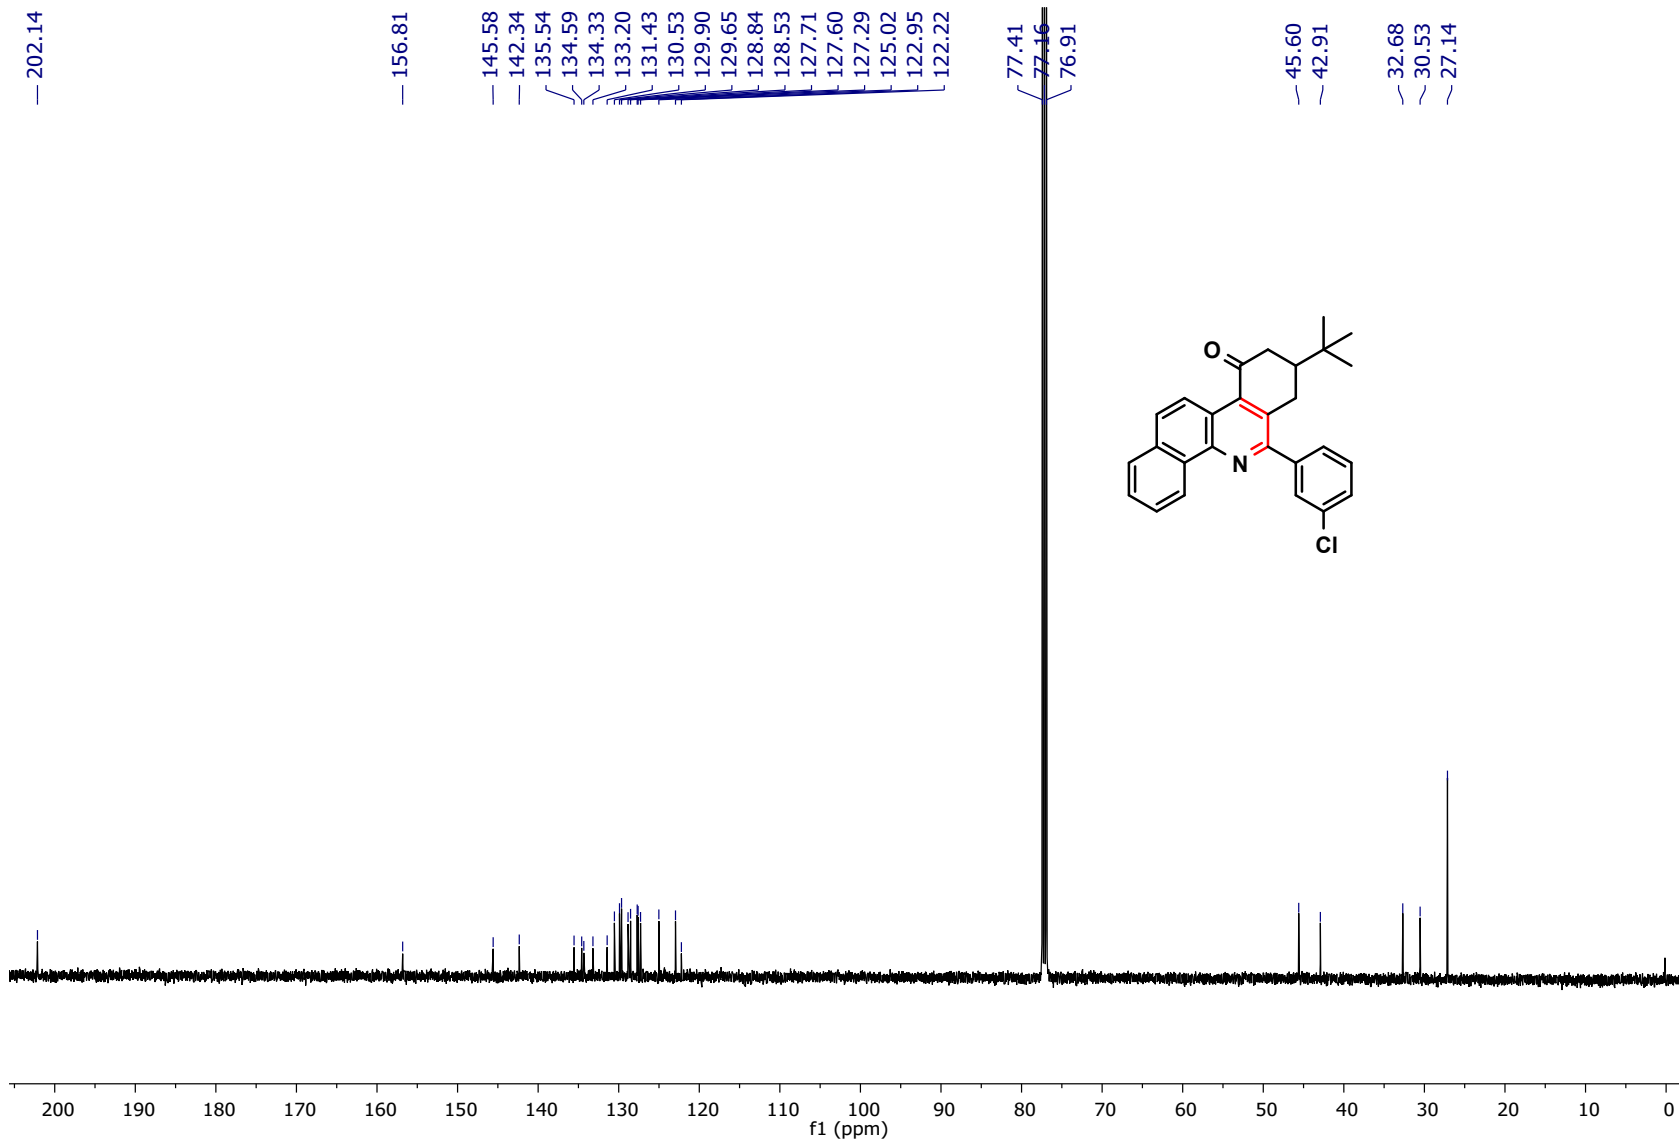

# HRMS Spectrum of Compound 4p

|             |                    |                        |         |                 |                                 |
|-------------|--------------------|------------------------|---------|-----------------|---------------------------------|
| Sample Name | SAMPLE 18          | Position               | P2-B3   | Instrument Name | Instrument 1                    |
| User Name   |                    | Inj Vol                | 20      | InjPosition     |                                 |
| Sample Type | Sample             | IRM Calibration Status | Success | Data Filename   | SY-P42.d                        |
| ACQ Method  | ESI ALS 100-1000.m | Comment                |         | Acquired Time   | 22-02-2021 18:42:54 (UTC+05:30) |

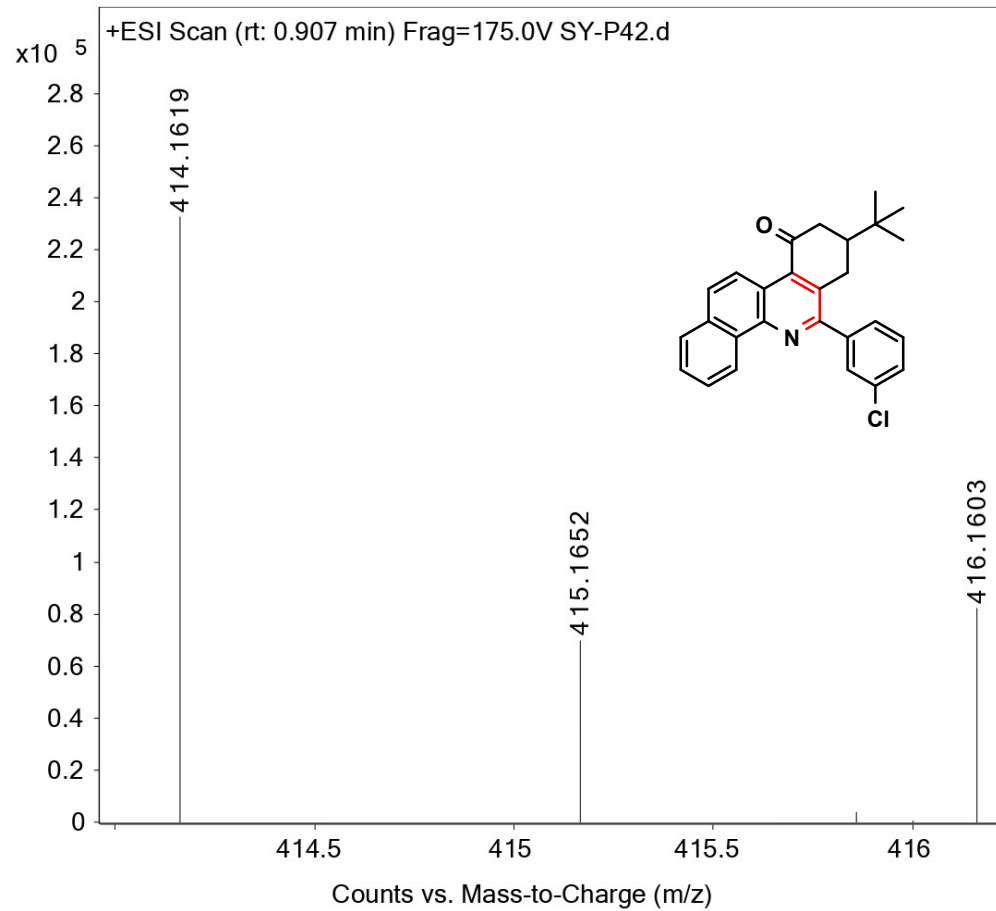

# <sup>1</sup>H NMR Spectrum of Compound 4q

ATK-SY-P4-1H — 1H —

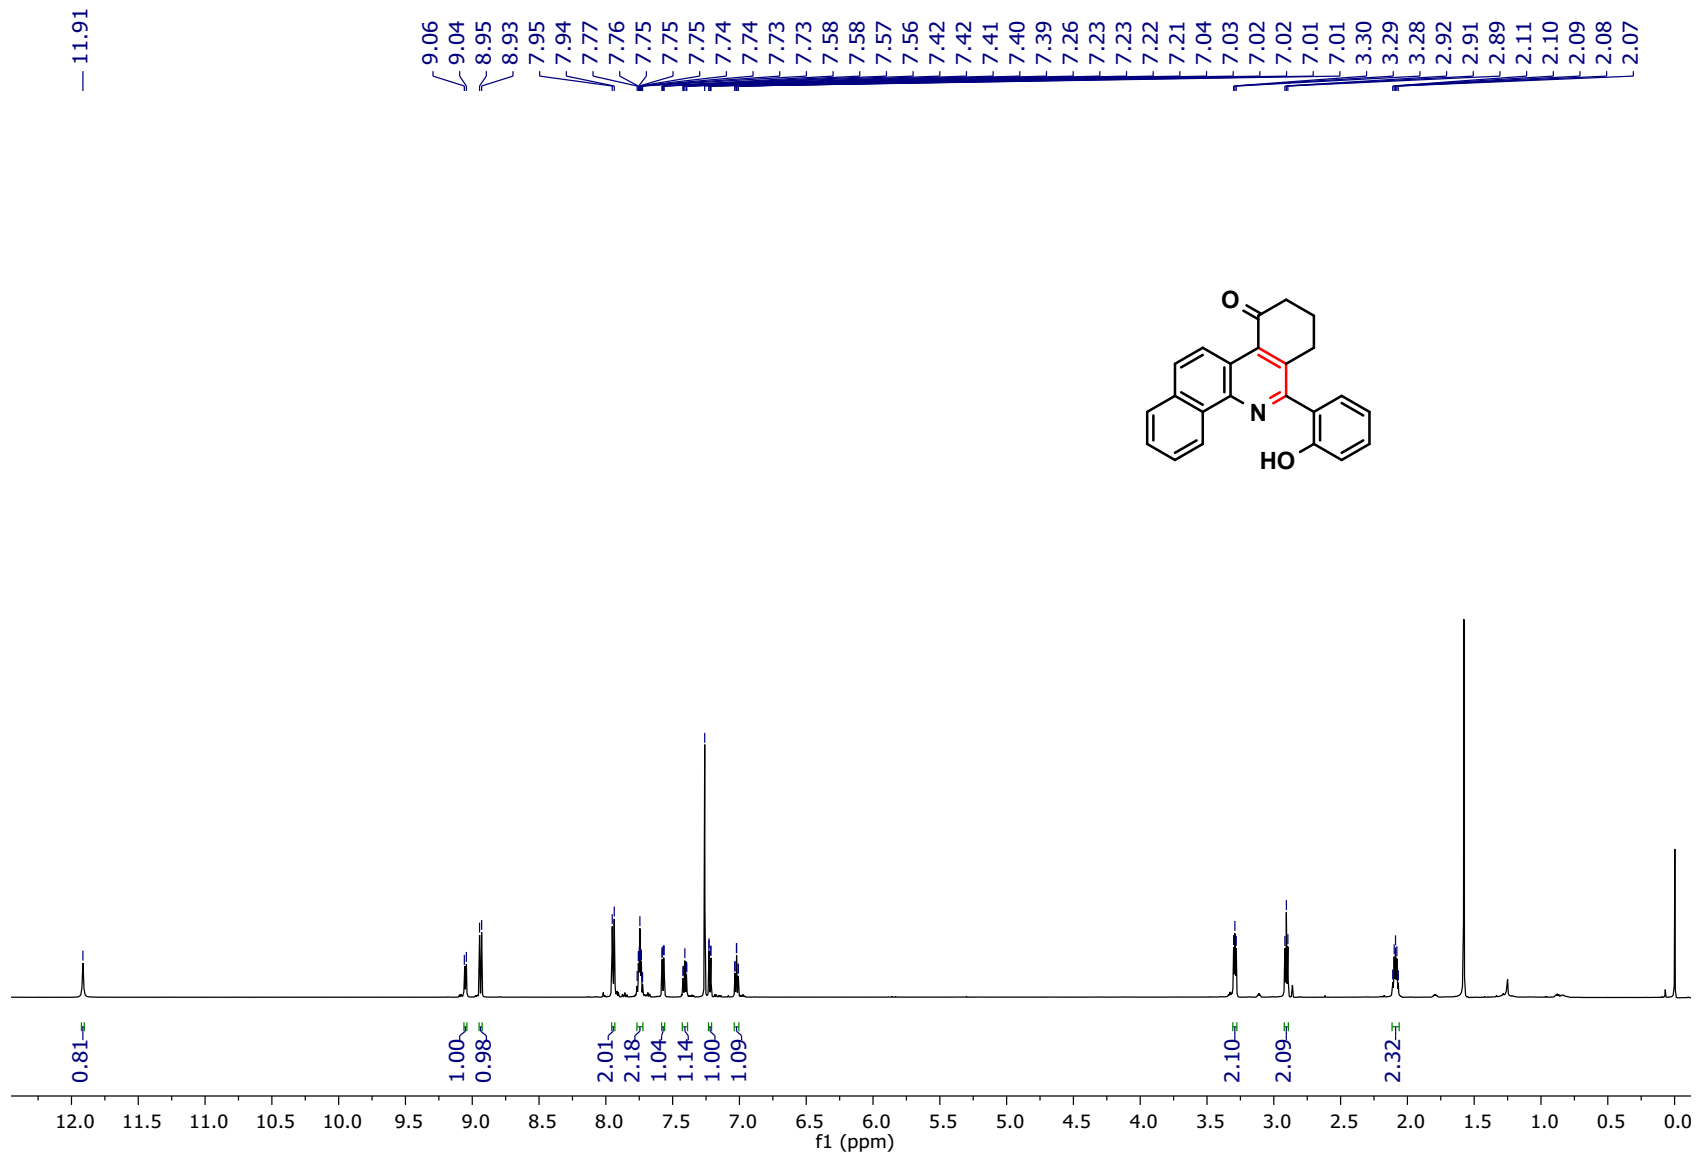

# <sup>13</sup>C NMR Spectrum of Compound 4q

ATK-SY-P4-13C — 13C —

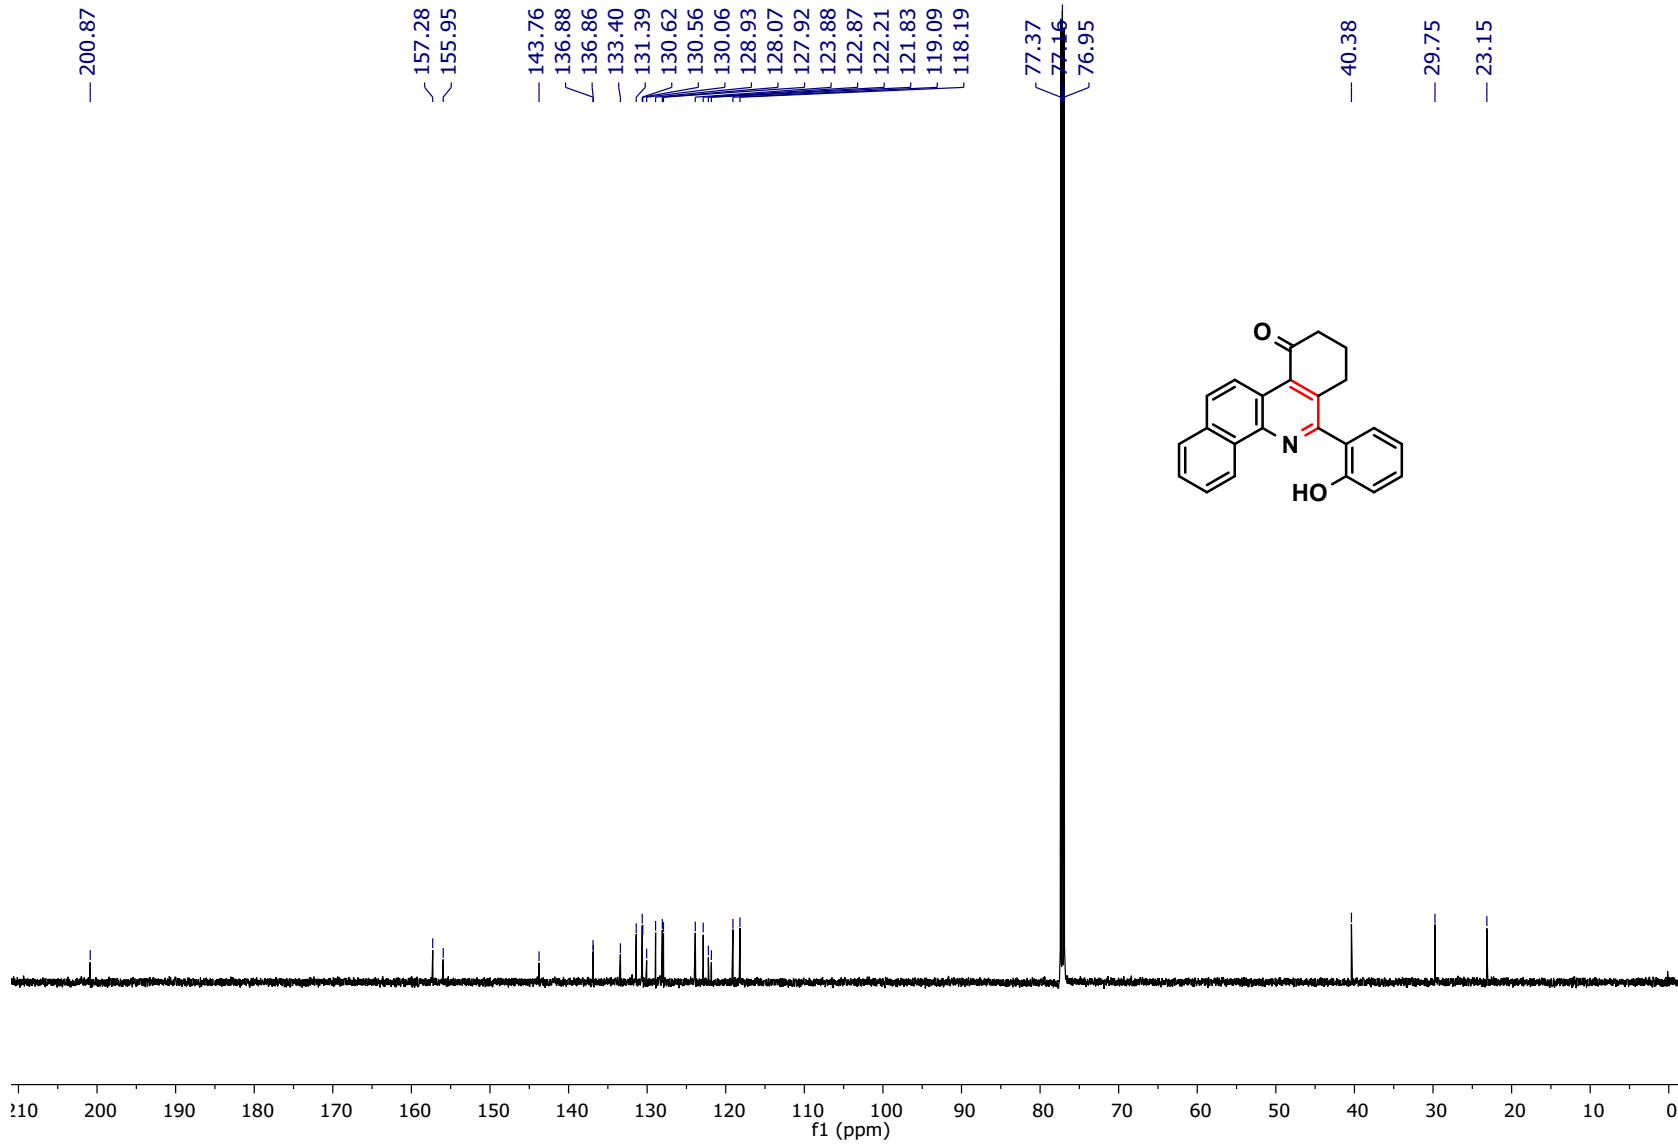

## HRMS Spectrum of Compound 4q

|                    |                   |                               |         |                        |                                 |
|--------------------|-------------------|-------------------------------|---------|------------------------|---------------------------------|
| <b>Sample Name</b> | SAMPLE 19         | <b>Position</b>               | P2-B10  | <b>Instrument Name</b> | Instrument 1                    |
| <b>User Name</b>   |                   | <b>Inj Vol</b>                | 20      | <b>InjPosition</b>     |                                 |
| <b>Sample Type</b> | Sample            | <b>IRM Calibration Status</b> | Success | <b>Data Filename</b>   | ATK-SY-P4.d                     |
| <b>ACQ Method</b>  | ESI ALS 100-500.m | <b>Comment</b>                |         | <b>Acquired Time</b>   | 14-12-2020 16:40:14 (UTC+05:30) |

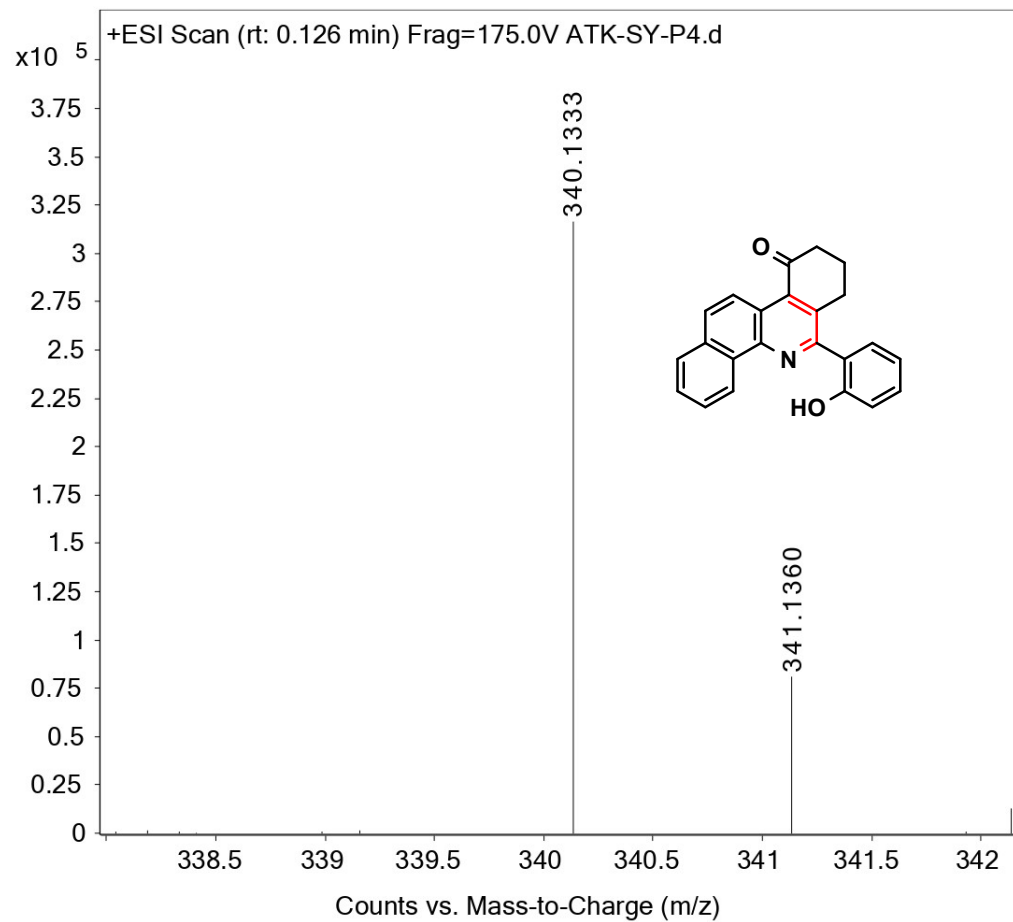



# <sup>1</sup>H NMR Spectrum of Compound 4r

ATK-SY-160320-1H — 1H —

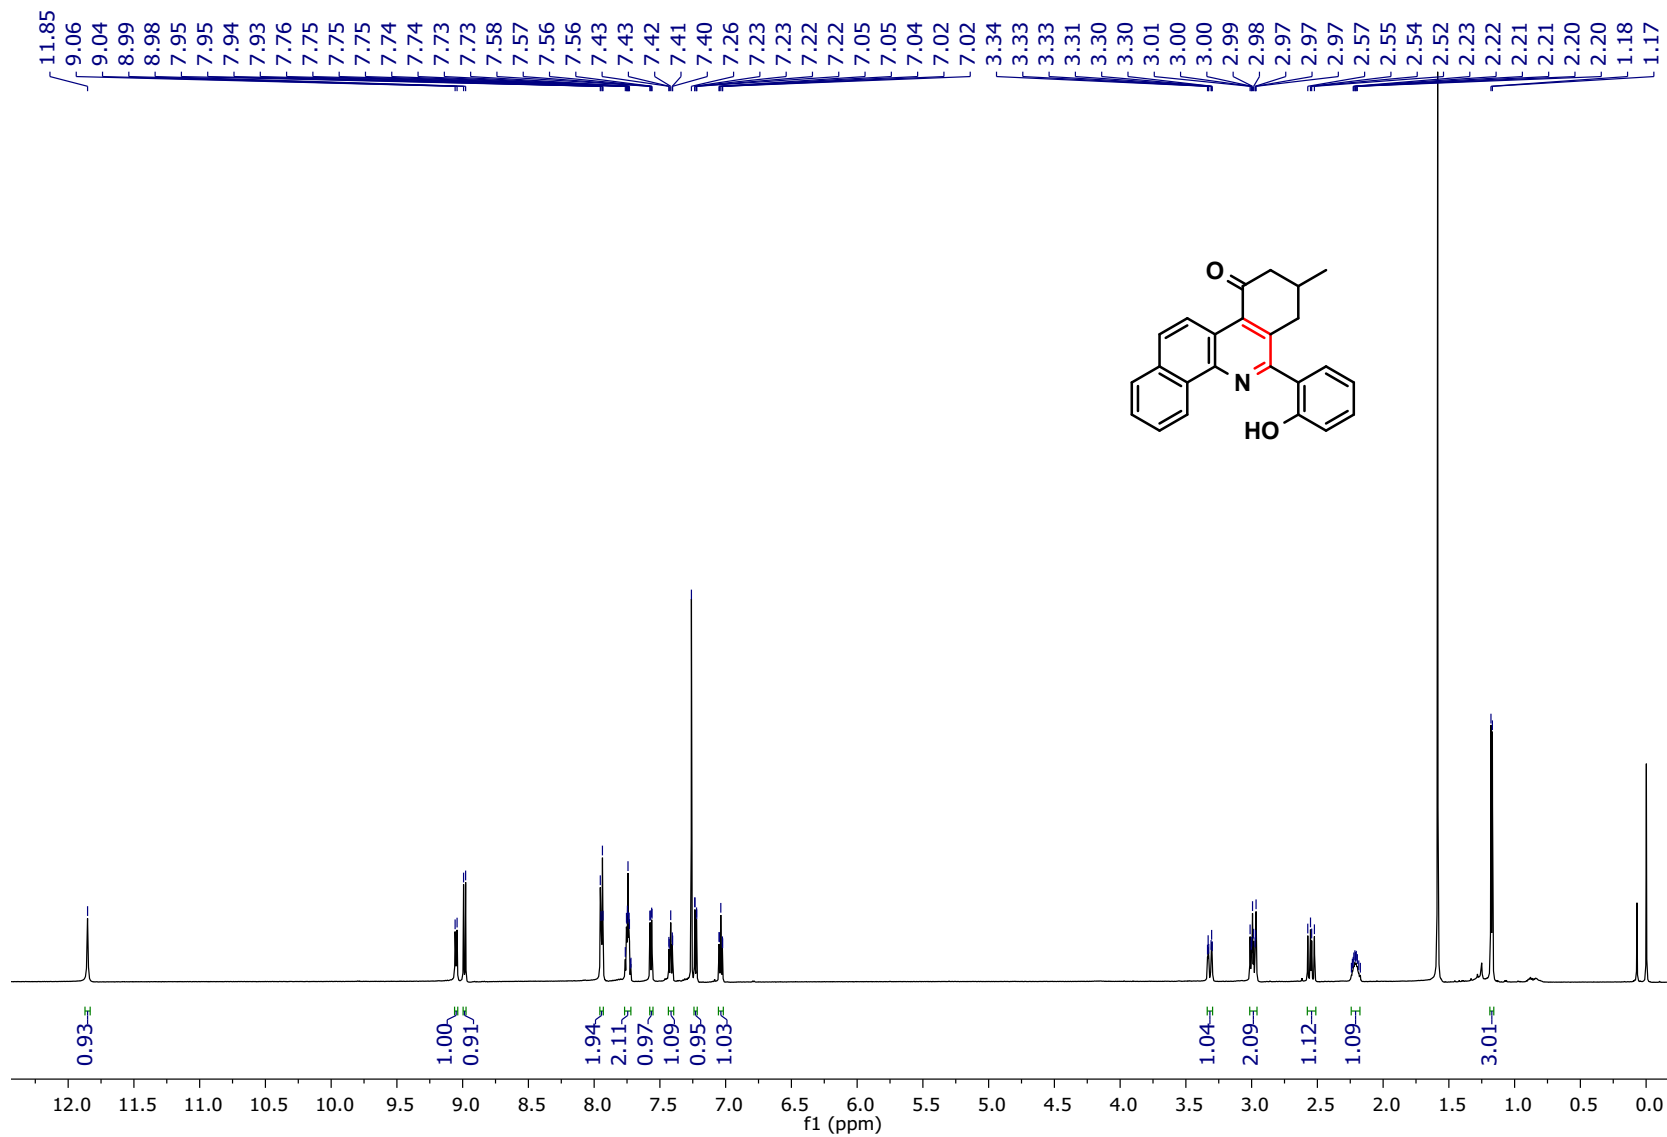

# <sup>13</sup>C NMR Spectrum of Compound 4r

ATK-SY-160320-13C — 13C —

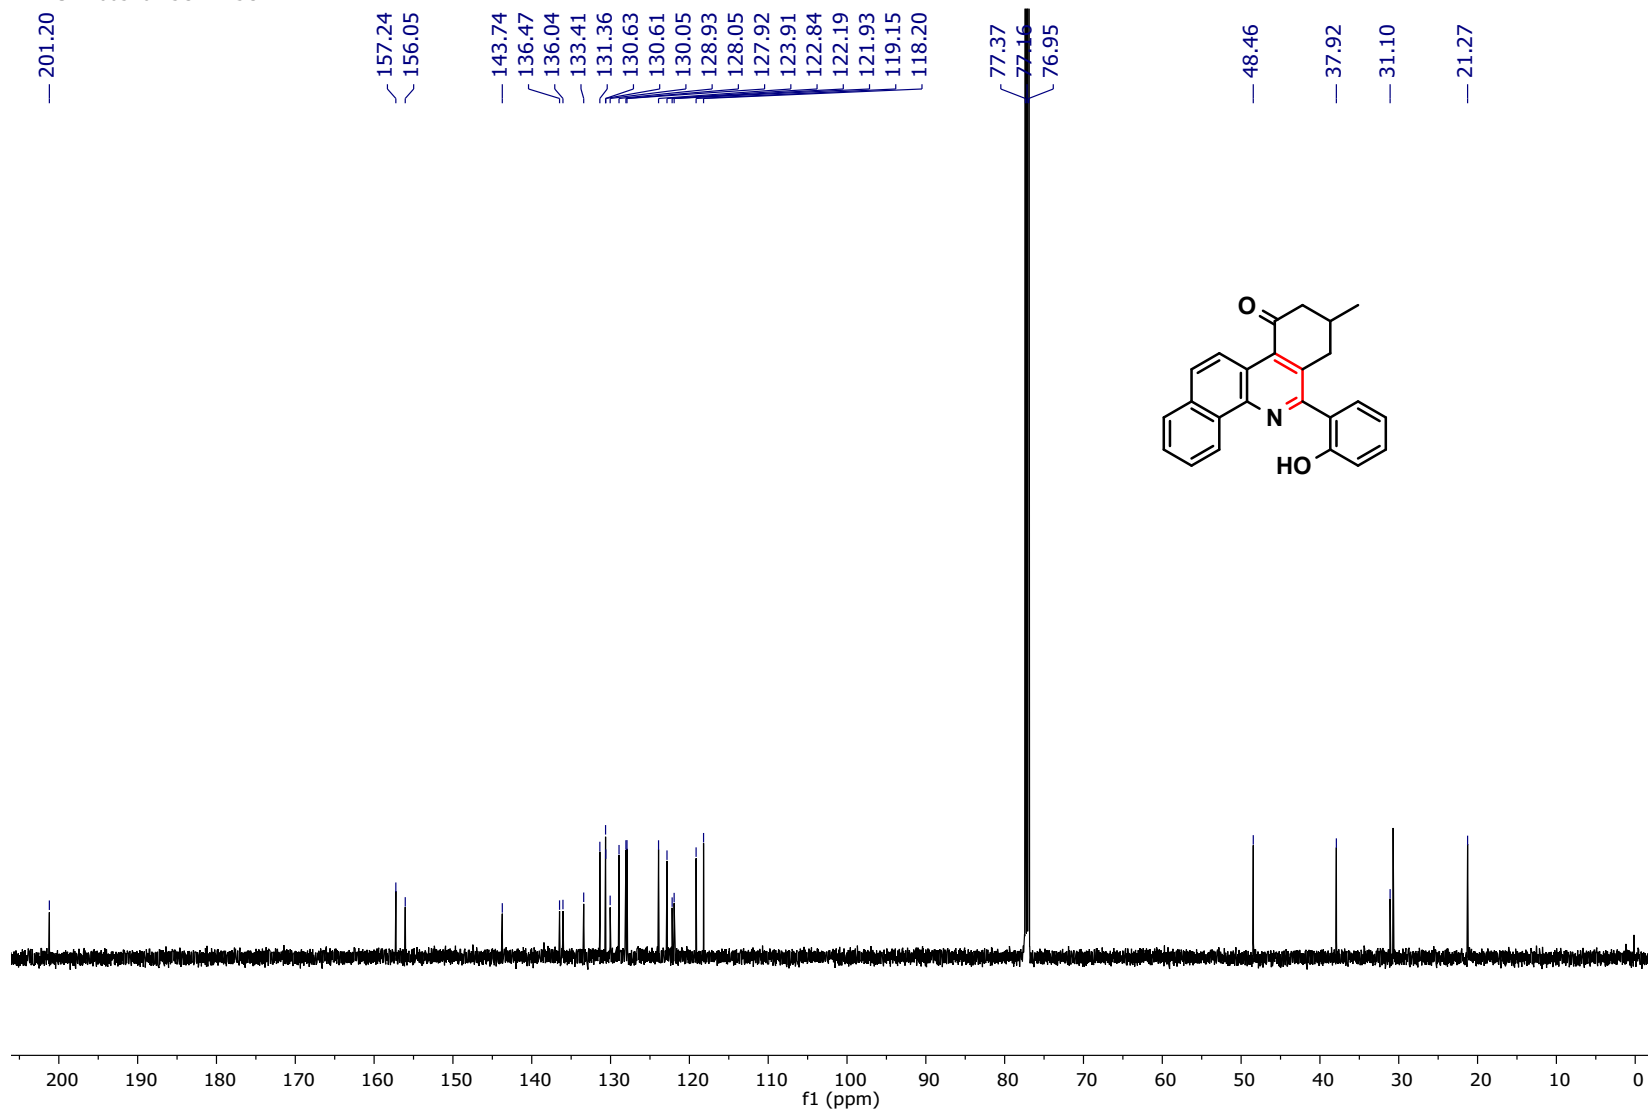

## HRMS Spectrum of Compound 4r

|             |                   |                        |         |                 |                                 |
|-------------|-------------------|------------------------|---------|-----------------|---------------------------------|
| Sample Name | 161120            | Position               | P1-C3   | Instrument Name | Instrument 1                    |
| User Name   |                   | Inj Vol                | 20      | InjPosition     |                                 |
| Sample Type | Sample            | IRM Calibration Status | Success | Data Filename   | ATK-SY-161120.d                 |
| ACQ Method  | ESI ALS 100-600.m | Comment                |         | Acquired Time   | 03-12-2020 12:23:48 (UTC+05:30) |

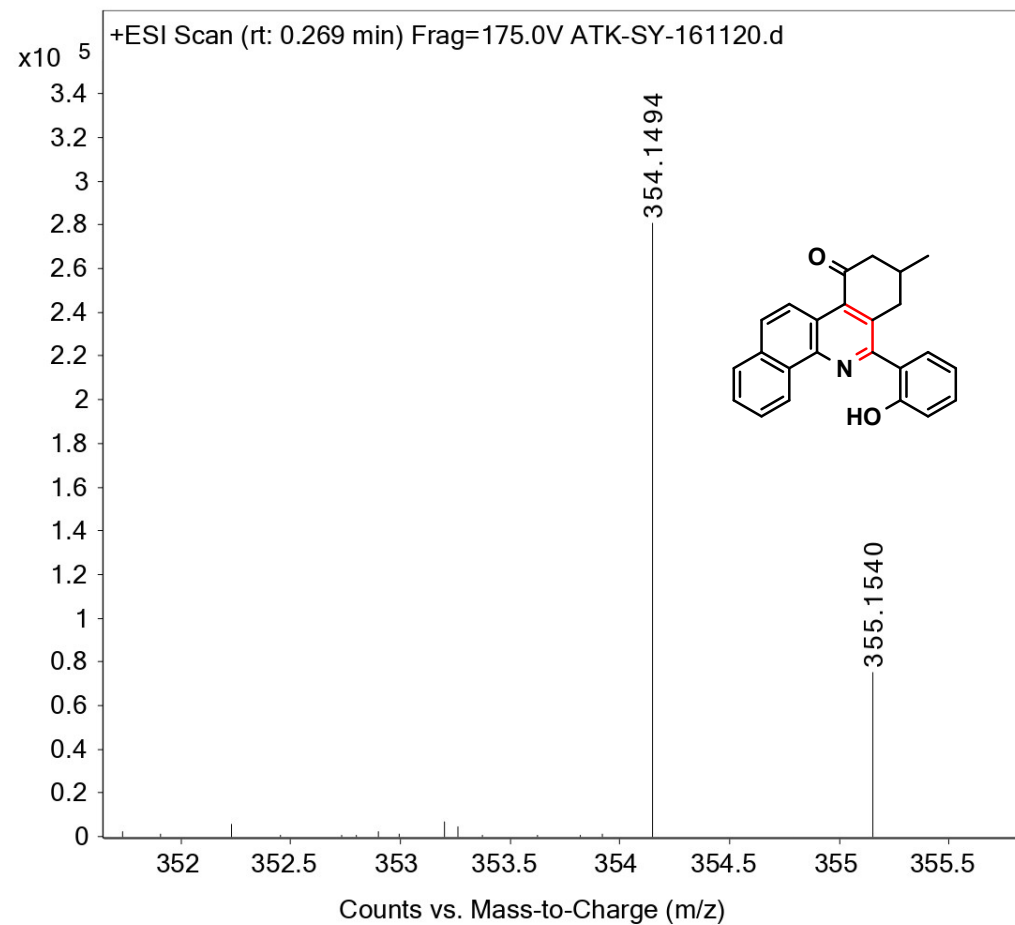

# <sup>1</sup>H NMR Spectrum of Compound 4s

ATK-SY-P27-1H.1.fid — ATK-SY-P27-1H

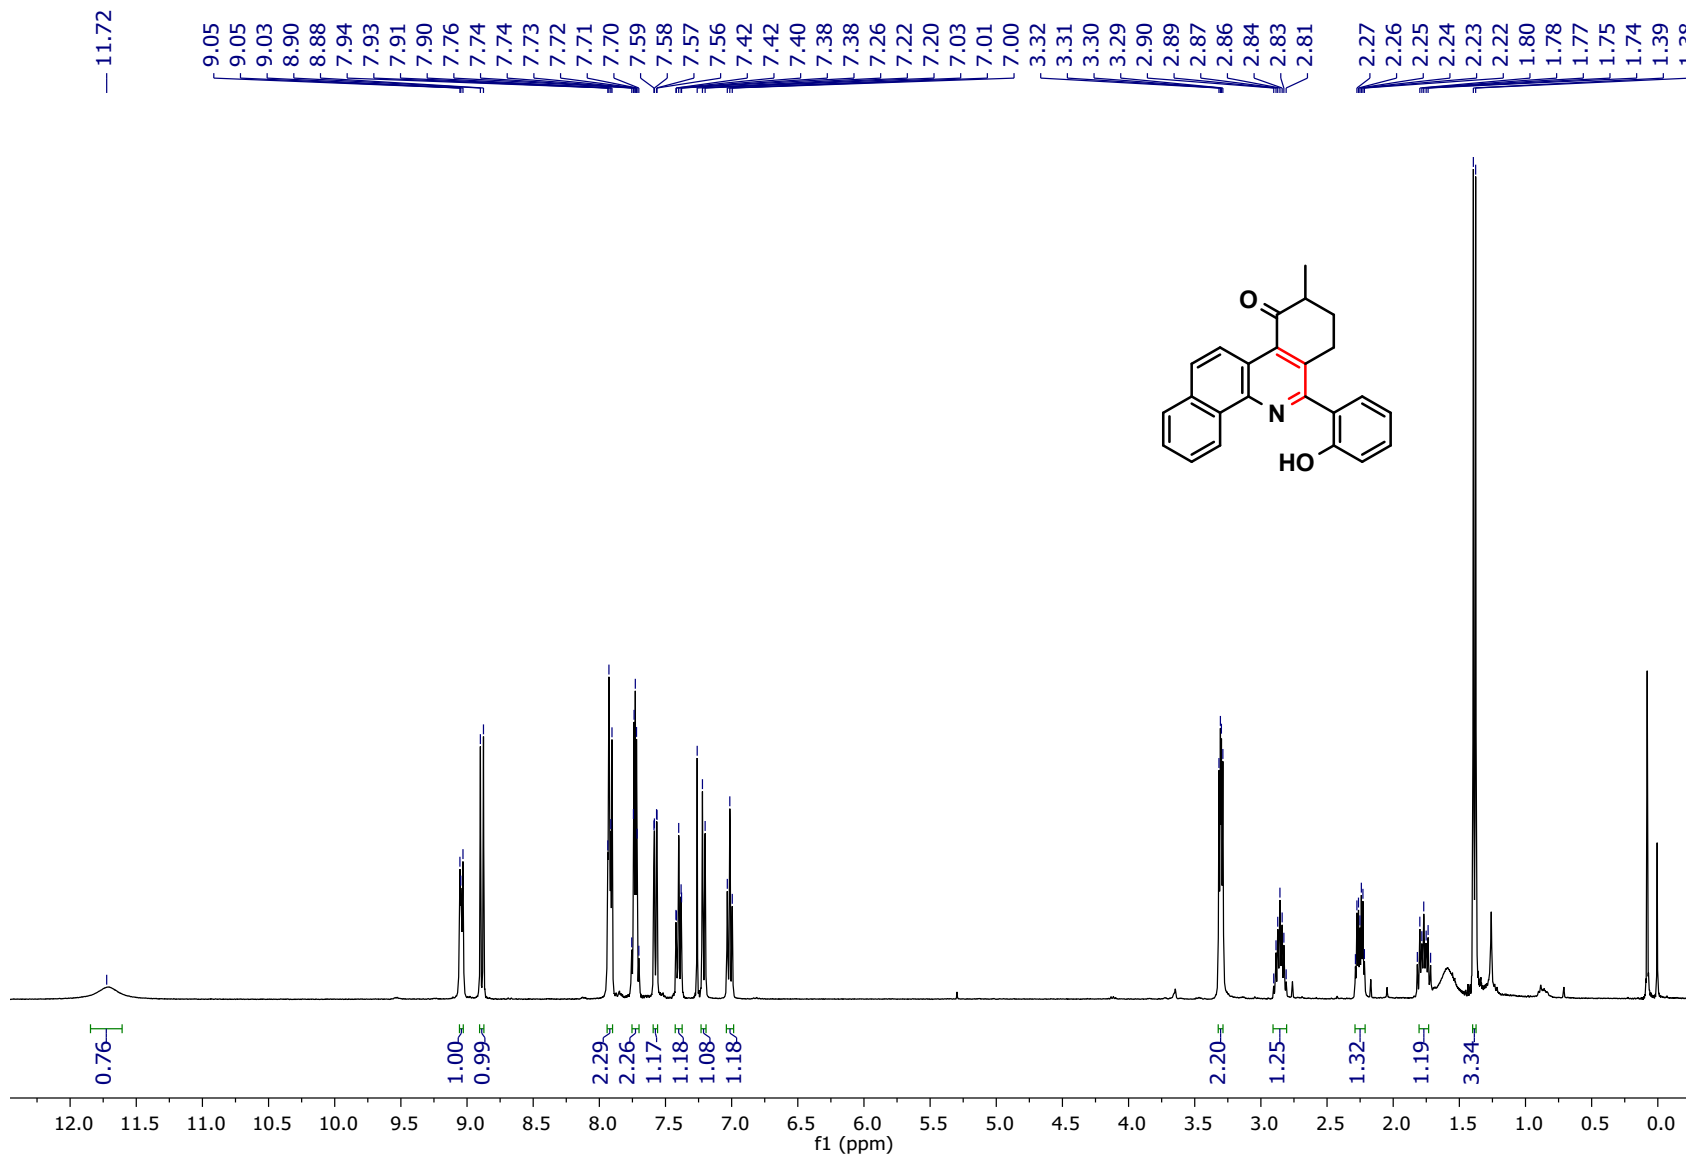

# <sup>13</sup>C NMR Spectrum of Compound 4s

ATK-SY-P27-13C.5.fid — ATK-SY-P27-13C

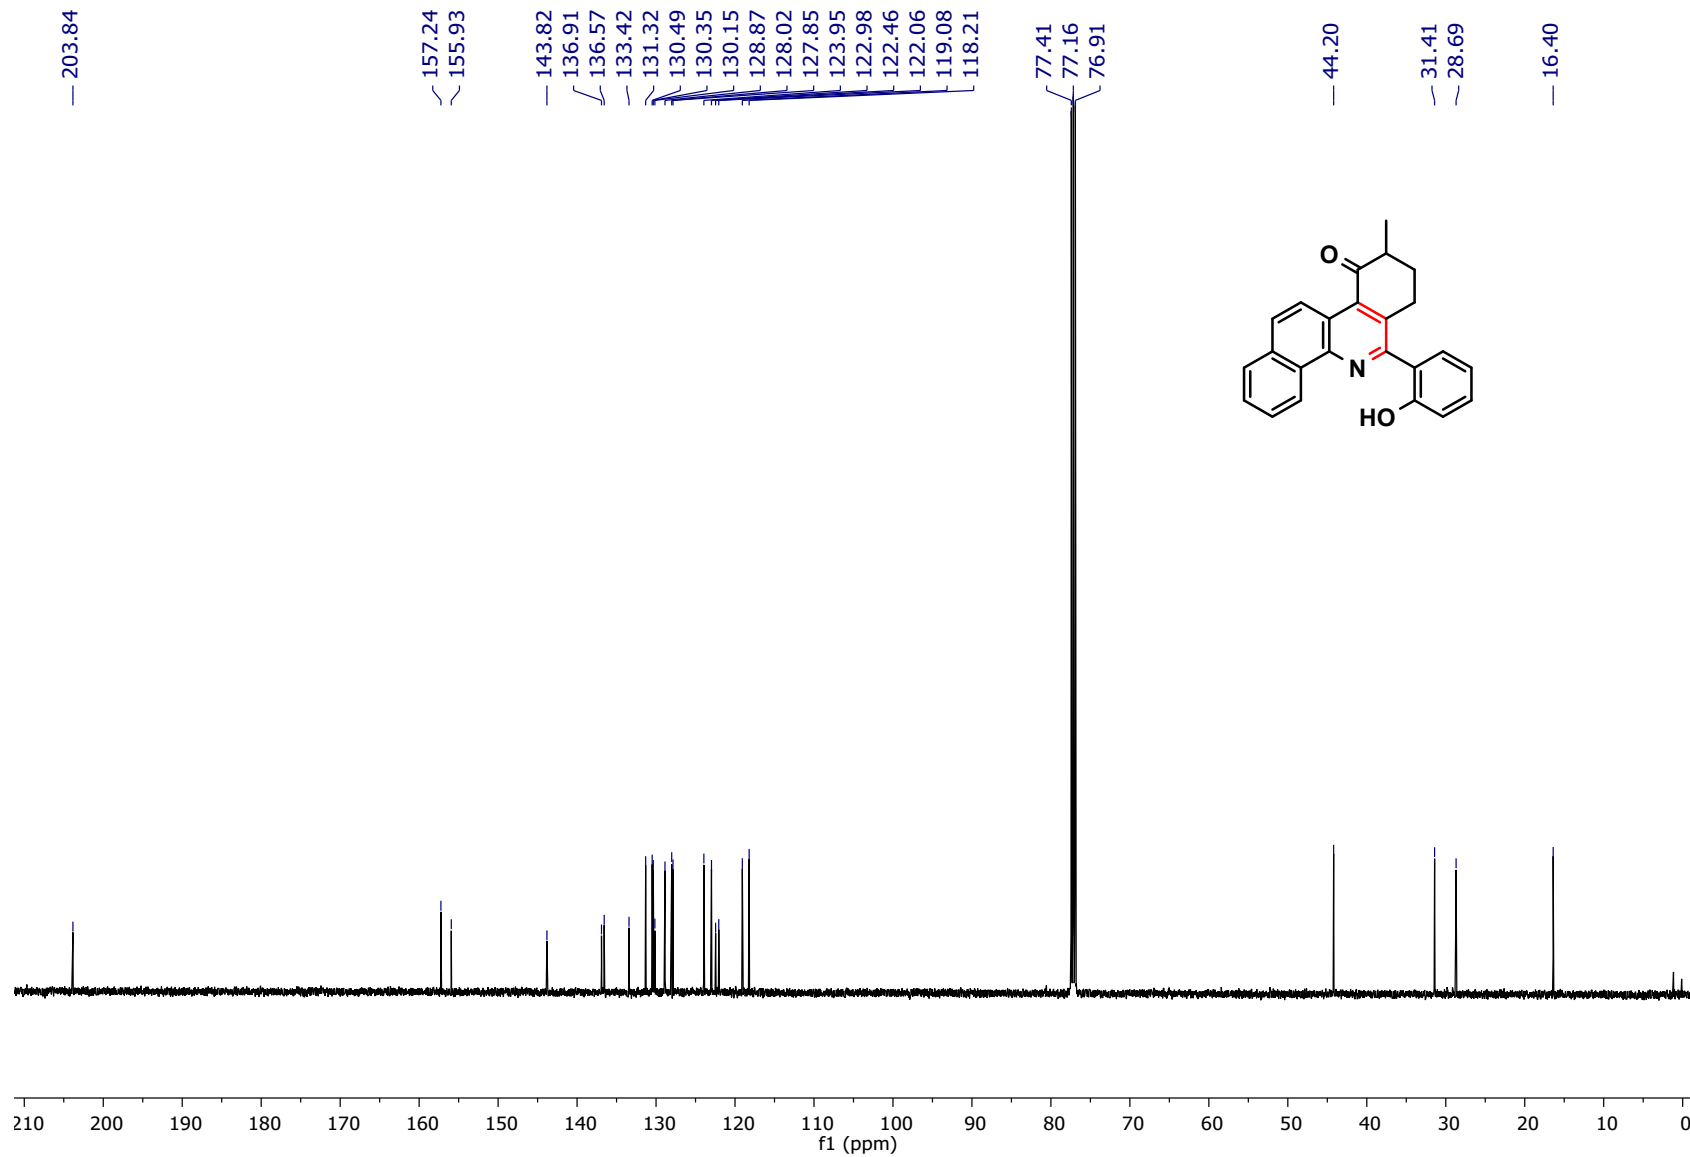

## HRMS Spectrum of Compound 4s

|                    |                    |                               |         |                        |                                   |
|--------------------|--------------------|-------------------------------|---------|------------------------|-----------------------------------|
| <b>Sample Name</b> | WASH               | <b>Position</b>               | P2-A4   | <b>Instrument Name</b> | Instrument 1                      |
| <b>User Name</b>   |                    | <b>Inj Vol</b>                | 20      | <b>InjPosition</b>     |                                   |
| <b>Sample Type</b> | Sample             | <b>IRM Calibration Status</b> | Success | <b>Data Filename</b>   | SY-PG9-A.d                        |
| <b>ACQ Method</b>  | ESI ALS 100-1000.m | <b>Comment</b>                |         | <b>Acquired Time</b>   | 31-Aug-21 05:53:06 PM (UTC+05:30) |

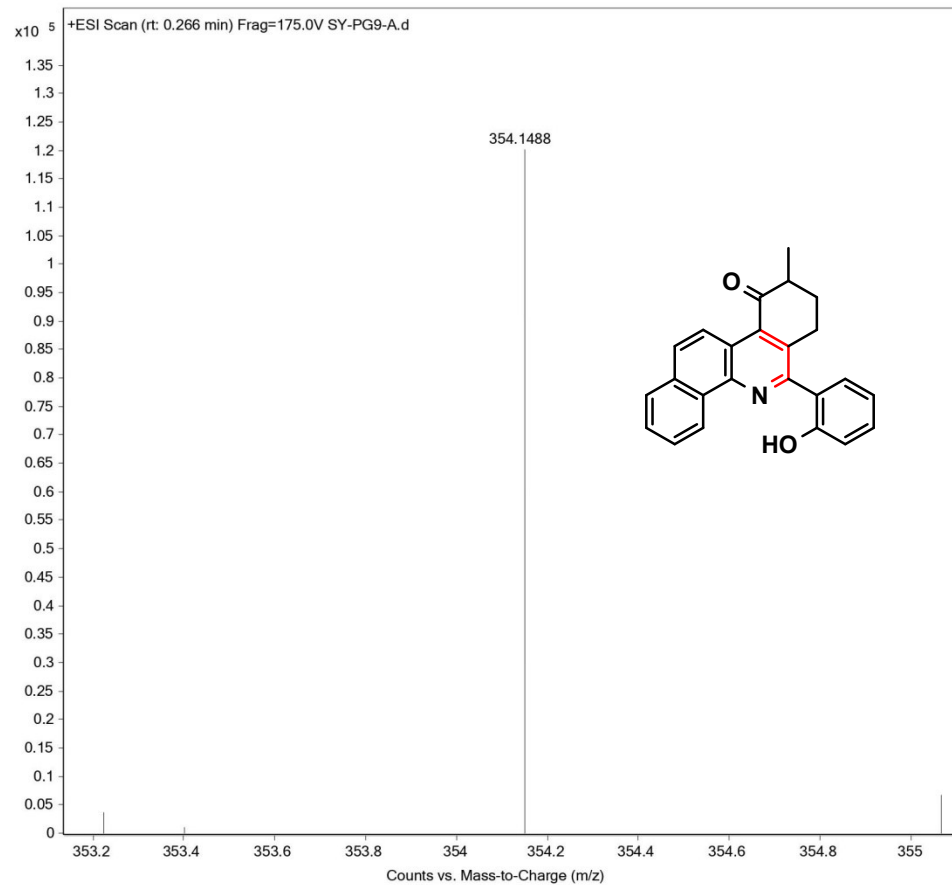

# <sup>1</sup>H NMR Spectrum of Compound 4t

ATK-SY-241120-1H.1.fid — ATK-SY-241120-1H

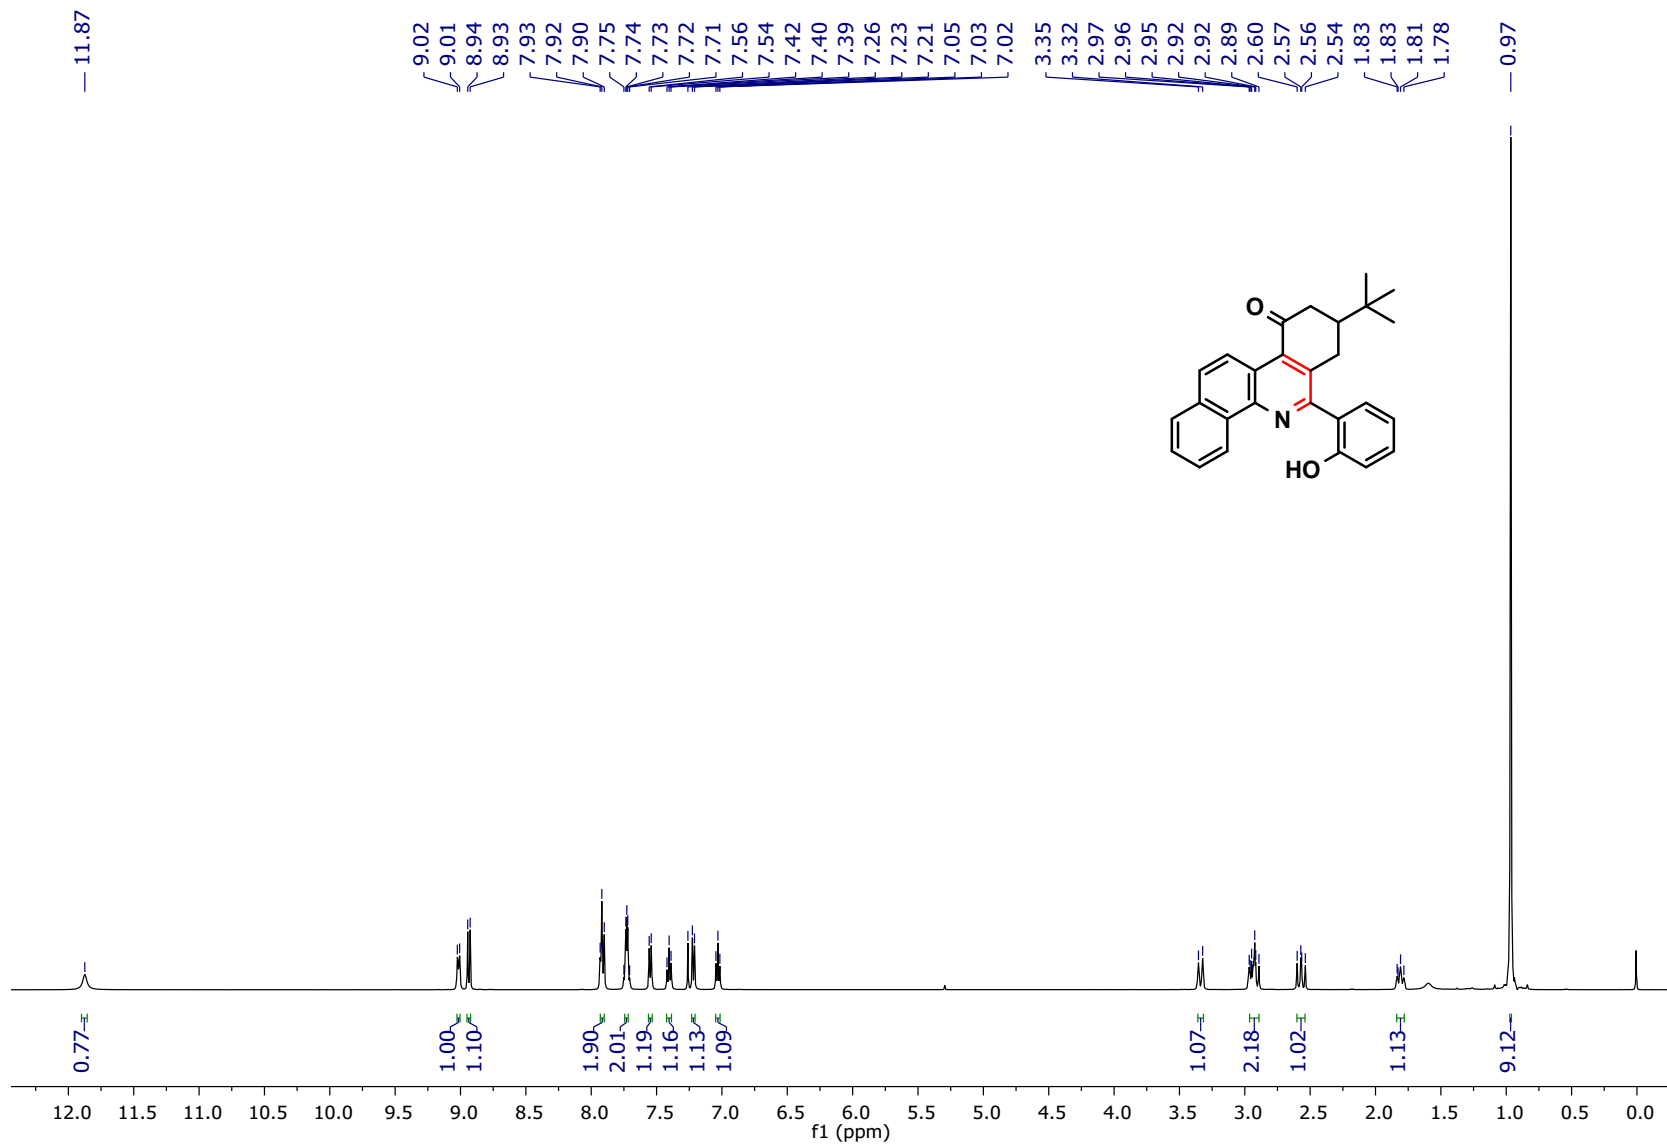

# <sup>13</sup>C NMR Spectrum of Compound 4t

ATK-SY-241120-13C — 13C —

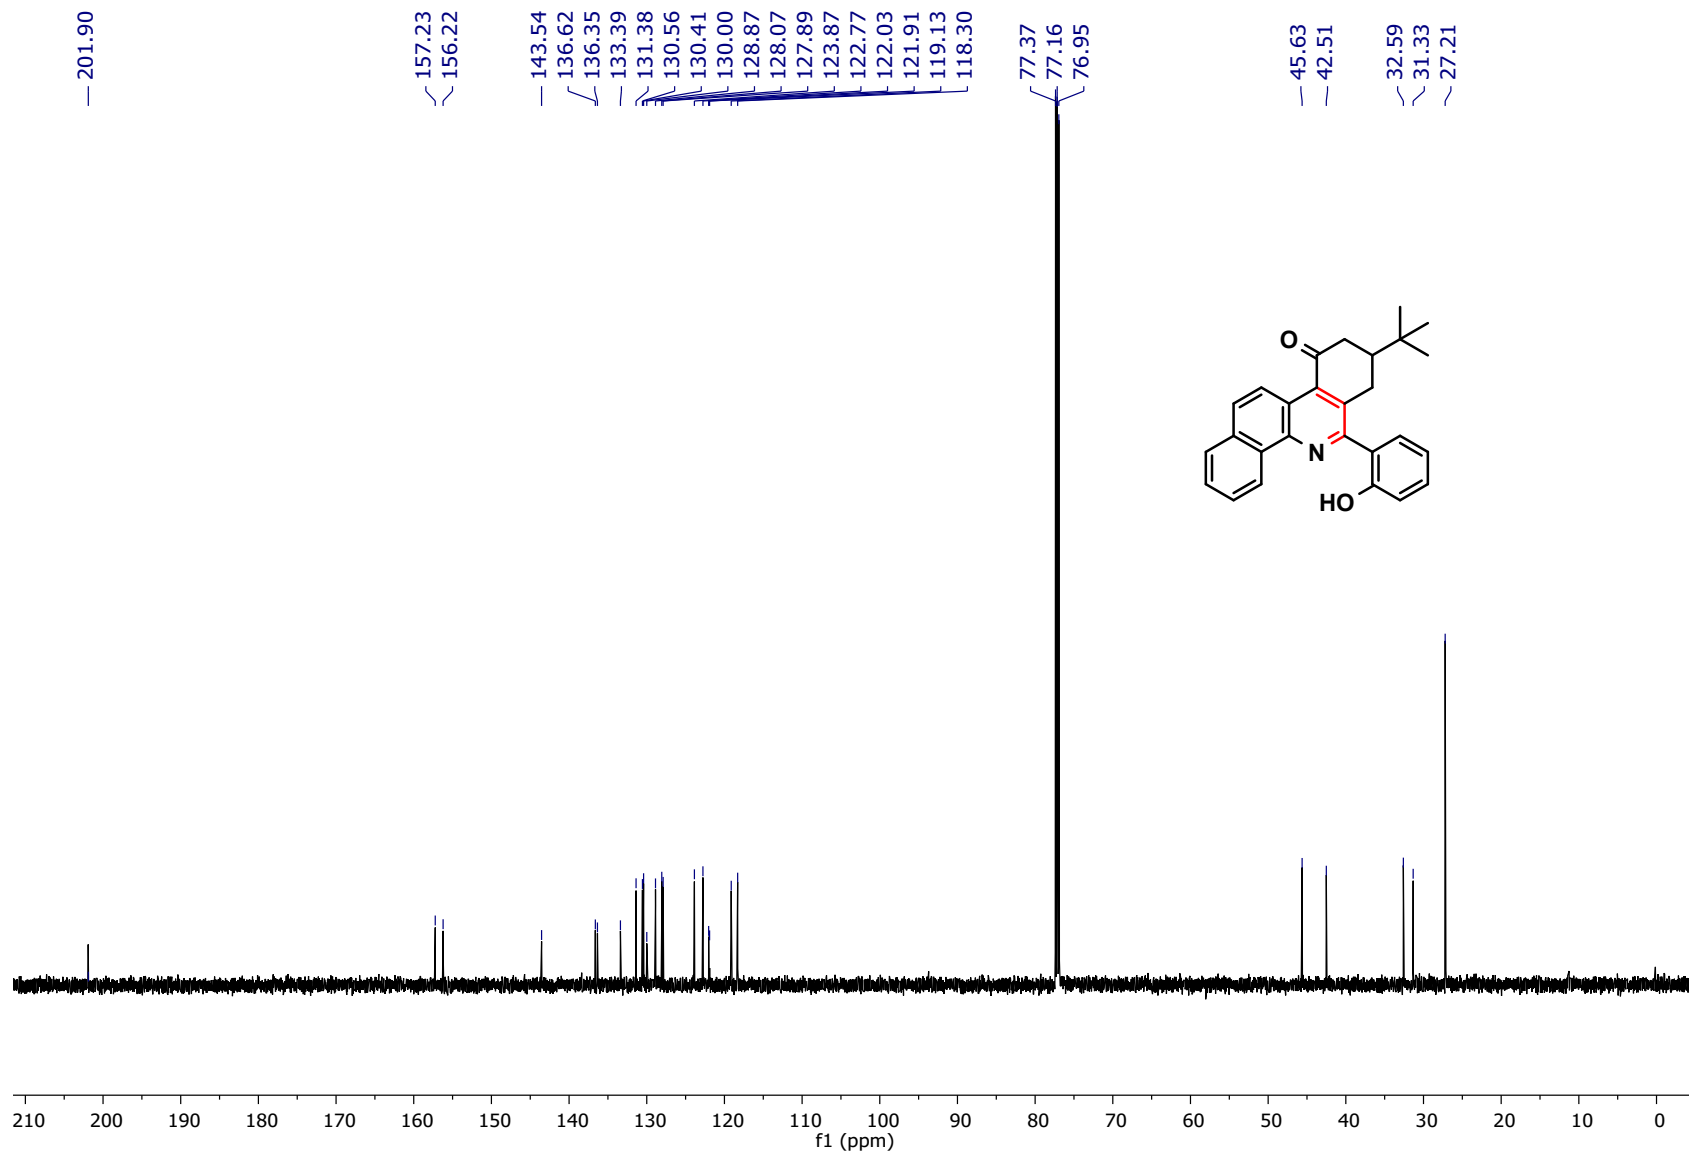



## HRMS Spectrum of Compound 4t

|             |                   |                        |         |                 |                                 |
|-------------|-------------------|------------------------|---------|-----------------|---------------------------------|
| Sample Name | ATK-SY-261120     | Position               | P1-C2   | Instrument Name | Instrument 1                    |
| User Name   |                   | Inj Vol                | 20      | InjPosition     |                                 |
| Sample Type | Sample            | IRM Calibration Status | Success | Data Filename   | ATK-SY-241120.d                 |
| ACQ Method  | ESI ALS 100-600.m | Comment                |         | Acquired Time   | 03-12-2020 12:19:52 (UTC+05:30) |

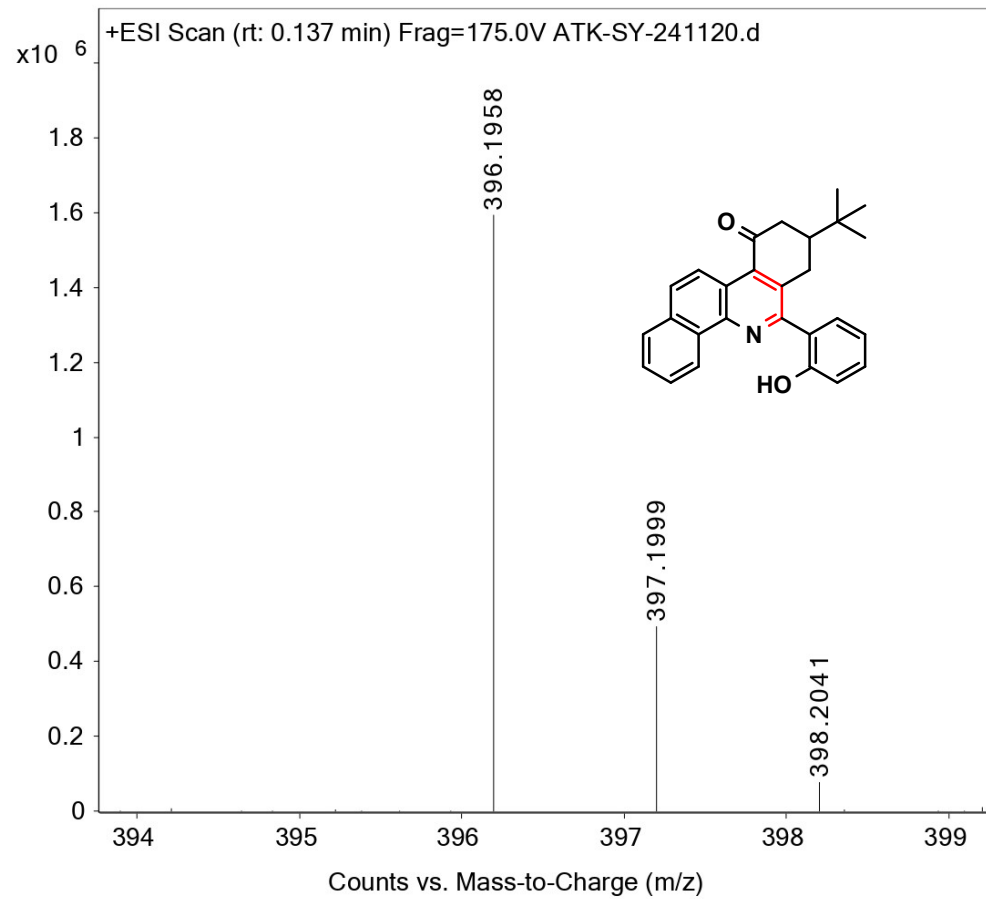

# <sup>1</sup>H NMR Spectrum of Compound 4u

ATK-SY-PG-15-1H.1.fid — ATK-SY-PG-15-1H

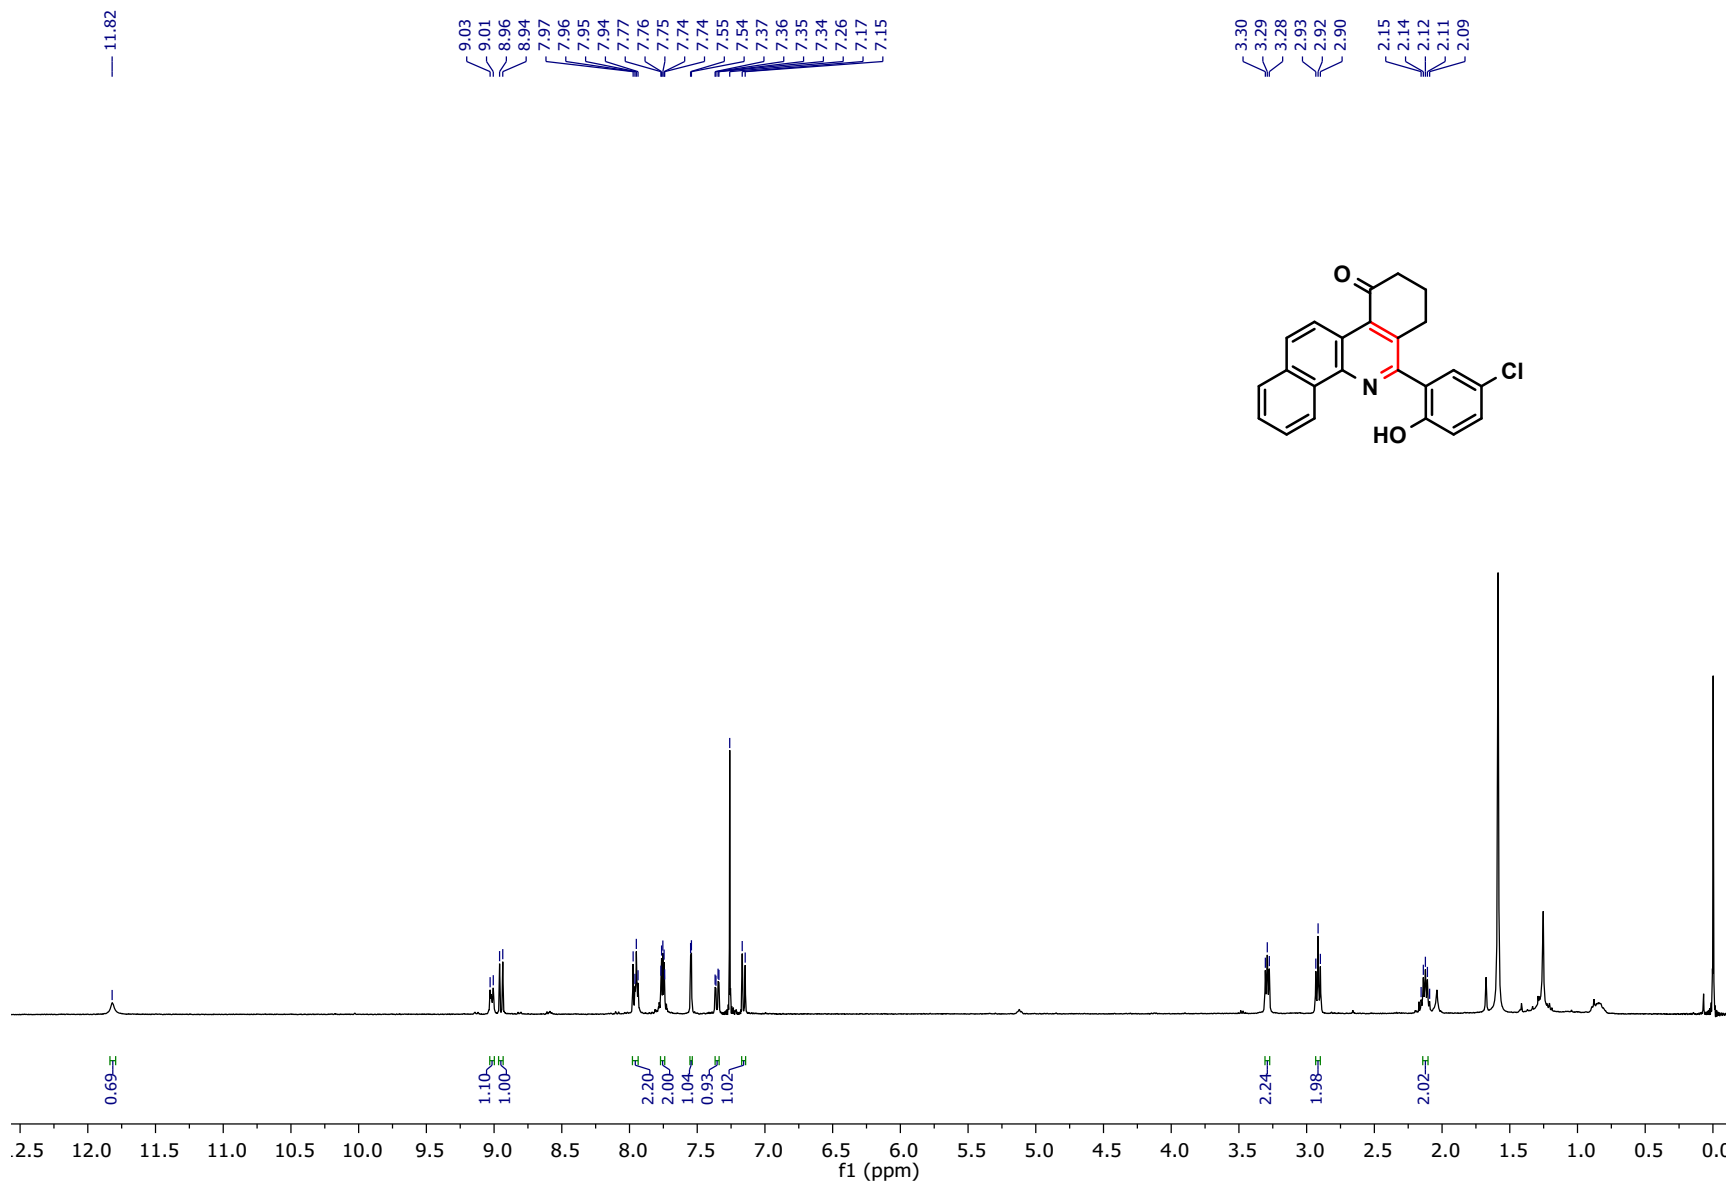

# <sup>13</sup>C NMR Spectrum of Compound 4u

ATK-SY-PG15-13C.3.fid — ATK-SY-PG15-13C

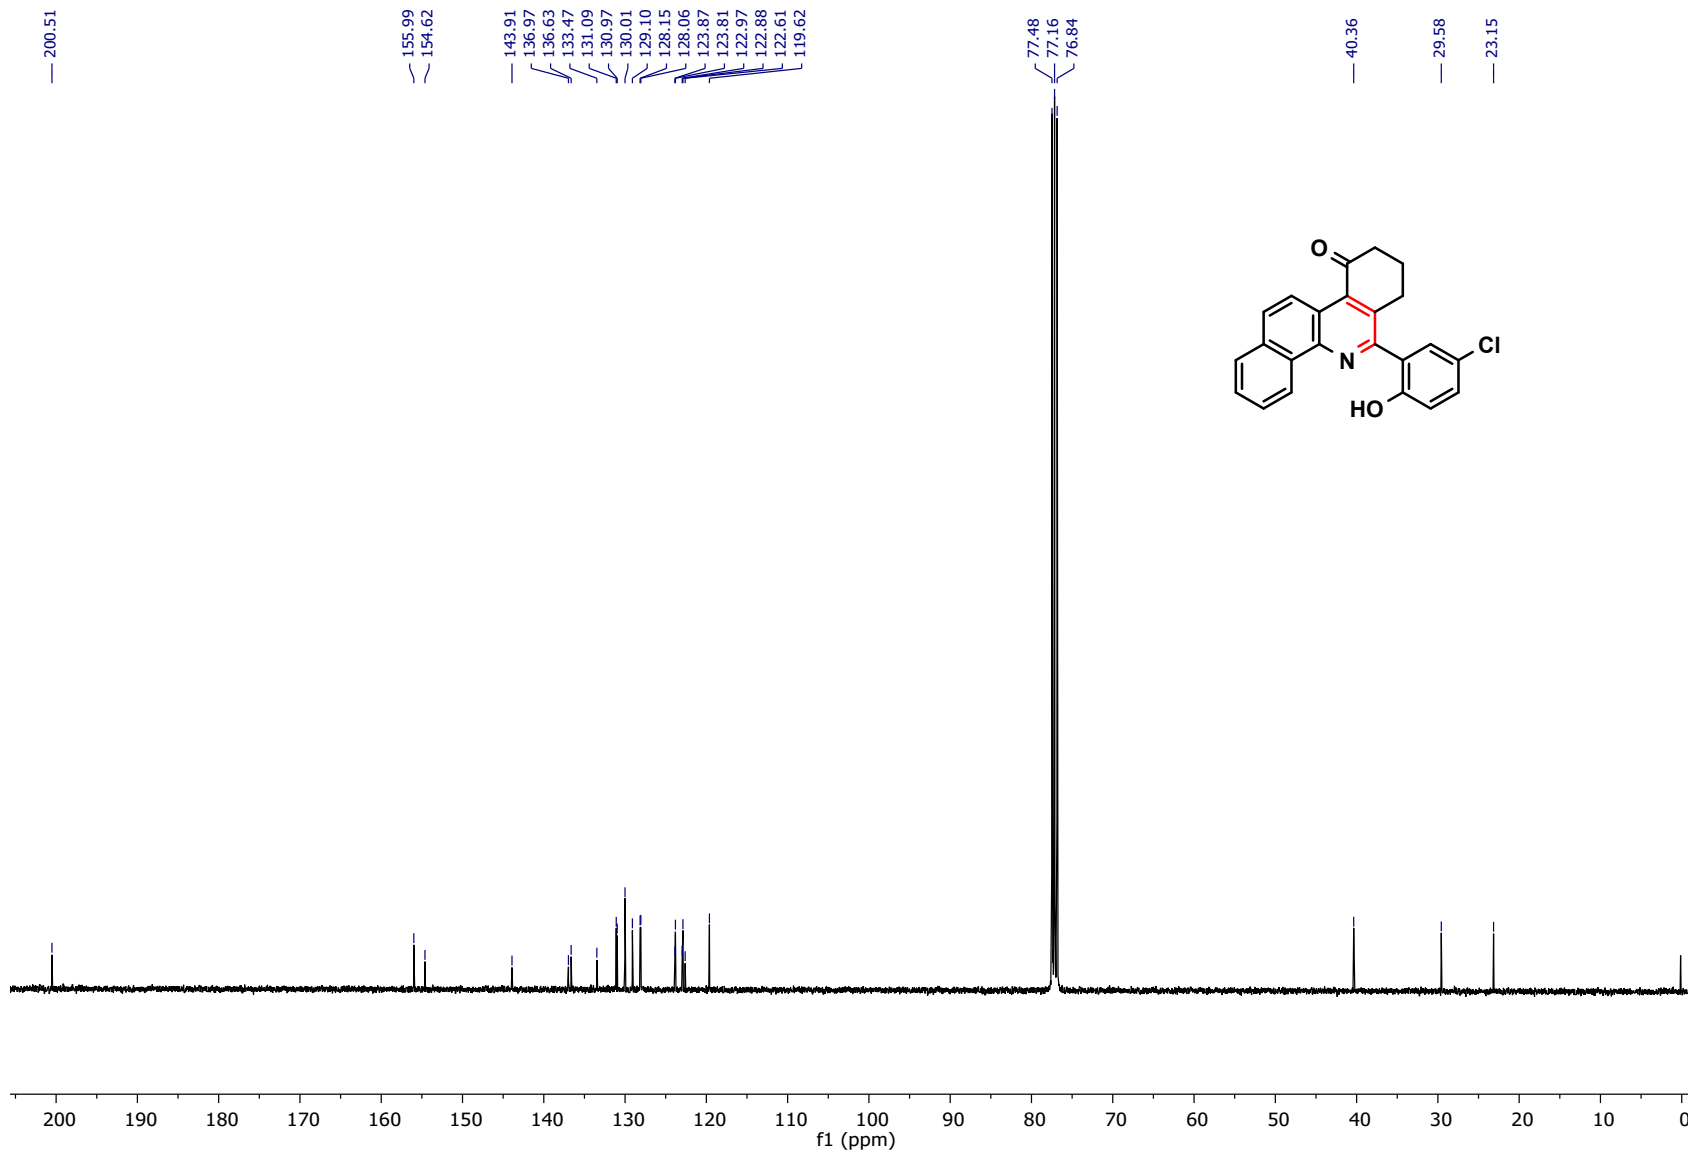

# <sup>1</sup>H NMR Spectrum of Compound 4u

|             |                      |                        |         |                 |                                   |
|-------------|----------------------|------------------------|---------|-----------------|-----------------------------------|
| Sample Name | PG15                 | Position               | P1-A3   | Instrument Name | Instrument 1                      |
| User Name   |                      | Inj Vol                | 10      | InjPosition     |                                   |
| Sample Type | Sample               | IRM Calibration Status | Success | Data Filename   | PG15_003.d                        |
| ACQ Method  | FULL SCAN-POSITIVE.m | Comment                |         | Acquired Time   | 18-Aug-22 12:14:03 PM (UTC+05:30) |

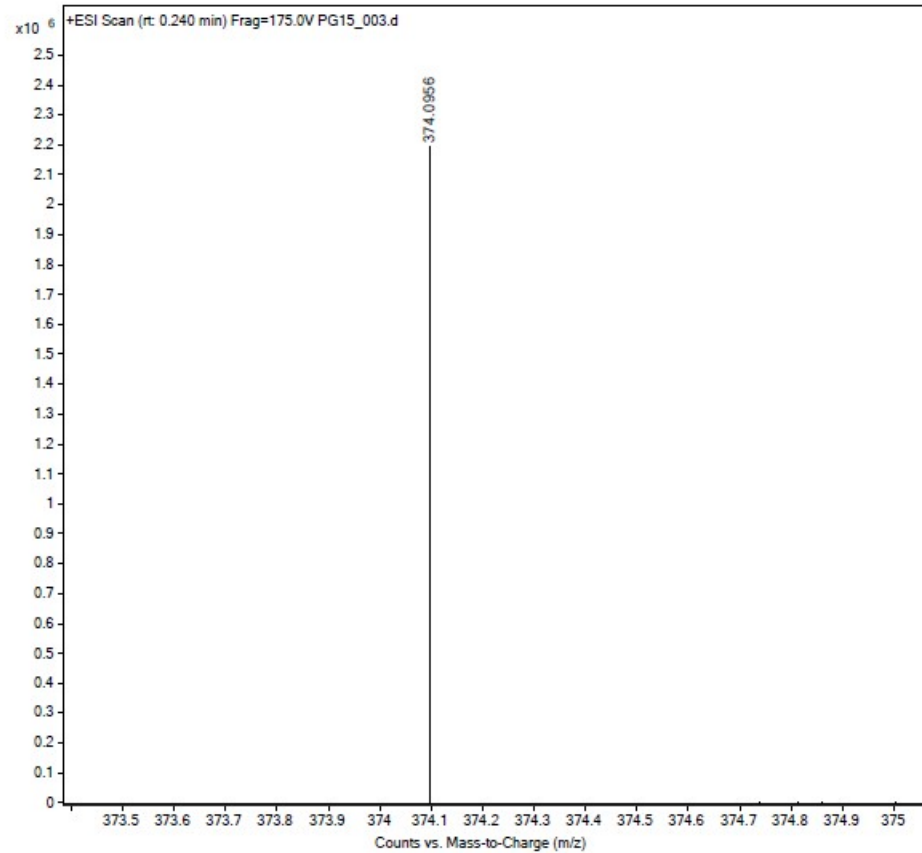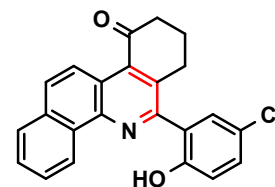

# <sup>1</sup>H NMR Spectrum of Compound 4v

ATK-SY-P35-1H.1.fid — ATK-SY-P35-1H

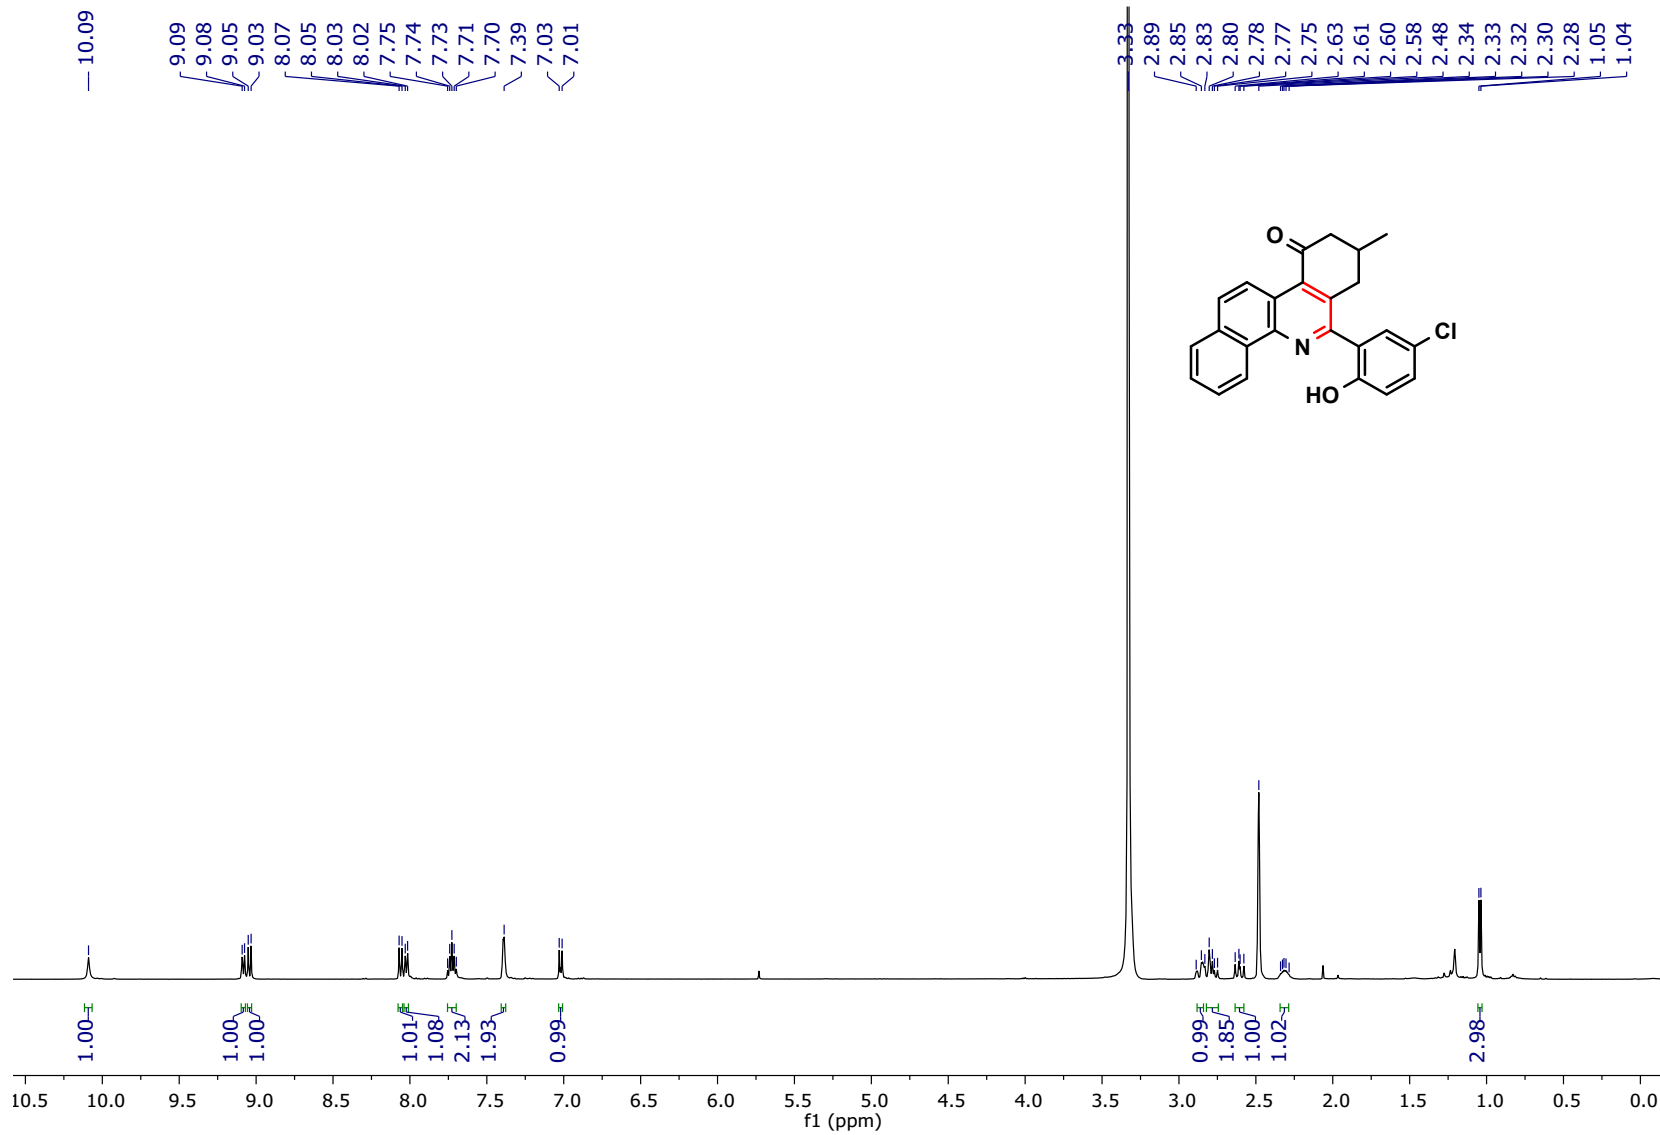

# <sup>13</sup>C NMR Spectrum of Compound 4v

ATK-SY-P35-13C.1.fid — ATK-SY-P35-13C

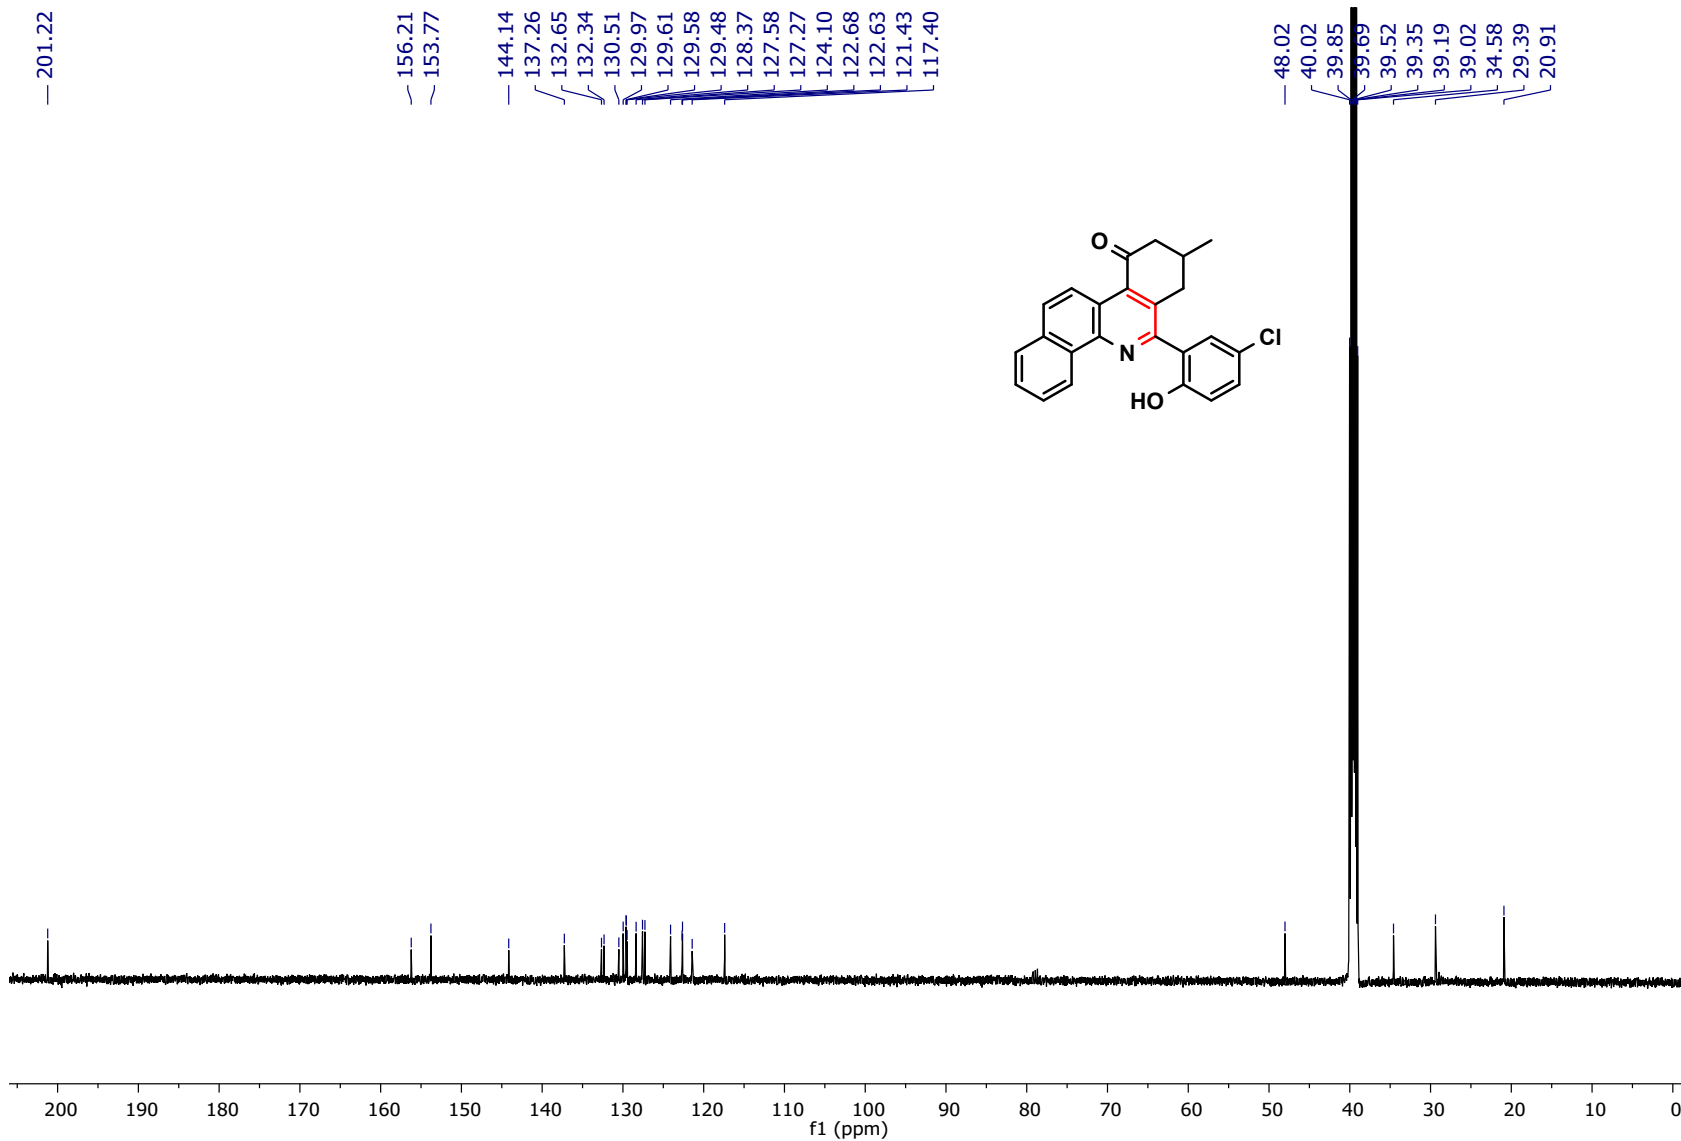

## HRMS Spectrum of Compound 4v

|                    |                   |                               |         |                        |                                 |
|--------------------|-------------------|-------------------------------|---------|------------------------|---------------------------------|
| <b>Sample Name</b> | SAMPLE            | <b>Position</b>               | P1-C7   | <b>Instrument Name</b> | Instrument 1                    |
| <b>User Name</b>   |                   | <b>Inj Vol</b>                | 20      | <b>InjPosition</b>     |                                 |
| <b>Sample Type</b> | Sample            | <b>IRM Calibration Status</b> | Success | <b>Data Filename</b>   | SY-P354.d                       |
| <b>ACQ Method</b>  | ESI ALS 100-600.m | <b>Comment</b>                |         | <b>Acquired Time</b>   | 11-02-2021 12:52:03 (UTC+05:30) |

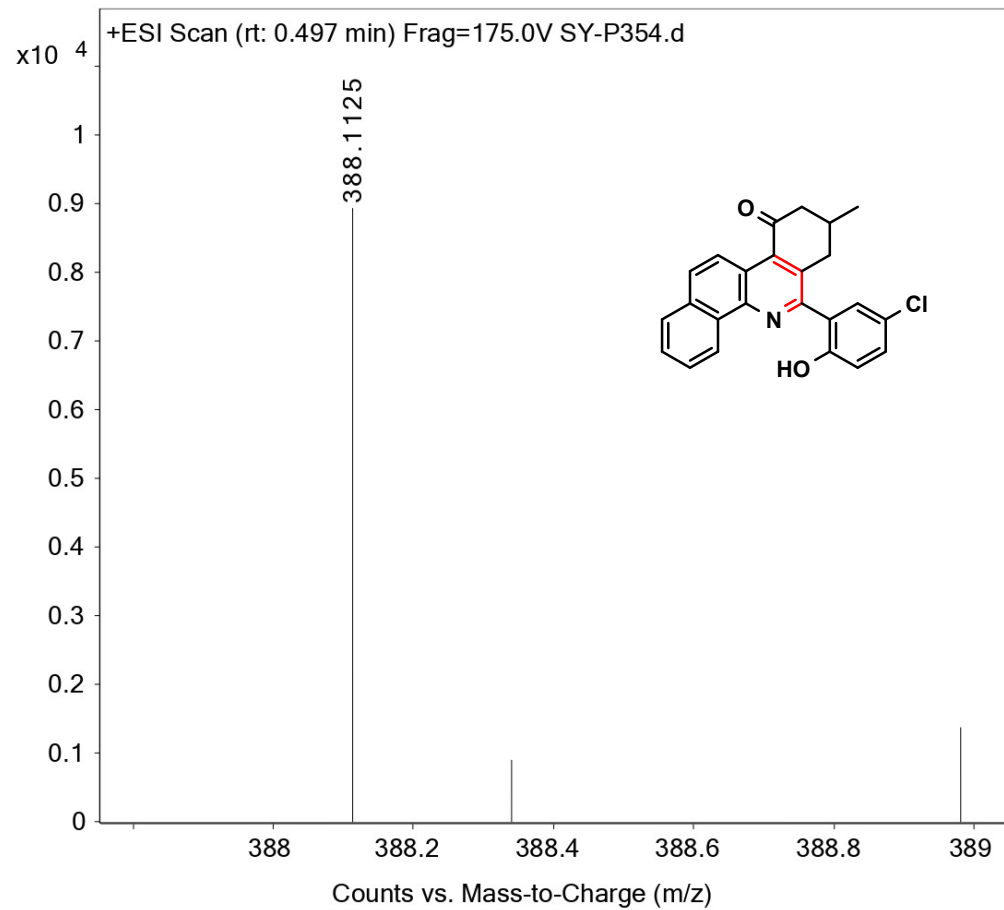





# <sup>13</sup>C NMR Spectrum of Compound 4w

ATK-SY-PG5-13C.1.fid — ATK-SY-PG5-13C

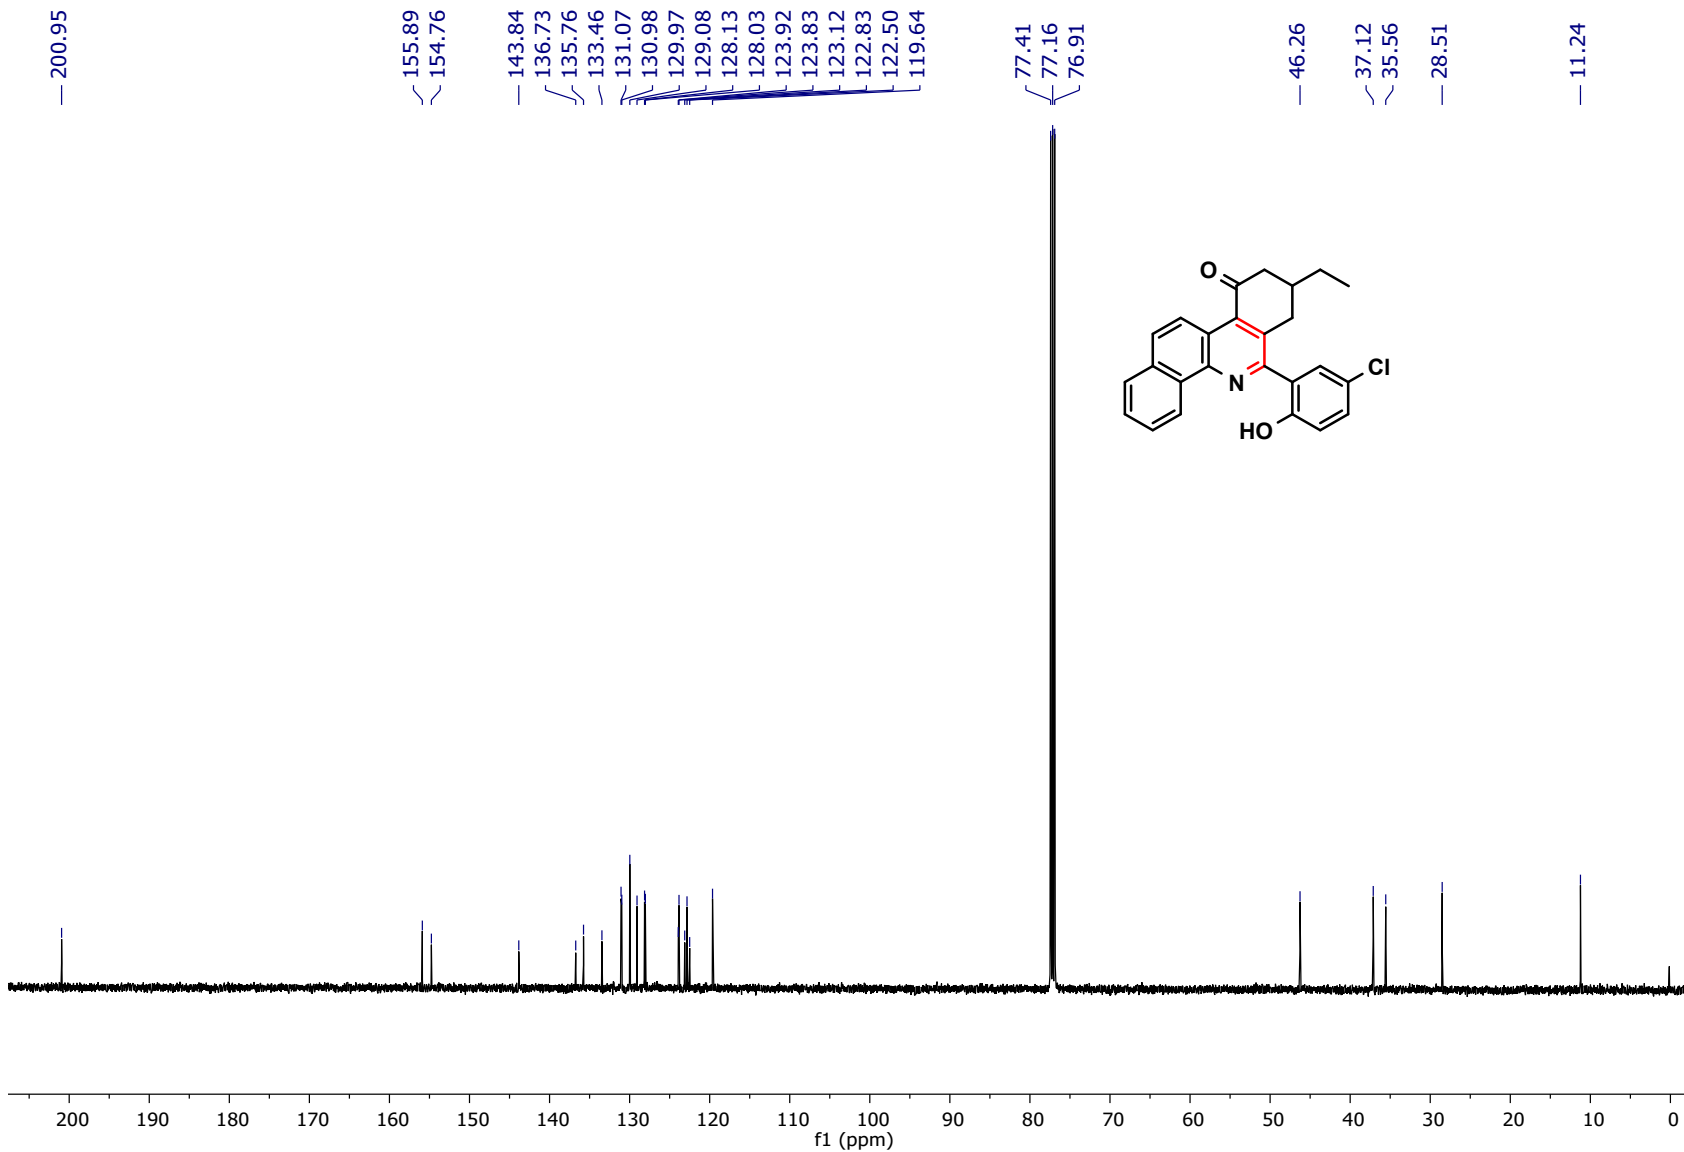

## HRMS Spectrum of Compound 4w

### Analysis Info

Analysis Name D:\Data\user data\HPLC\DR LOKMAN\30.10.2021\ATK-SY-PG-5\_RA3\_01\_1138.d  
Method low mass bruker.m  
Sample Name ATK-SY-PG-5  
Comment

Acquisition Date 11/2/2021 7:46:59 AM

Operator vidhi  
Instrument impact HD 1819696.00197

### Acquisition Parameter

|             |          |                      |          |                  |           |
|-------------|----------|----------------------|----------|------------------|-----------|
| Source Type | ESI      | Ion Polarity         | Positive | Set Nebulizer    | 1.8 Bar   |
| Focus       | Active   | Set Capillary        | 4500 V   | Set Dry Heater   | 200 °C    |
| Scan Begin  | 50 m/z   | Set End Plate Offset | -500 V   | Set Dry Gas      | 6.0 l/min |
| Scan End    | 1500 m/z | Set Charging Voltage | 2000 V   | Set Divert Valve | Waste     |
|             |          | Set Corona           | 0 nA     | Set APCI Heater  | 0 °C      |

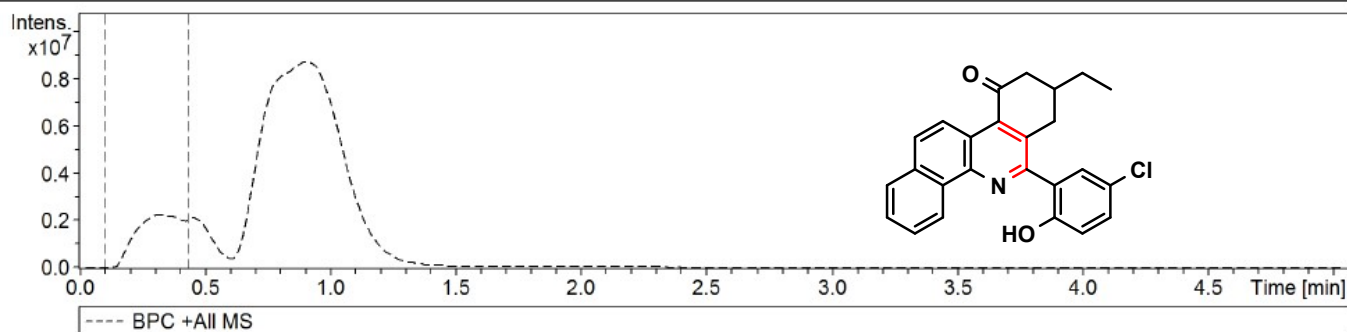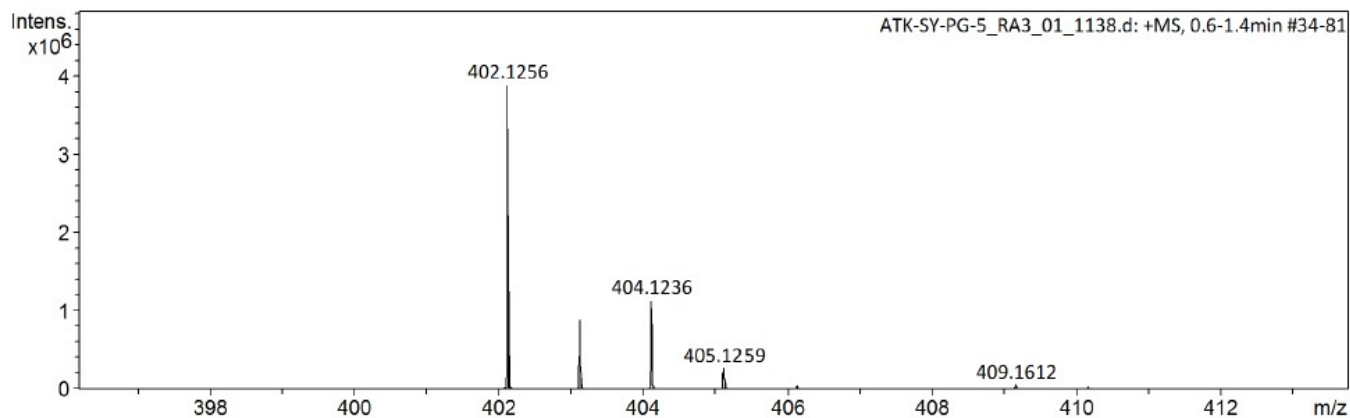

# <sup>1</sup>H NMR Spectrum of Compound 4x

ATK-SY-PG9-1H.1.fid — ATK-SY-PG9-1H

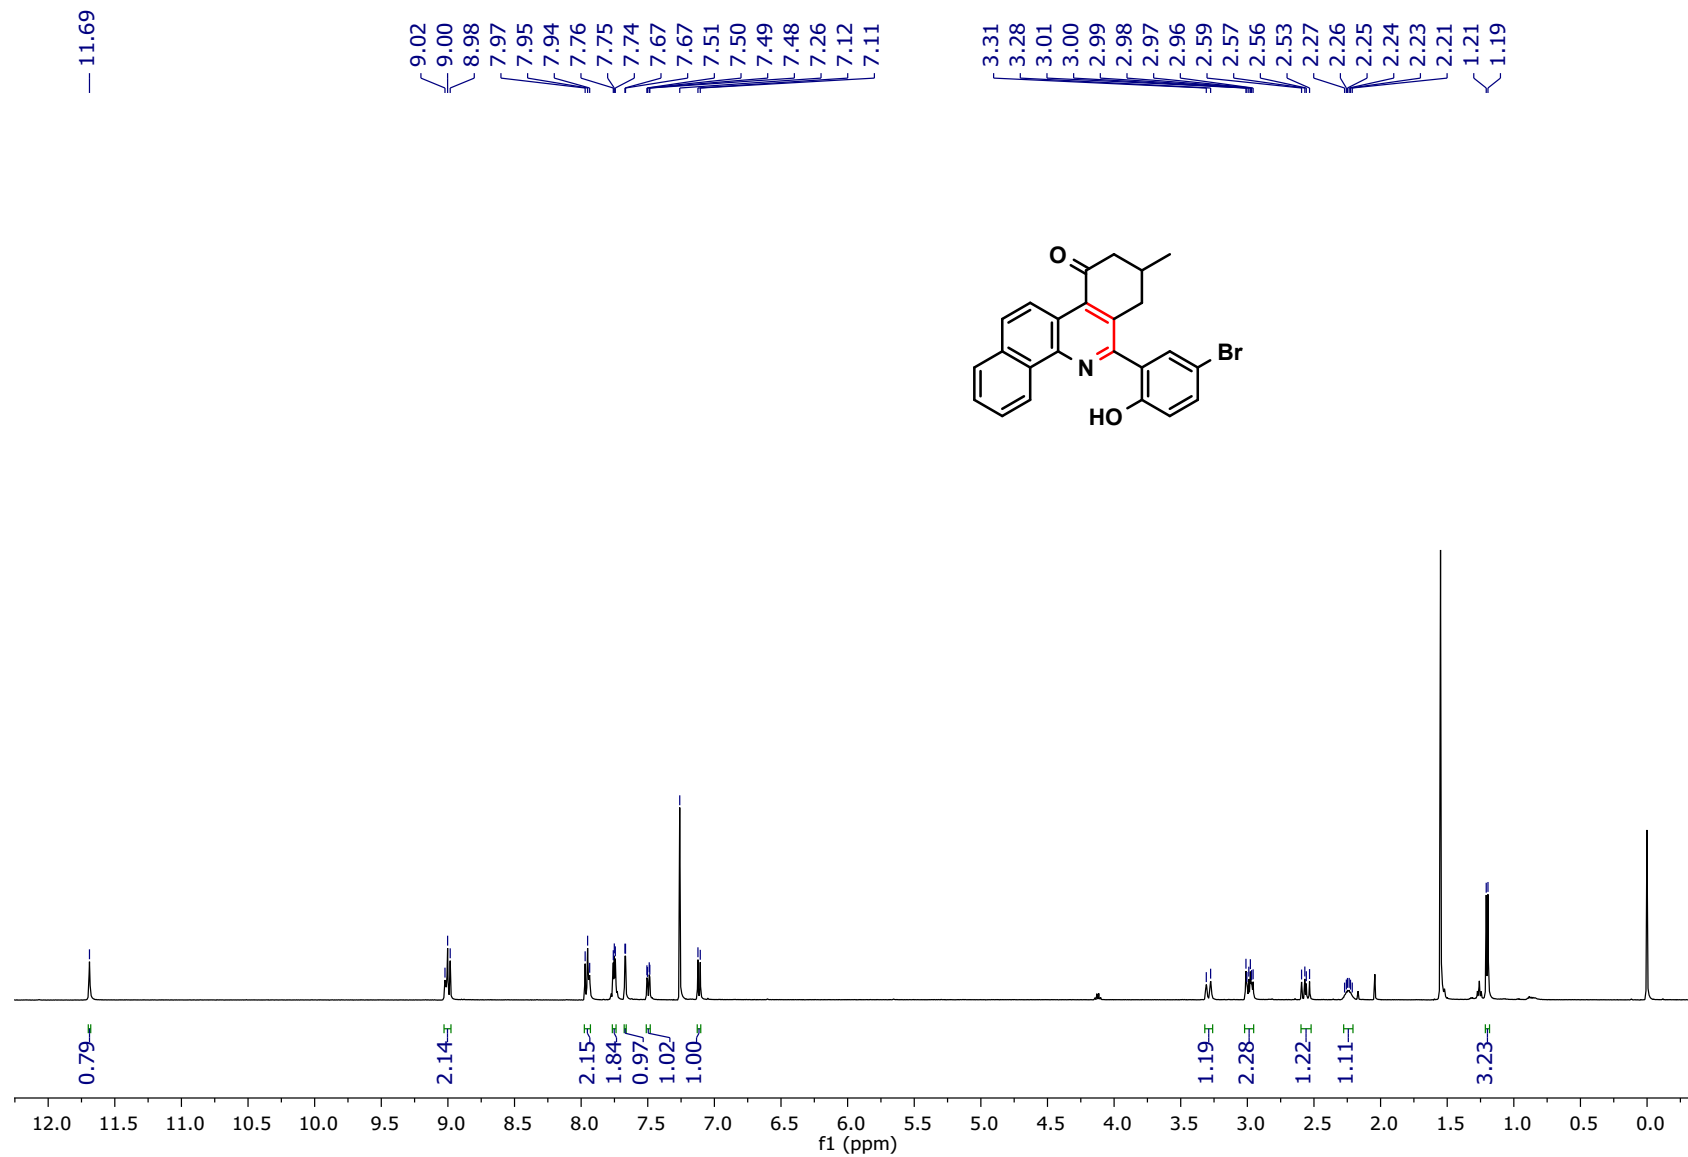

# <sup>13</sup>C NMR Spectrum of Compound 4x

ATK-SY-PG9-13C.3.fid — ATK-SY-PG9-13C

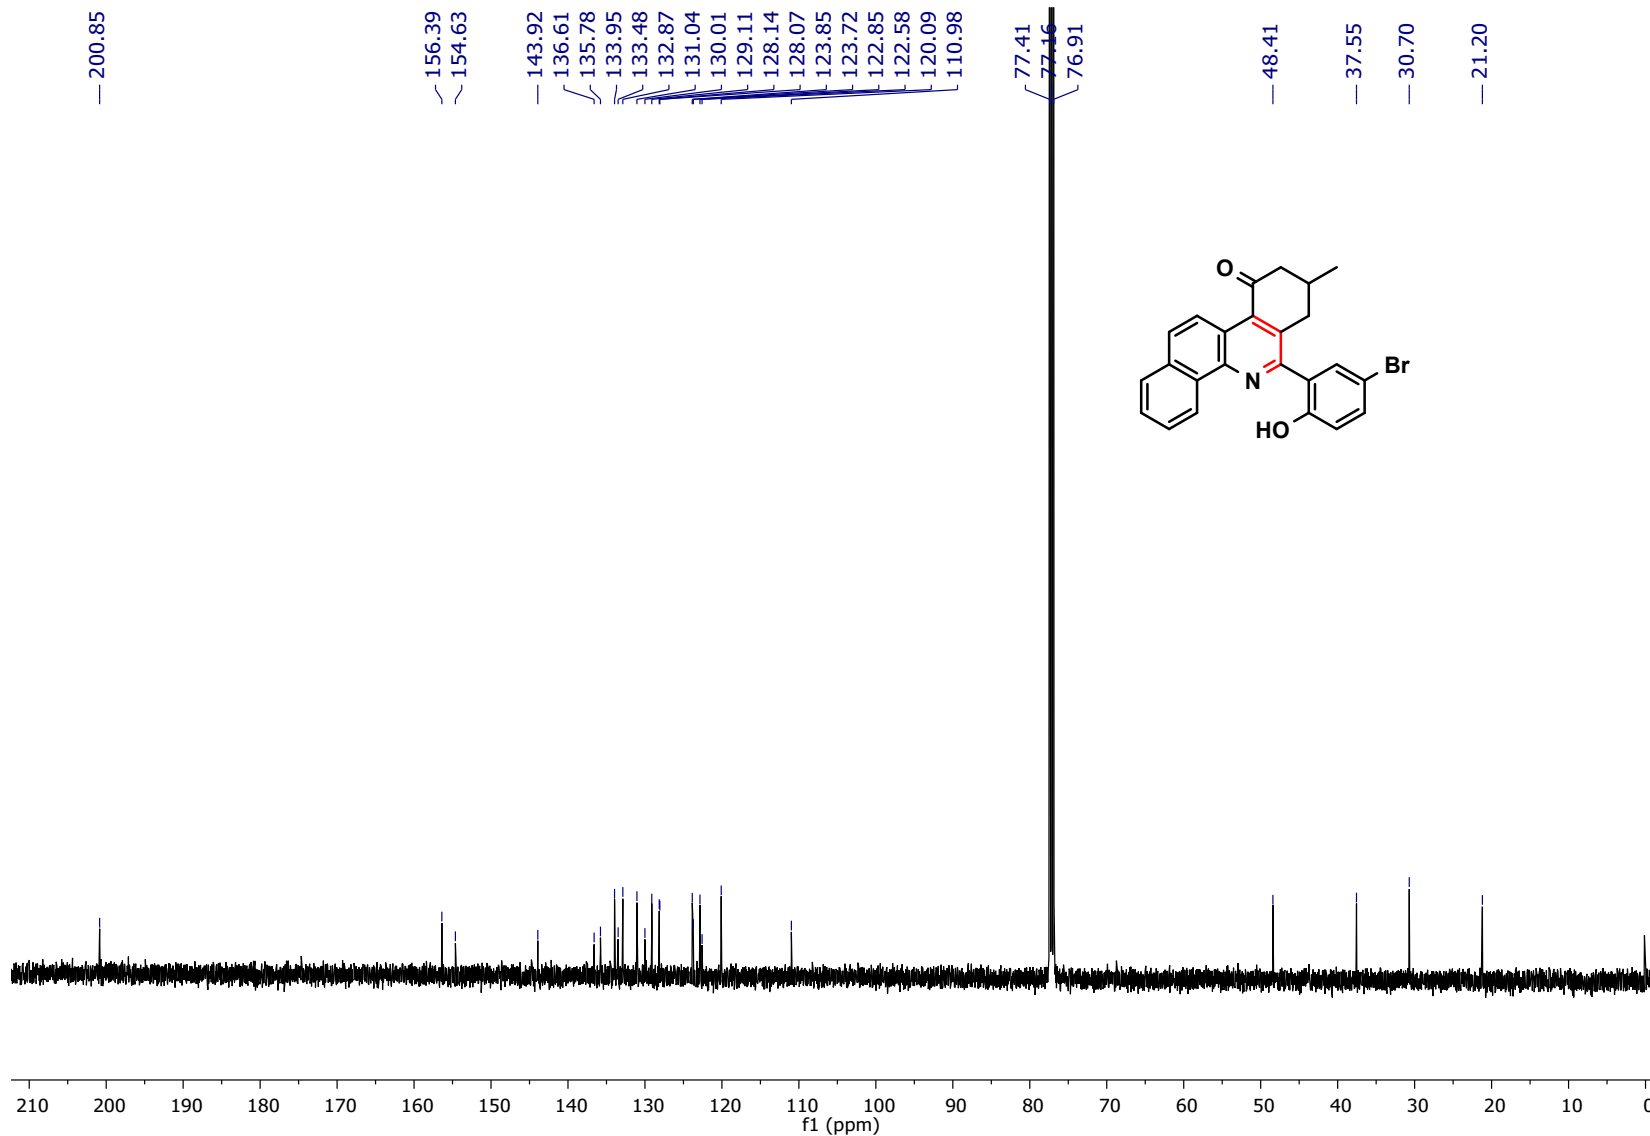

# HRMS Spectrum of Compound 4x

**Sample Name**  
**User Name**  
**Sample Type**  
**ACQ Method**

WASH  
Sample  
ESI ALS 100-1000.m

**Position**  
**Inj Vol**  
**IRM Calibration Status**  
**Comment**

P2-A4  
20  
Success

**Instrument Name**  
**InjPosition**  
**Data Filename**  
**Acquired Time**

Instrument 1  
SY-PG9-A.d  
31-Aug-21 05:53:06 PM (UTC+05:30)

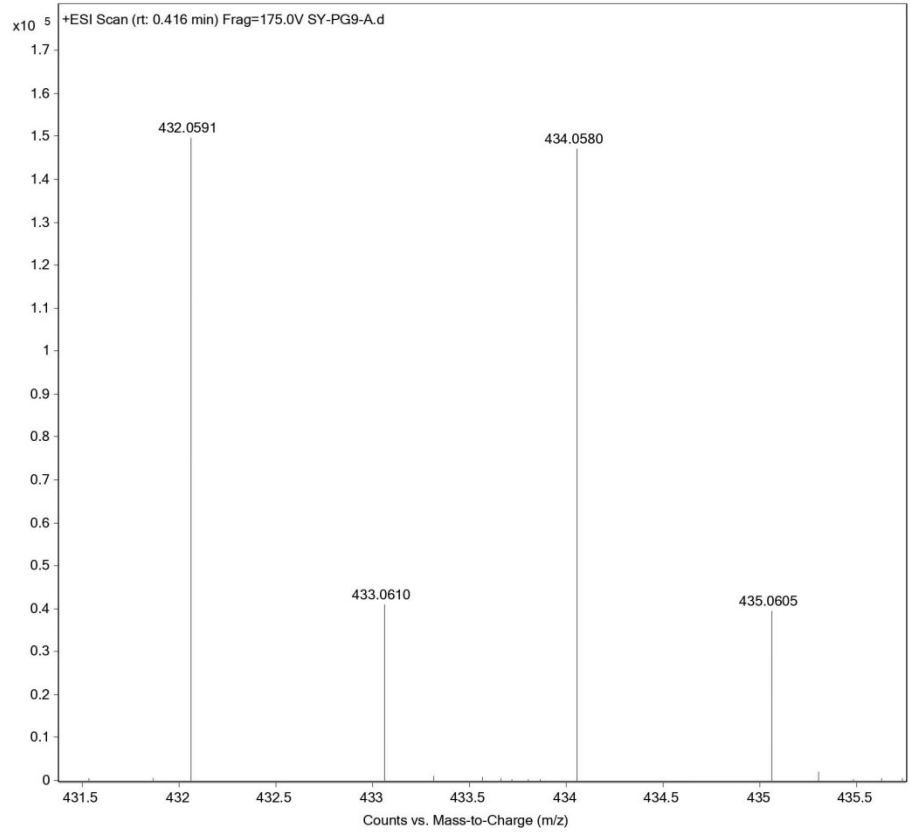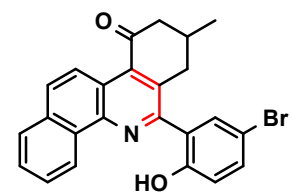

# <sup>1</sup>H NMR Spectrum of Compound 4y

ATK-SY-P43-1H.1.fid — ATK-SY-P43-1H

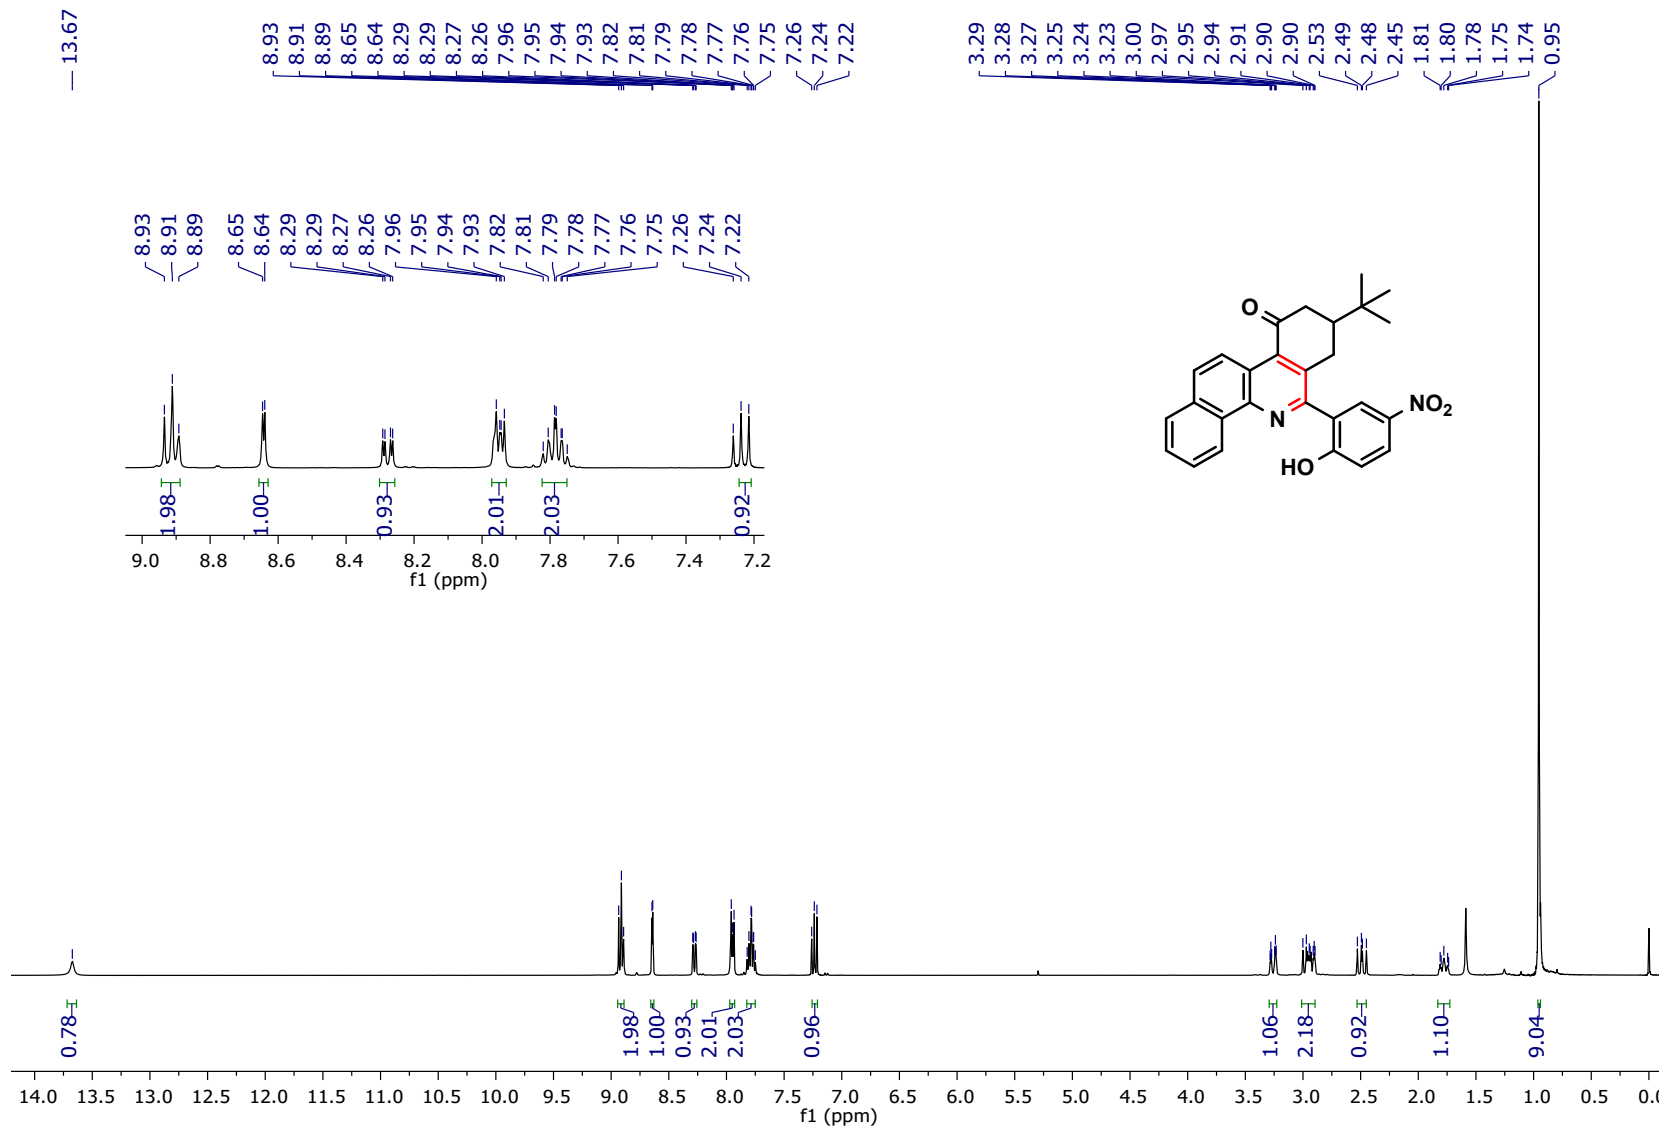

# <sup>13</sup>C NMR Spectrum of Compound 4y

ATK-SY-P43-13C.1.fid — ATK-SY-P43-13C

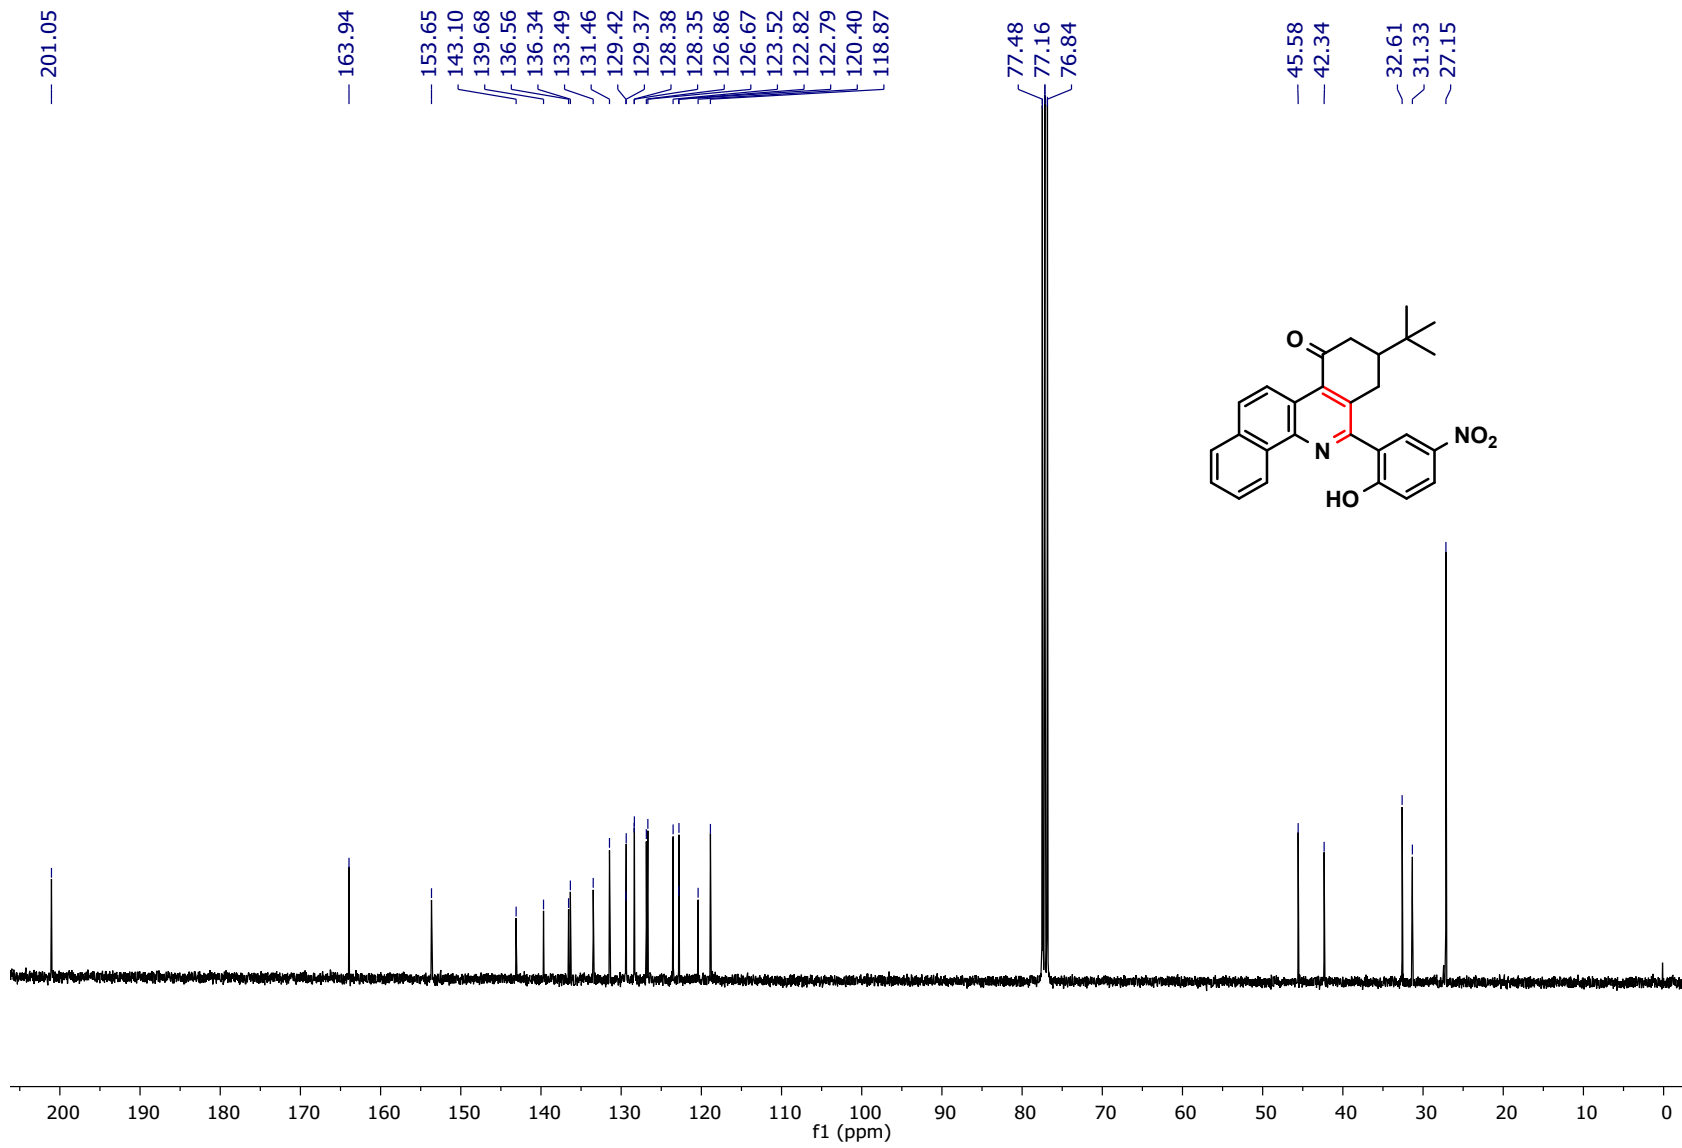

## HRMS Spectrum of Compound 4y

|             |                   |                        |         |                 |                                 |
|-------------|-------------------|------------------------|---------|-----------------|---------------------------------|
| Sample Name | SAMPLE 17         | Position               | P2-B8   | Instrument Name | Instrument 1                    |
| User Name   |                   | Inj Vol                | 20      | InjPosition     |                                 |
| Sample Type | Sample            | IRM Calibration Status | Success | Data Filename   | SY-P43-A.d                      |
| ACQ Method  | ESI ALS 100-600.m | Comment                |         | Acquired Time   | 31-03-2021 20:34:37 (UTC+05:30) |

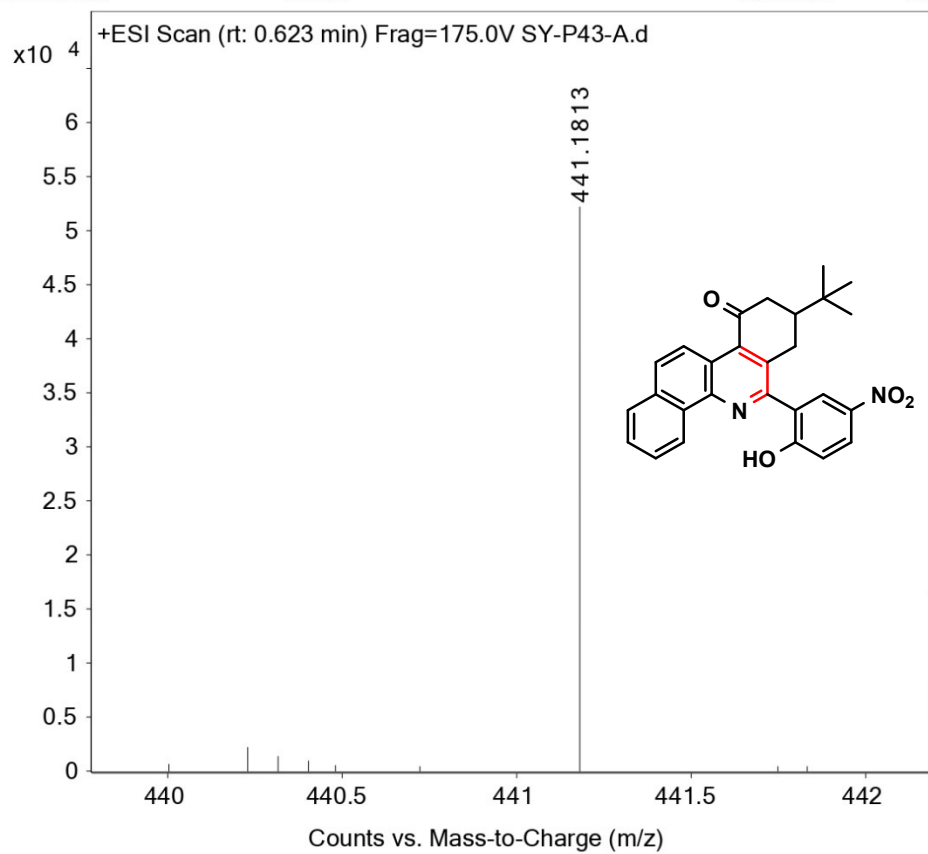



# <sup>1</sup>H NMR Spectrum of Compound 4z

ATK-SY-P45-1H.5.fid — ATK-SY-P45-1H

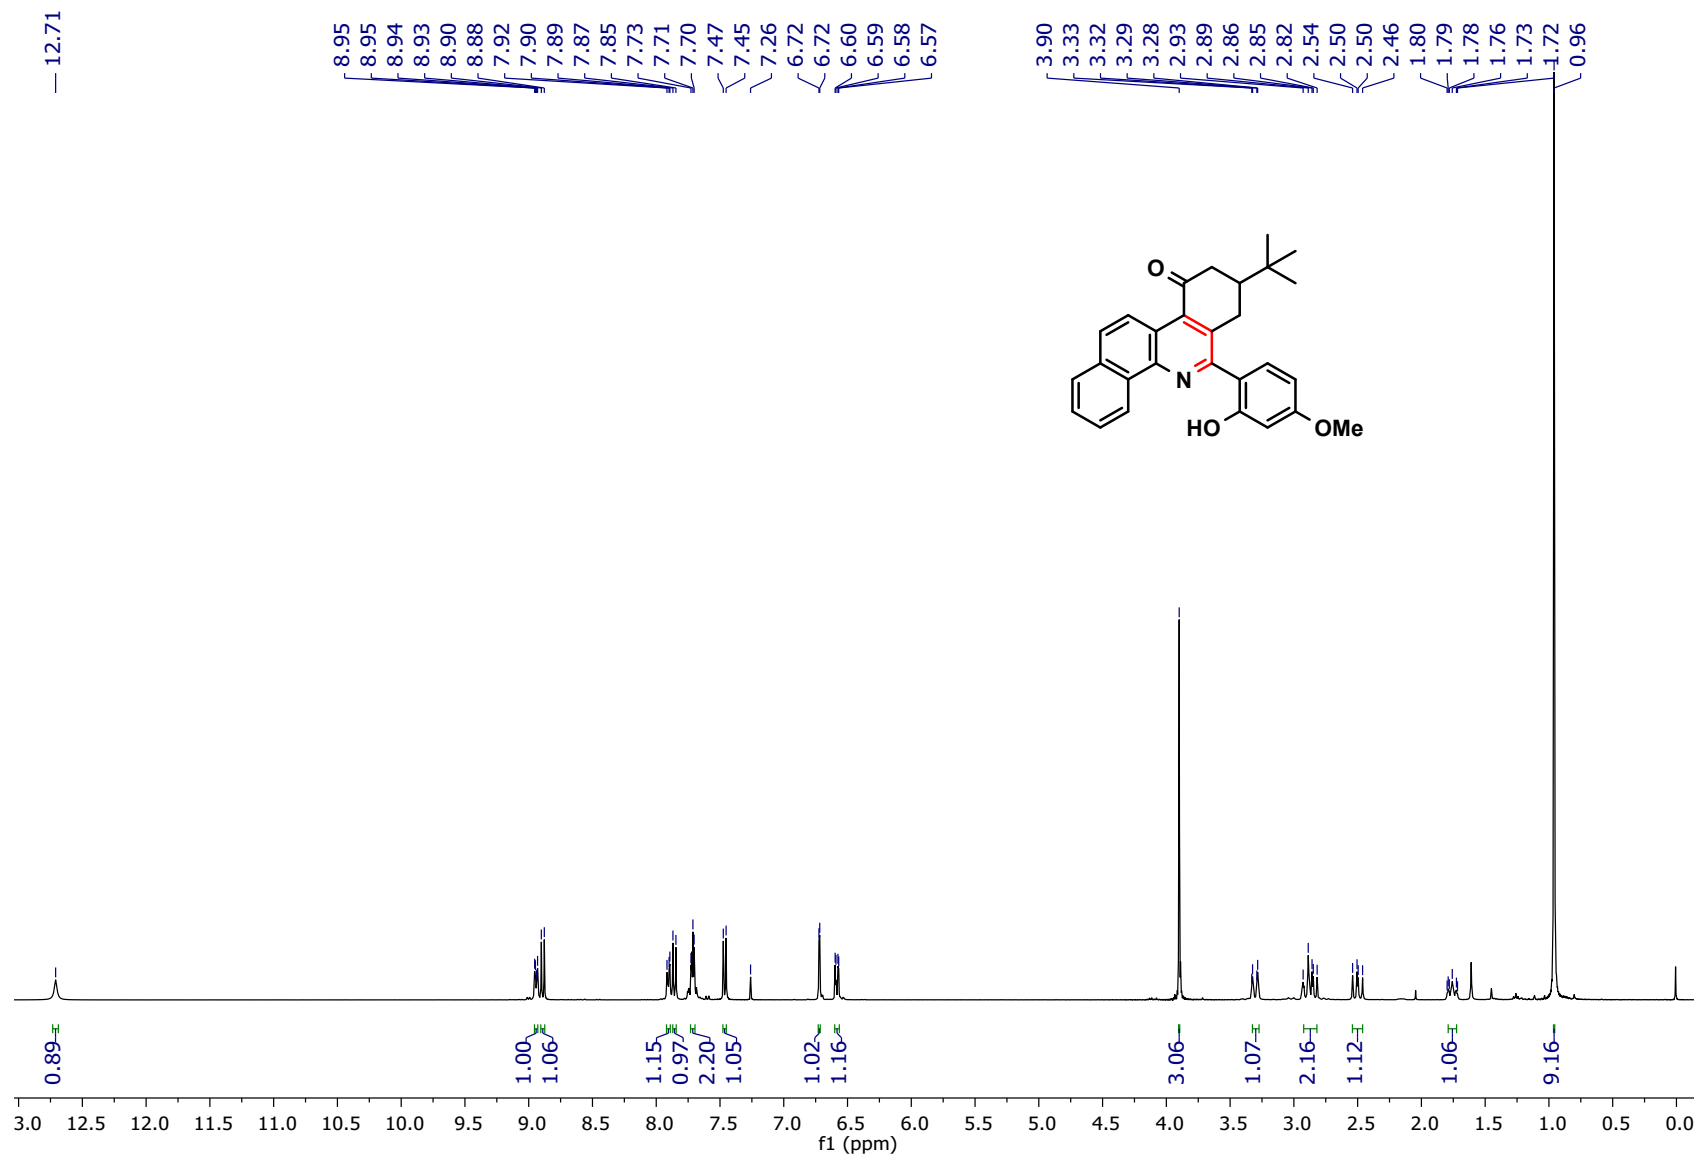

# <sup>13</sup>C NMR Spectrum of Compound 4z

ATK-SY-P45-13C.7.fid — ATK-SY-P45-13C

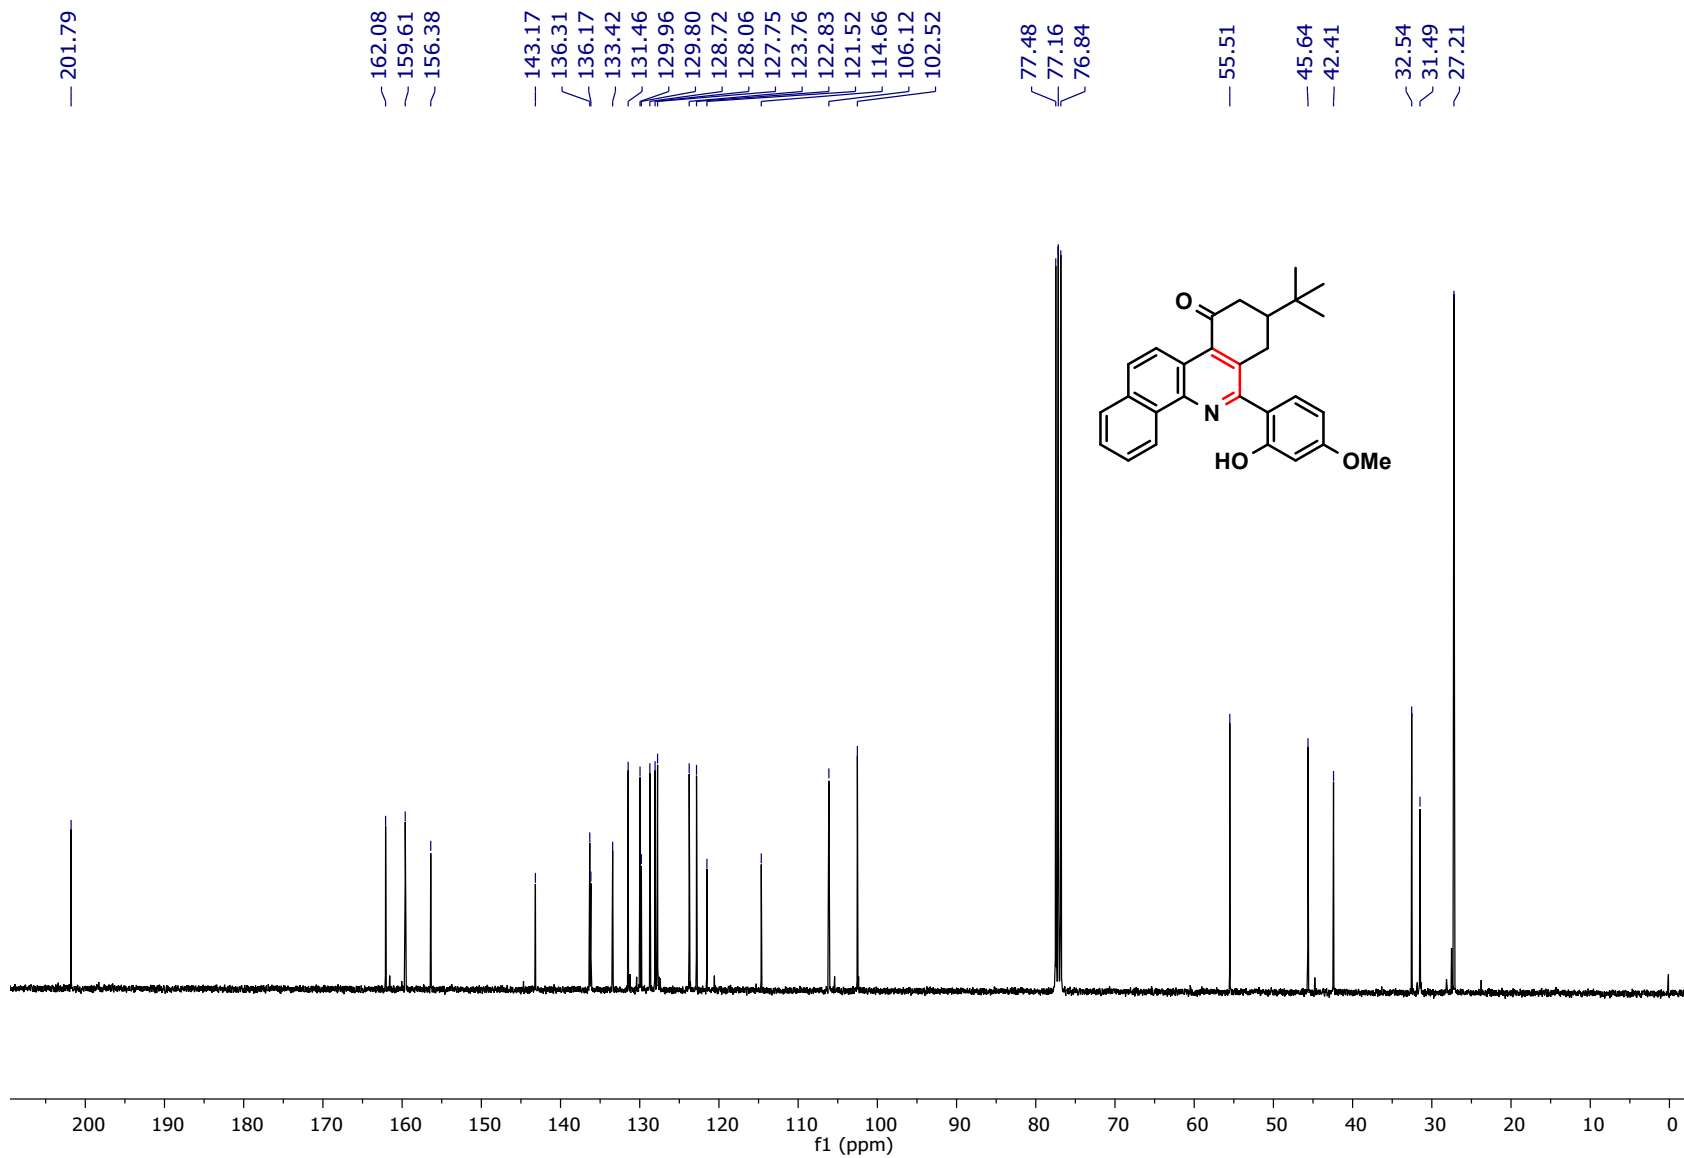

## HRMS Spectrum of Compound 4z

|                    |                    |                               |         |                        |                                 |
|--------------------|--------------------|-------------------------------|---------|------------------------|---------------------------------|
| <b>Sample Name</b> | SAMPLE             | <b>Position</b>               | P1-D3   | <b>Instrument Name</b> | Instrument 1                    |
| <b>User Name</b>   |                    | <b>Inj Vol</b>                | 20      | <b>InjPosition</b>     |                                 |
| <b>Sample Type</b> | Sample             | <b>IRM Calibration Status</b> | Success | <b>Data Filename</b>   | SY-P45.d                        |
| <b>ACQ Method</b>  | ESI ALS 100-1000.m | <b>Comment</b>                |         | <b>Acquired Time</b>   | 27-02-2021 00:52:43 (UTC+05:30) |

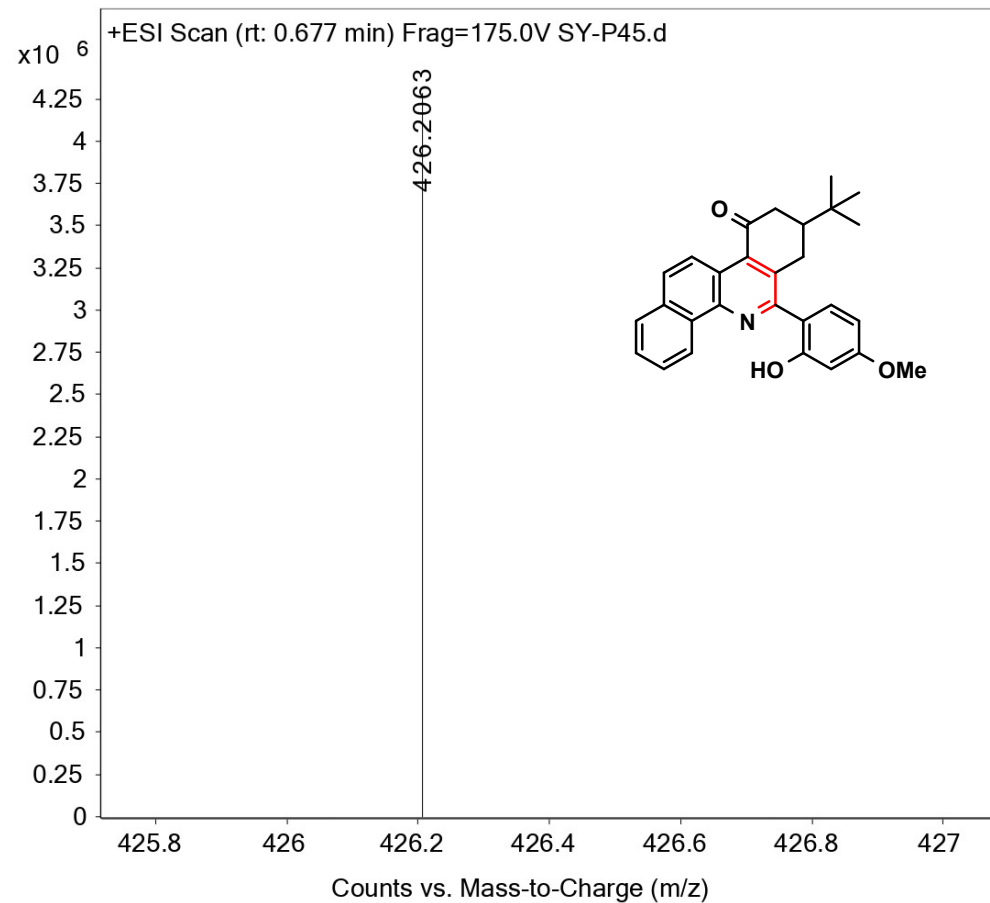

# <sup>1</sup>H NMR Spectrum of Compound 4aa

ATK-SY-P40-1H.1.fid — ATK-SY-P40-1H

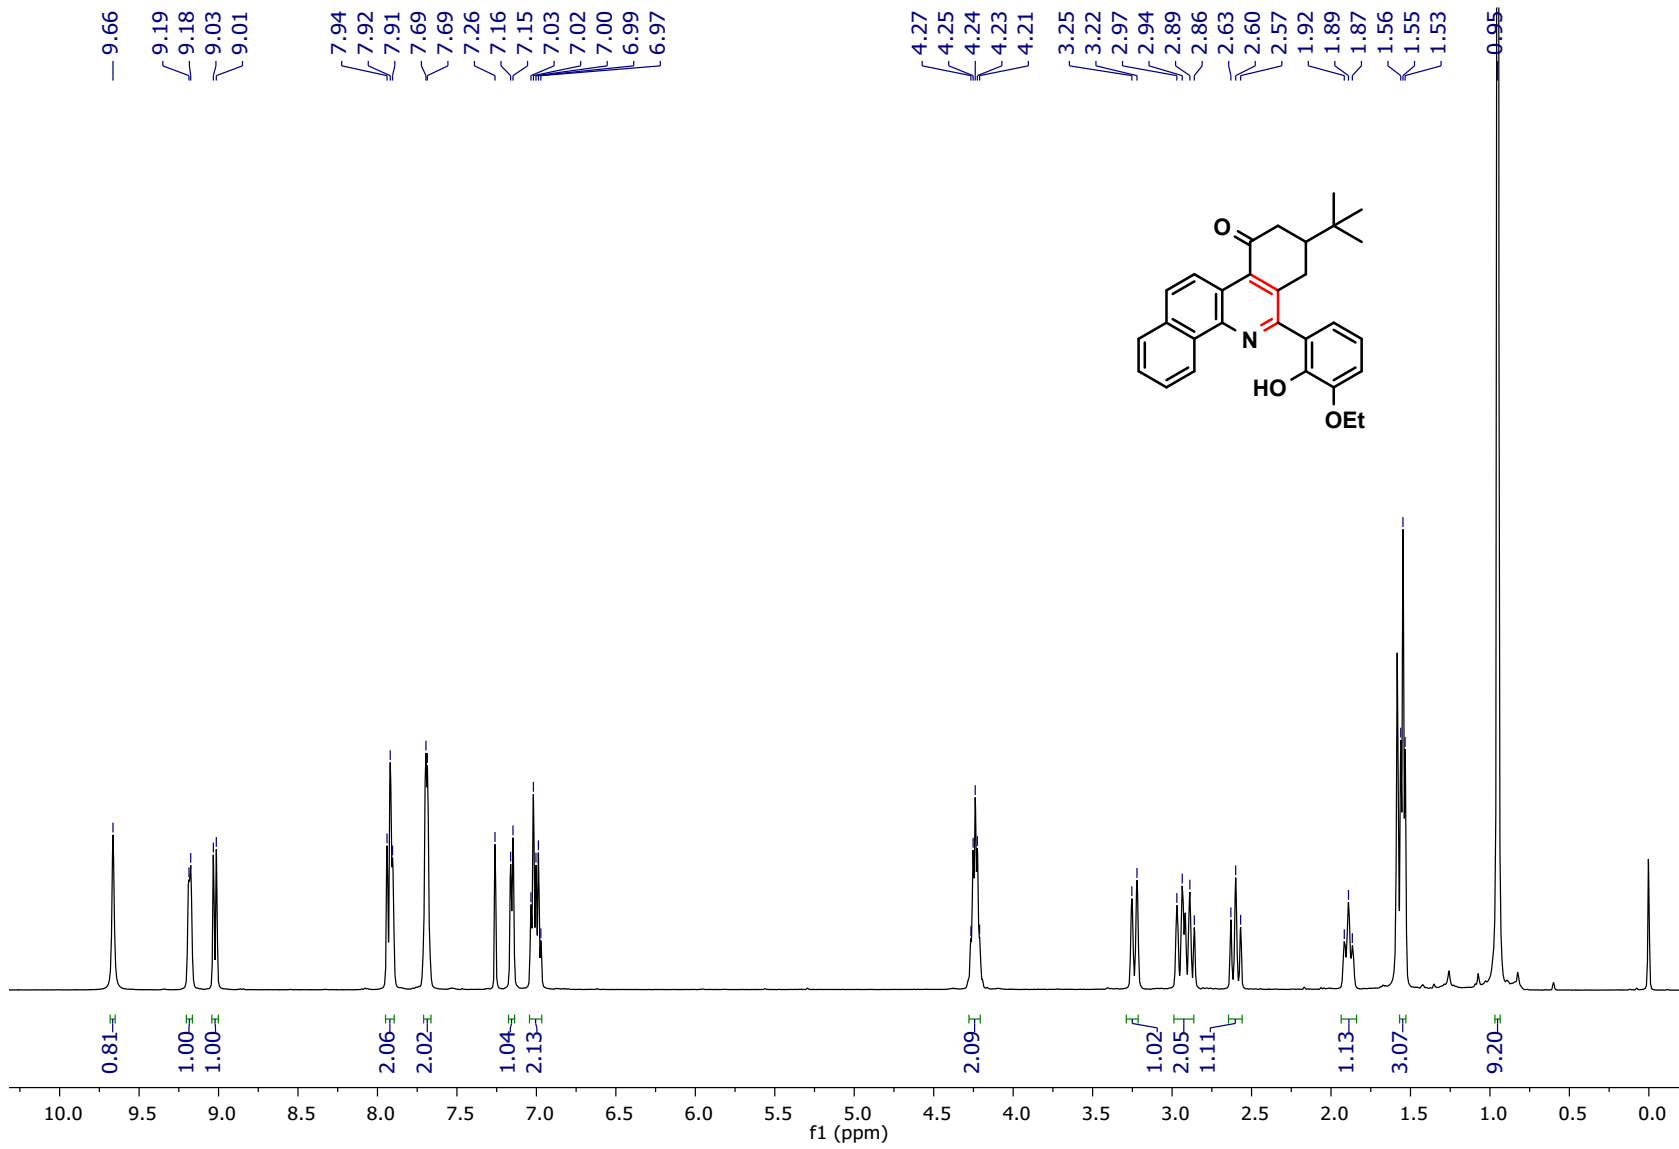

# <sup>13</sup>C NMR Spectrum of Compound 4aa

ATK-SY-P40-13C.1.fid — ATK-SY-P40-13C

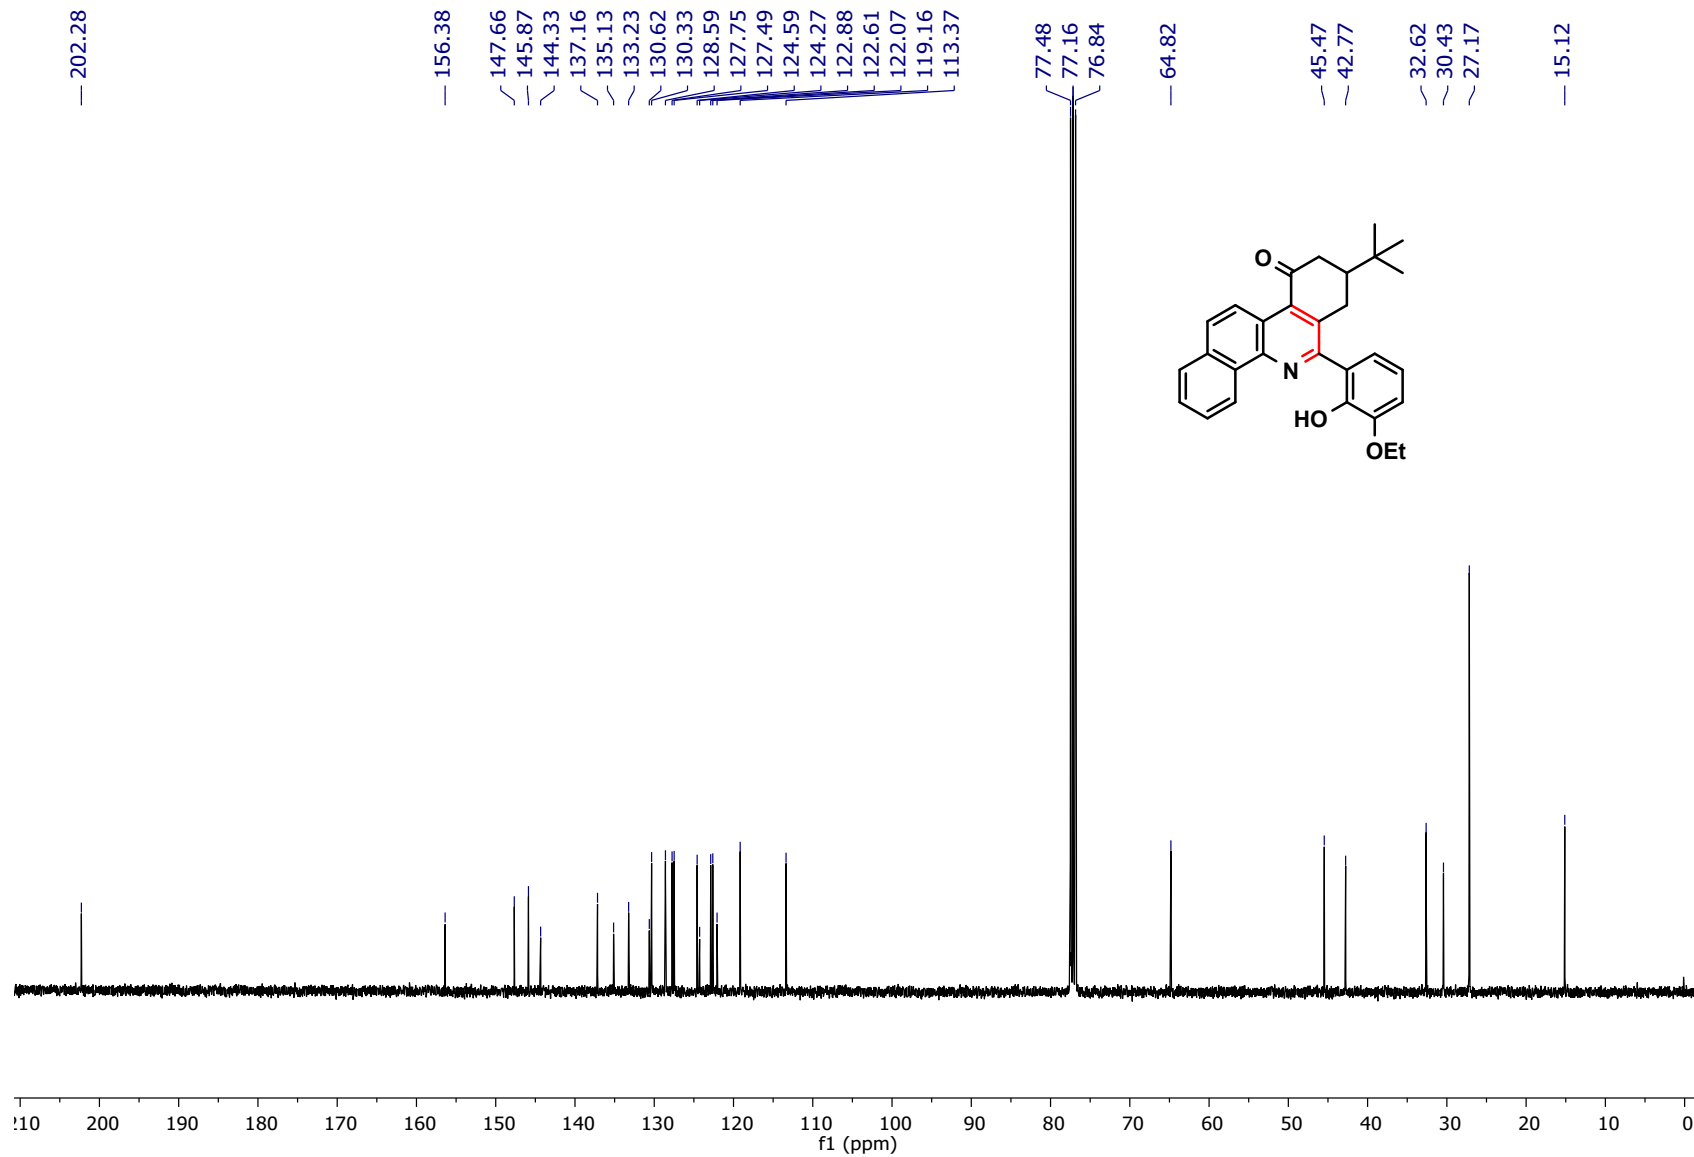

# HRMS Spectrum of Compound 4aa

|                    |                    |                               |         |                        |                                 |
|--------------------|--------------------|-------------------------------|---------|------------------------|---------------------------------|
| <b>Sample Name</b> | SAMPLE             | <b>Position</b>               | P1-E2   | <b>Instrument Name</b> | Instrument 1                    |
| <b>User Name</b>   |                    | <b>Inj Vol</b>                | 20      | <b>InjPosition</b>     |                                 |
| <b>Sample Type</b> | Sample             | <b>IRM Calibration Status</b> | Success | <b>Data Filename</b>   | SY-P40.d                        |
| <b>ACQ Method</b>  | ESI ALS 200-1000.m | <b>Comment</b>                |         | <b>Acquired Time</b>   | 27-02-2021 02:45:59 (UTC+05:30) |

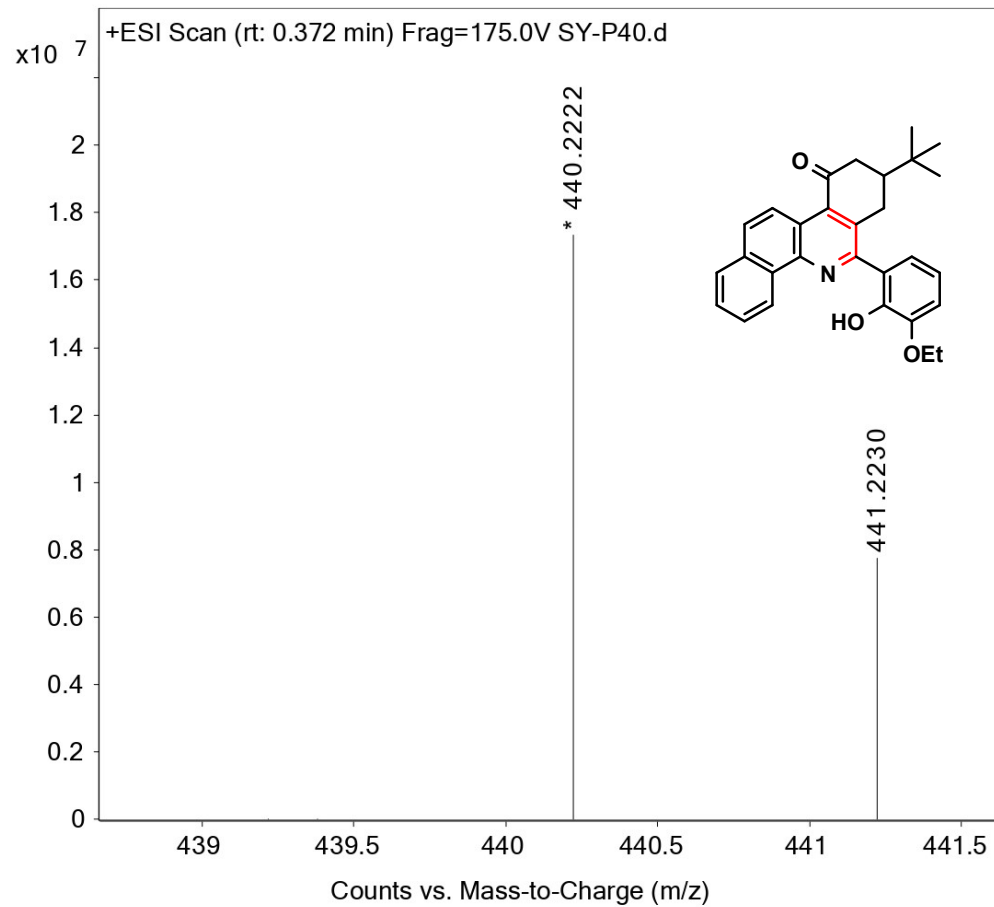

# <sup>1</sup>H NMR Spectrum of Compound 6a

ATK-SY-261120B-1H — 1H —

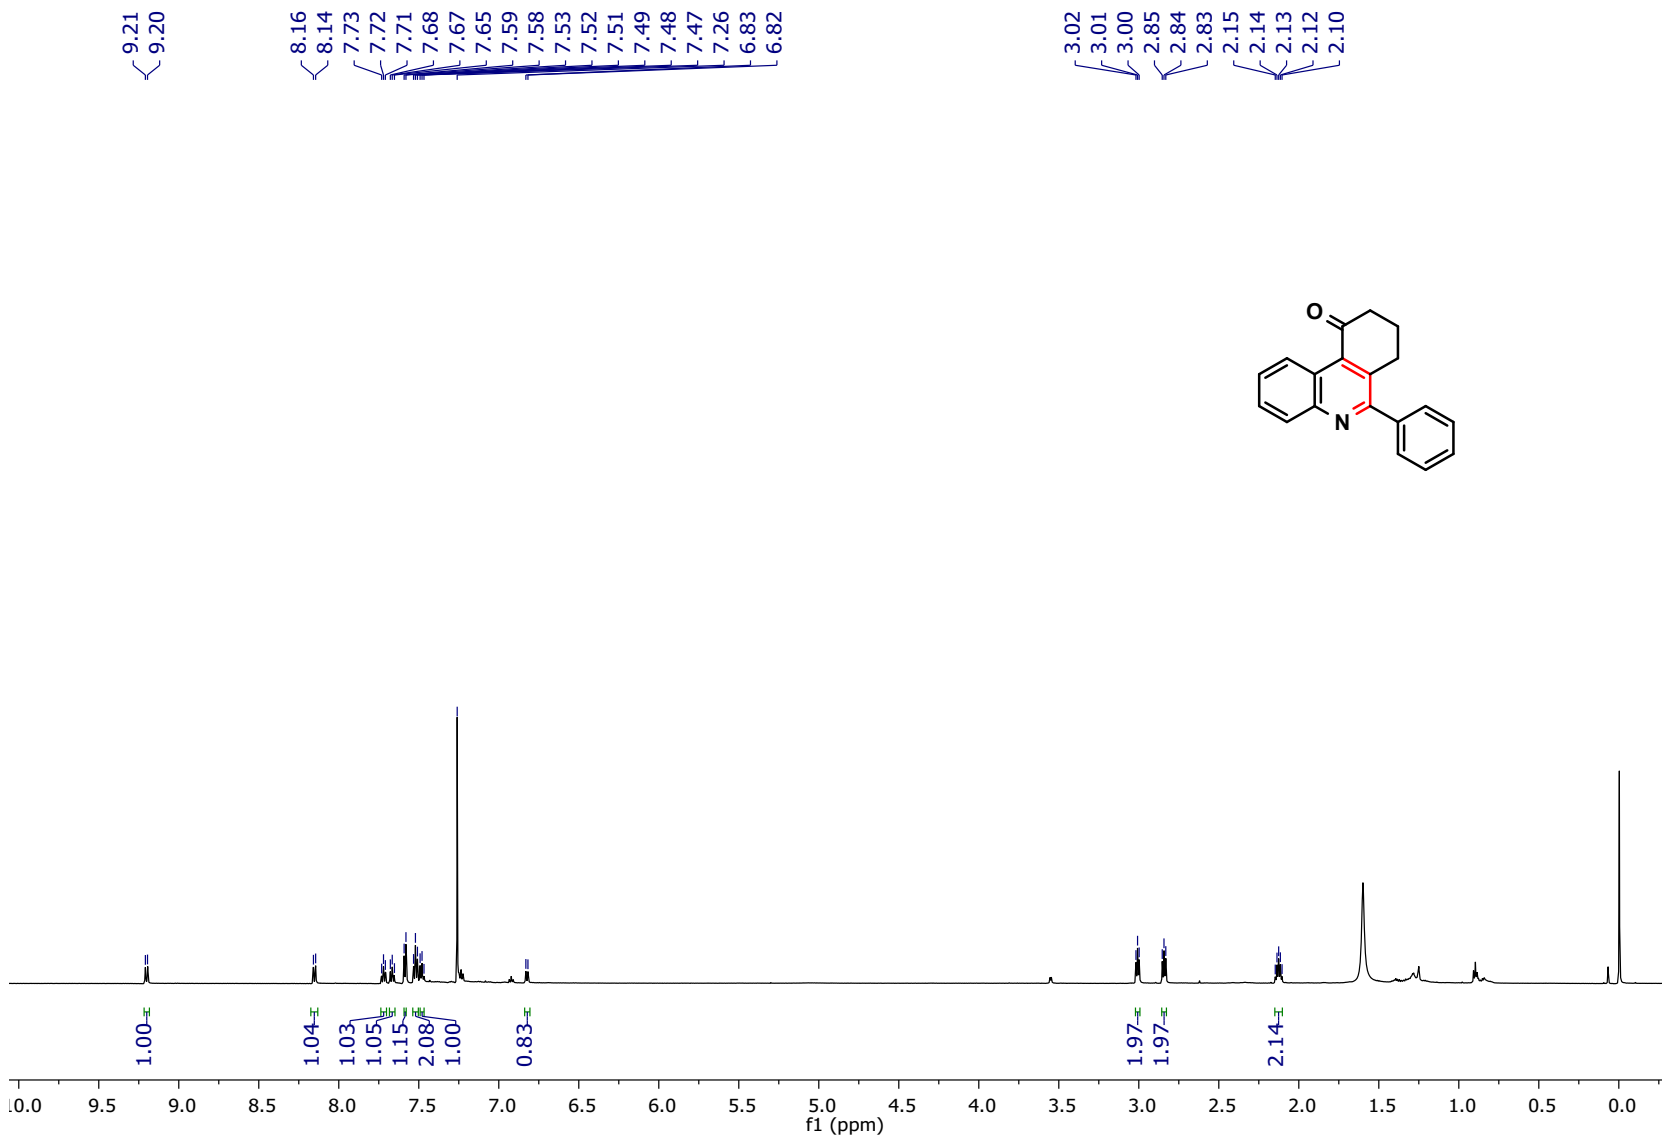

# <sup>13</sup>C NMR Spectrum of Compound 6a

ATK-SY-261120B-13C — 13C —

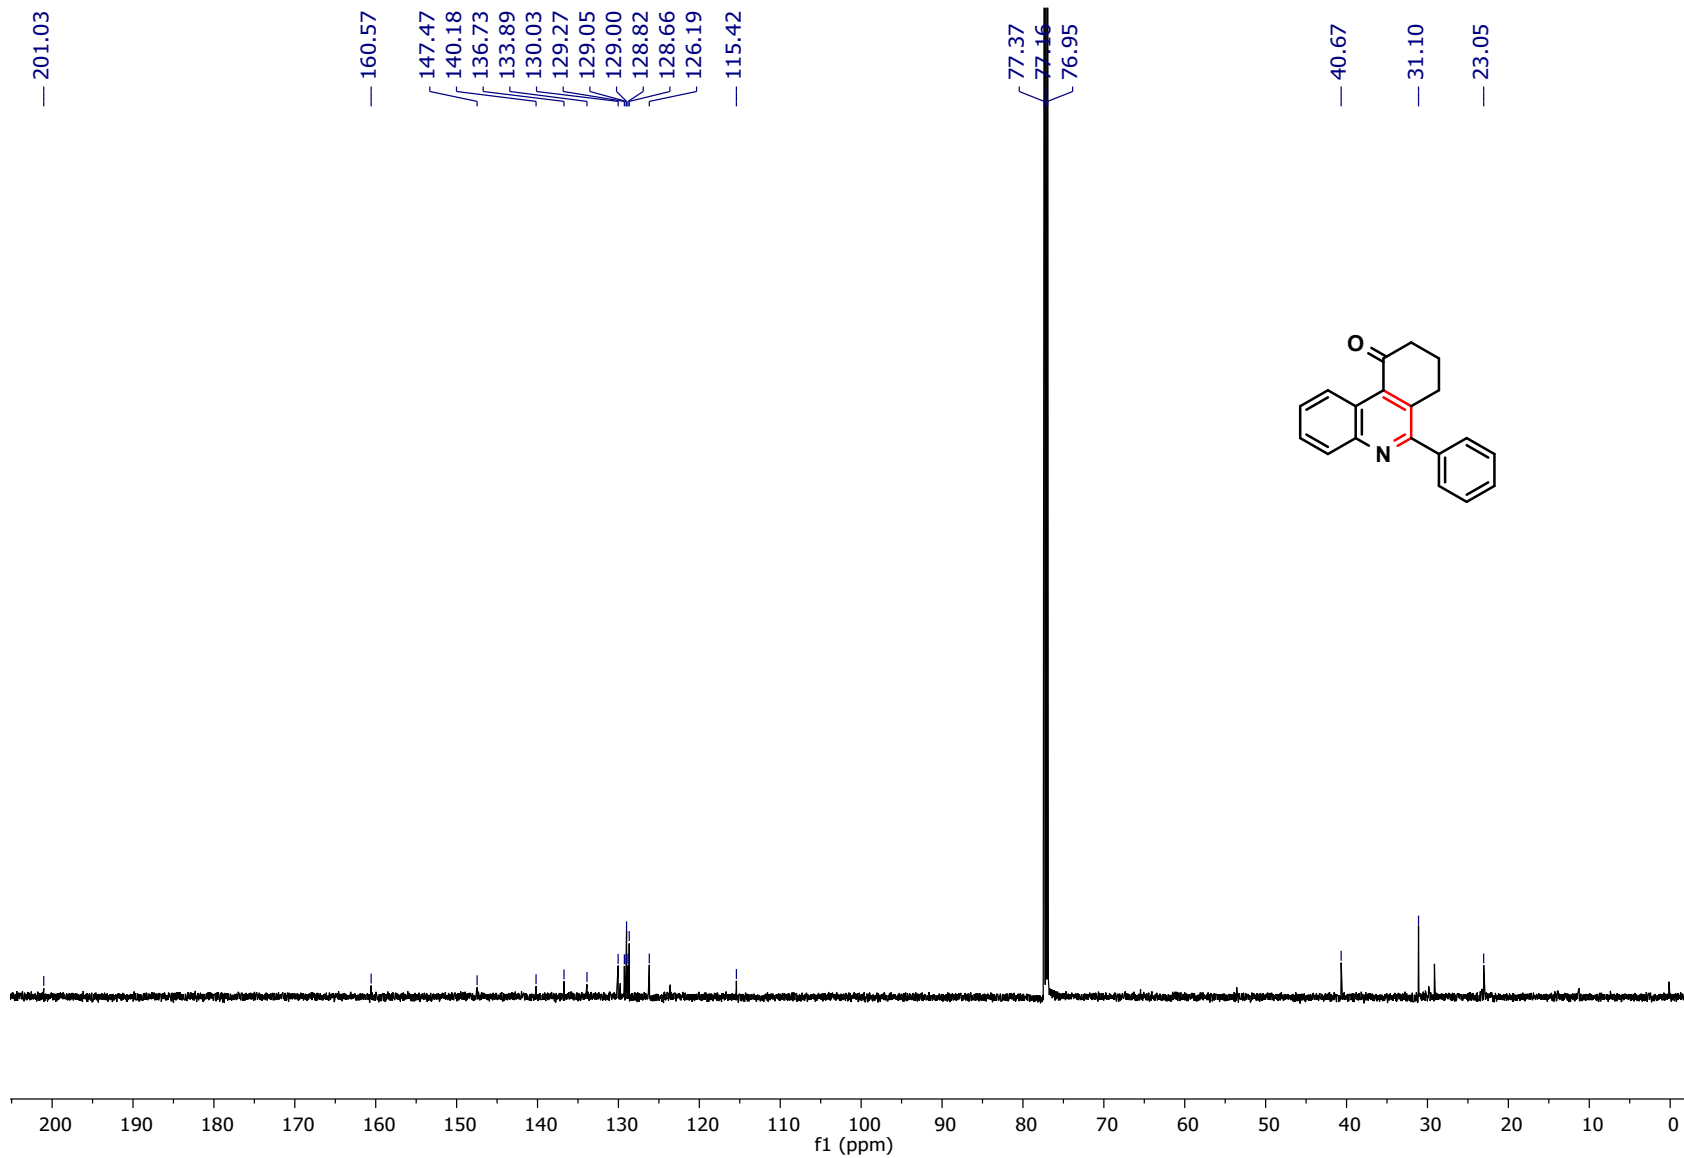



## HRMS Spectrum of Compound 6a

|             |                   |                        |         |                 |                                 |
|-------------|-------------------|------------------------|---------|-----------------|---------------------------------|
| Sample Name | ATK-SY-261120     | Position               | P1-C1   | Instrument Name | Instrument 1                    |
| User Name   |                   | Inj Vol                | 20      | InjPosition     |                                 |
| Sample Type | Sample            | IRM Calibration Status | Success | Data Filename   | ATK-SY-261120.d                 |
| ACQ Method  | ESI ALS 100-600.m | Comment                |         | Acquired Time   | 03-12-2020 12:15:58 (UTC+05:30) |

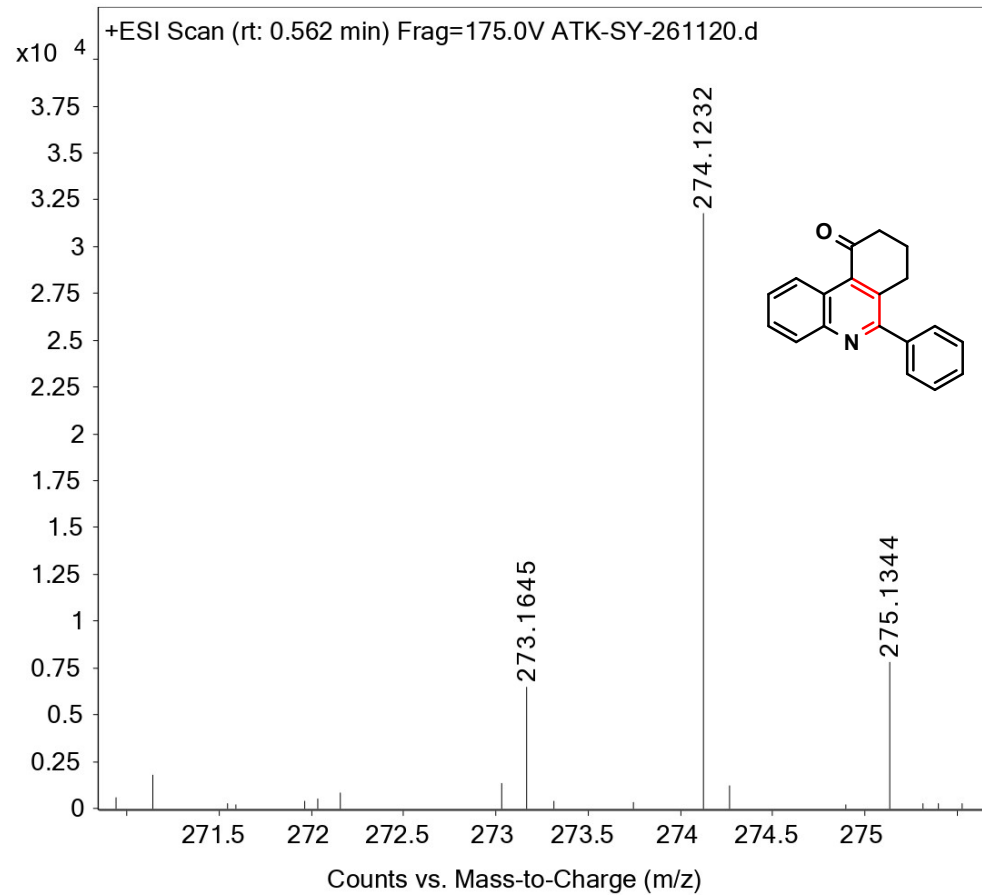

# <sup>1</sup>H NMR Spectrum of Compound 6b

ATK-SY-P24-1H.1.fid — ATK-SY-P24-1H

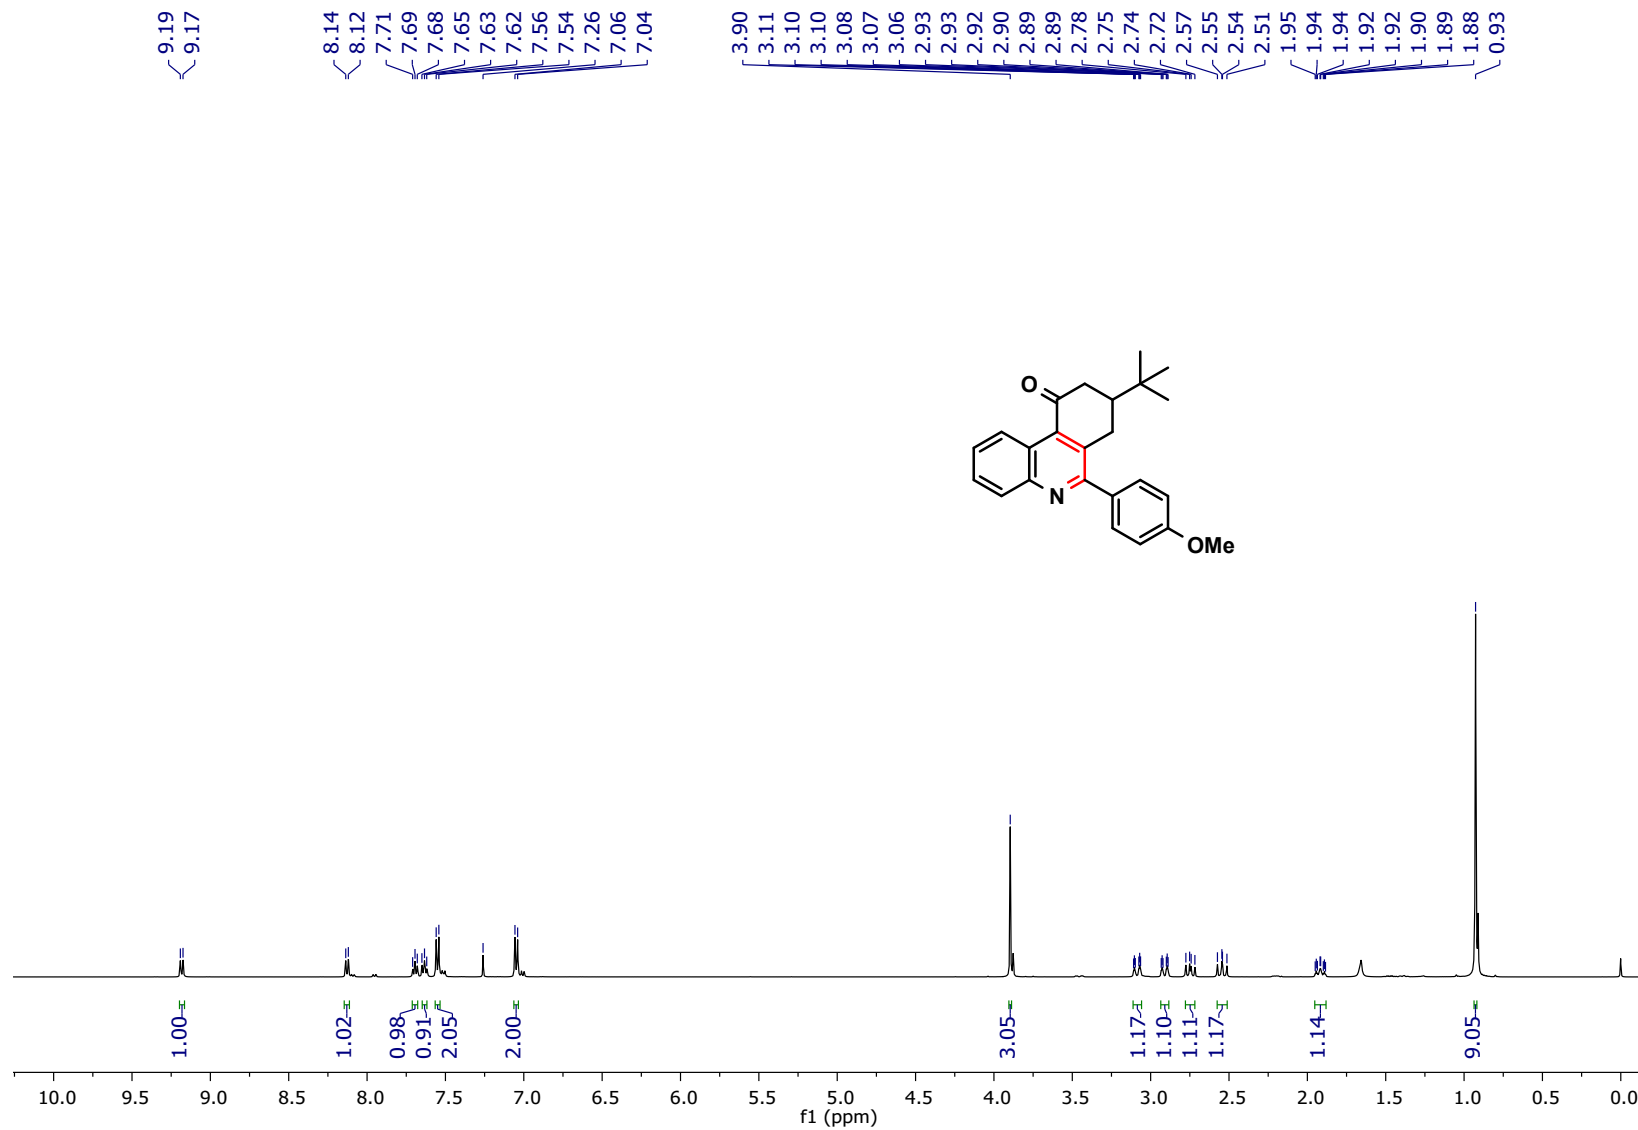

# <sup>13</sup>C NMR Spectrum of Compound 6b

ATK-SY-P24-13C.1.fid — ATK-SY-P24-13C

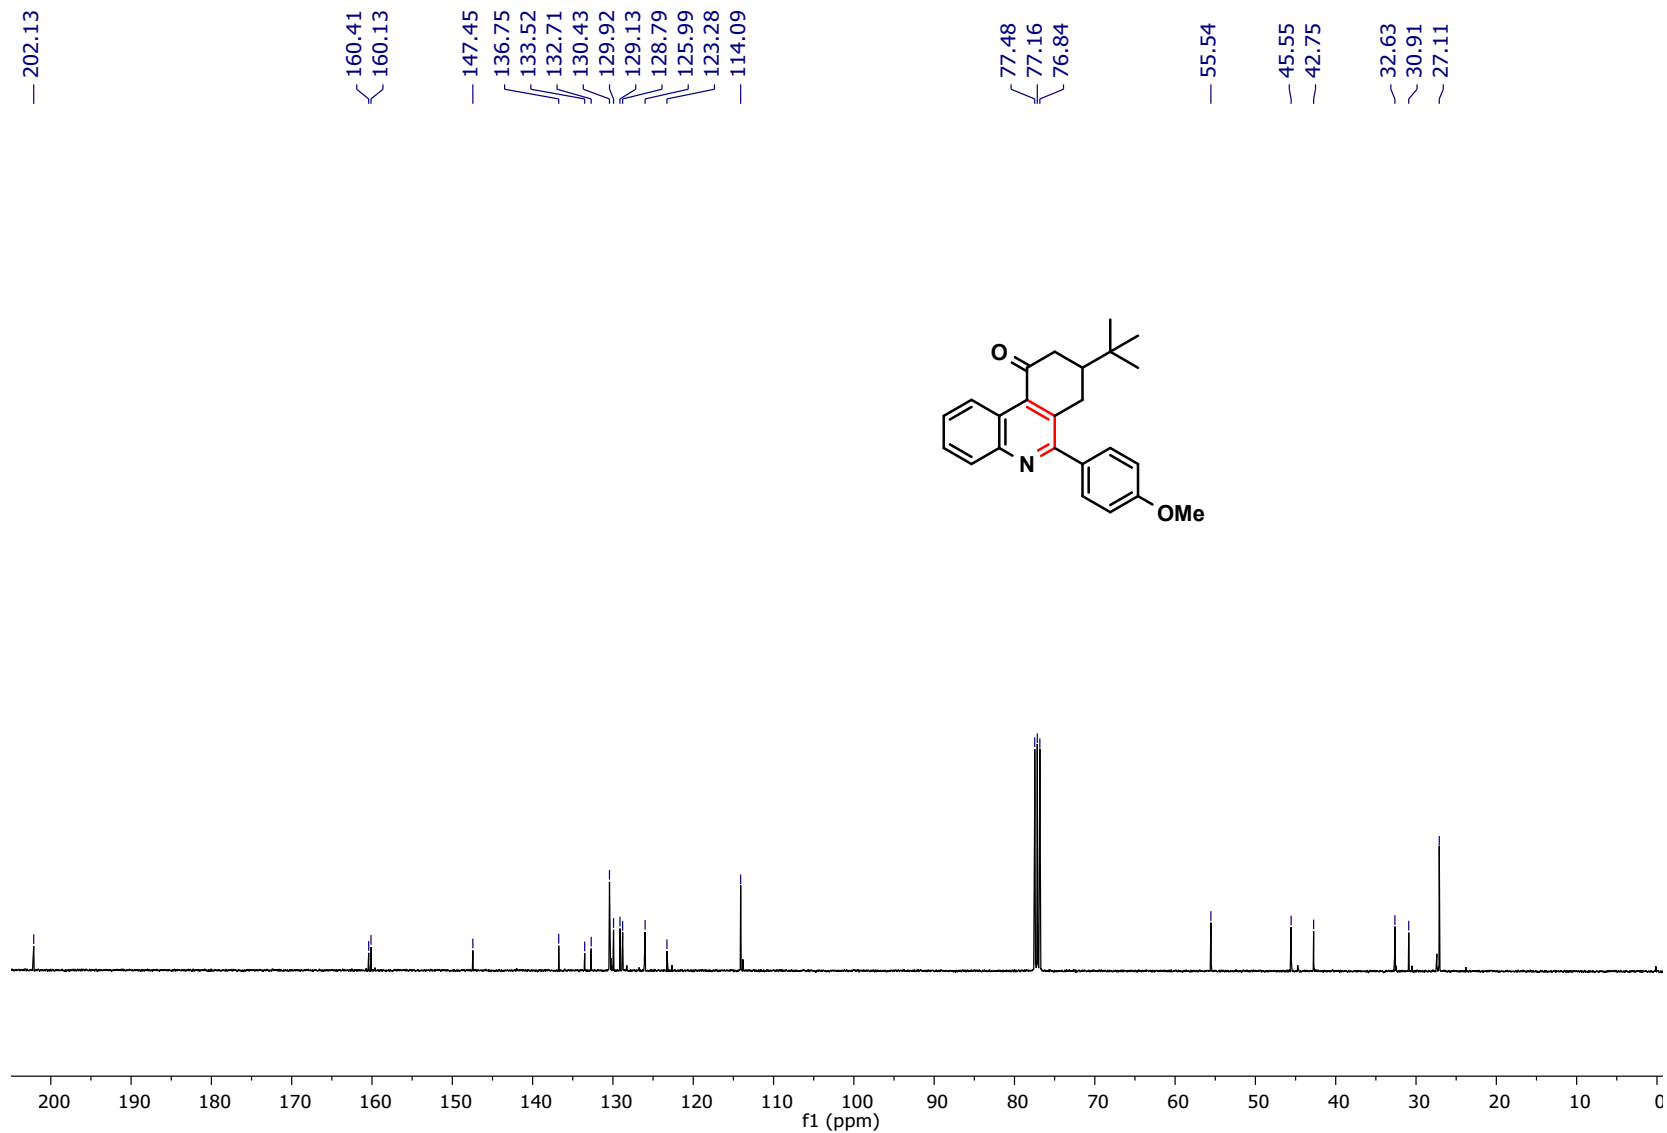

## HRMS Spectrum of Compound 6b

|                    |                   |                               |         |                        |                                   |
|--------------------|-------------------|-------------------------------|---------|------------------------|-----------------------------------|
| <b>Sample Name</b> | WASH              | <b>Position</b>               | P1-C11  | <b>Instrument Name</b> | Instrument 1                      |
| <b>User Name</b>   |                   | <b>Inj Vol</b>                | 20      | <b>InjPosition</b>     |                                   |
| <b>Sample Type</b> | Sample            | <b>IRM Calibration Status</b> | Success | <b>Data Filename</b>   | SY-P24.d                          |
| <b>ACQ Method</b>  | ESI ALS 100-600.m | <b>Comment</b>                |         | <b>Acquired Time</b>   | 26-Aug-21 03:30:53 PM (UTC+05:30) |

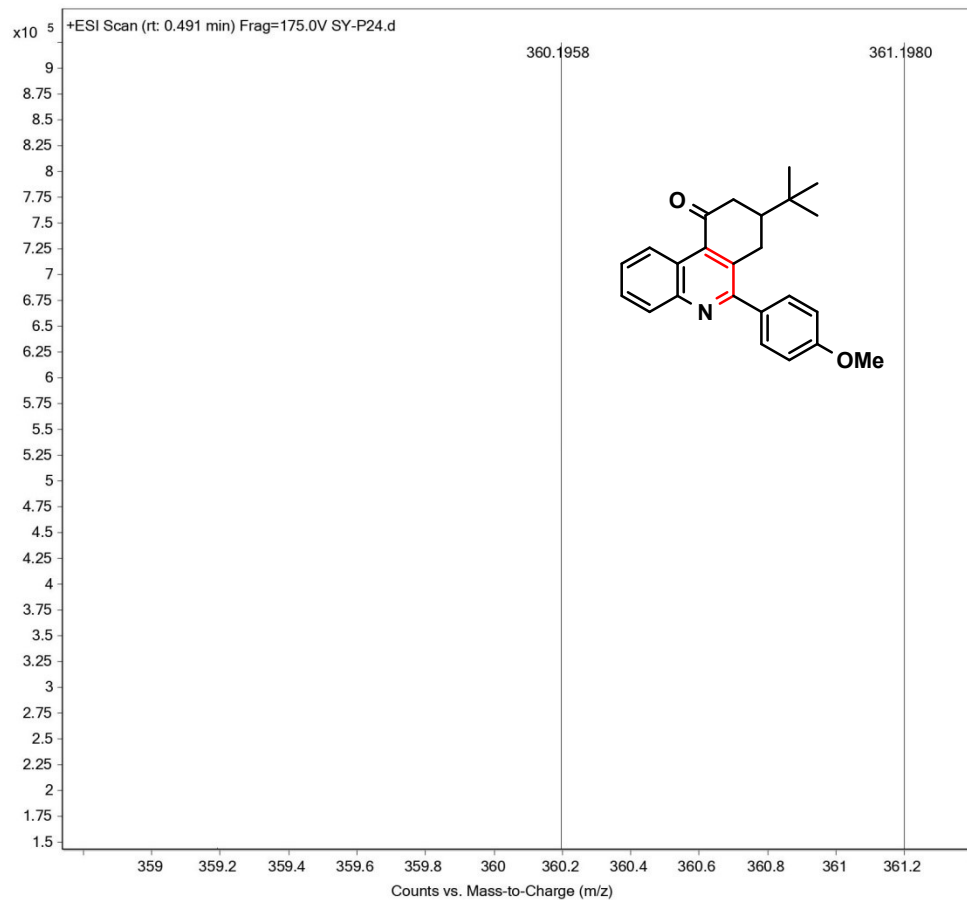

# <sup>1</sup>H NMR Spectrum of Compound 6c

ATK-SY-P48-1H.2.fid  
ATK-SY-P48-1H

8.79  
8.04  
8.02  
8.01  
7.71  
7.69  
7.48  
7.47  
7.45  
7.40  
7.39  
7.37  
7.34  
7.33  
7.32  
7.26

4.00  
2.95  
2.93  
2.91  
2.90  
2.84  
2.82  
2.81  
2.70  
2.69  
2.68  
2.67  
2.18  
2.17  
2.15  
2.14  
2.13

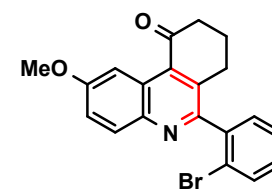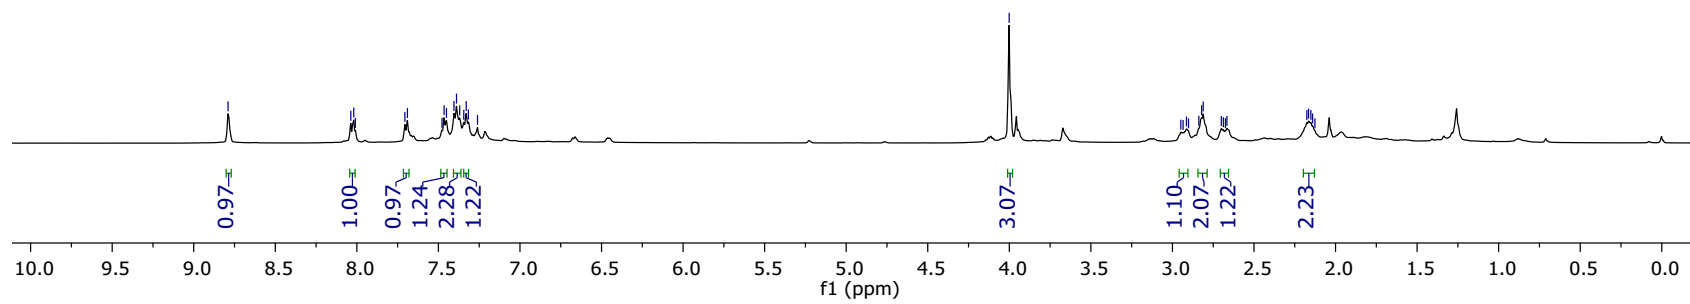

# <sup>13</sup>C NMR Spectrum of Compound 6c

ATK-SY-P48-13C.4.fid — ATK-SY-P48-13C

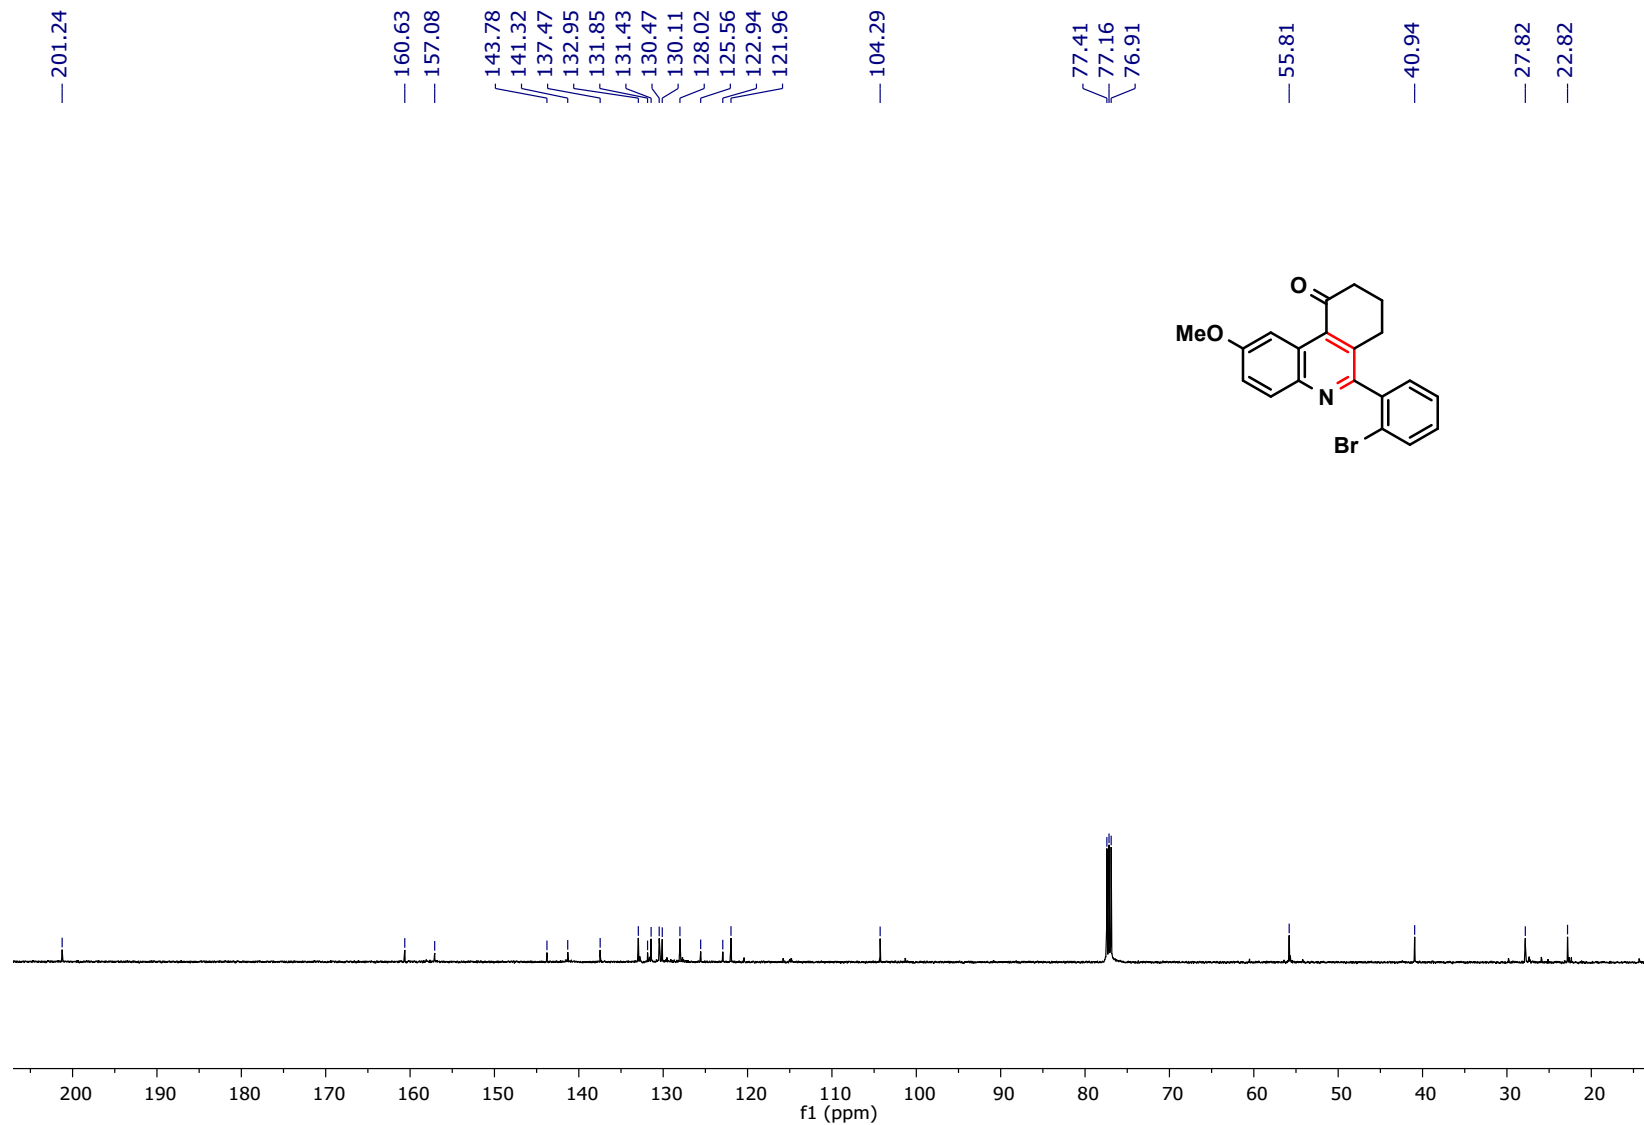

# HRMS Spectrum of Compound 6c

|                    |                   |                               |         |                        |                                   |
|--------------------|-------------------|-------------------------------|---------|------------------------|-----------------------------------|
| <b>Sample Name</b> | WASH              | <b>Position</b>               | P1-C4   | <b>Instrument Name</b> | Instrument 1                      |
| <b>User Name</b>   |                   | <b>Inj Vol</b>                | 20      | <b>InjPosition</b>     |                                   |
| <b>Sample Type</b> | Sample            | <b>IRM Calibration Status</b> | Success | <b>Data Filename</b>   | SY-P48.d                          |
| <b>ACQ Method</b>  | ESI ALS 100-600.m | <b>Comment</b>                |         | <b>Acquired Time</b>   | 26-Aug-21 02:13:44 PM (UTC+05:30) |

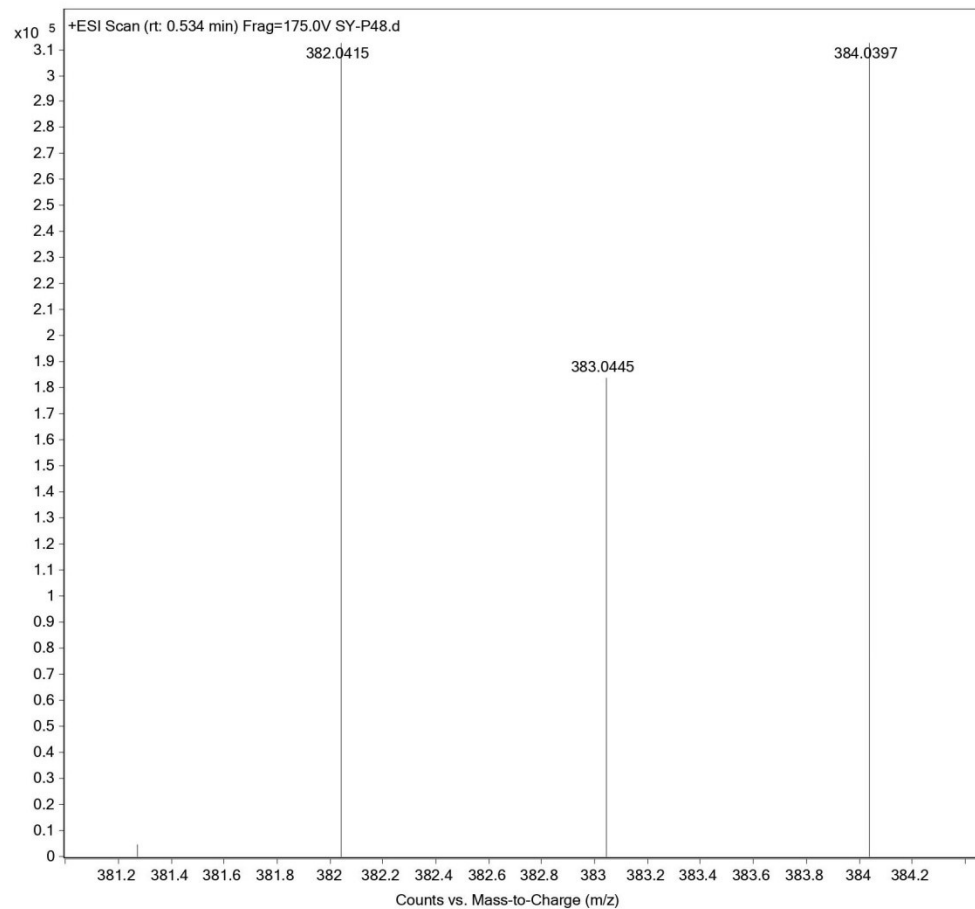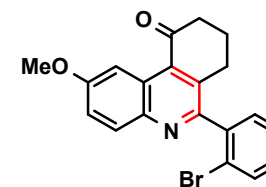

# <sup>1</sup>H NMR Spectrum of Compound 6d

ATK-SY-P48T-B-1H.6276  
1H

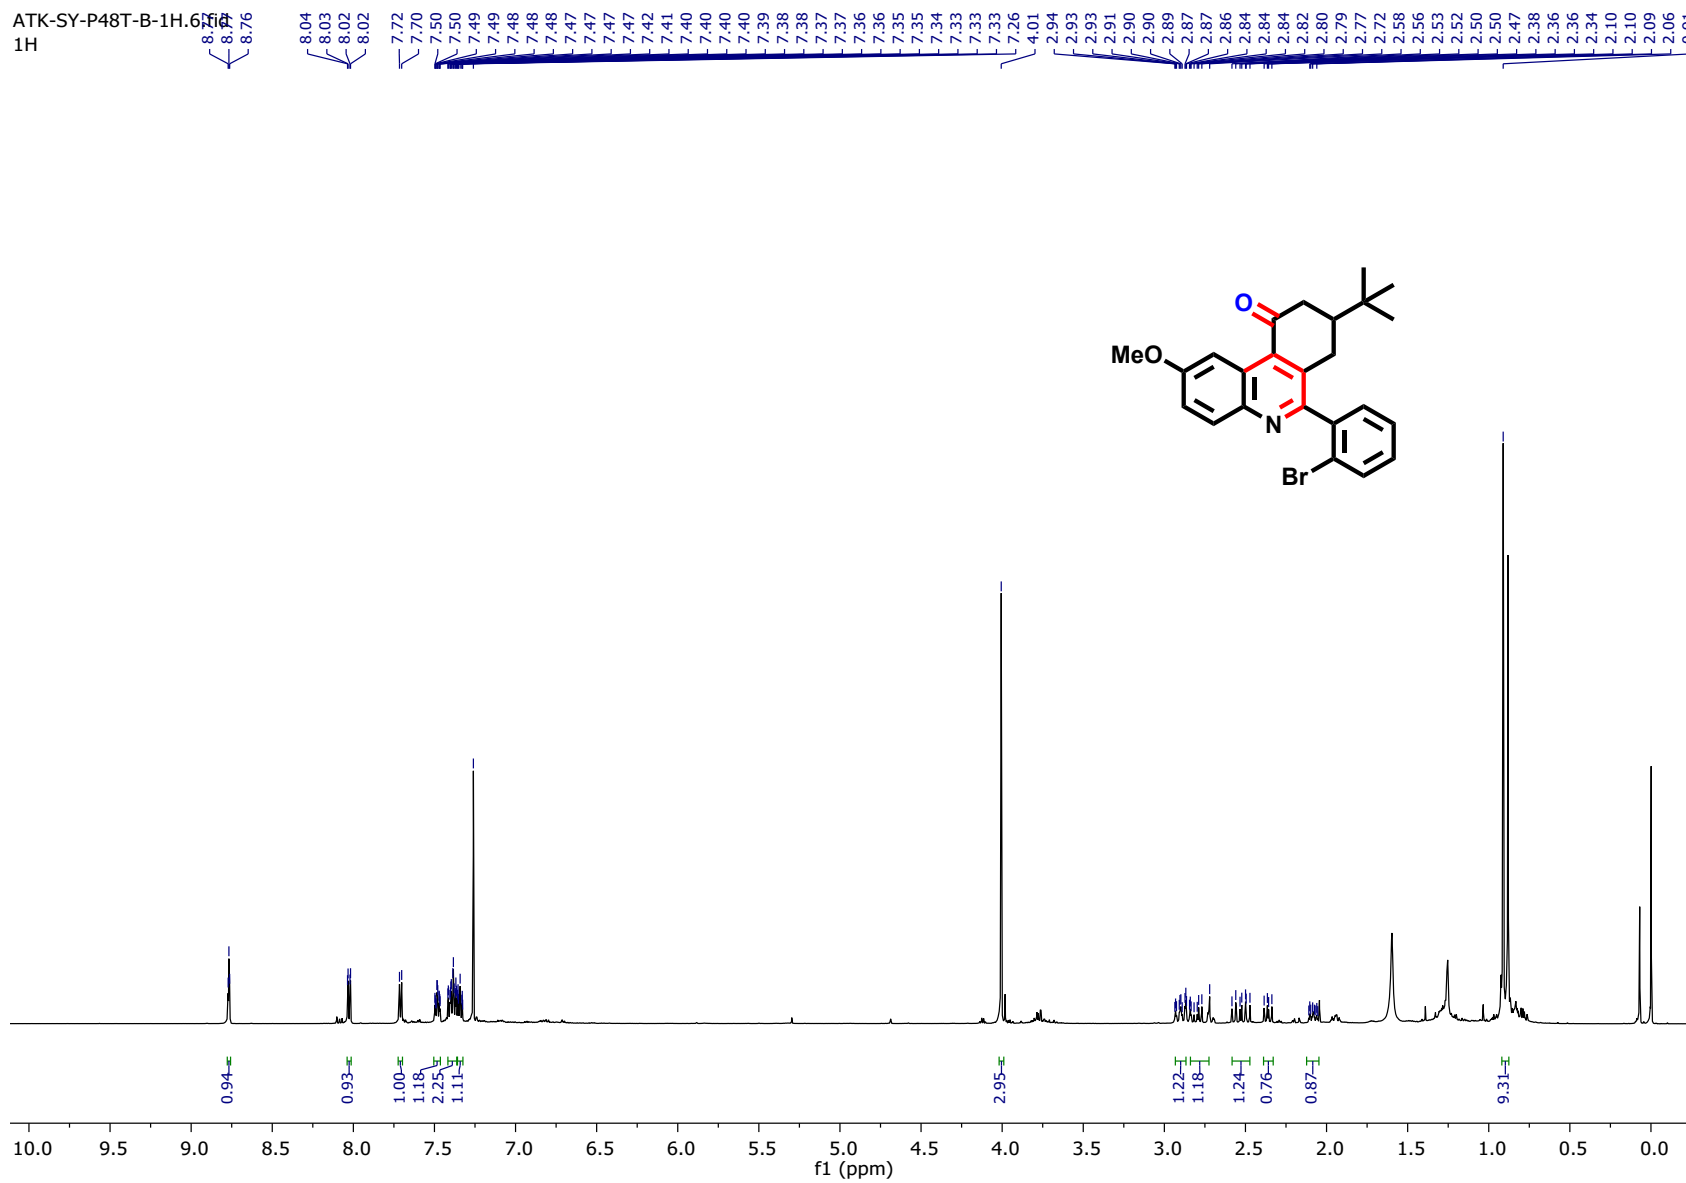



# <sup>13</sup>C NMR Spectrum of Compound 6d

ATK-SY-P48T-B-13C.7.fid — 13C

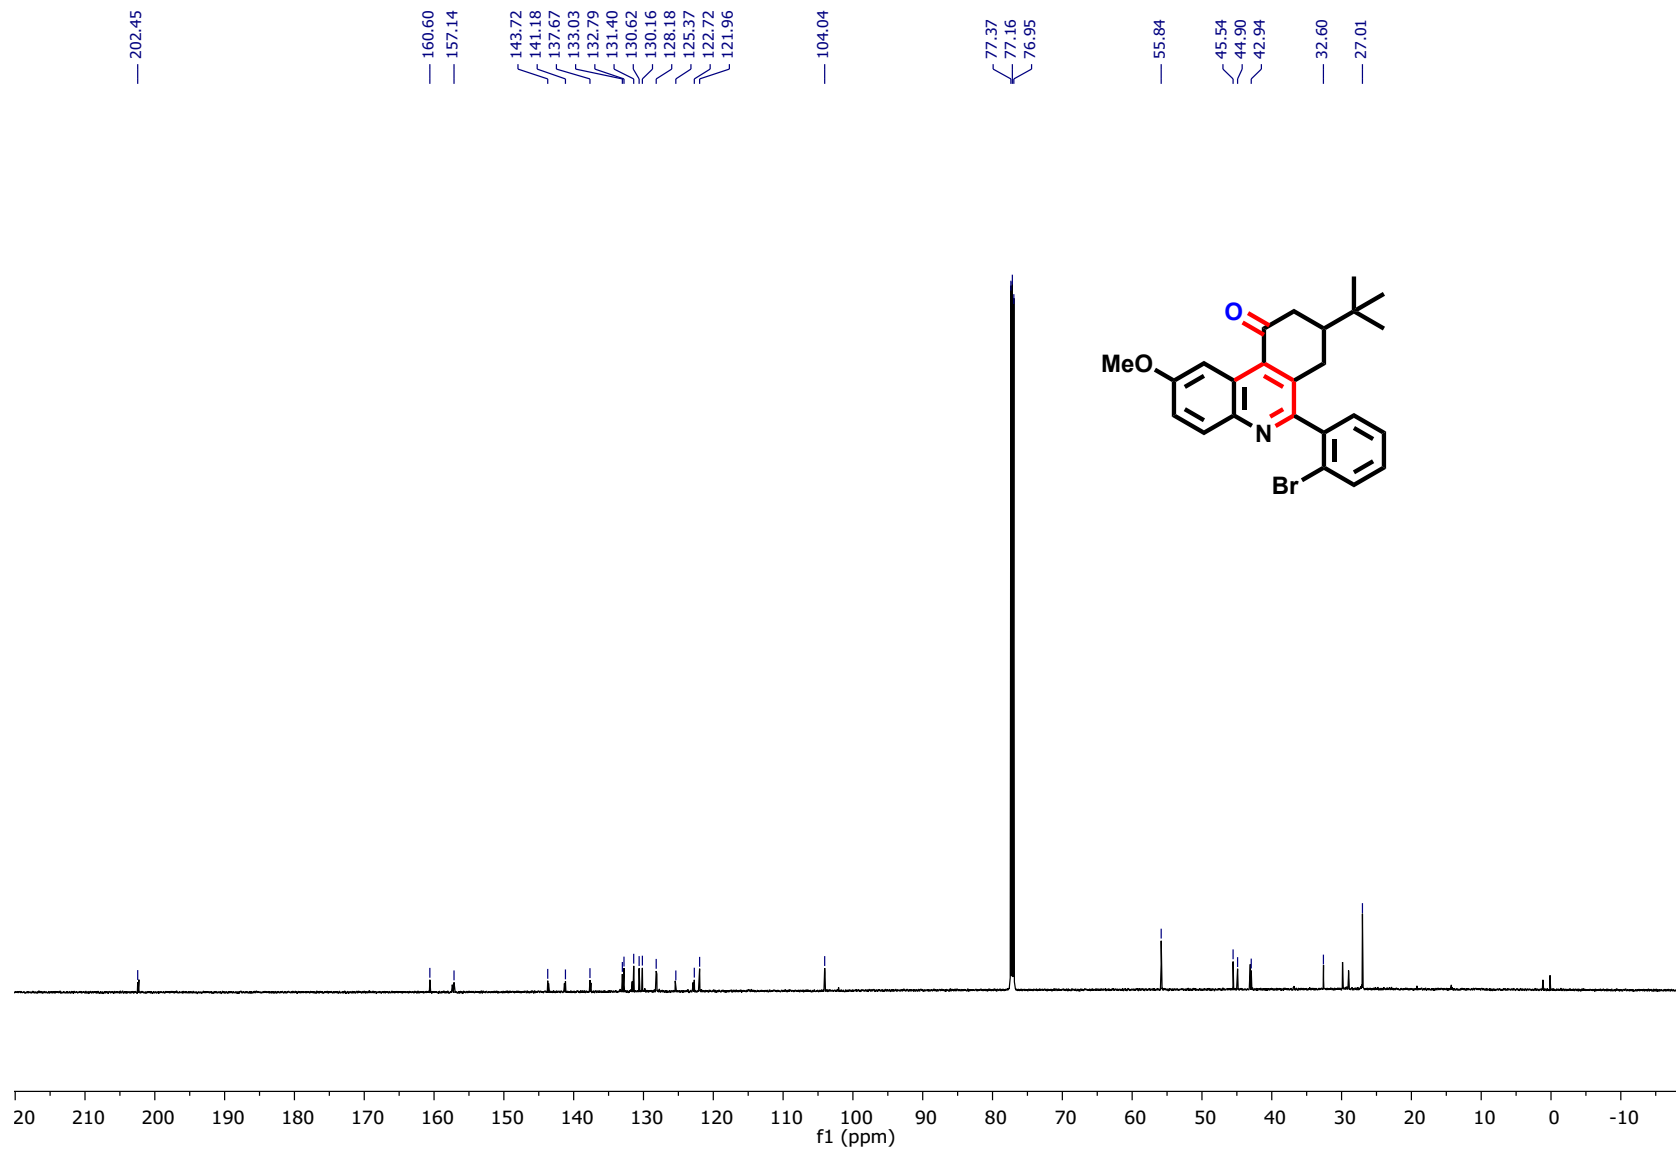

# HRMS Spectrum of Compound 6d

## Display Report

### Analysis Info

Analysis Name D:\Data\user data\HPLC\DR LOKMAN\PRABHAS\SY-P48-TBU\_RC1\_01\_1495.d  
Method low mass bruker.m  
Sample Name SY-P48-TBU  
Comment

Acquisition Date 1/27/2022 1:33:50 PM

Operator vidhi

Instrument impact HD 1819696.00197

### Acquisition Parameter

|             |          |                      |          |                  |           |
|-------------|----------|----------------------|----------|------------------|-----------|
| Source Type | ESI      | Ion Polarity         | Positive | Set Nebulizer    | 1.8 Bar   |
| Focus       | Active   | Set Capillary        | 4500 V   | Set Dry Heater   | 200 °C    |
| Scan Begin  | 50 m/z   | Set End Plate Offset | -500 V   | Set Dry Gas      | 6.0 l/min |
| Scan End    | 1500 m/z | Set Charging Voltage | 2000 V   | Set Divert Valve | Waste     |
|             |          | Set Corona           | 0 nA     | Set APCI Heater  | 0 °C      |

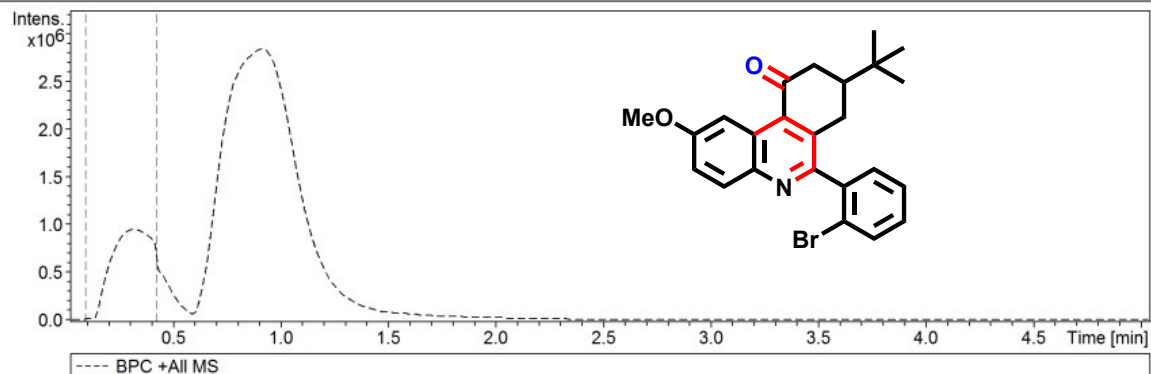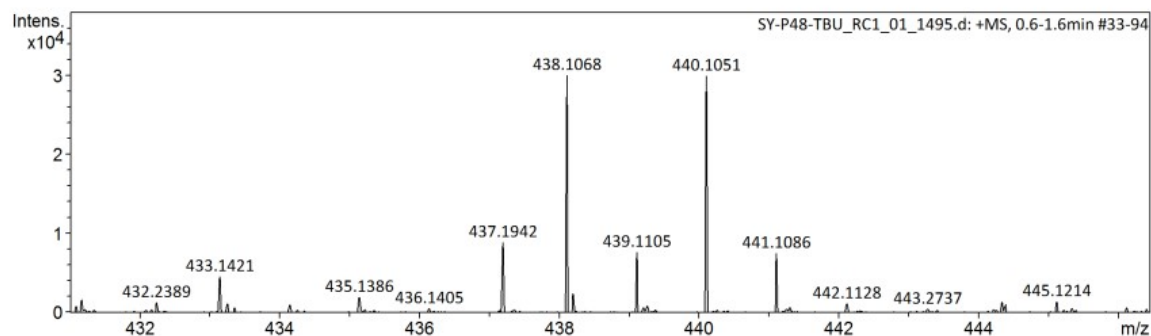

# <sup>1</sup>H NMR Spectrum of Compound 7i

ATK-SY-P7AI-1H.1.fid — ATK-SY-P7AI-1H

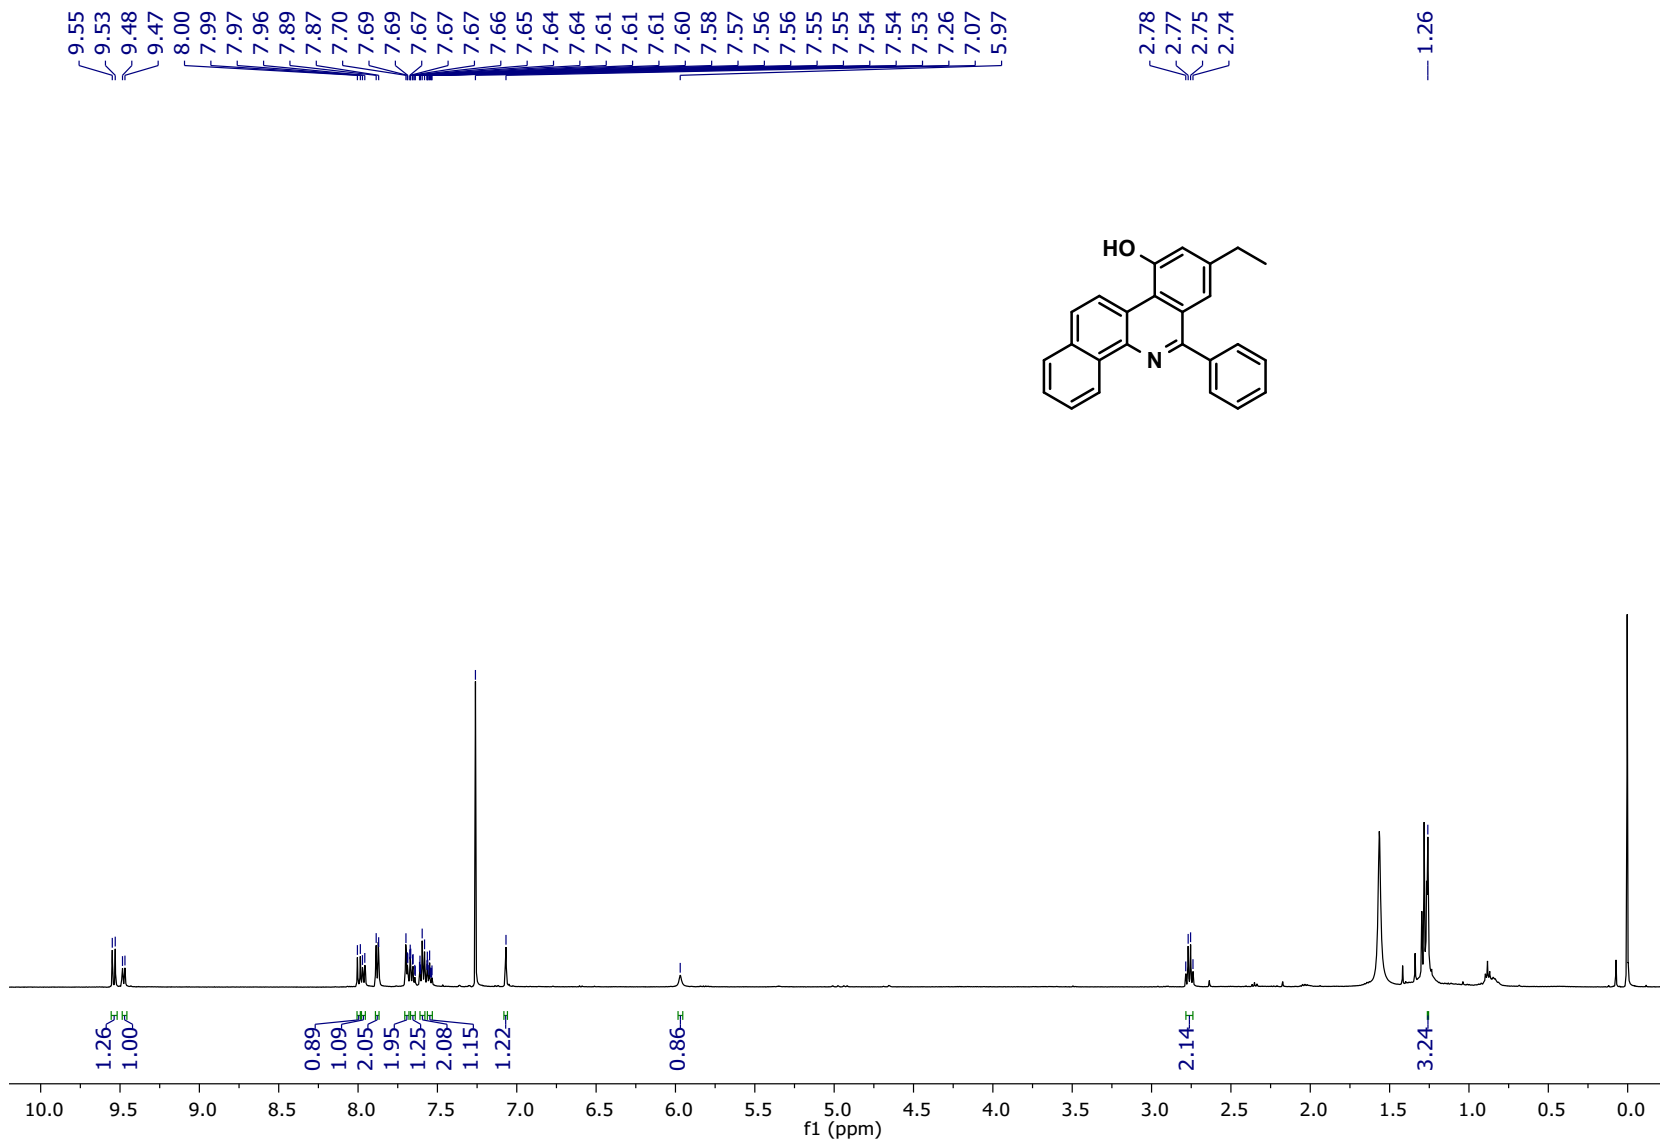

# <sup>13</sup>C NMR Spectrum of Compound 7i

ATK-SY-P7AI-13C.1.fid  
ATK-SY-P7AI-13C

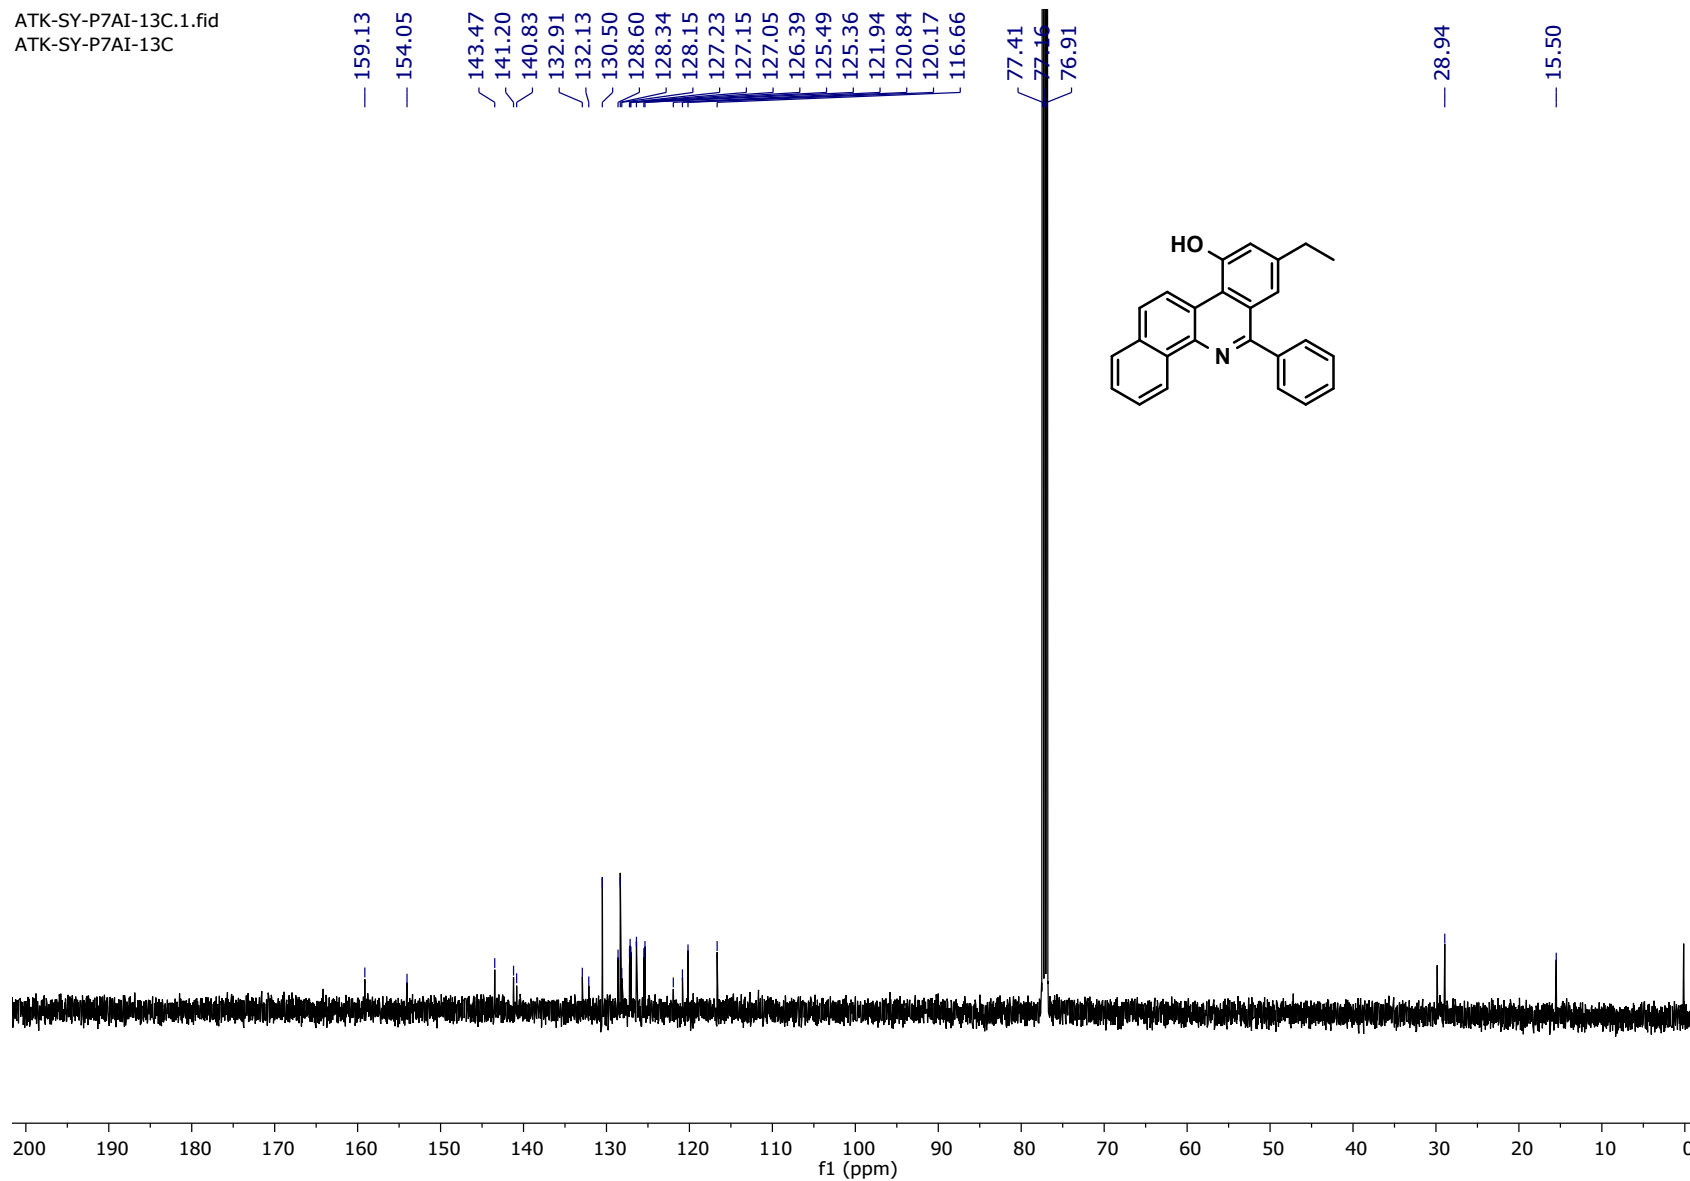

# HRMS Spectrum of Compound 7i

## Display Report

### Analysis Info

Analysis Name D:\Data\user data\HPLC\DR LOKMAN\30.10.2021\ATK-SY-P7-I\_RB2\_01\_1144.d  
Method low mass bruker.m  
Sample Name ATK-SY-P7-I  
Comment

Acquisition Date 11/2/2021 8:26:03 AM

Operator vidhi  
Instrument impact HD 1819696.00197

### Acquisition Parameter

|             |          |                      |          |                  |           |
|-------------|----------|----------------------|----------|------------------|-----------|
| Source Type | ESI      | Ion Polarity         | Positive | Set Nebulizer    | 1.8 Bar   |
| Focus       | Active   | Set Capillary        | 4500 V   | Set Dry Heater   | 200 °C    |
| Scan Begin  | 50 m/z   | Set End Plate Offset | -500 V   | Set Dry Gas      | 6.0 l/min |
| Scan End    | 1500 m/z | Set Charging Voltage | 2000 V   | Set Divert Valve | Waste     |
|             |          | Set Corona           | 0 nA     | Set APCI Heater  | 0 °C      |

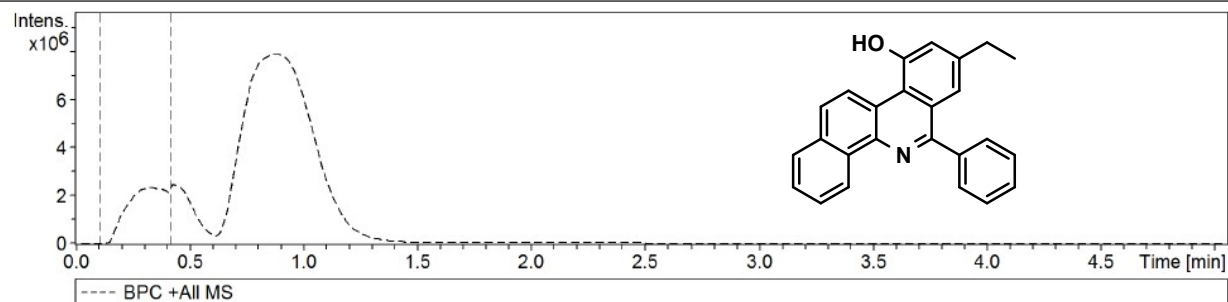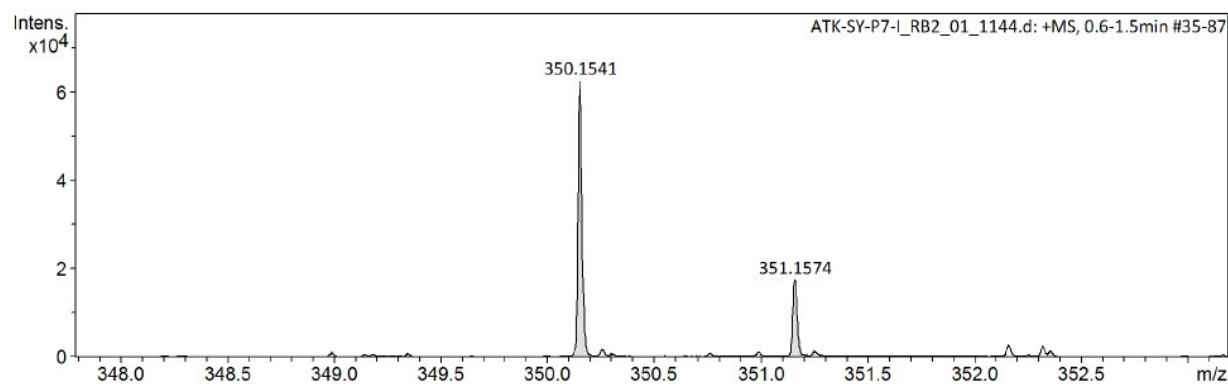

# <sup>1</sup>H NMR Spectrum of Compound 7j

ATK-SY-P23D-1H.2.fid — ATK-SY-P23D-1H

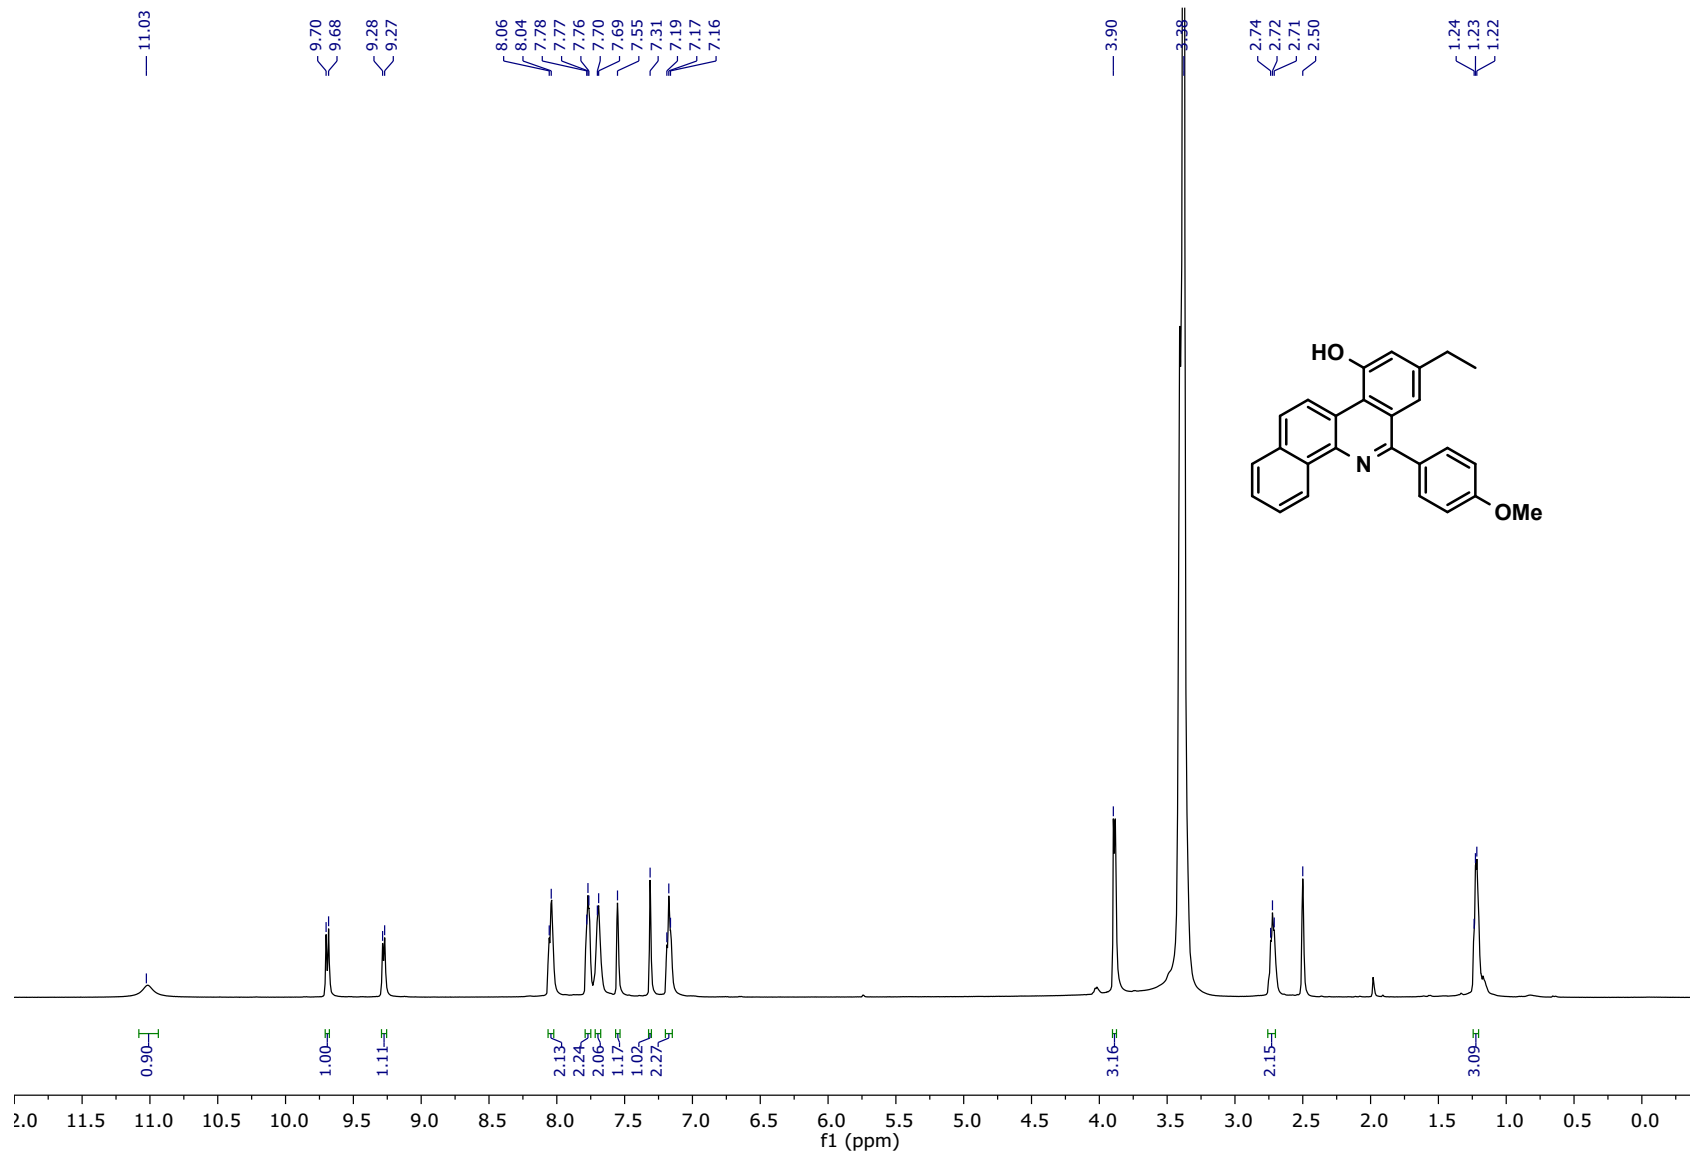

# <sup>13</sup>C NMR Spectrum of Compound 7j

ATK-SY-P23D-13C.4.fid  
ATK-SY-P23D-13C

159.65  
158.50  
156.11  
143.64  
139.87  
132.17  
131.34  
131.17  
127.25  
127.01  
126.30  
125.22  
124.44  
120.99  
120.58  
117.44  
116.27  
113.75

55.31

40.02  
39.85  
39.69  
39.53  
39.35  
39.19  
39.02

28.30

15.28

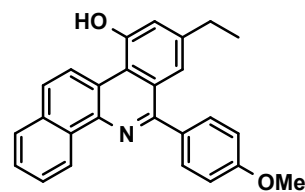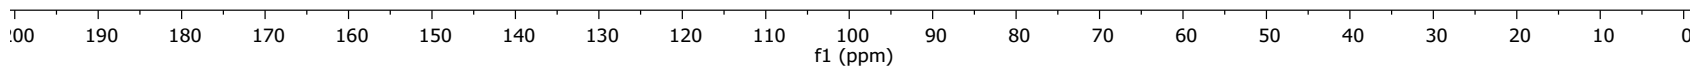

## HRMS Spectrum of Compound 7j

### Analysis Info

Analysis Name D:\Data\user data\HPLC\DR LOKMAN\30.10.2021\ATK-SY-P23-DA\_RB3\_01\_1145.d  
Method low mass bruker.m  
Sample Name ATK-SY-P23-DA  
Comment

Acquisition Date 11/2/2021 8:32:41 AM

Operator vidhi

Instrument impact HD 1819696.00197

### Acquisition Parameter

|             |          |                      |          |                  |           |
|-------------|----------|----------------------|----------|------------------|-----------|
| Source Type | ESI      | Ion Polarity         | Positive | Set Nebulizer    | 1.8 Bar   |
| Focus       | Active   | Set Capillary        | 4500 V   | Set Dry Heater   | 200 °C    |
| Scan Begin  | 50 m/z   | Set End Plate Offset | -500 V   | Set Dry Gas      | 6.0 l/min |
| Scan End    | 1500 m/z | Set Charging Voltage | 2000 V   | Set Divert Valve | Waste     |
|             |          | Set Corona           | 0 nA     | Set APCI Heater  | 0 °C      |

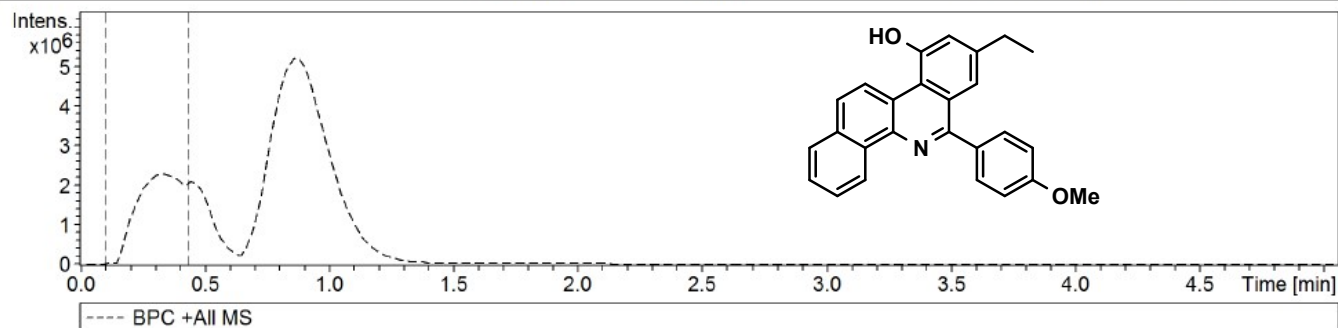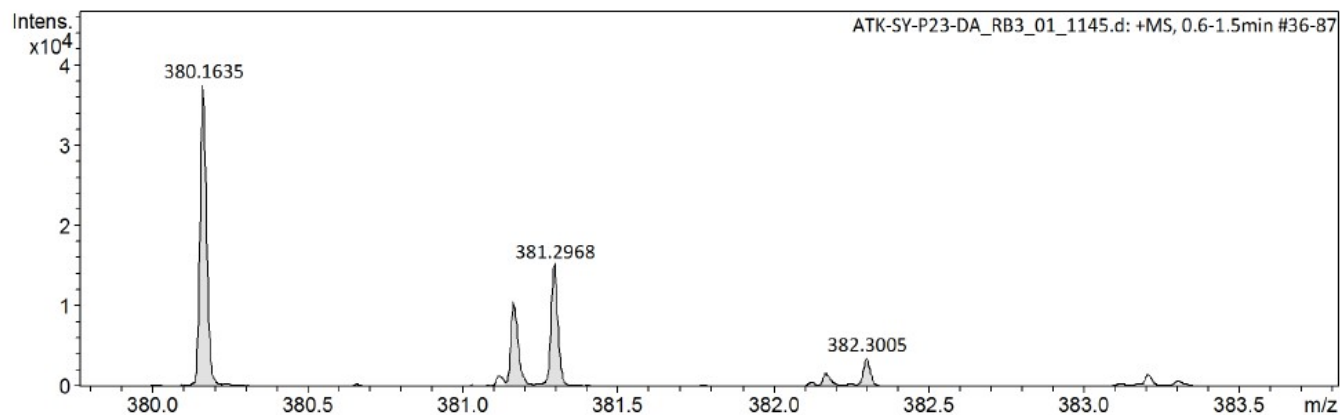



# <sup>1</sup>H NMR Spectrum of Compound 7q

ATK-SY-PGH-D-1H.1.fid — ATK-SY-PGH-D-1H

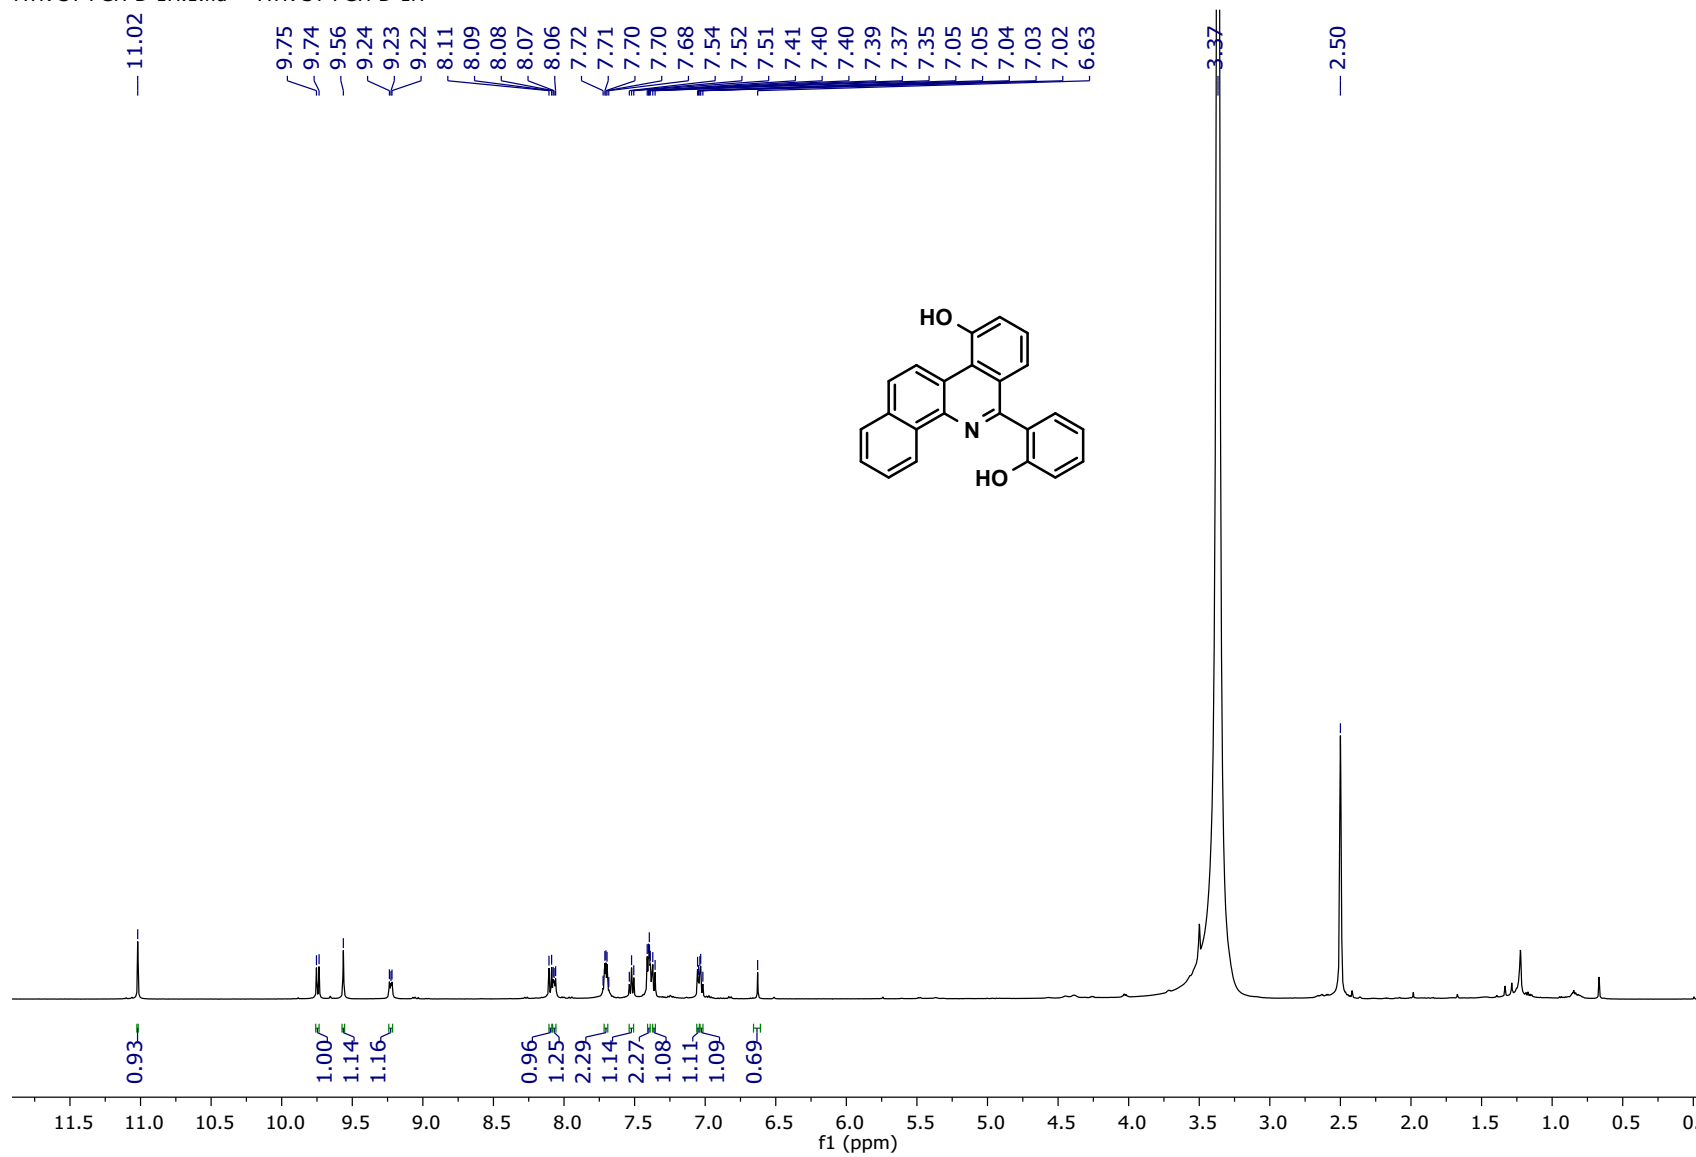

# <sup>13</sup>C NMR Spectrum of Compound 7q

ATK-SY-PG11-D-13C.1.fid  
13C

158.63  
155.89  
155.10

139.85  
132.23  
131.11  
130.90  
129.77  
128.08  
127.85  
127.71  
127.29  
127.14  
126.45  
126.34  
125.39  
124.56  
121.92  
121.00  
119.63  
119.11  
115.90  
115.74

39.94  
39.80  
39.66  
39.52  
39.38  
39.24  
39.10

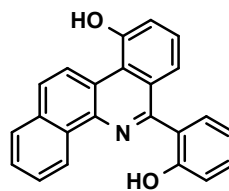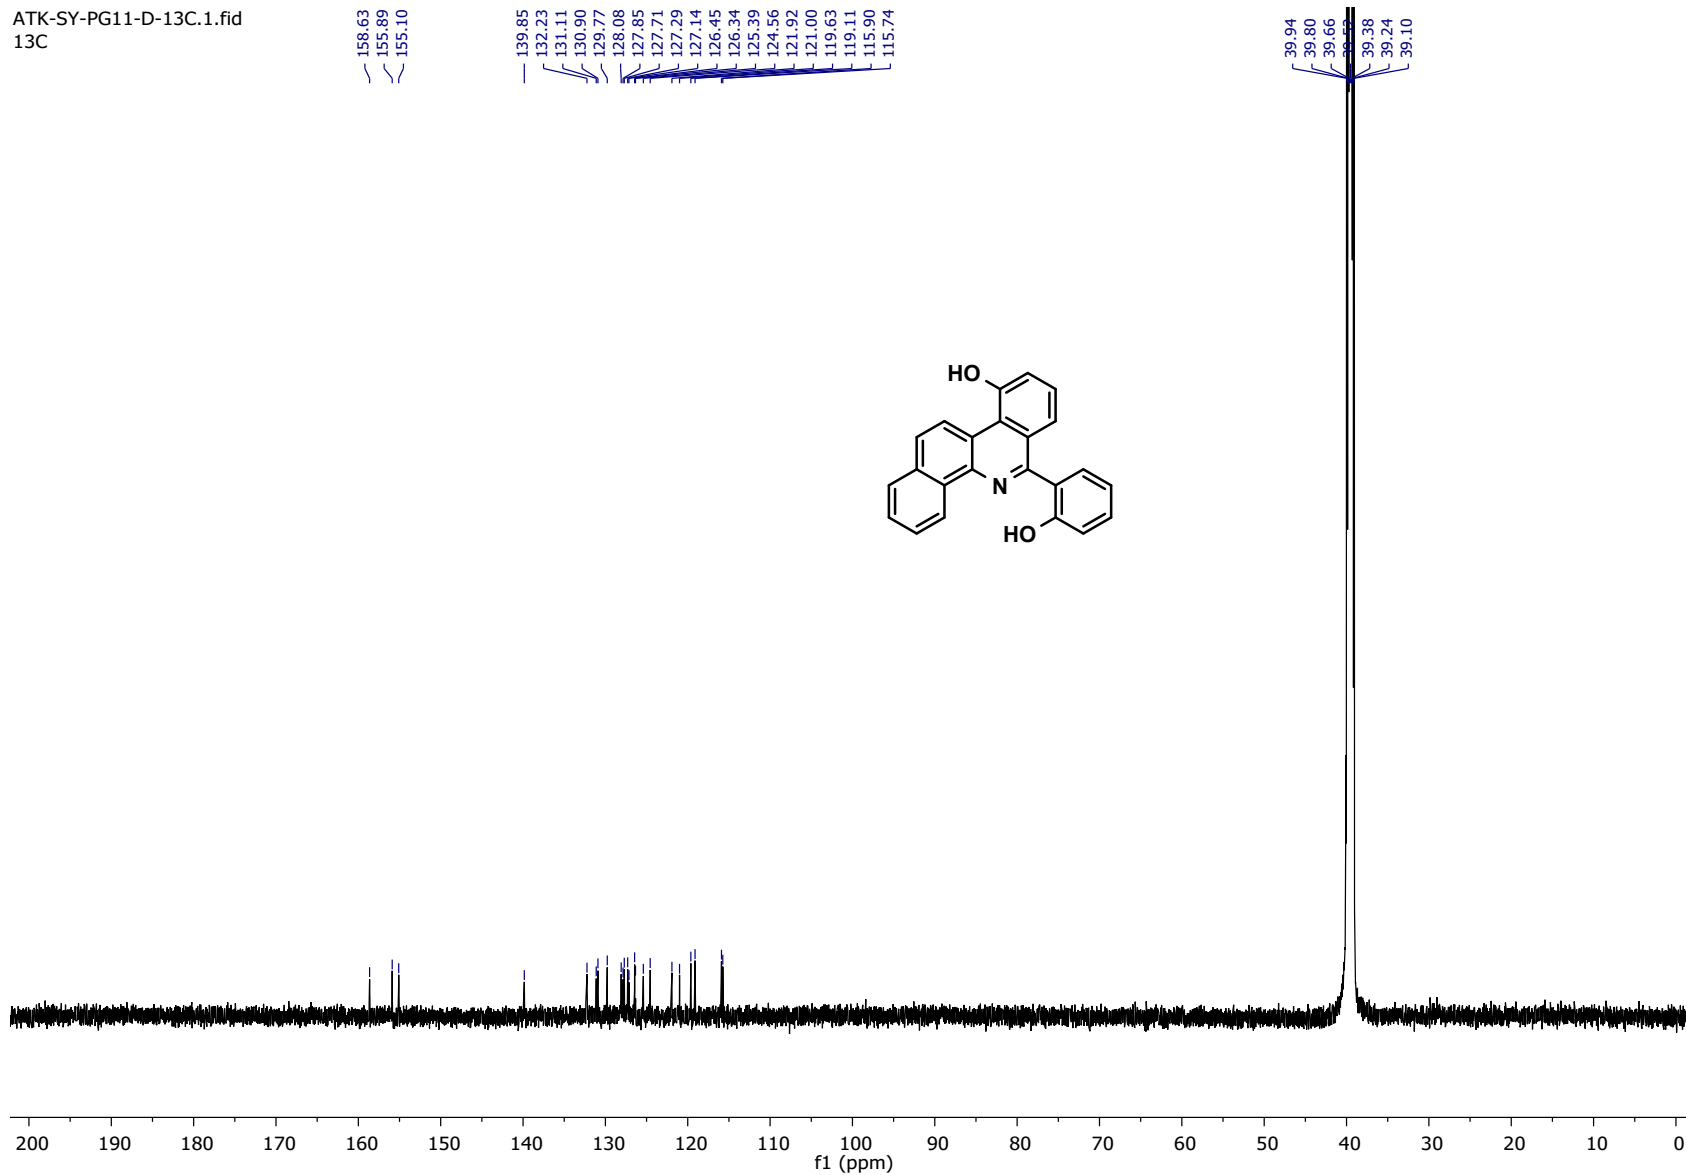

# HRMS Spectrum of Compound 7q

## Display Report

### Analysis Info

Analysis Name D:\Data\user data\HPLC\DR LOKMAN\30.10.2021\ATK-SY-PG-11-D\_RA7\_01\_1142.d

Method low mass bruker.m

Sample Name ATK-SY-PG-11-D

Comment

Acquisition Date 11/2/2021 8:13:03 AM

Operator vidhi

Instrument impact HD

1819696.00197

### Acquisition Parameter

Source Type

ESI

Ion Polarity

Positive

Set Nebulizer

1.8 Bar

Focus

Active

Set Capillary

4500 V

Set Dry Heater

200 °C

Scan Begin

50 m/z

Set End Plate Offset

-500 V

Set Dry Gas

6.0 l/min

Scan End

1500 m/z

Set Charging Voltage

2000 V

Set Divert Valve

Waste

Set Corona

0 nA

Set APCI Heater

0 °C

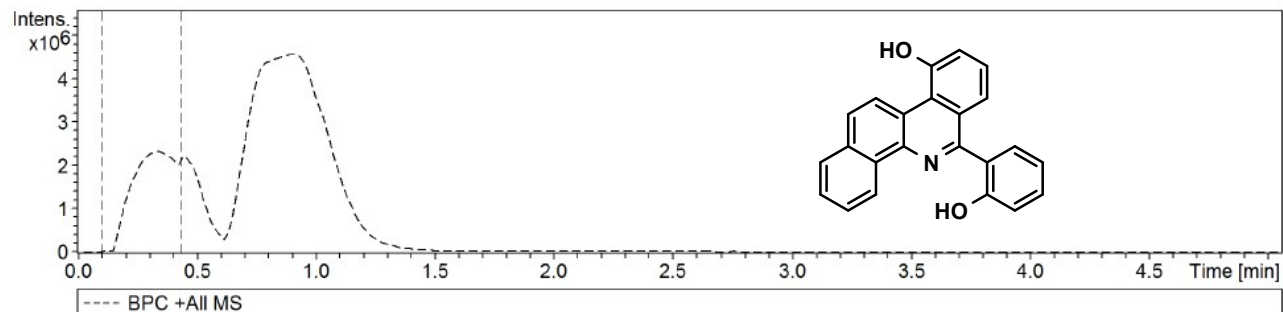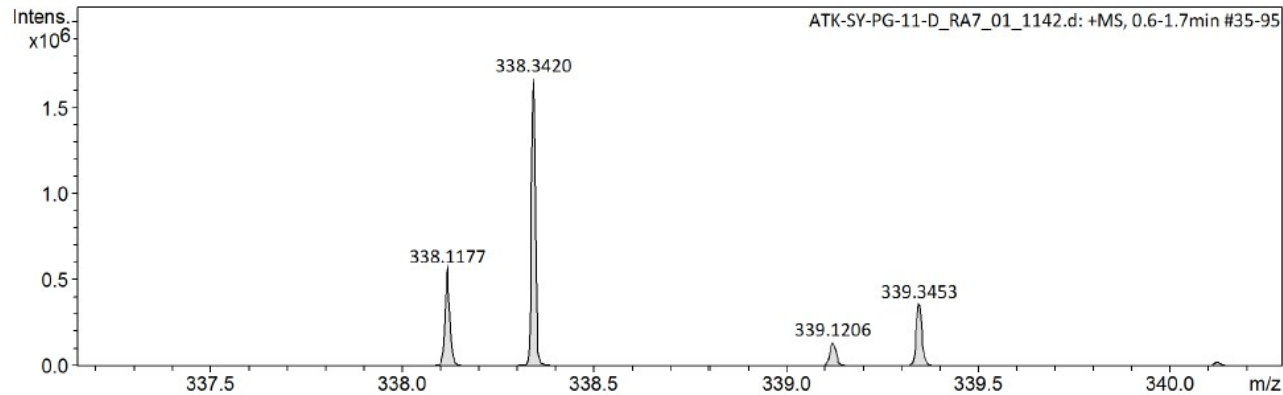

# <sup>1</sup>H NMR Spectrum of Compound 7t

ATK-SY-PGRO-D-1H.1.fid — ATK-SY-PGRO-D-1H

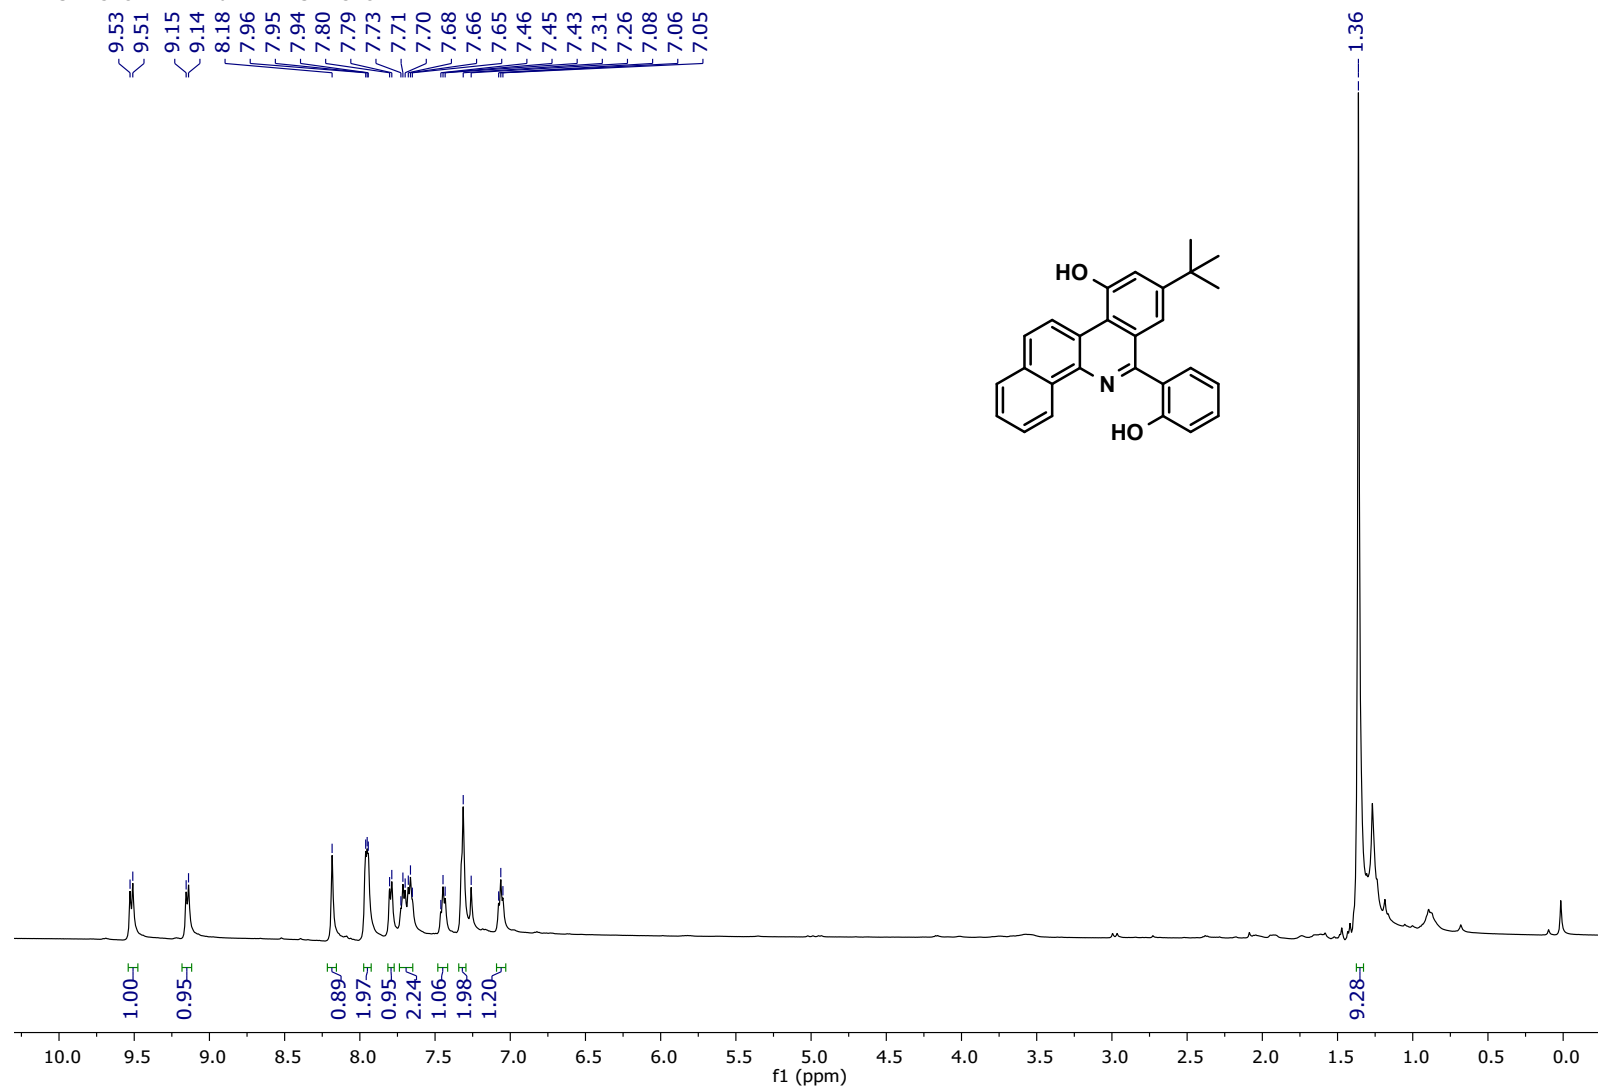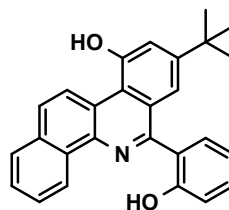

ATK-SY-PGRO-D-13C.3.fid  
ATK-SY-PGRO-D-13C

### <sup>13</sup>C NMR Spectrum of Compound 7t

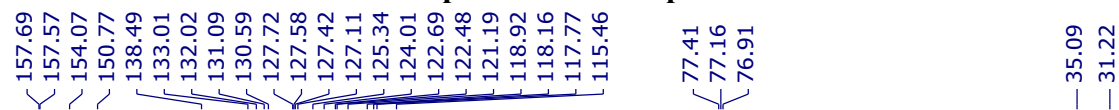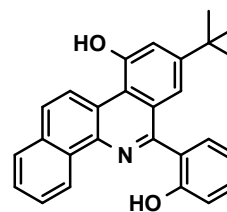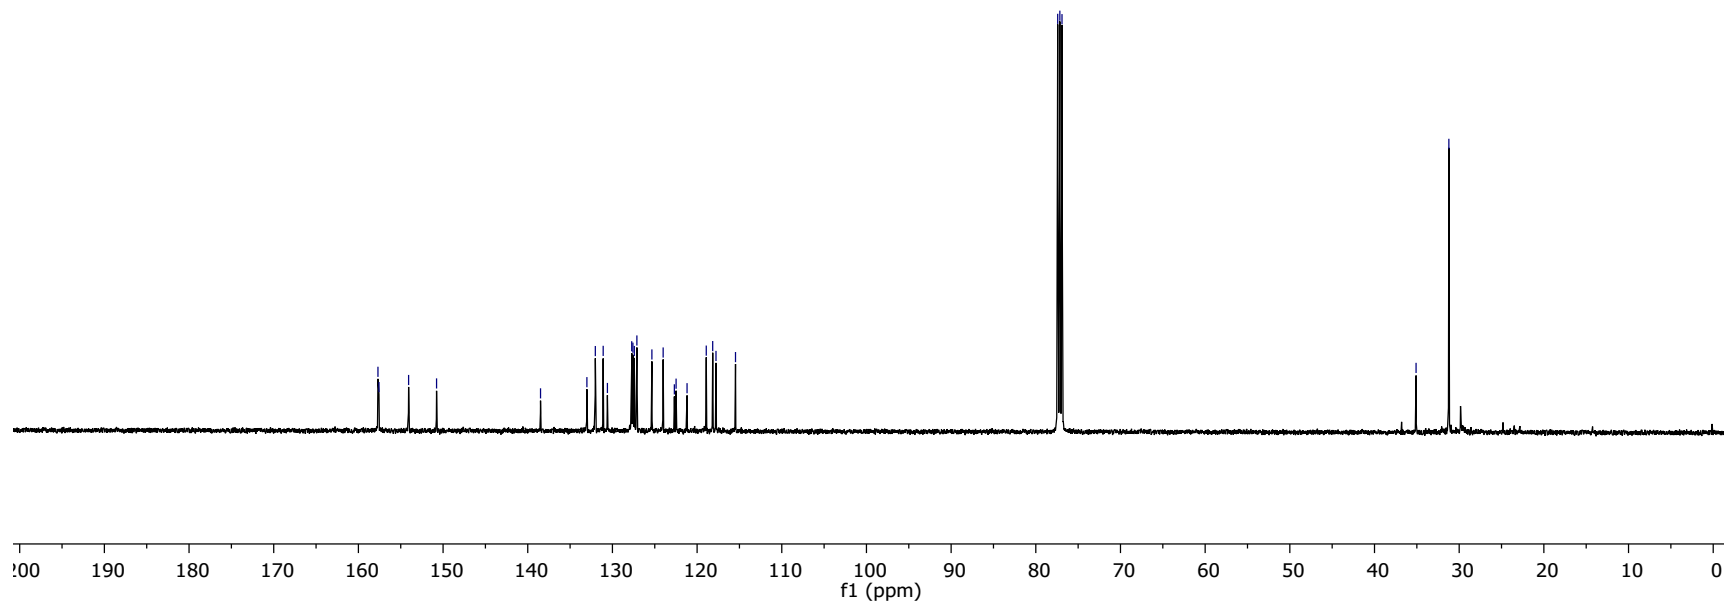

# HRMS Spectrum of Compound 7t

## Display Report

### Analysis Info

Analysis Name

D:\Data\user data\HPLC\DR LOKMAN\30.10.2021\ATK-SY-PGRO-D\_RA2\_01\_1137.d

Acquisition Date 11/2/2021 7:40:26 AM

Method

low mass bruker.m

Operator vidhi

Sample Name

ATK-SY-PGRO-D

Instrument impact HD

1819696.00197

Comment

### Acquisition Parameter

Source Type

ESI

Ion Polarity Positive

Set Nebulizer

1.8 Bar

Focus

Active

Set Capillary 4500 V

Set Dry Heater

200 °C

Scan Begin

50 m/z

Set End Plate Offset -500 V

Set Dry Gas

6.0 l/min

Scan End

1500 m/z

Set Charging Voltage 2000 V

Set Divert Valve

Waste

Set Corona

0 nA

Set APCI Heater

0 °C

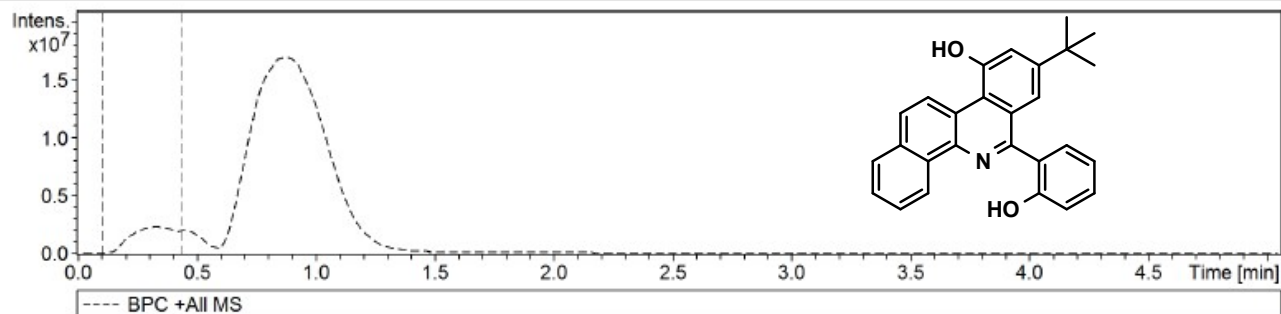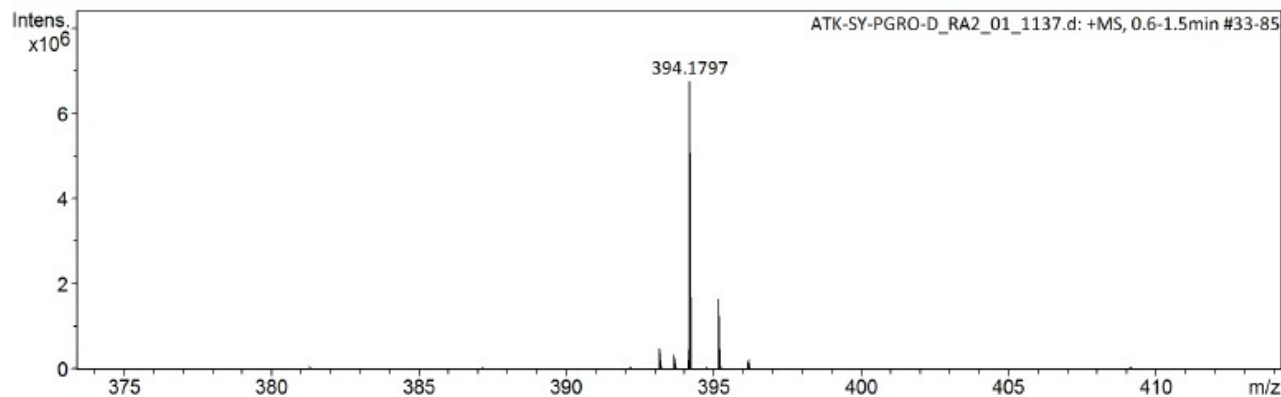

# <sup>1</sup>H NMR Spectrum of Compound 7v

ATK-SY-P35-DA-1H.1.fid — ATK-SY-P35-DA-1H

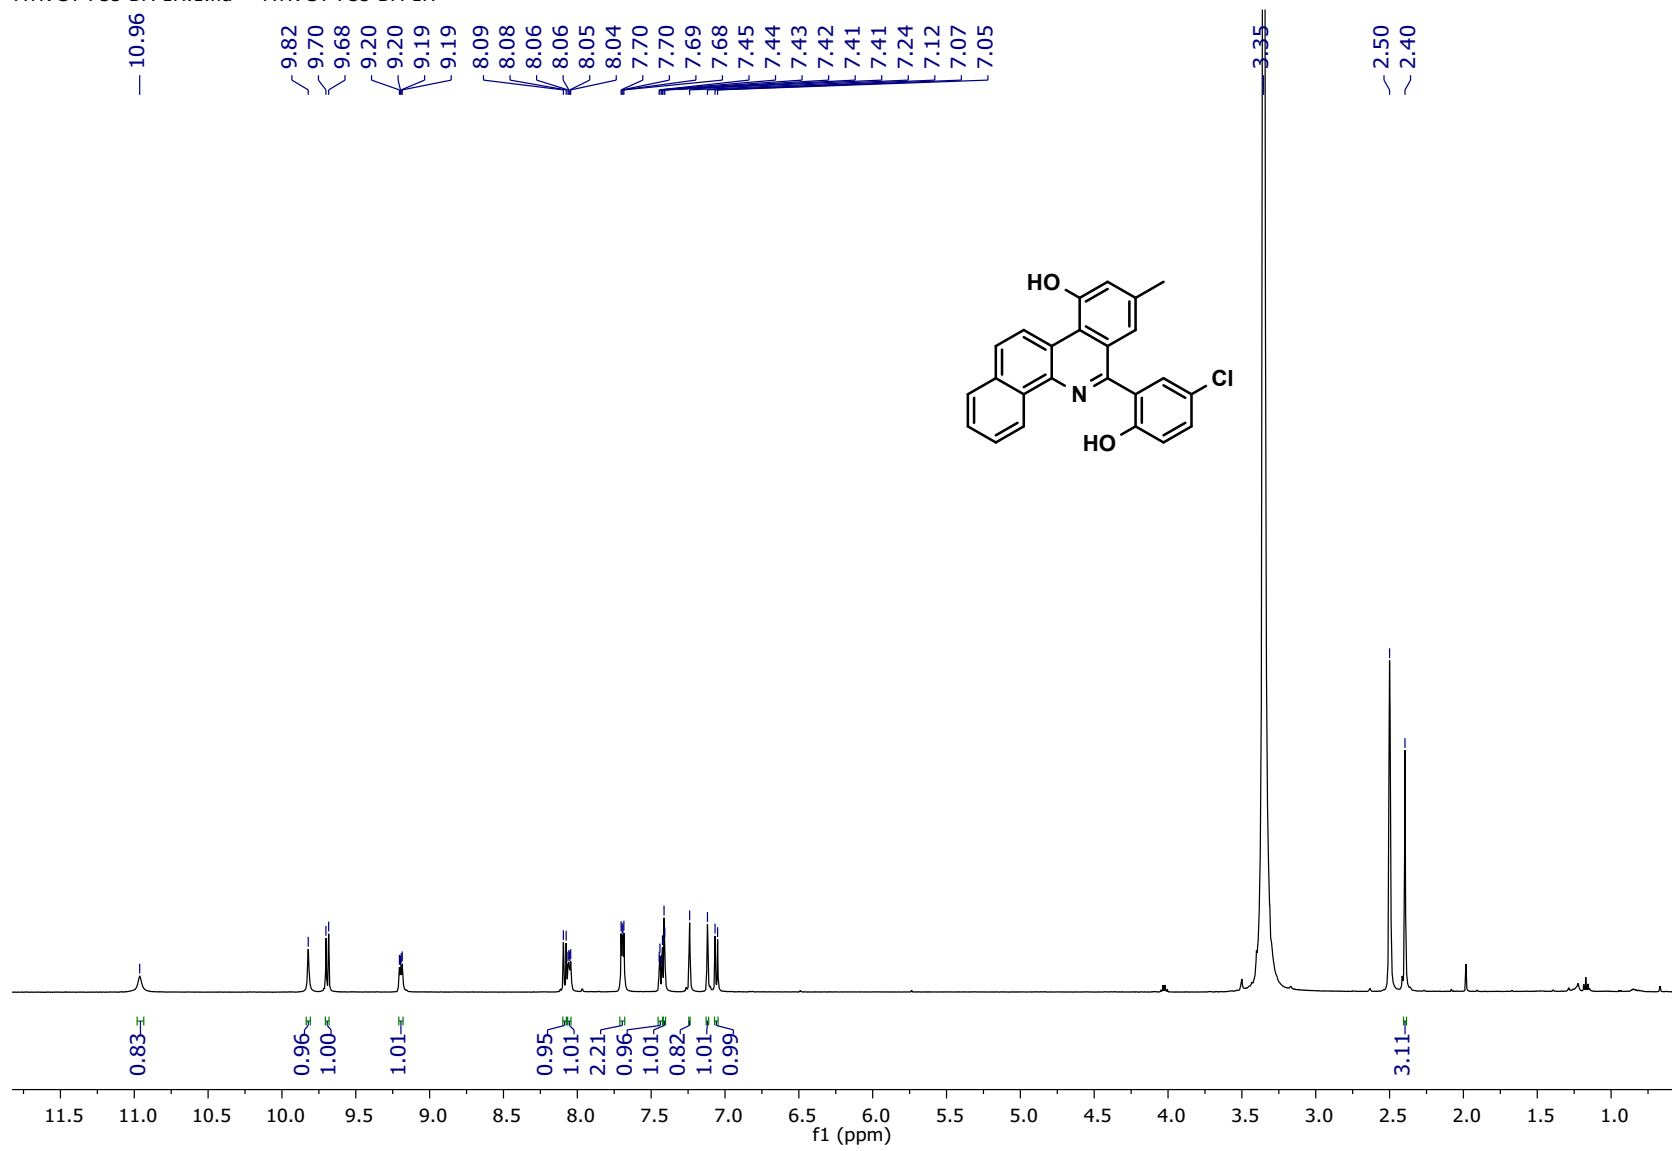

# <sup>13</sup>C NMR Spectrum of Compound 7v

ATK-SY-P35-DA-13C.3.fid  
ATK-SY-P35-DA-13C

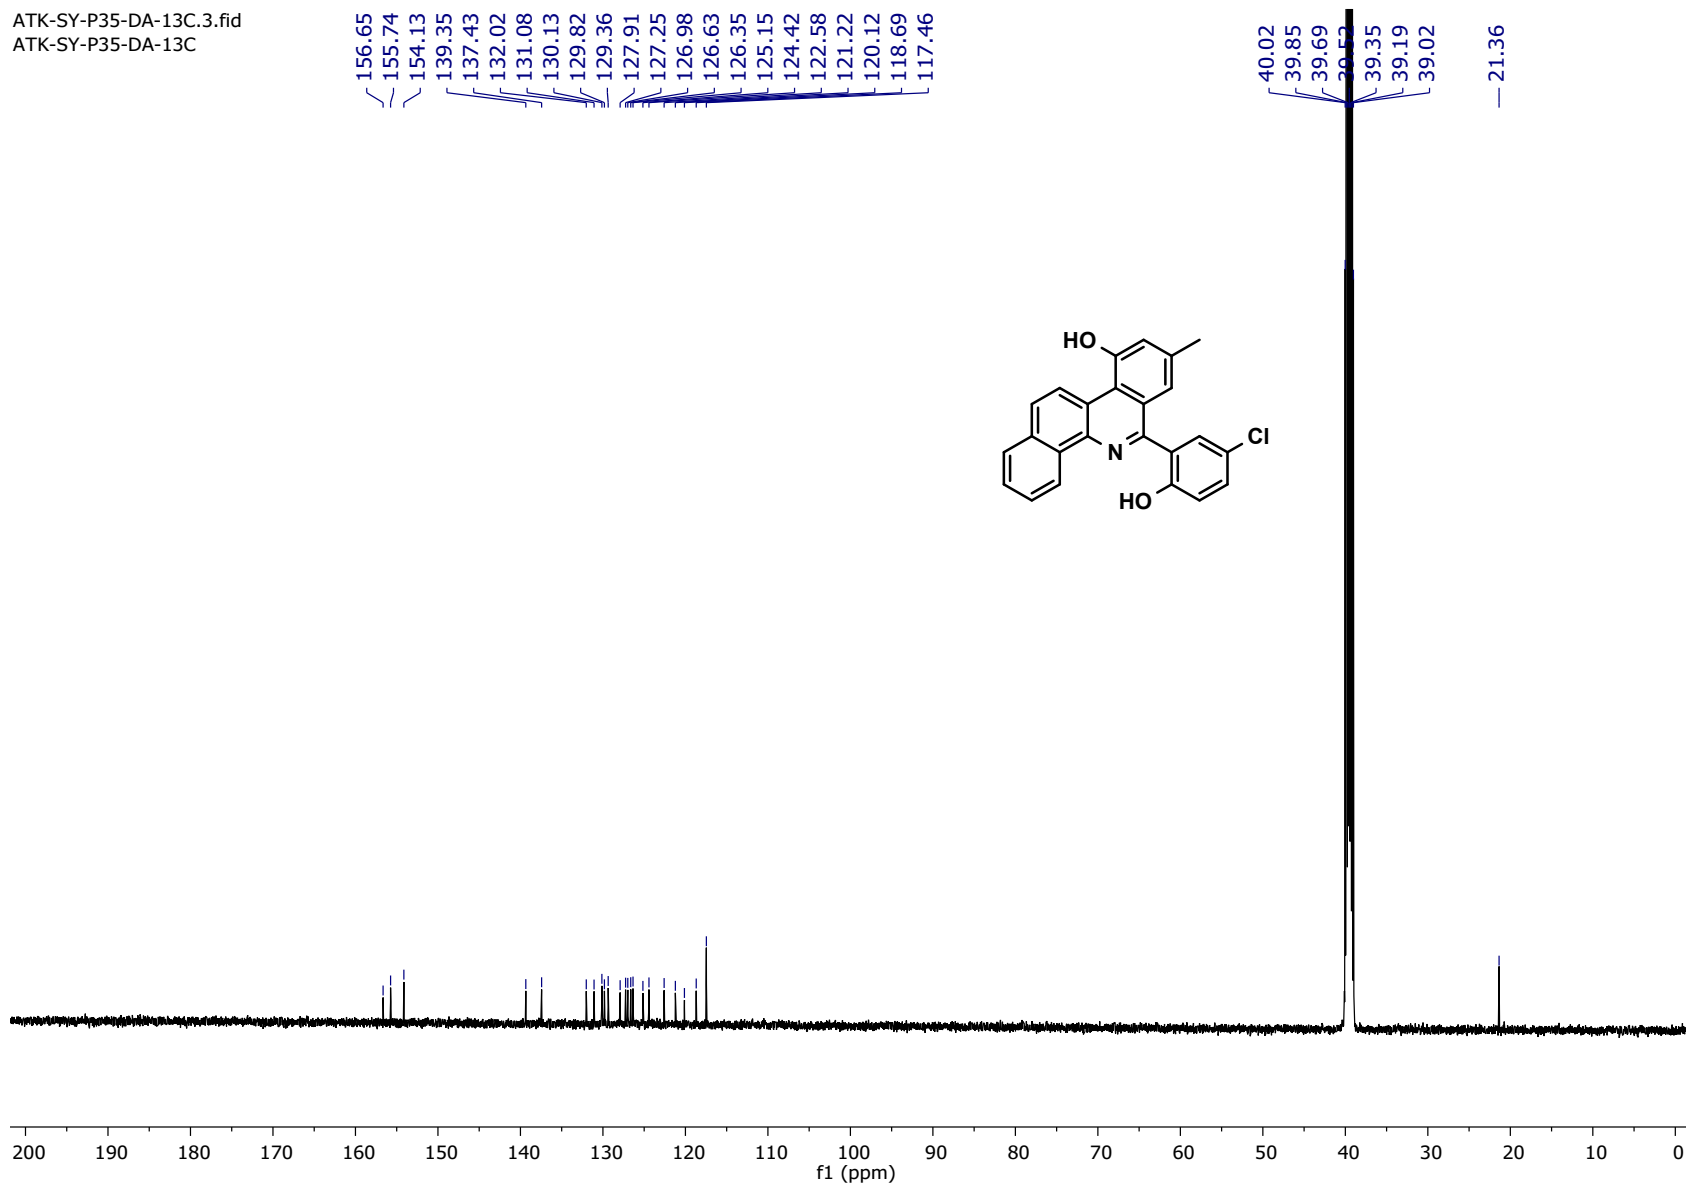



# HRMS Spectrum of Compound 7v

## Display Report

### Analysis Info

Analysis Name D:\Data\user data\HPLC\DR LOKMAN\30.10.2021\ATK-SY-P35-DA\_RA6\_01\_1141.d  
Method low mass bruker.m  
Sample Name ATK-SY-P35-DA  
Comment

Acquisition Date 11/2/2021 8:06:33 AM

Operator vidhi  
Instrument impact HD 1819696.00197

### Acquisition Parameter

|             |          |                      |          |                  |           |
|-------------|----------|----------------------|----------|------------------|-----------|
| Source Type | ESI      | Ion Polarity         | Positive | Set Nebulizer    | 1.8 Bar   |
| Focus       | Active   | Set Capillary        | 4500 V   | Set Dry Heater   | 200 °C    |
| Scan Begin  | 50 m/z   | Set End Plate Offset | -500 V   | Set Dry Gas      | 6.0 l/min |
| Scan End    | 1500 m/z | Set Charging Voltage | 2000 V   | Set Divert Valve | Waste     |
|             |          | Set Corona           | 0 nA     | Set APCI Heater  | 0 °C      |

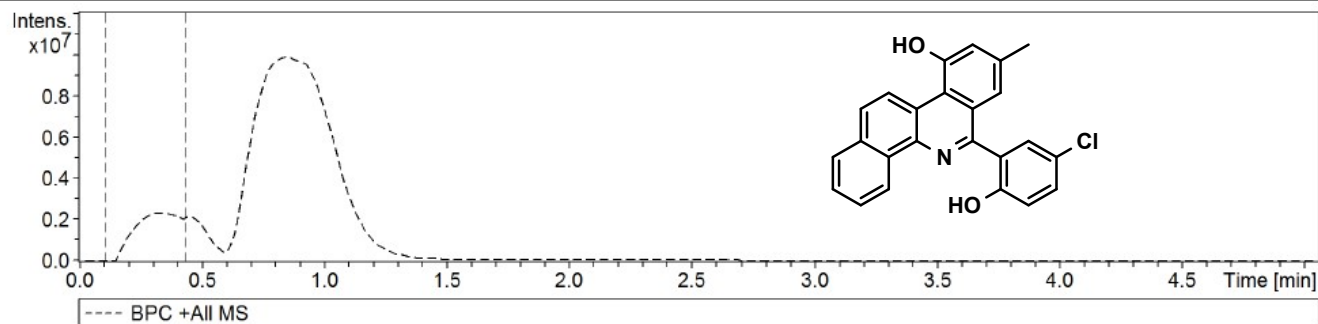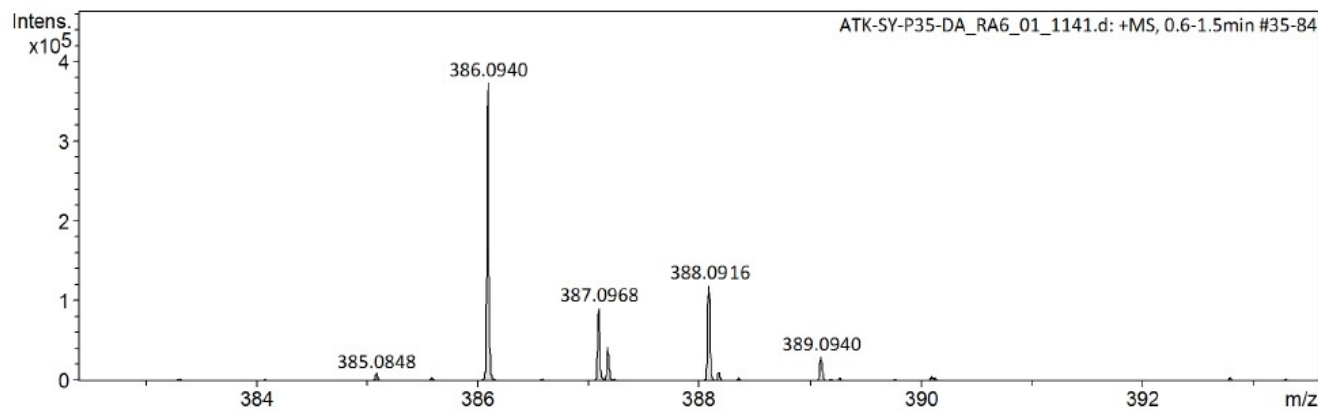

# <sup>1</sup>H NMR Spectrum of Compound 7w

ATK-SY-PG5-D-1H.1.fid — ATK-SY-PG5-D-1H

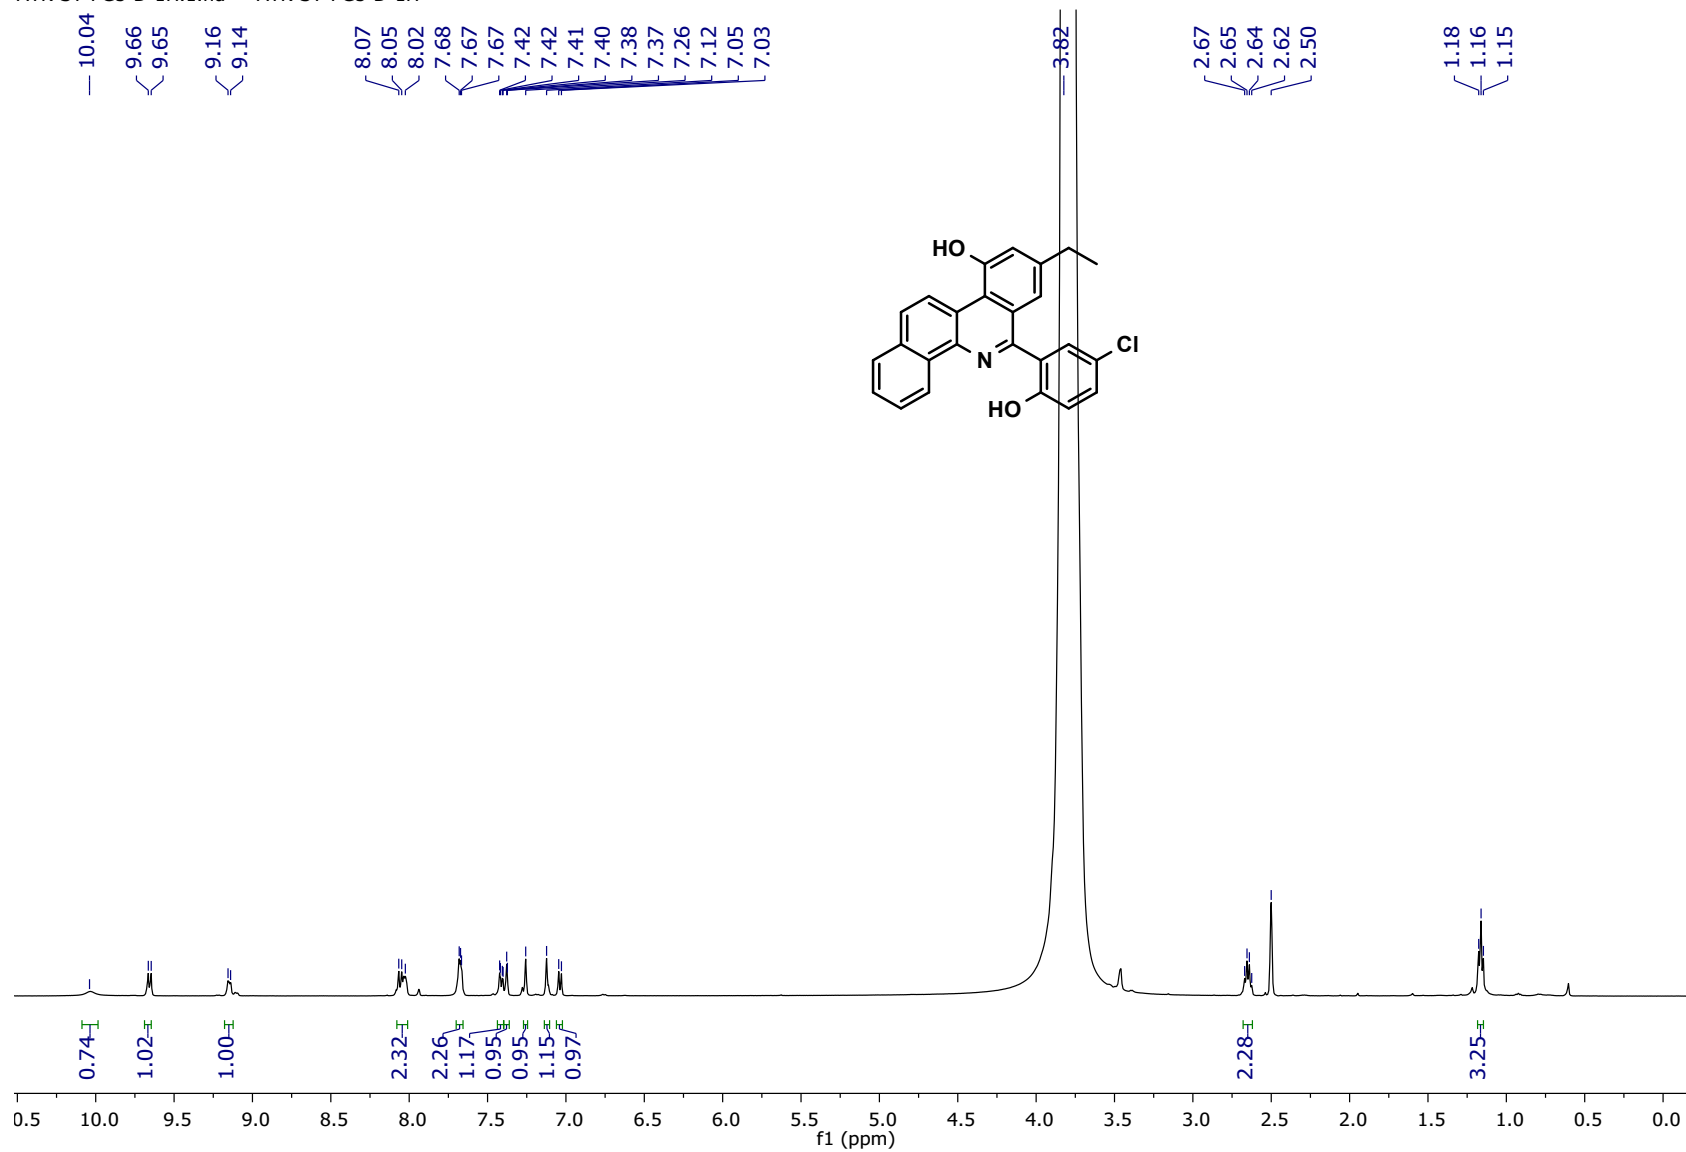

### <sup>13</sup>C NMR Spectrum of Compound 7w

ATK-SY-PG5-D-13C.3.fid  
ATK-SY-PG5-D-13C

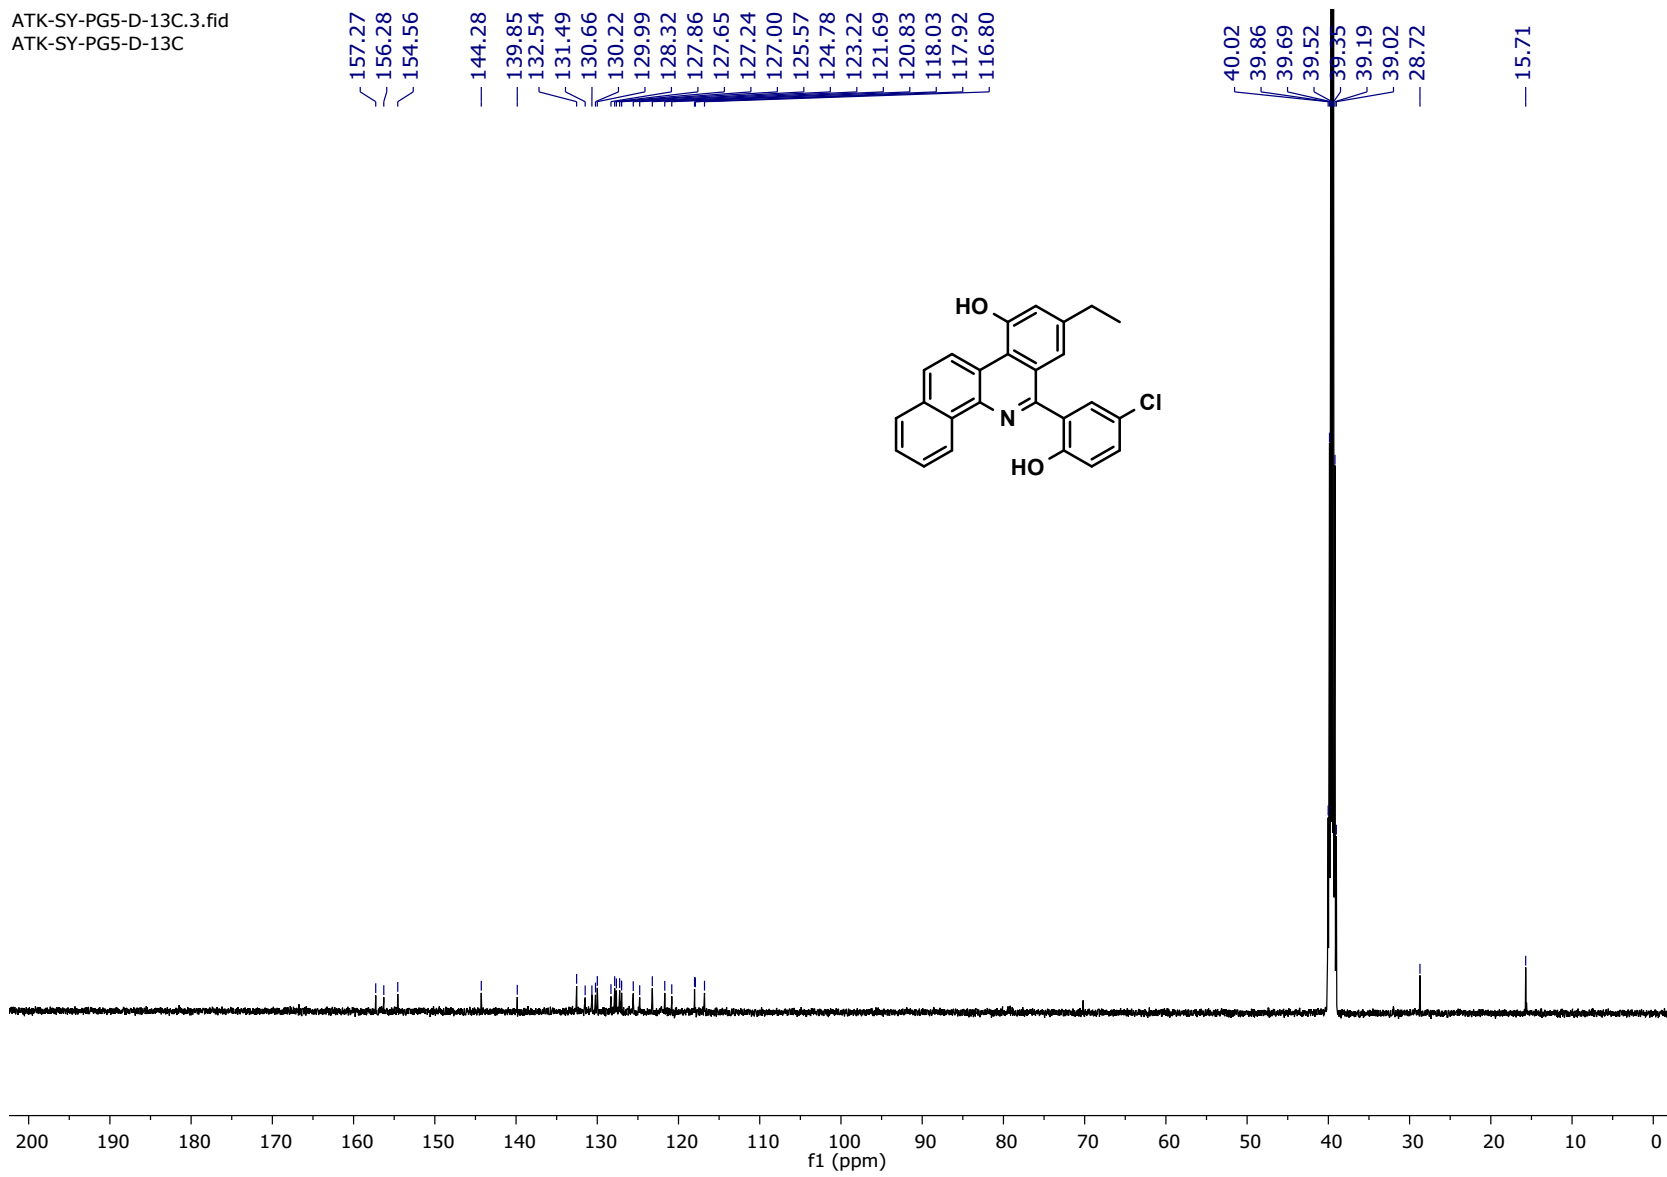

# HRMS Spectrum of Compound 7w

## Display Report

### Analysis Info

Analysis Name D:\Data\user data\HPLC\DR LOKMAN\30.10.2021\ATK-SY-PG5-D\_RA5\_01\_1140.d  
Method low mass bruker.m  
Sample Name ATK-SY-PG5-D  
Comment

Acquisition Date 11/2/2021 8:00:04 AM  
Operator vidhi  
Instrument impact HD 1819696.00197

### Acquisition Parameter

|             |          |                      |          |                  |           |
|-------------|----------|----------------------|----------|------------------|-----------|
| Source Type | ESI      | Ion Polarity         | Positive | Set Nebulizer    | 1.8 Bar   |
| Focus       | Active   | Set Capillary        | 4500 V   | Set Dry Heater   | 200 °C    |
| Scan Begin  | 50 m/z   | Set End Plate Offset | -500 V   | Set Dry Gas      | 6.0 l/min |
| Scan End    | 1500 m/z | Set Charging Voltage | 2000 V   | Set Divert Valve | Waste     |
|             |          | Set Corona           | 0 nA     | Set APCI Heater  | 0 °C      |

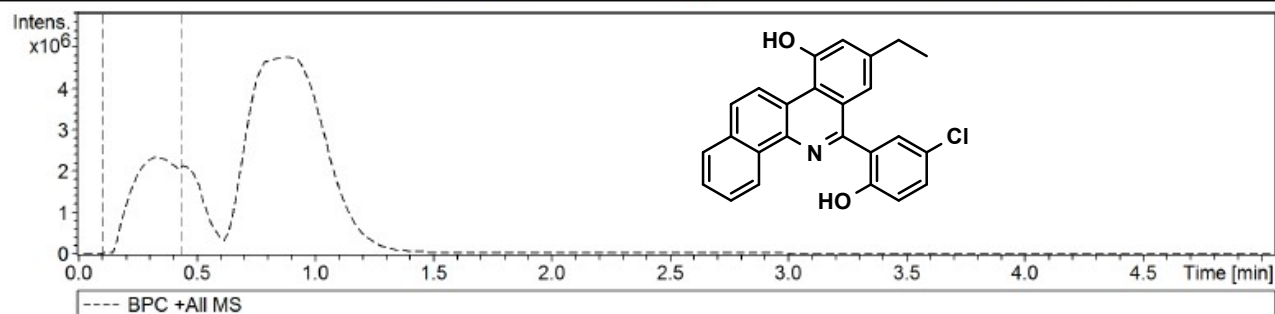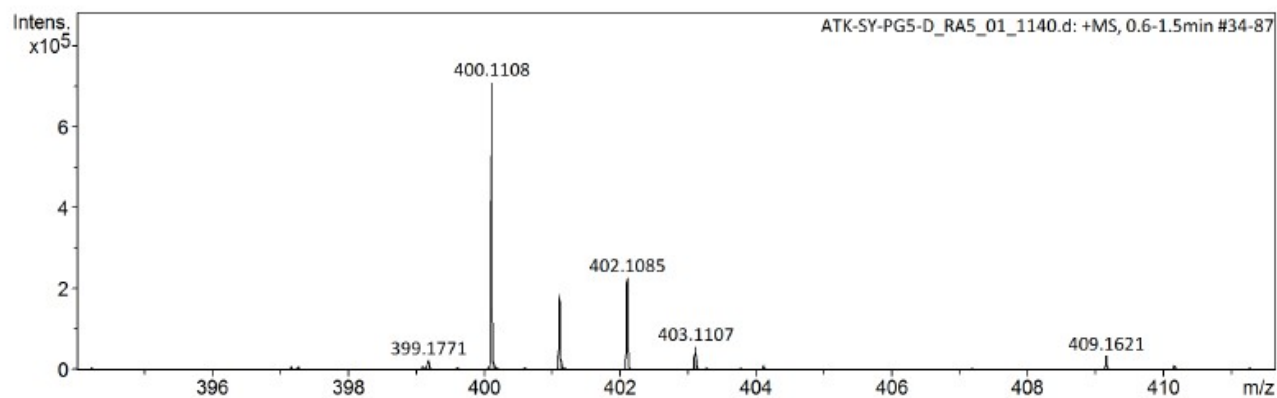

# <sup>1</sup>H NMR Spectrum of Compound 8b

ATK-SY-P24D-1H.3.fid — ATK-SY-P24D-1H

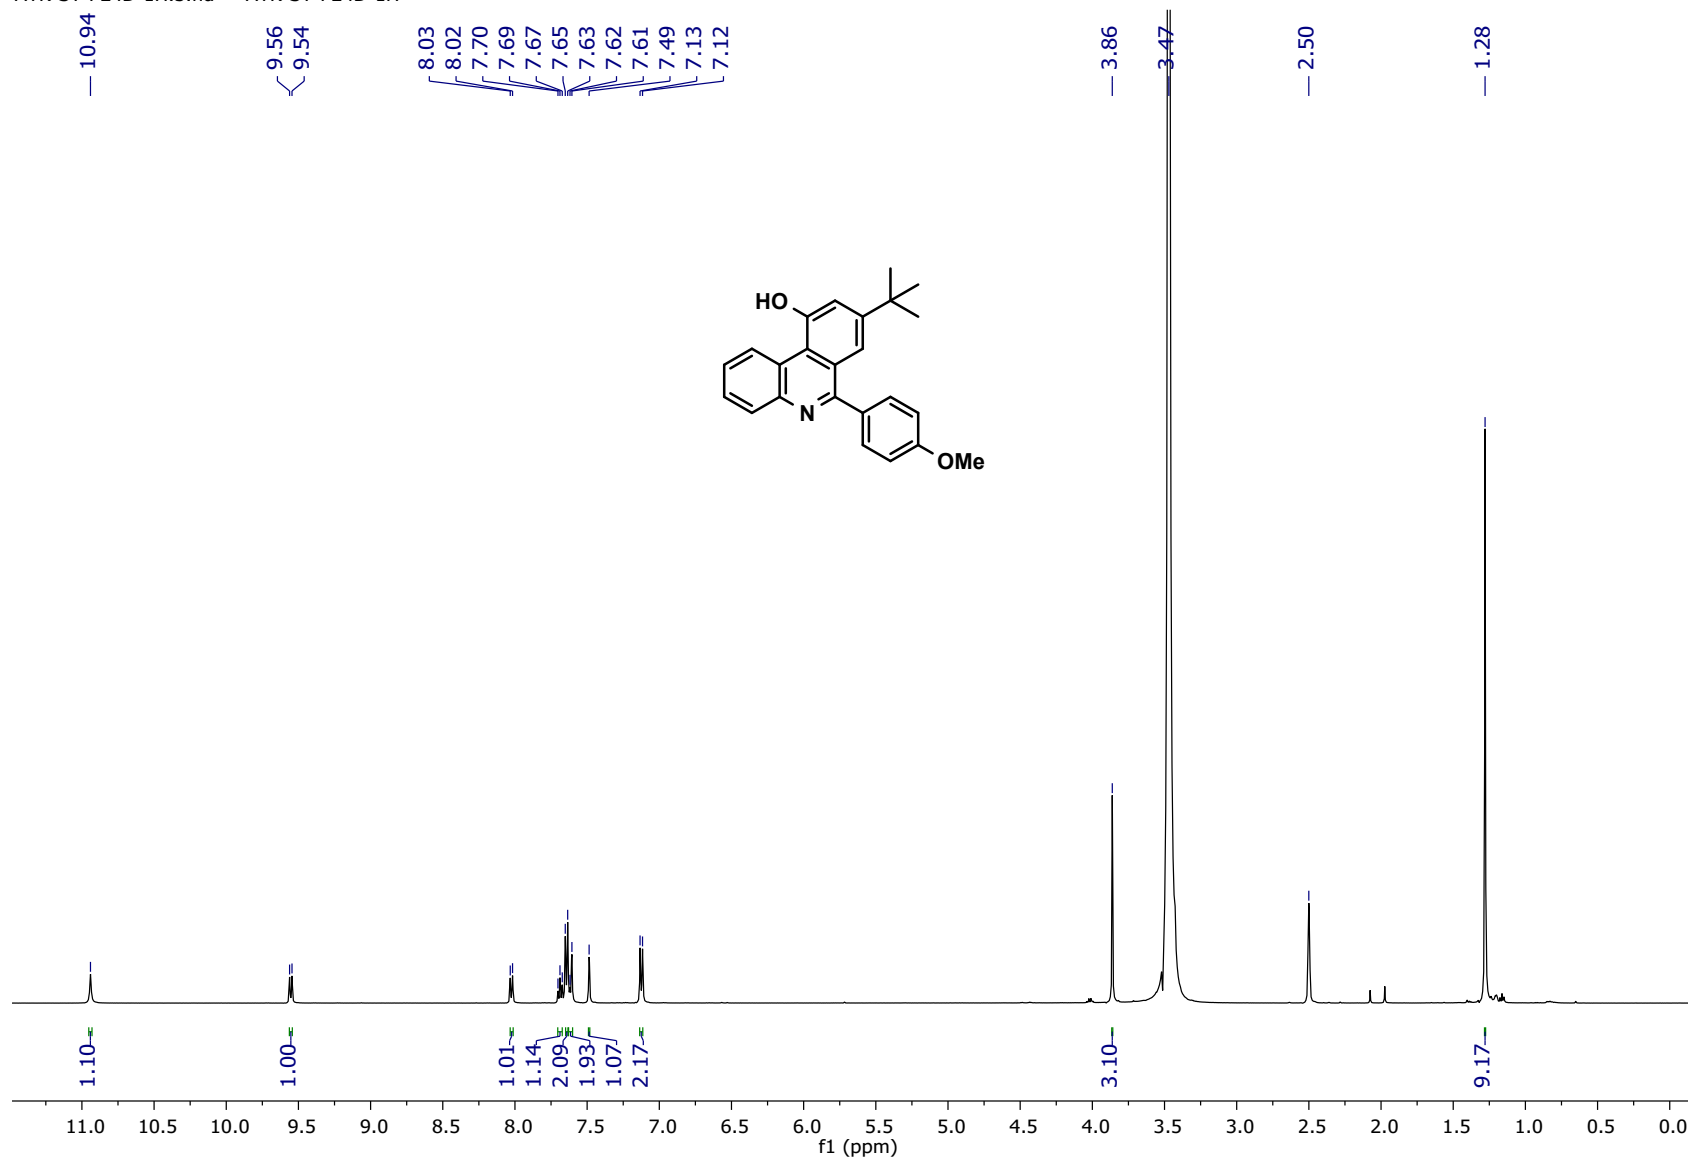

S117

# <sup>13</sup>C NMR Spectrum of Compound 8b

ATK-SY-P24D-13C.1.fid  
ATK-SY-P24D-13C

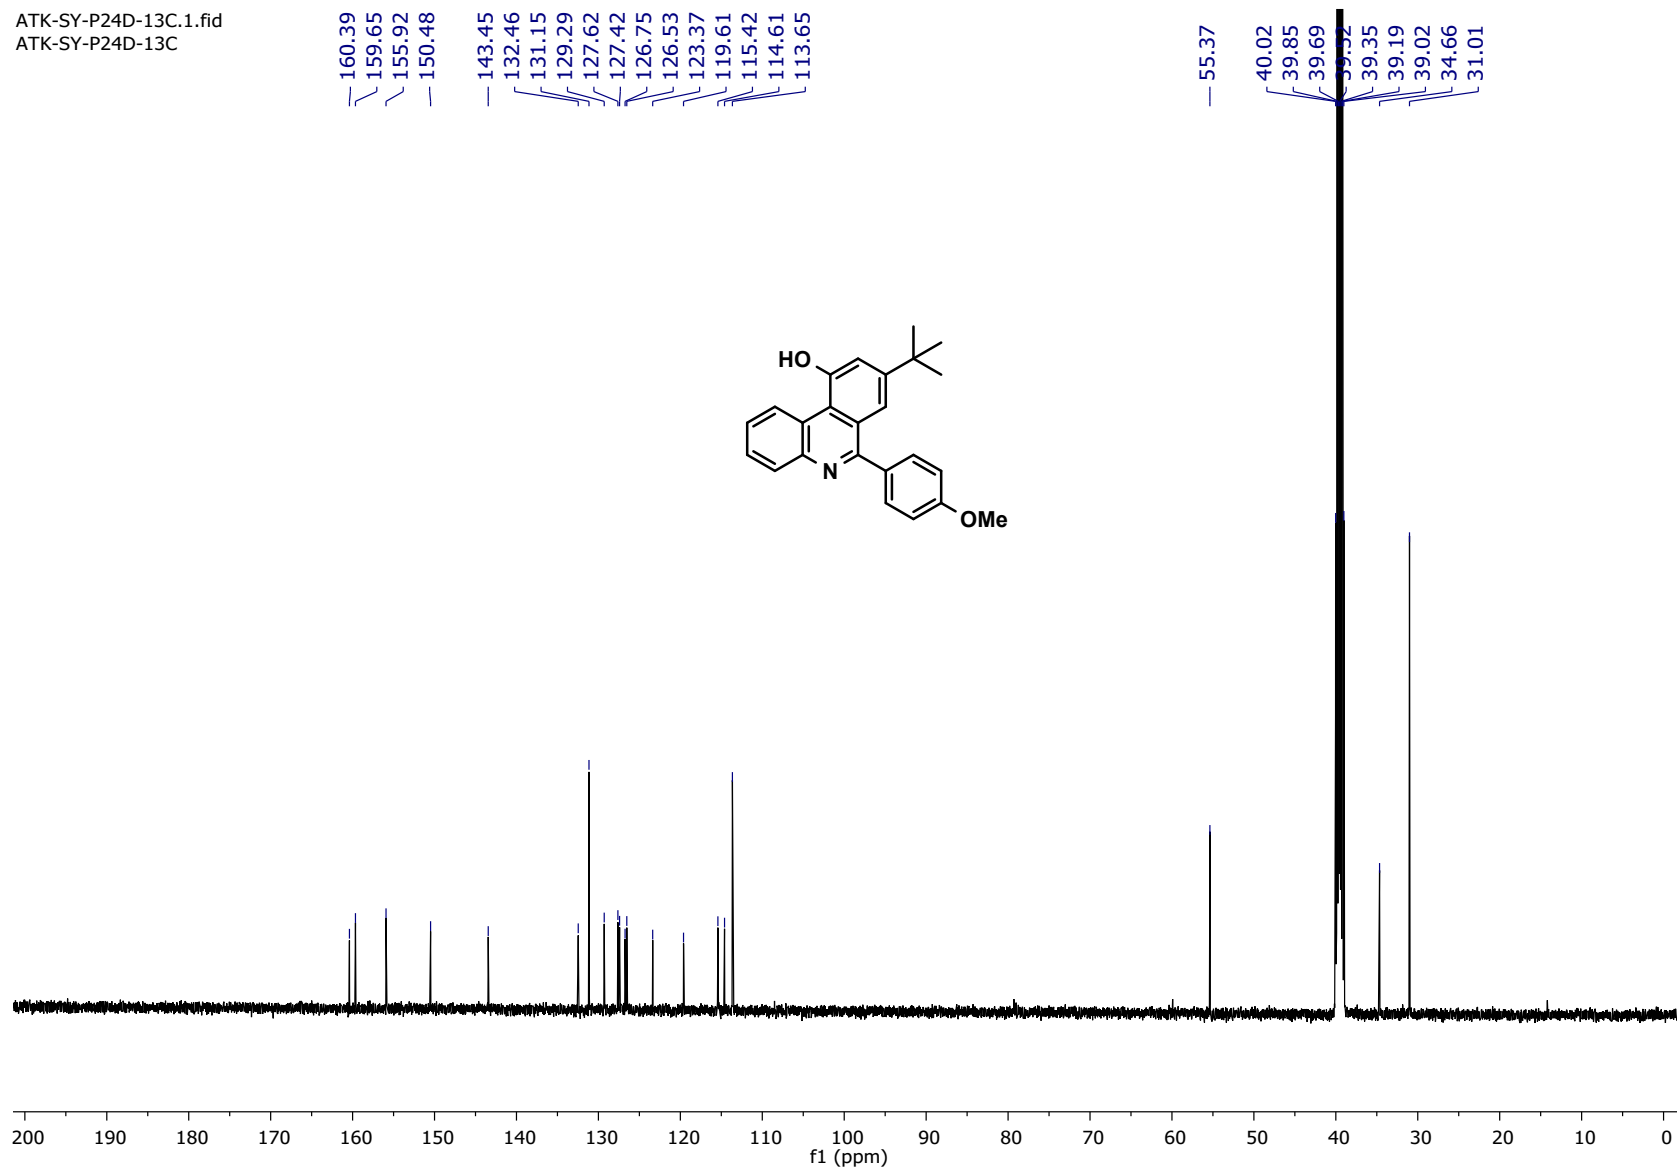

## HRMS Spectrum of Compound 8b

|             |                      |                        |         |                 |                                   |
|-------------|----------------------|------------------------|---------|-----------------|-----------------------------------|
| Sample Name | P24D                 | Position               | P1-A2   | Instrument Name | Instrument 1                      |
| User Name   |                      | Inj Vol                | 10      | InjPosition     |                                   |
| Sample Type | Sample               | IRM Calibration Status | Success | Data Filename   | P24D_002.d                        |
| ACQ Method  | FULL SCAN-POSITIVE.m | Comment                |         | Acquired Time   | 18-Aug-22 12:12:14 PM (UTC+05:30) |

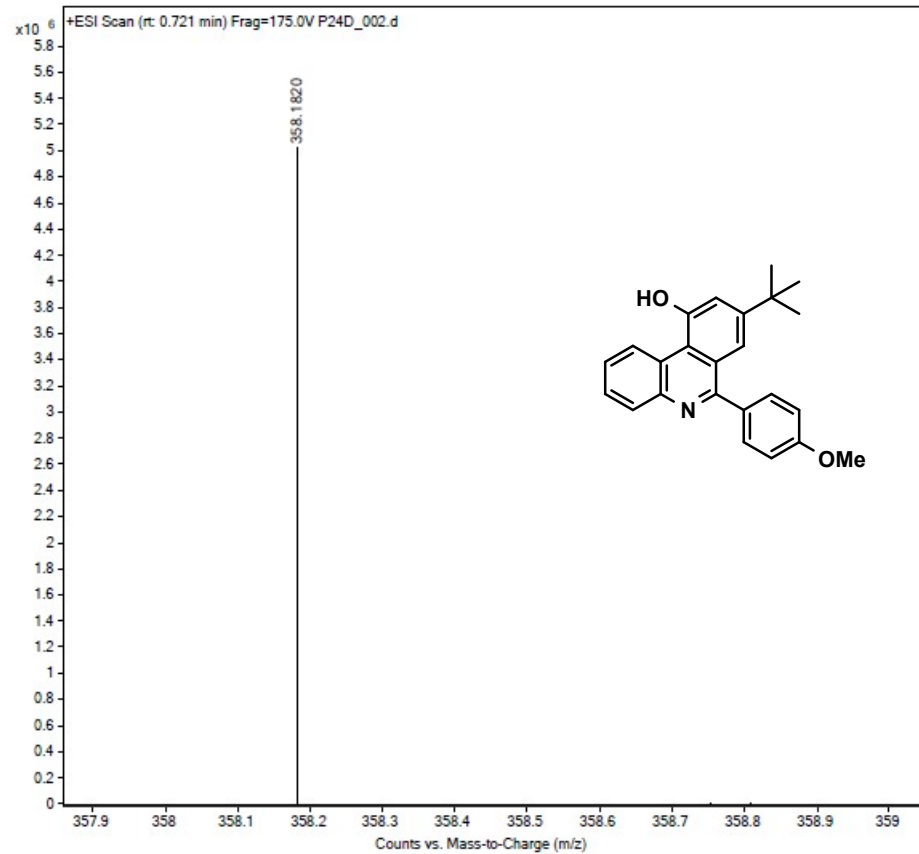

# <sup>1</sup>H NMR Spectrum of Compound 8d

ATK-SY-P48D-1H.1.fid — ATK-SY-P48D-1H

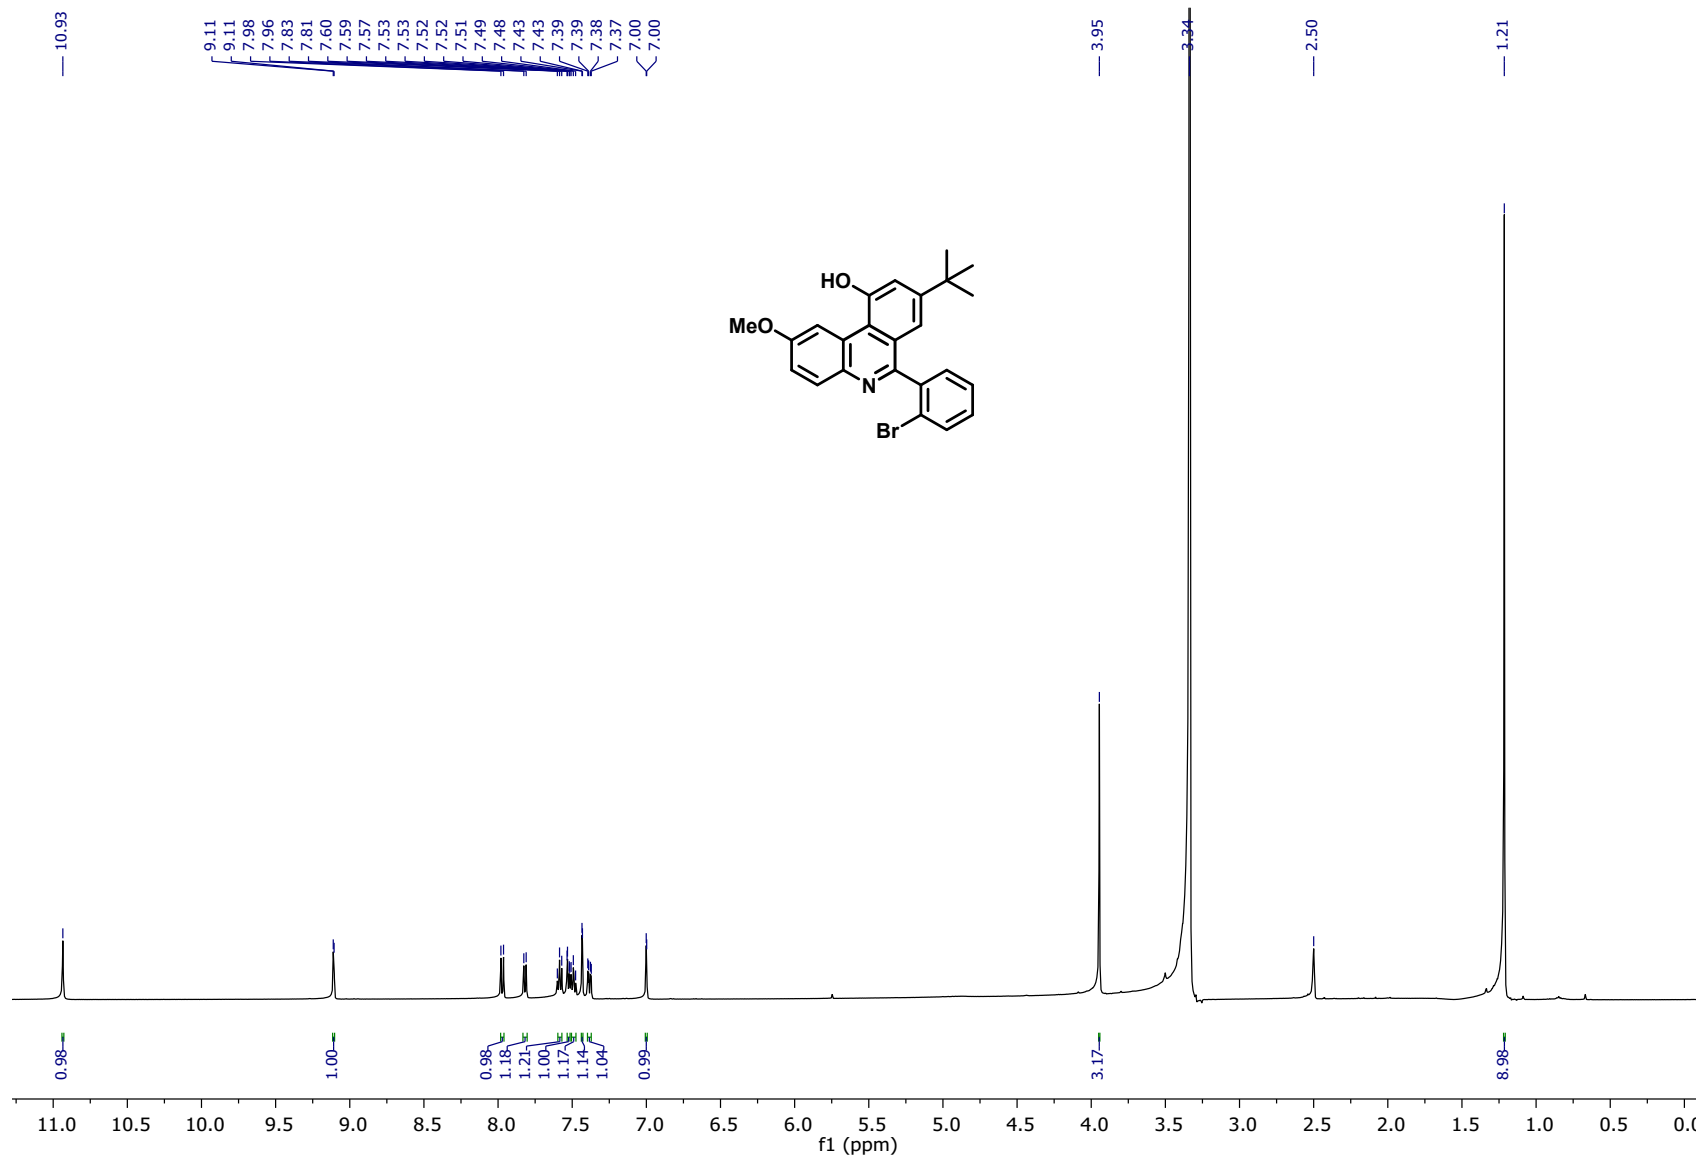

S120



# <sup>13</sup>C NMR Spectrum of Compound 8d

ATK-SY-P48D-13C.3.fid  
ATK-SY-P48D-13C

157.75  
157.63  
155.88  
150.61

140.78  
138.29  
132.31  
131.22  
130.51  
130.22  
127.73  
126.76  
124.84  
122.32  
118.78  
116.59  
114.58  
114.08  
109.17

55.37  
40.02  
39.85  
39.69  
39.52  
39.35  
39.19  
39.02  
34.35  
30.78

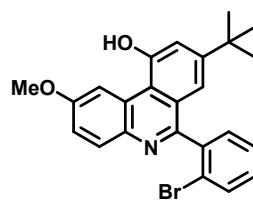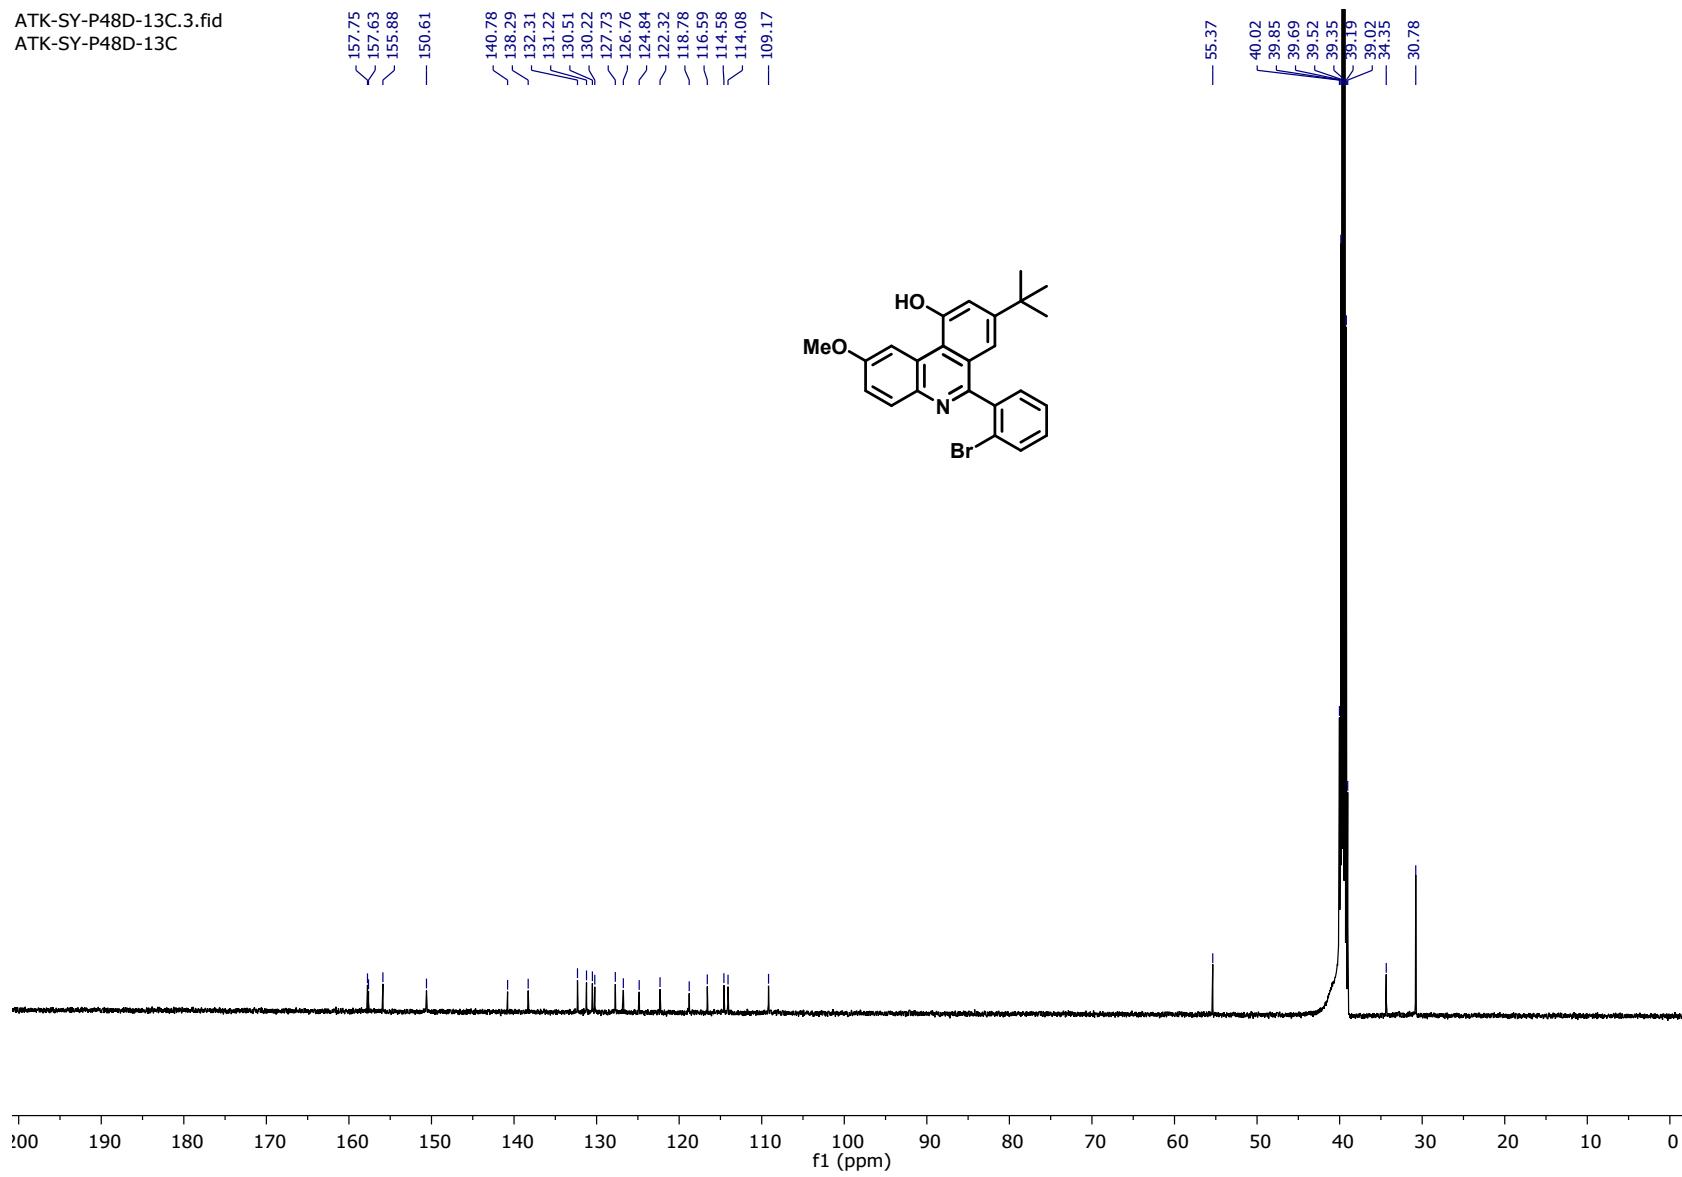

# HRMS Spectrum of Compound 8d

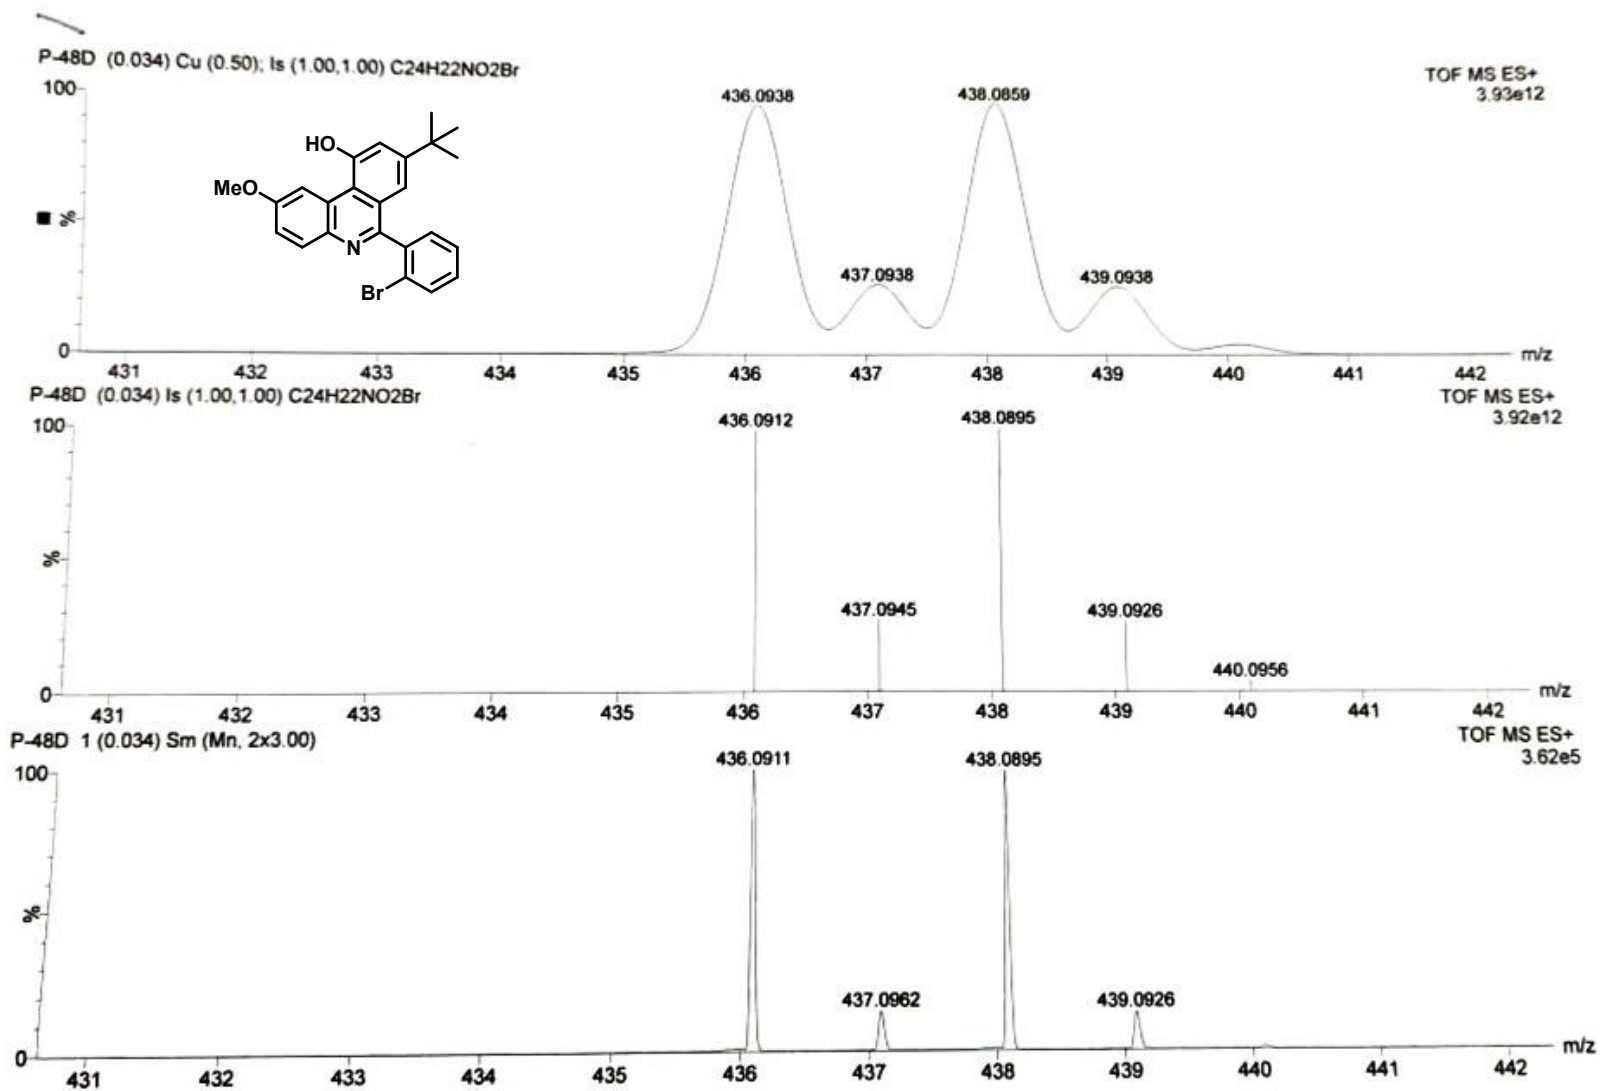

### Detection of intermediates in HRMS

2-naphthylamine (1 mmol), benzaldehyde (1 mmol), and 4-*tert*butylcyclohexanone (1 mmol), 20 mol% CSA (46 mg) were taken in a r.b and dissolved in 1 mL DMSO. The reaction mixture was stirred at 120 °C temperature in a preheated oil-bath. After 2 h, reaction was stopped and a very little amount of it was subjected to ESI-MS mass experiment, and the intermediates **E**, **F**, **H** and **K** were detected by HRMS values. The spectra and observed  $m/z$  values for the intermediates are given below.

## HRMS Spectrum of Intermediate E or F of compound 41

Sample Name  
User Name  
Sample Type  
ACQ Method

AD-SY-M  
Sample  
Direct Mass-2017.m

Position  
Inj Vol  
IRM Calibration Status  
Comment

Vial 25  
0.1  
Some Ions Missed

Instrument Name  
InjPosition  
Data Filename  
Acquired Time

Instrument 1  
AD-SY-M.d  
28-Mar-22 09:14:42 PM (UTC+05:30)

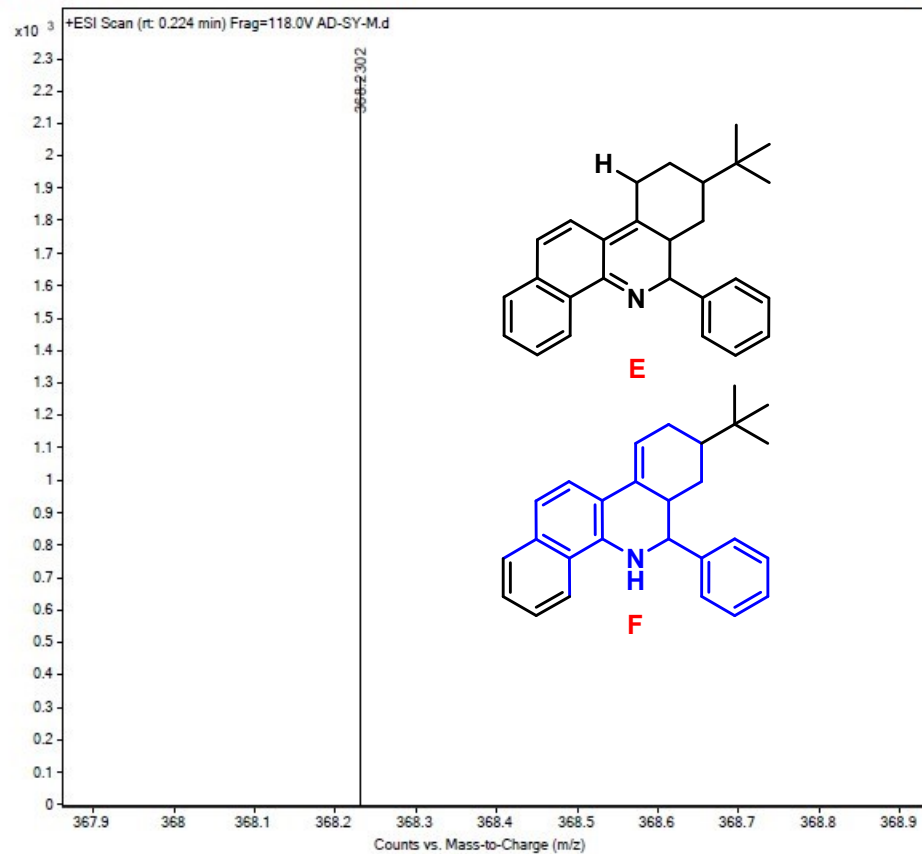

HRMS (ESI) Calcd for  $C_{27}H_{30}N$  368.2373 ( $M + H^+$ ); Found 368.2302

## HRMS Spectrum of Intermediate H of compound 4l

|             |                    |                        |                  |                 |                                   |
|-------------|--------------------|------------------------|------------------|-----------------|-----------------------------------|
| Sample Name | AD-SY-M            | Position               | Vial 25          | Instrument Name | Instrument 1                      |
| User Name   |                    | Inj Vol                | 0.1              | InjPosition     |                                   |
| Sample Type | Sample             | IRM Calibration Status | Some Ions Missed | Data Filename   | AD-SY-M.d                         |
| ACQ Method  | Direct Mass-2017.m | Comment                |                  | Acquired Time   | 28-Mar-22 09:14:42 PM (UTC+05:30) |

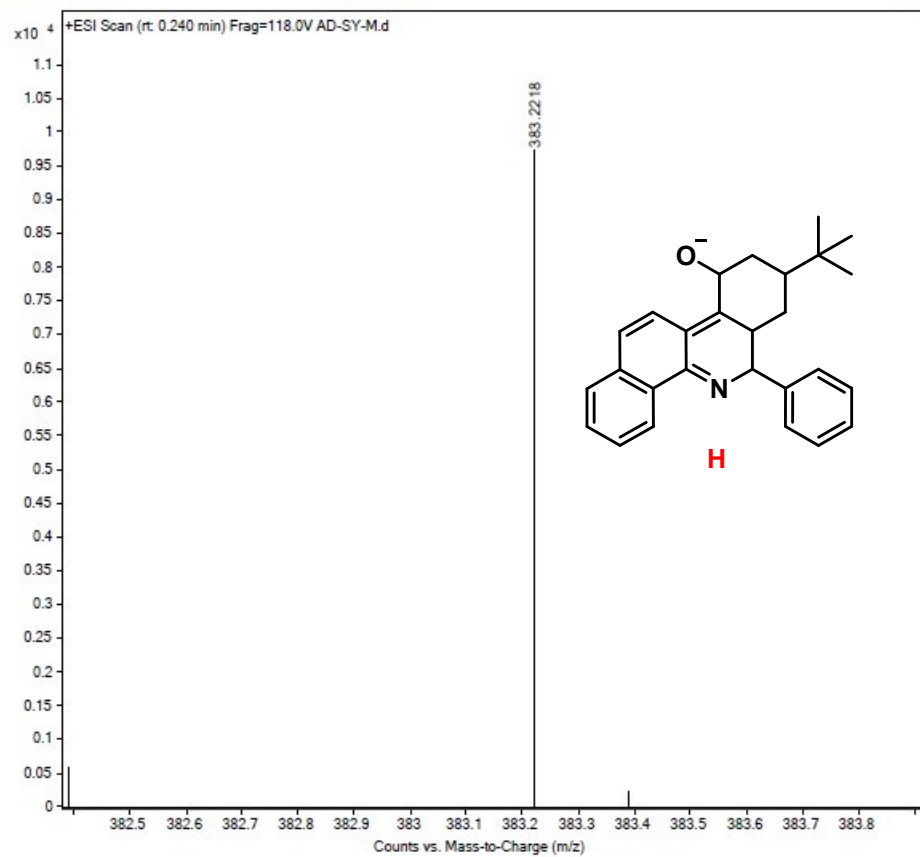

HRMS (ESI) Calcd for  $C_{27}H_{29}NO$  383.2249 ( $M + H^+$ ); Found 383.2218

## HRMS Spectrum of Intermediate K of compound 41

|             |                    |                        |                  |                 |                                   |
|-------------|--------------------|------------------------|------------------|-----------------|-----------------------------------|
| Sample Name | AD-SY-M            | Position               | Vial 25          | Instrument Name | Instrument 1                      |
| User Name   |                    | Inj Vol                | 0.1              | InjPosition     |                                   |
| Sample Type | Sample             | IRM Calibration Status | Some Ions Missed | Data Filename   | AD-SY-M.d                         |
| ACQ Method  | Direct Mass-2017.m | Comment                |                  | Acquired Time   | 28-Mar-22 09:14:42 PM (UTC+05:30) |

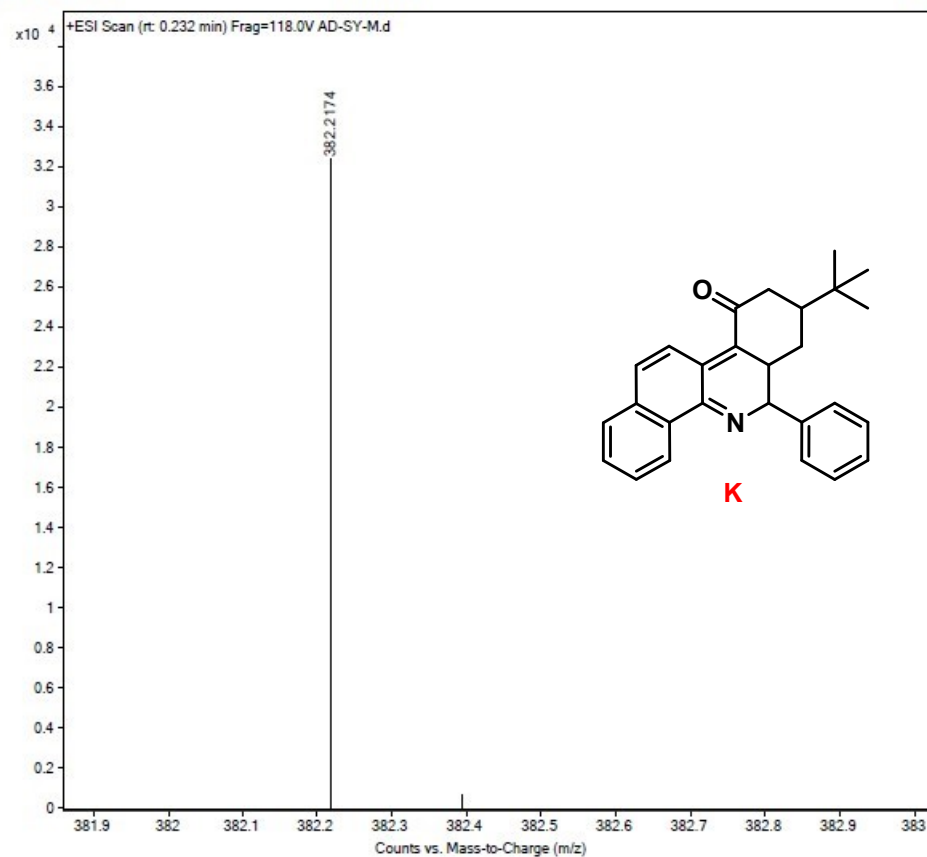

HRMS (ESI) Calcd for  $C_{27}H_{28}NO$  382.2166 ( $M + H^+$ ); Found 382.2174

### Stock solutions preparation

The stock solutions of the chemosensors (**4s**, **4x** and **4u**) were prepared in DMSO at  $10^{-3}$  M and the solutions were diluted as per experimental requirements. The anionic salts (with tetrabutylammonium counterion), like  $F^-$ ,  $HSO_4^-$ ,  $PO_4^{3-}$ ,  $OAc^-$ ,  $Cl^-$ ,  $Br^-$ ,  $I^-$ ,  $CN^-$ ,  $CO_3^{2-}$ ,  $ClO_4^-$ ,  $NO_3^-$ ,  $N_3^-$  etc. were prepared in  $10^{-2}$  M in DMSO/H<sub>2</sub>O (v/v 7/3) and were similarly diluted as per requirement.

**Table S3.** Optical data of **4s**, **4x**, and **4u** in different organic solvents.

| Solvents                  | $\lambda_{Em}$ /nm |           |           |
|---------------------------|--------------------|-----------|-----------|
|                           | <b>4s</b>          | <b>4x</b> | <b>4u</b> |
| Hexane                    | 430                | 434       | 440       |
| Dichloromethane (DCM)     | 435                | 434       | 448       |
| Methanol (MeOH)           | 448                | 438       | 460       |
| Acetonitrile (MeCN)       | 437                | 438       | 447       |
| Dimethyl sulfoxide (DMSO) | 442                | 450       | 454       |

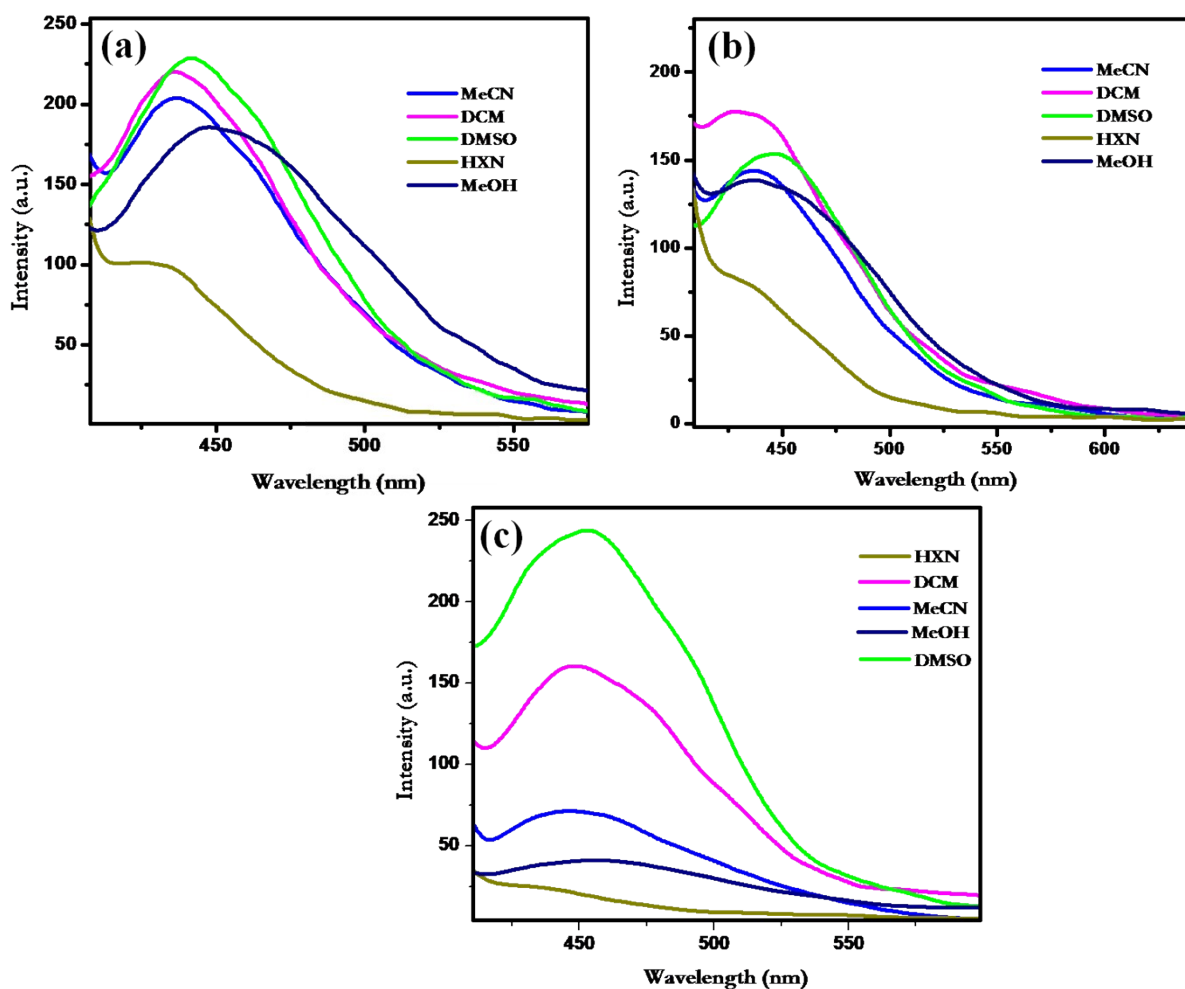

**Figure S2.** Emission spectral changes of (a) **4s**, (b) **4x** and (c) **4u** in different organic solvents.

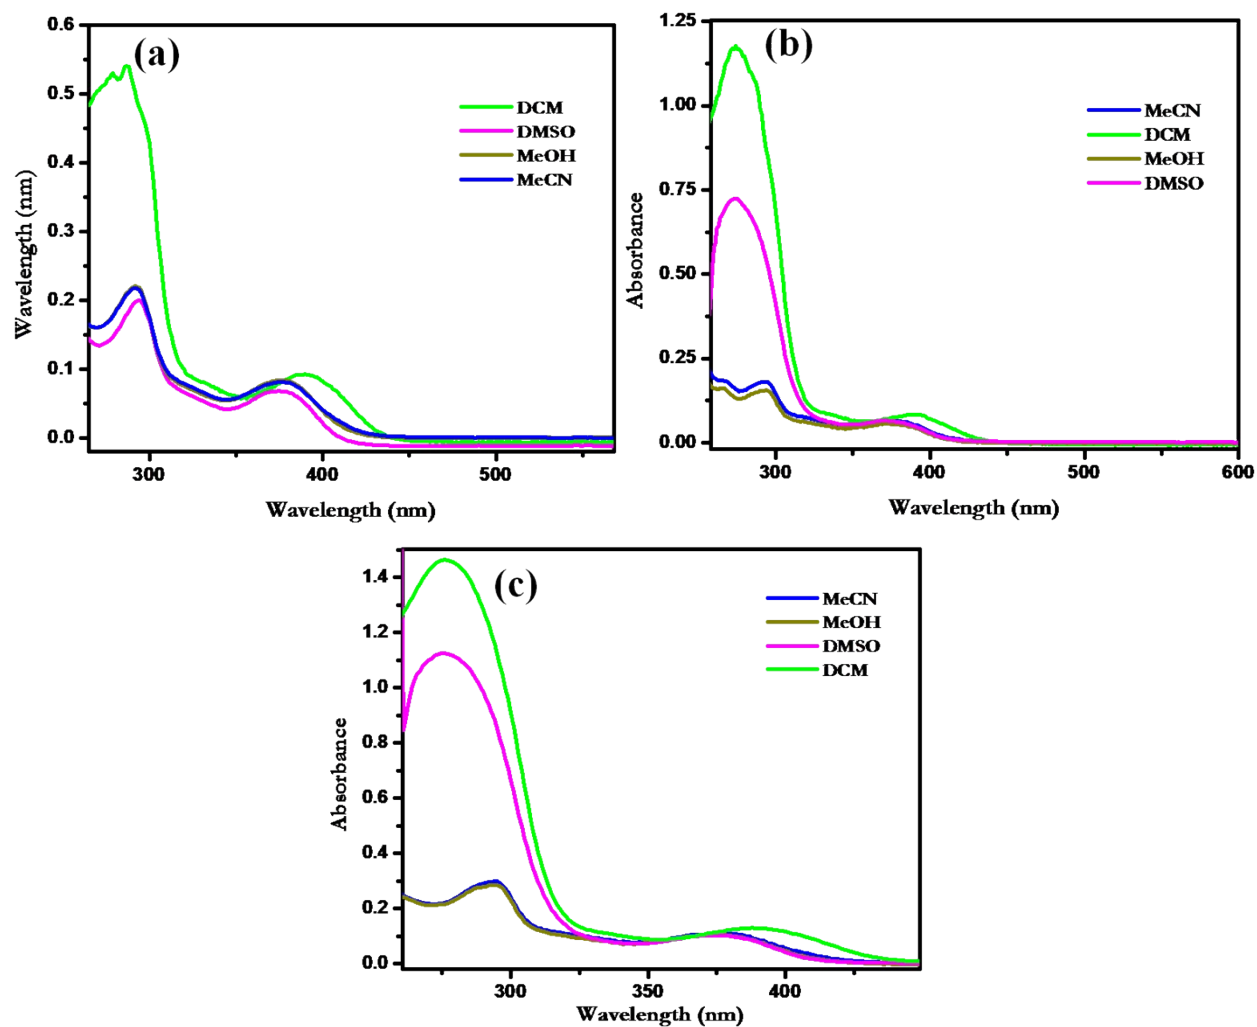

Figure S3. UV-Vis absorption spectral changes of (a) 4s, (b) 4x and (c) 4u in different organic solvents.

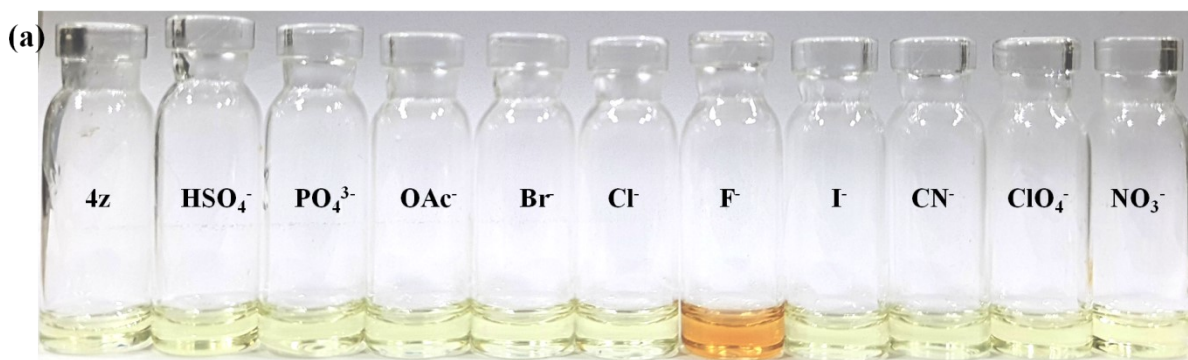



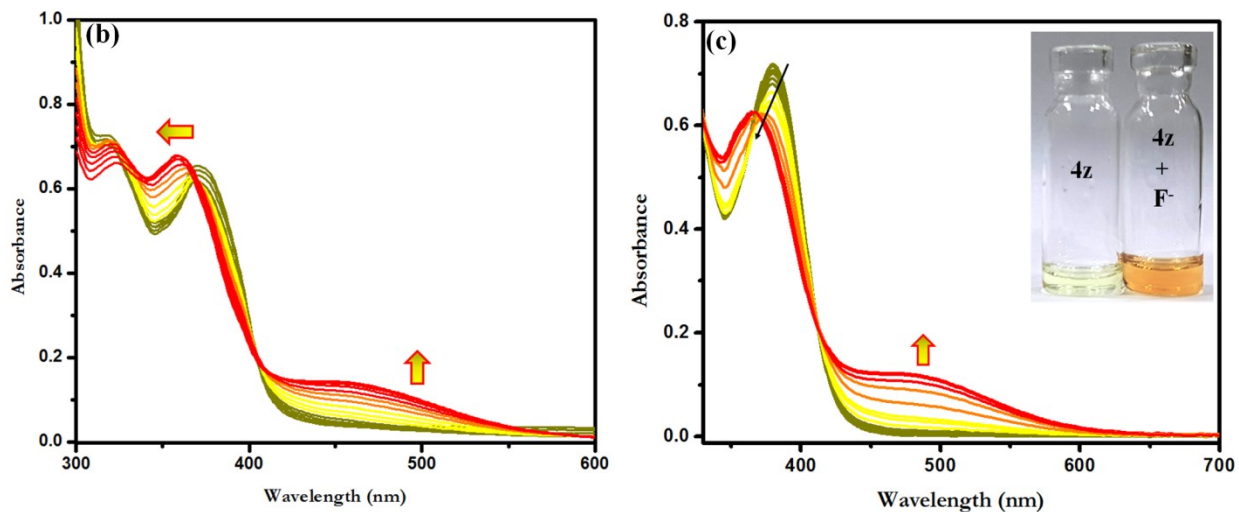

**Figure S4.** (a) Selectivity of **4z** in presence of diverse anions; UV-Vis titration of (b) **4x** and (c) **4z** (100  $\mu\text{M}$  in DMSO) in presence of 60  $\mu\text{L}$  and 100  $\mu\text{L}$   $\text{F}^-$  in 0.5 mM DMSO/ $\text{H}_2\text{O}$  (v/v 7/3) respectively.

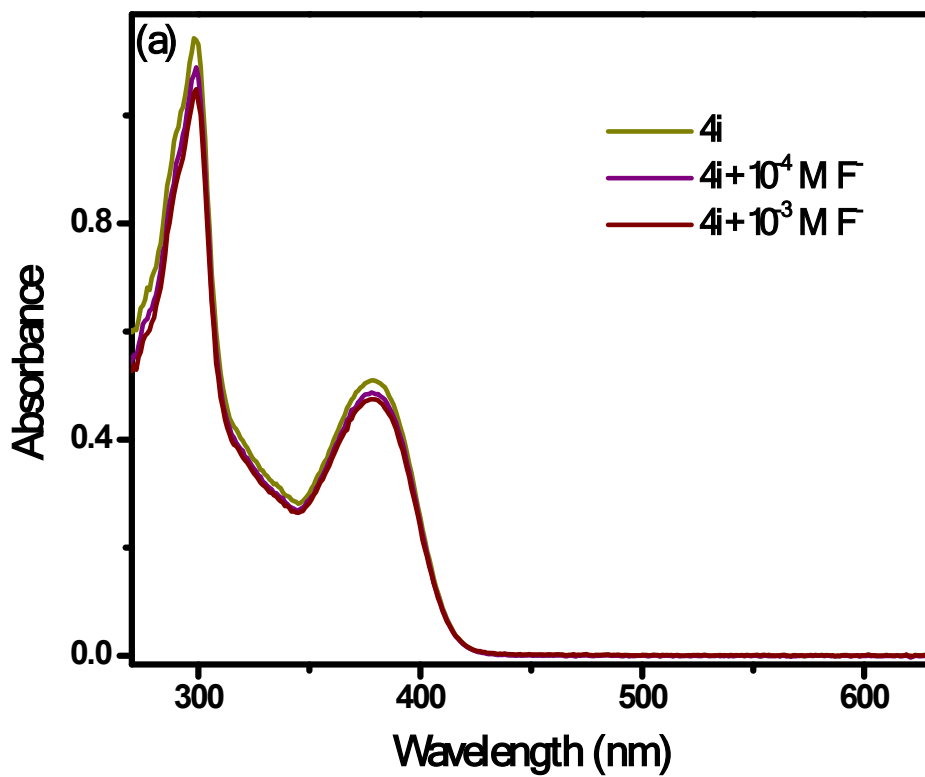

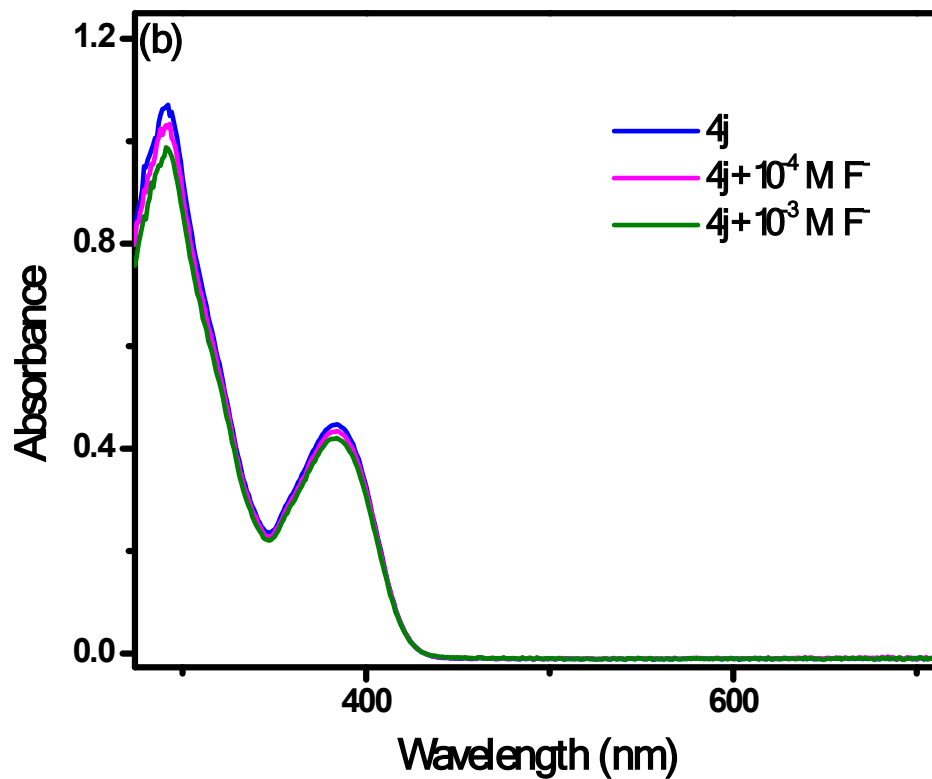

**Figure S5.** UV-Vis spectral data of (a) 4i (100  $\mu$ M in DMSO) (b) 4j (100  $\mu$ M in DMSO) in presence of F<sup>-</sup> in DMSO/H<sub>2</sub>O (v/v 7/3).

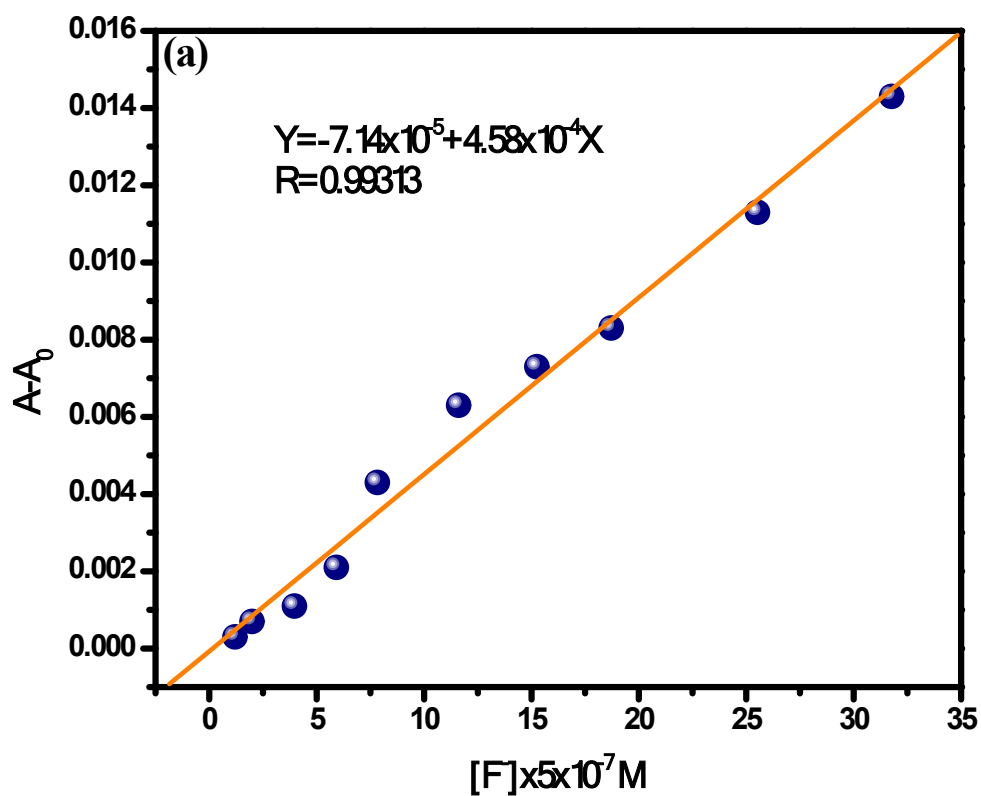

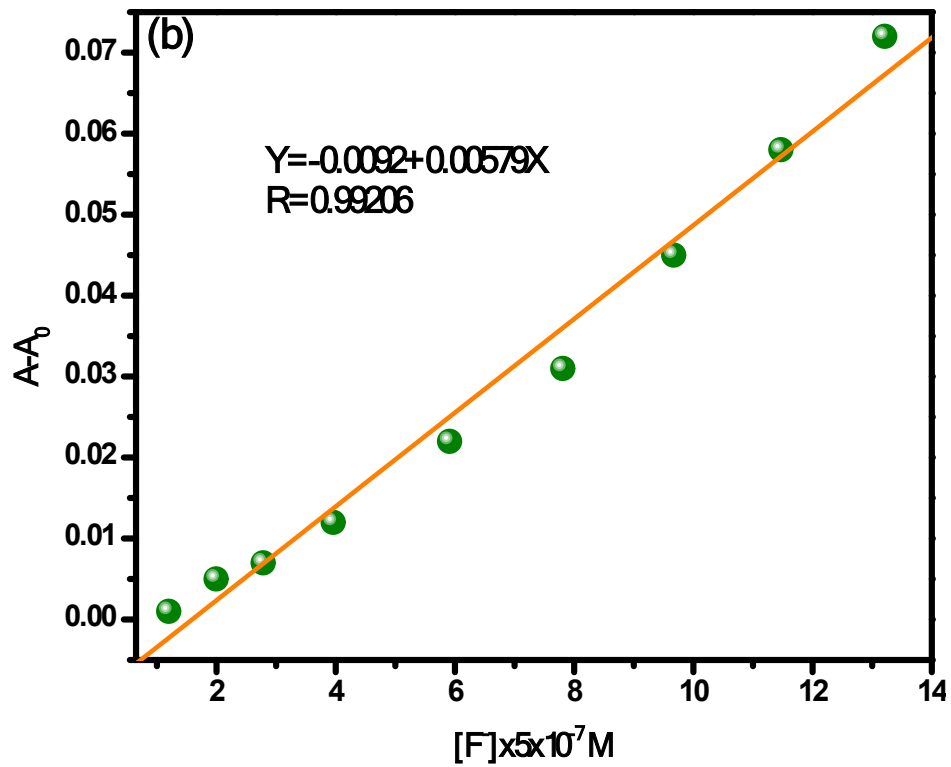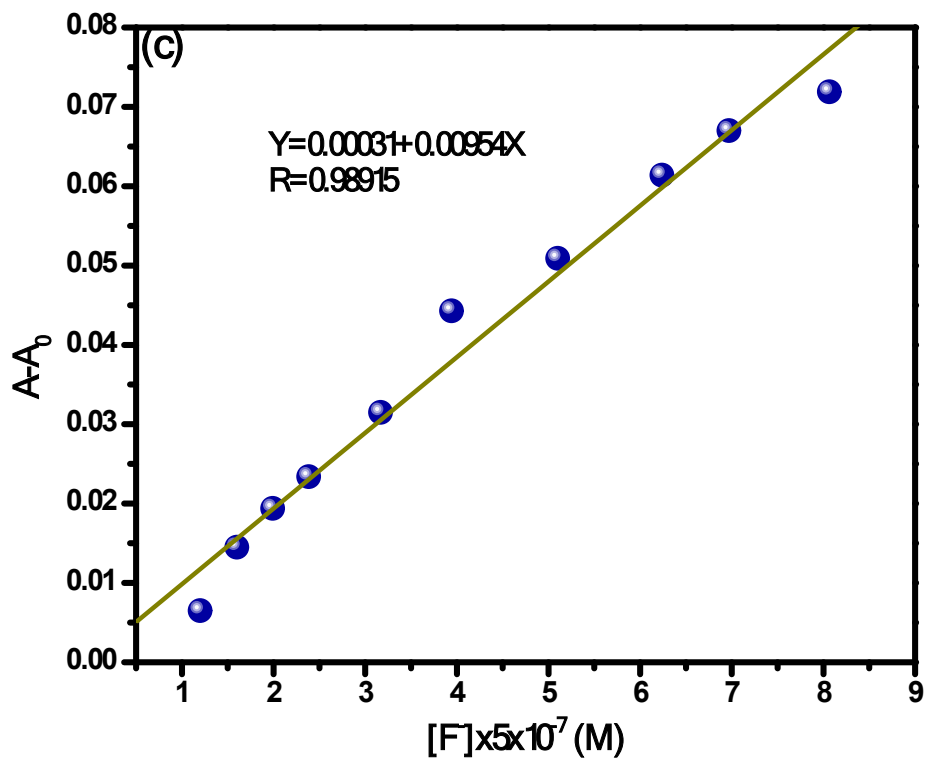

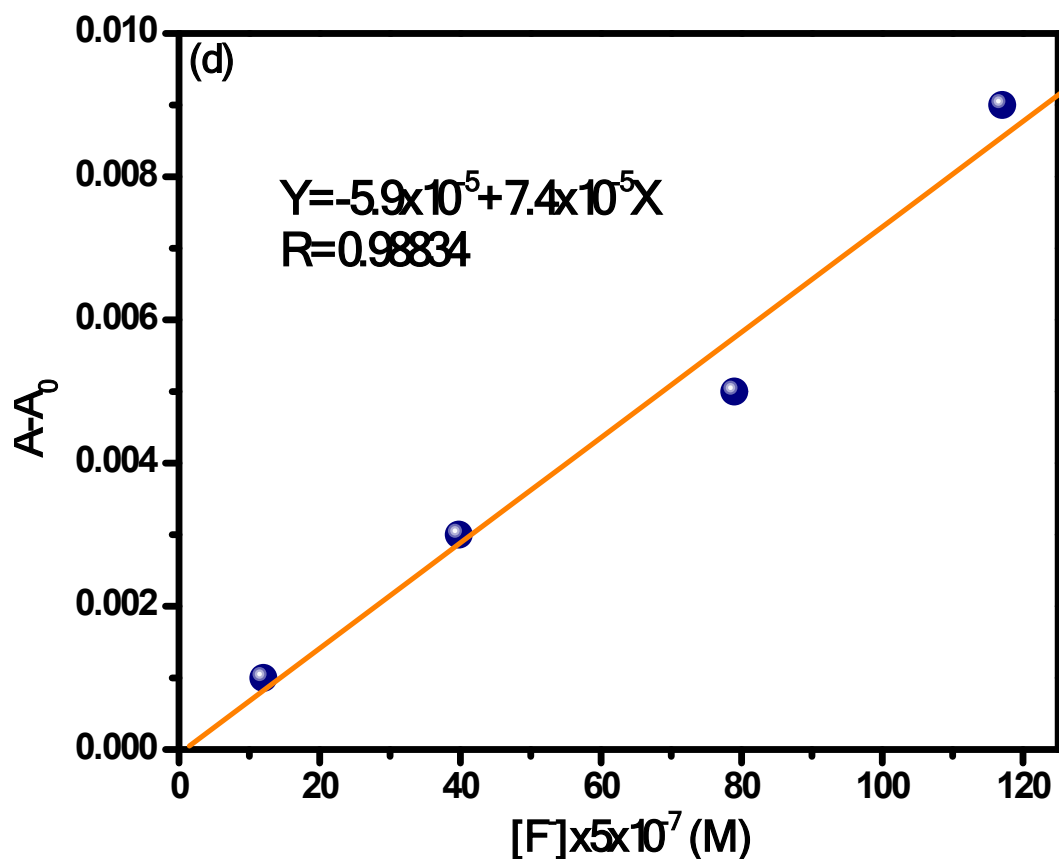

Figure S6. Calculation of LOD of (a) 4s, (b) 4x, (c) 4u and (d) 4z towards F<sup>-</sup>.

Table S4. Comparative literature survey of the recently reported F<sup>-</sup> specific chemosensors

| Sl. No. | Sensing materials                                                      | LOD      | Response time | Solid state sensing | Application in molecular electronics | Ref. |
|---------|------------------------------------------------------------------------|----------|---------------|---------------------|--------------------------------------|------|
| 1.      | Porphyrin-based receptor                                               | 10 μM    | -             | NO                  | NO                                   | S1   |
| 2.      | Bispyrenyl thioureas-polyethylene glycol (PEG)conjugatesbased receptor | 2.43 μM  | -             | NO                  | NO                                   | S2   |
| 3.      | Schiff base chemosensor                                                | 0.12 μM  | -             | NO                  | YES                                  | S3   |
| 4.      | Triphenylphosphoniumsalt based receptor                                | 0.2 ppm  | -             | NO                  | NO                                   | S4   |
| 5.      | Nickel-POCOP Pincer Receptors                                          | 5.66 μM  | -             | NO                  | NO                                   | S5   |
| 6.      | Copper(II)bis(terpyridine) complex                                     | 5.07 μM  | -             | NO                  | NO                                   | S6   |
| 7.      | Carbon dotsbased receptor                                              | 1.26 μM  | -             | NO                  | NO                                   | S7   |
| 8.      | CdTe quantum dots                                                      | 0.285 μM | 15 min        | YES                 | NO                                   | S8   |

|     |                                                                                |                                                                                                                                     |       |     |     |                 |
|-----|--------------------------------------------------------------------------------|-------------------------------------------------------------------------------------------------------------------------------------|-------|-----|-----|-----------------|
|     | based receptor                                                                 |                                                                                                                                     |       |     |     |                 |
| 9.  | 2,3-dipyrrol-2'-yl-<br>quinoxaline based<br>receptor                           | 0.15 ppm                                                                                                                            | -     | NO  | NO  | S9              |
| 10. | 6-aryl-8,9-<br>dihydrobenzo[c]phenan<br>thridine-10(7H)-ones<br>based receptor | 4s: 2.5 $\mu$ M (0.65<br>ppm),<br>4x: 1.3 $\mu$ M (0.34<br>ppm) and<br>4u: 2.3 $\mu$ M (0.6<br>ppm)<br>4z: 6.9 $\mu$ M (2.2<br>ppm) | ~18 s | YES | YES | Present<br>work |

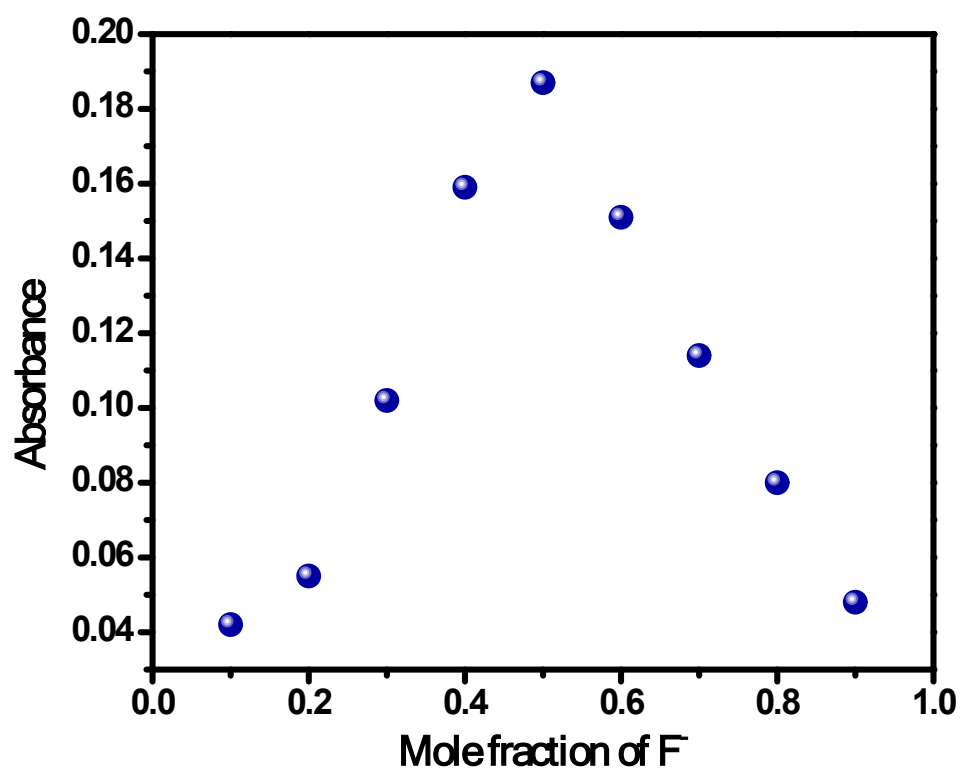

**Figure S7.** Job's plot of 4s with F for the stoichiometry determination monitoring the change of absorbance at 460 nm.

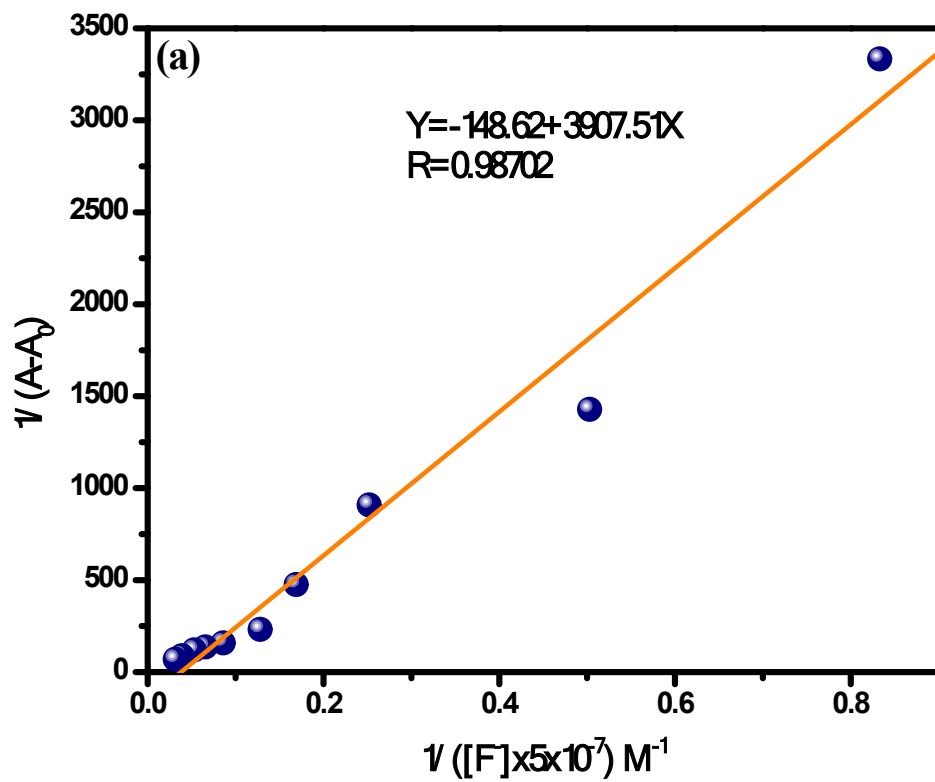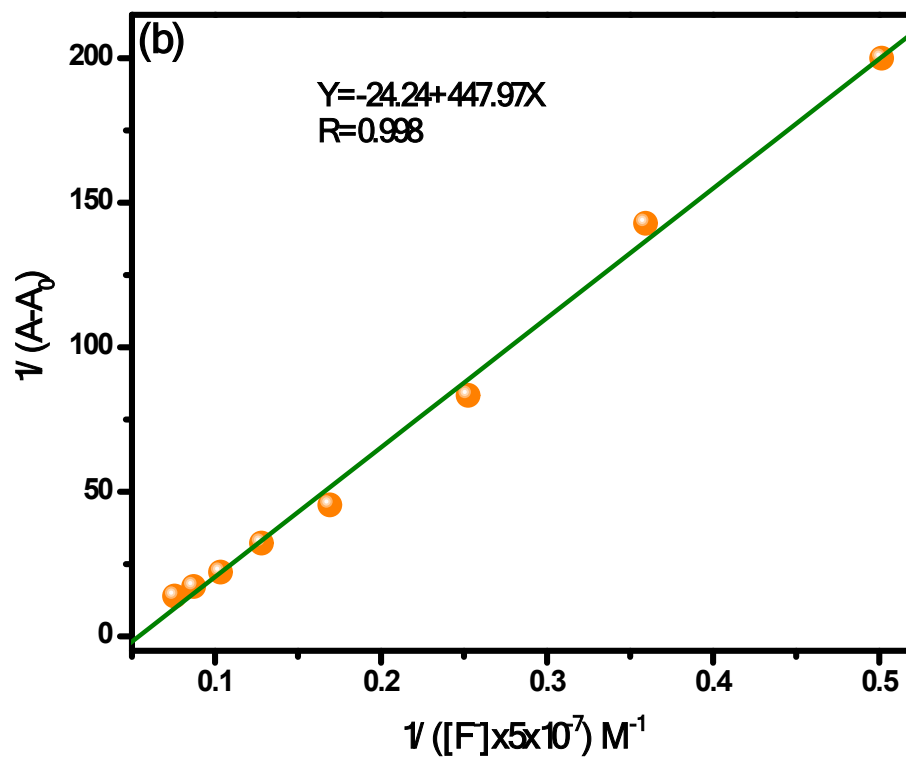

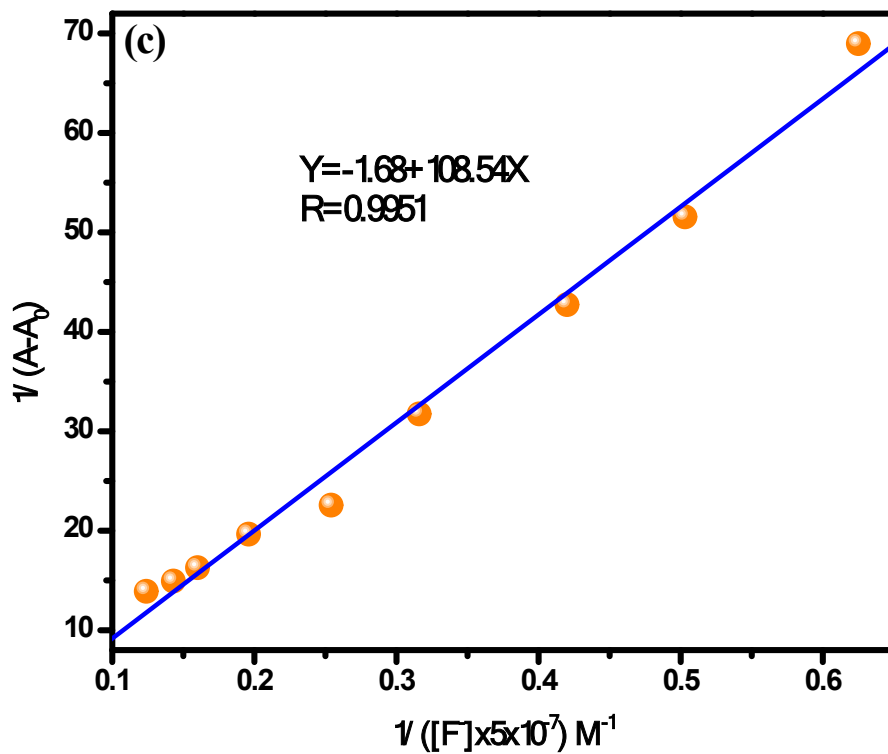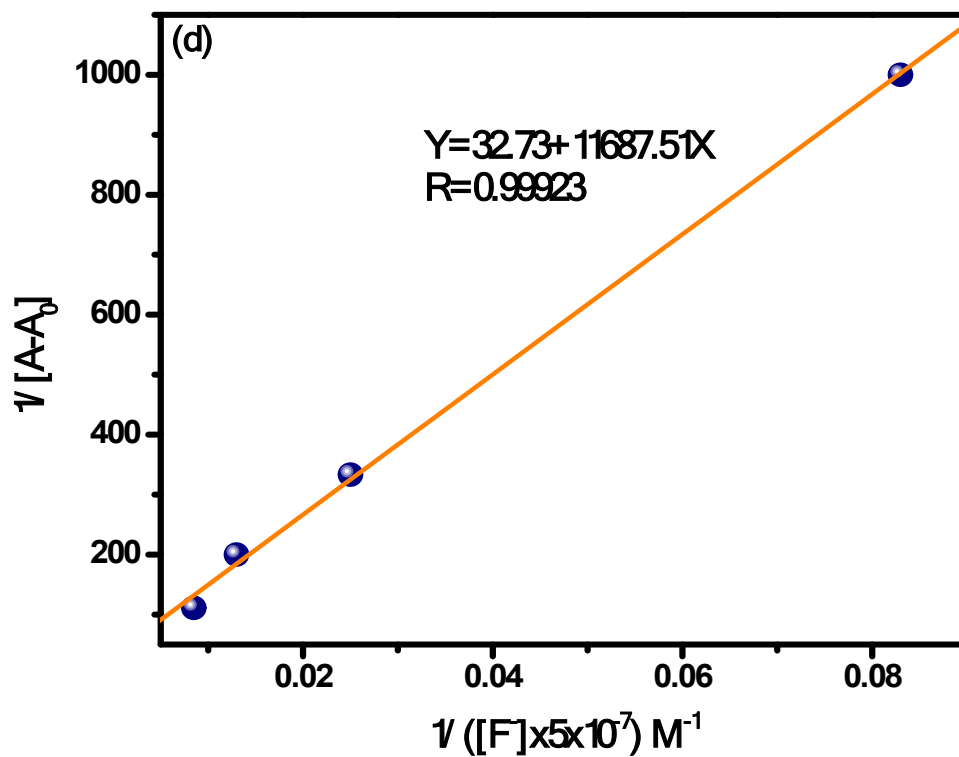

Figure S8. B-H plot of (a) 4s, (b) 4x, (c) 4u and (d) 4z for the association constant determination towards F.

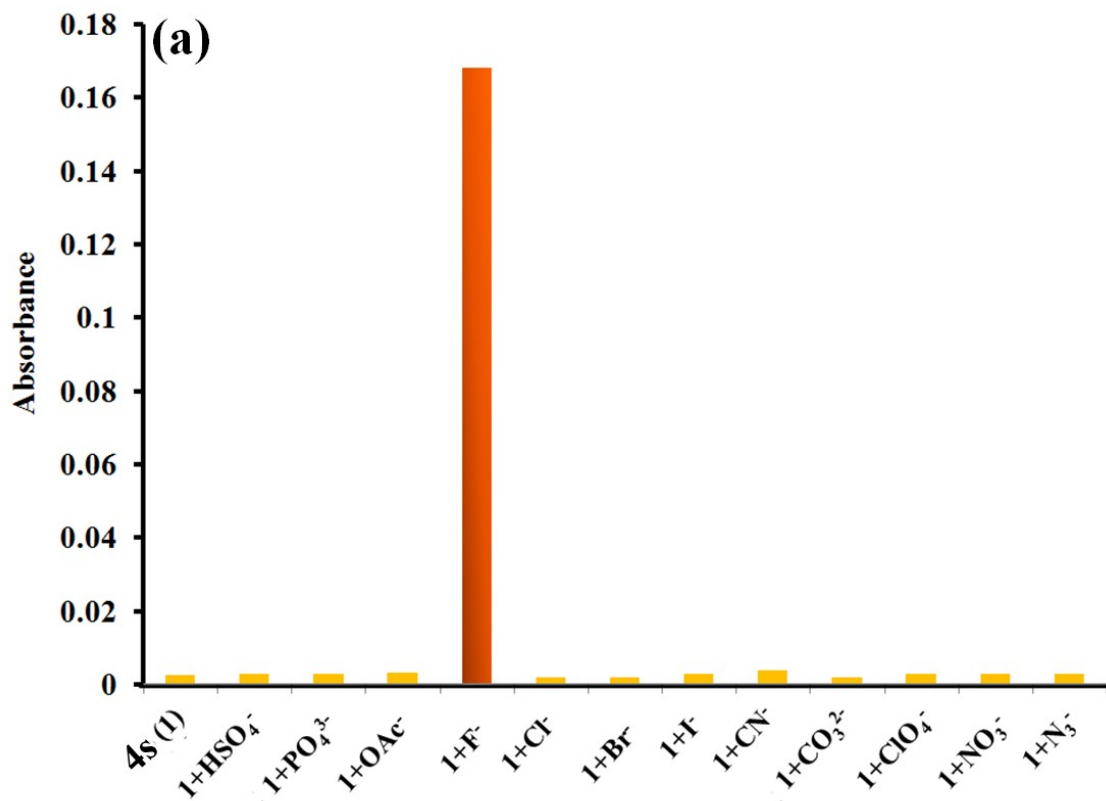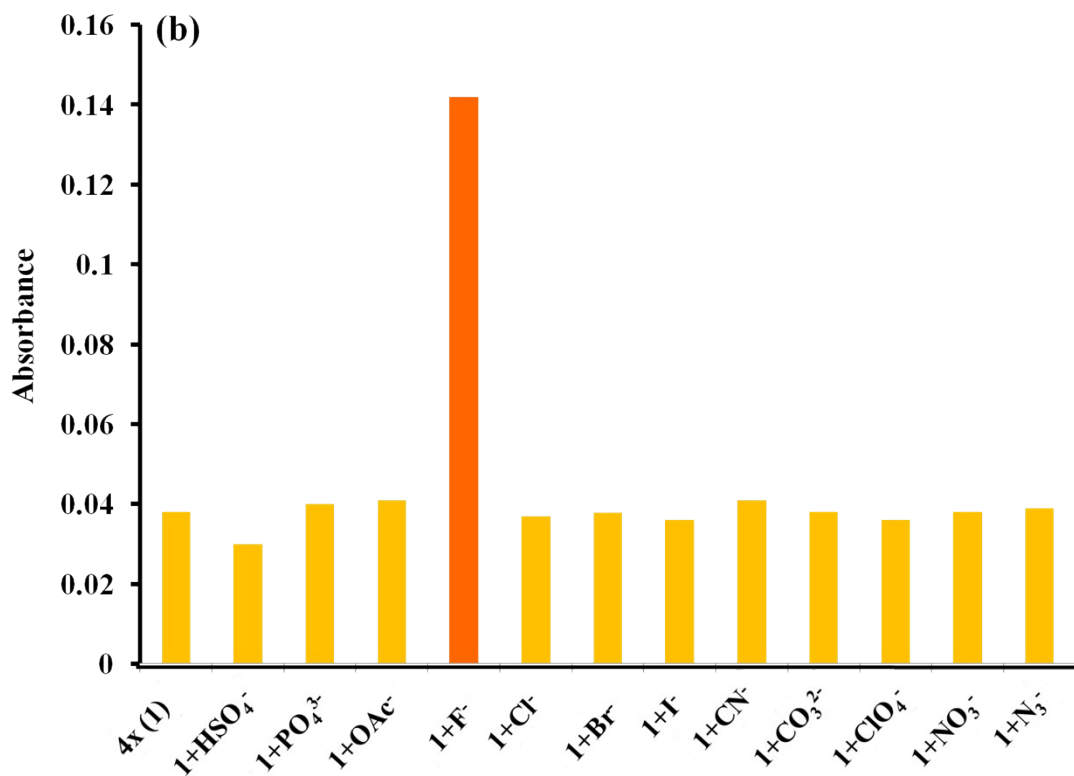



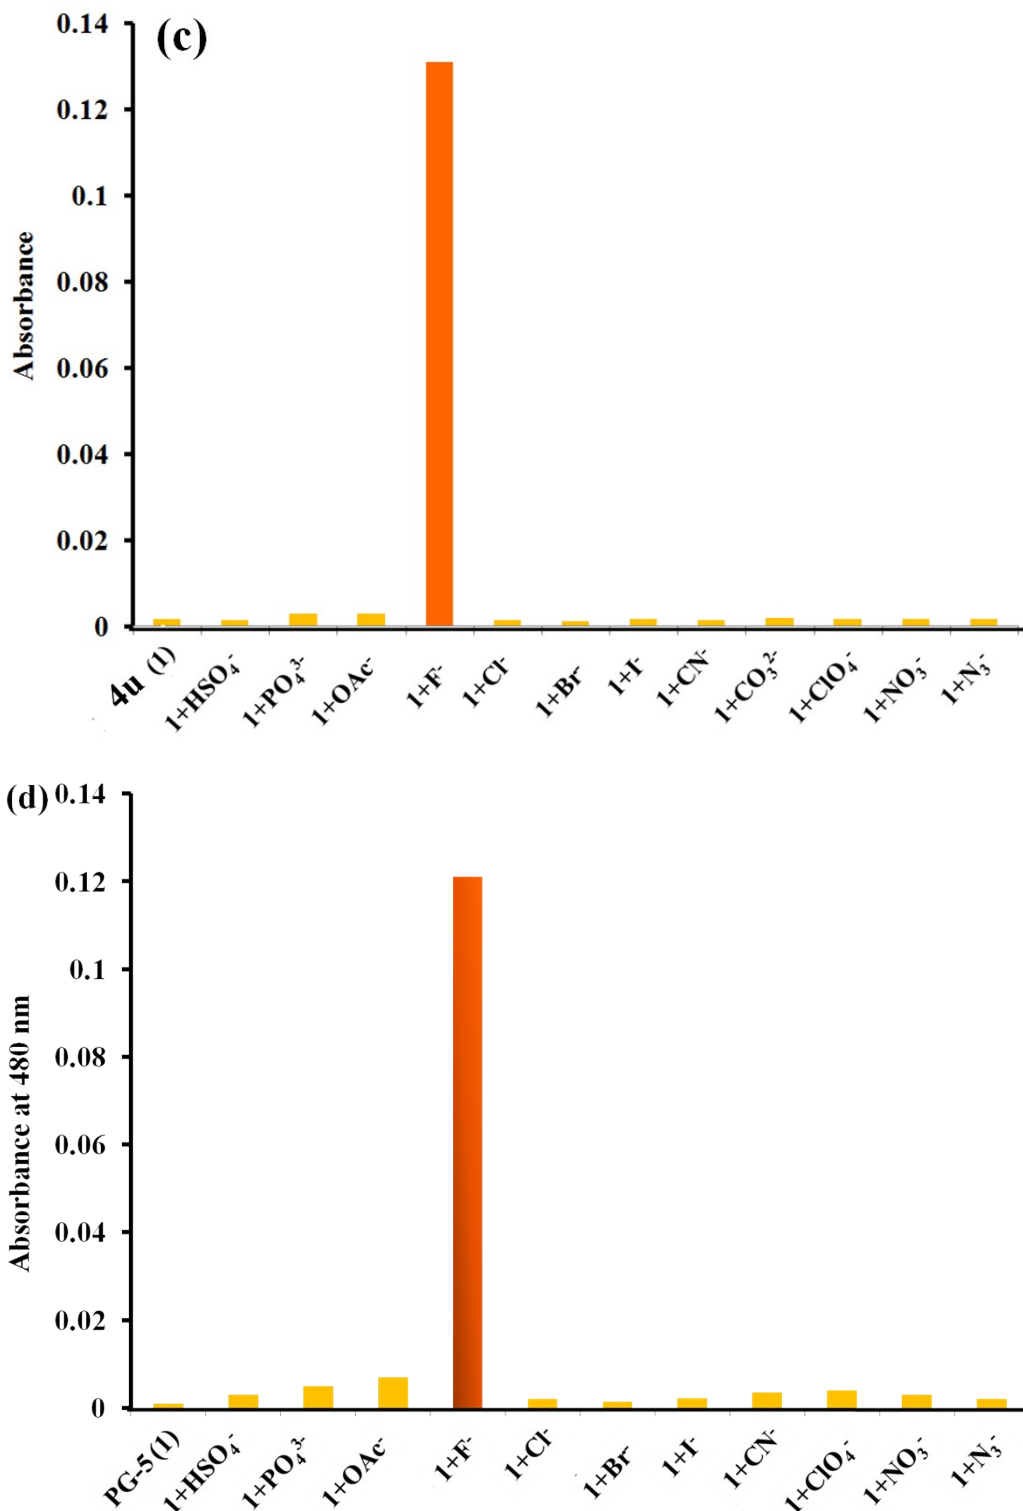

**Figure S9.** UV-Vis spectral response of (a) **4s**, (b) **4x** and (c) **4u** (100  $\mu$ M) in presence of different anions in 0.5 mM DMSO/H<sub>2</sub>O (v/v 7/3) at 460 nm and (d) UV-Vis spectral response of **4z** (100  $\mu$ M) in presence of different anions in 0.5 mM DMSO/H<sub>2</sub>O (v/v 7/3).

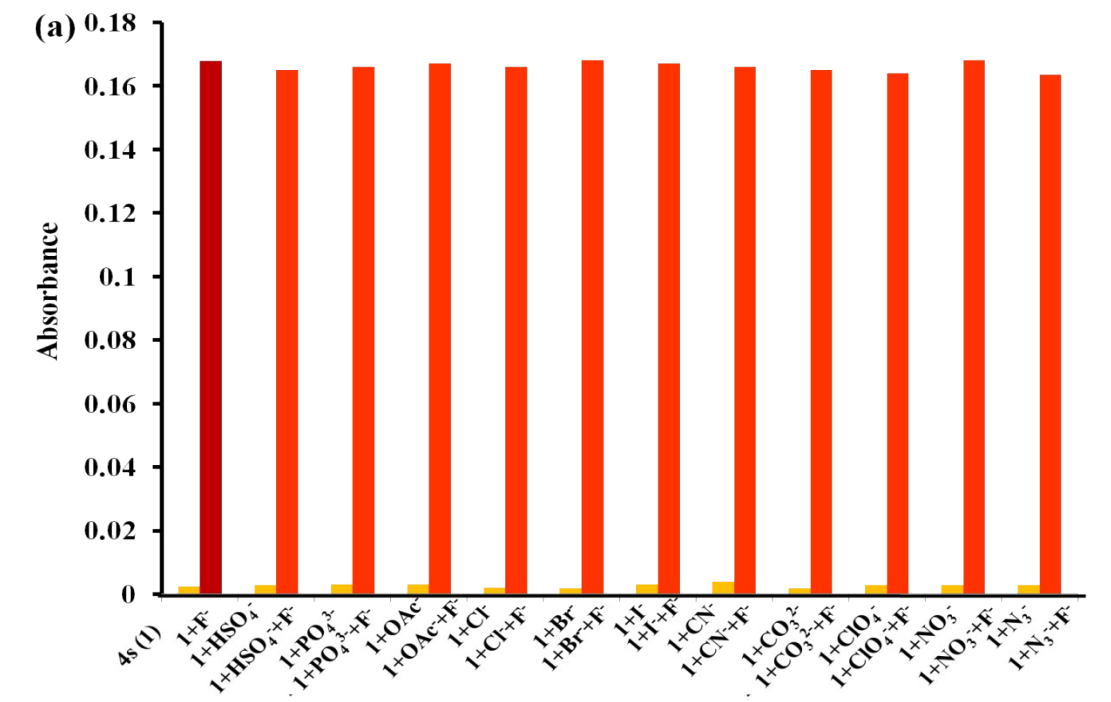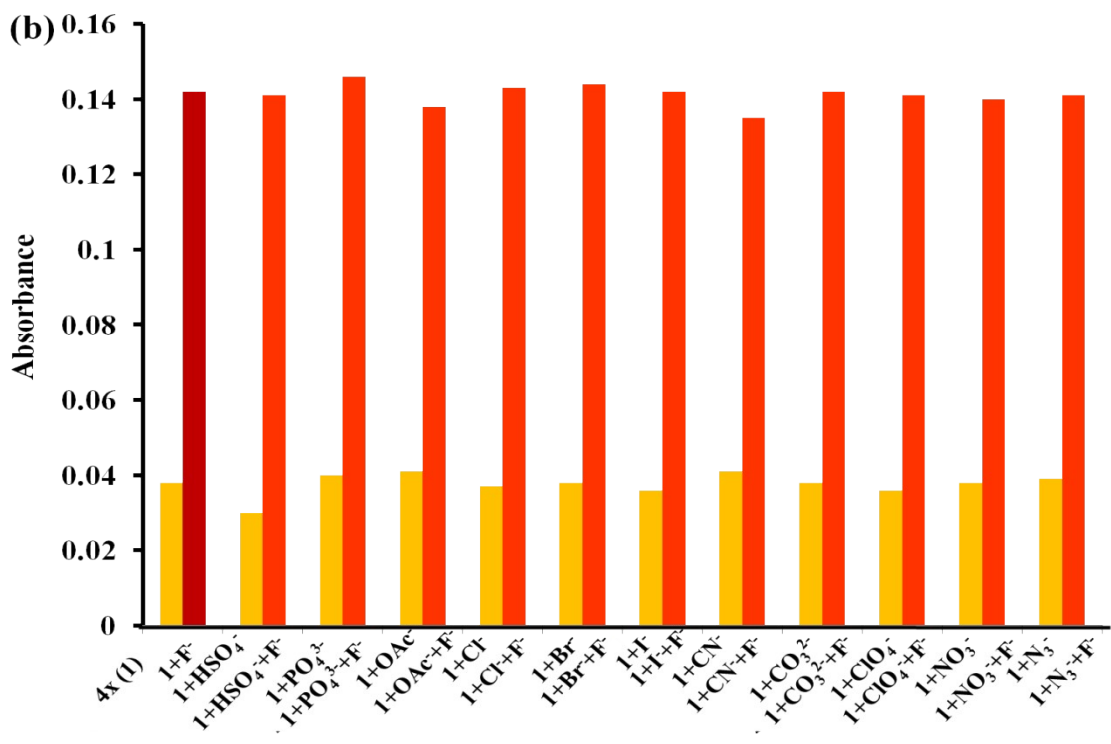

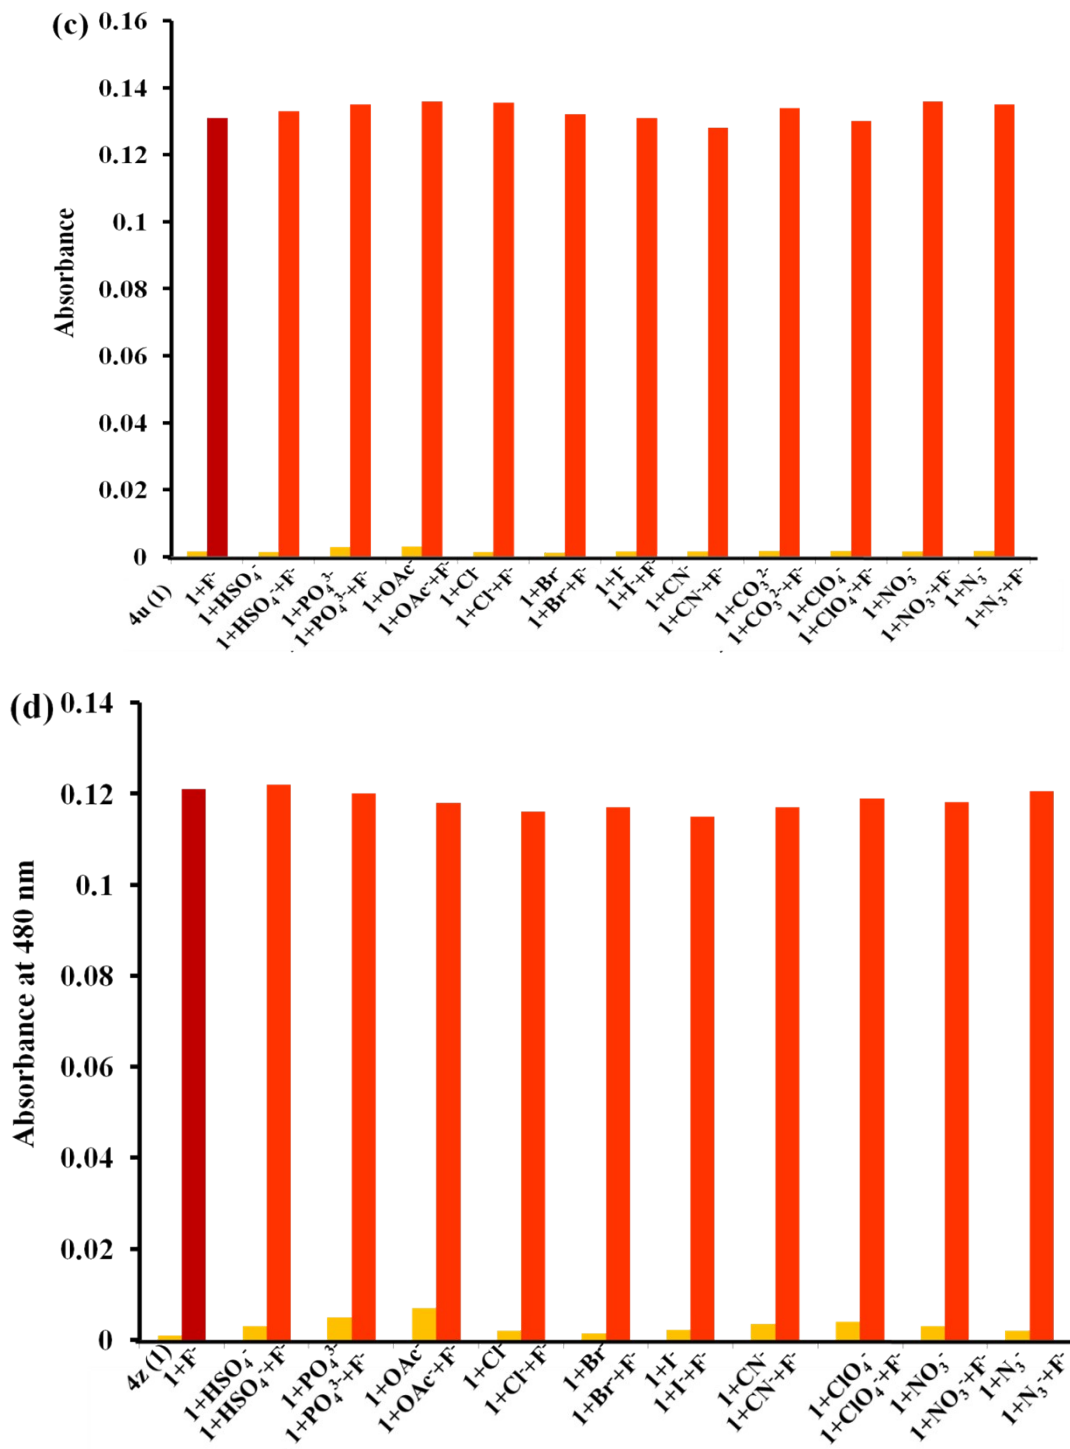

**Figure S10.** UV-Vis spectral response of (a) 4s, (b) 4x and (c) 4u (100 μM) towards F<sup>-</sup> in the co-existence of different anions in 0.5 mM DMSO/H<sub>2</sub>O (v/v 7/3) at 460 nm and (d) UV-Vis spectral response of 4z (100 μM) towards F<sup>-</sup> in the co-existence of different anions in 0.5 mM DMSO/H<sub>2</sub>O (v/v 7/3).

## Response time study of the chemosensors towards fluoride sensing

Response time of any sensing event is another important thing to be considered for real time applications. Therefore, to check the reaction kinetics of the chemosensors, 50  $\mu\text{L}$  0.5 mM  $\text{F}^-$  in DMSO/ $\text{H}_2\text{O}$  (v/v 7/3) was taken in **4s** (100  $\mu\text{M}$ , DMSO) and the absorption spectral changes were recorded as a function of time. From **Figure S11**, ESI, it has been observed that the absorbance at 460 nm reached maximum within  $\sim 18$  s and then remained almost constant. The photostability of the chemosensor was also confirmed by the almost constant absorbance values of the bare chemosensor at 460 nm. Thus, this kinetic study revealed that the interaction of the chemosensors with  $\text{F}^-$  rapidly reached the equilibrium condition, which indicates the real time applicability of the chemosensors for quantitative detection of  $\text{F}^-$  without any sample pretreatment.

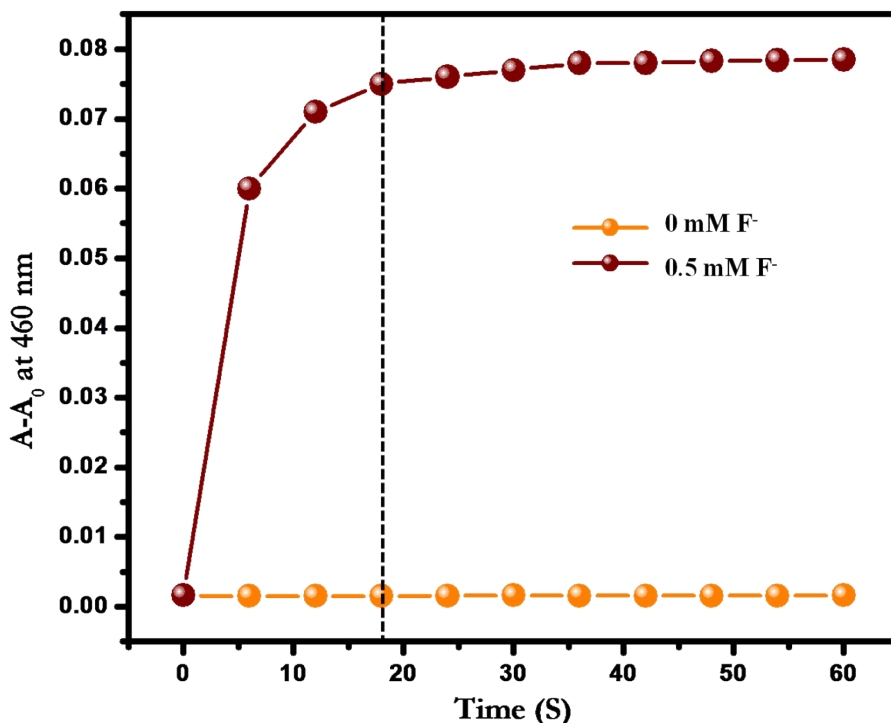

**Figure S11.** UV-Vis spectral response of **4s** (100  $\mu\text{M}$ , DMSO) towards  $\text{F}^-$  (0.5 mM in DMSO/ $\text{H}_2\text{O}$  (v/v 7/3)) as a function of exposure time.

**Table S5.** Cartesian coordinates of geometry optimized structure of **4s**.

| Atoms | Cartesian coordinates |                    |                    |
|-------|-----------------------|--------------------|--------------------|
| 1 n   | 9.54997186921020      | -17.57924663153041 | -20.15730795284442 |
| 2 c   | 9.28942672426034      | -18.05768499321611 | -17.65961568286206 |

|      |                   |                    |                    |
|------|-------------------|--------------------|--------------------|
| 3 c  | 9.33539266771600  | -20.69158236723568 | -16.87034758276627 |
| 4 c  | 9.16391590834480  | -21.27564797345726 | -14.24404673184330 |
| 5 c  | 8.90065006836767  | -19.24870975367521 | -12.46586123330883 |
| 6 c  | 8.78199258427475  | -16.77873135666376 | -13.21267667566615 |
| 7 c  | 8.96342031677341  | -16.07817557723723 | -15.83684510564680 |
| 8 c  | 8.87310961811985  | -13.53161216669644 | -16.76436554333382 |
| 9 c  | 9.09789423538214  | -13.15982732791385 | -19.43888951433157 |
| 10 c | 9.42265670397734  | -15.26264555914701 | -21.12177736304065 |
| 11 c | 9.50937452144650  | -22.71068032830836 | -18.62422647948858 |
| 12 c | 9.56207601810067  | -25.20047768367432 | -17.80786434086882 |
| 13 c | 9.43598025882467  | -25.77040570277283 | -15.20352487531487 |
| 14 c | 9.23087075155267  | -23.83318184854578 | -13.45262910518412 |
| 15 c | 8.57017863976910  | -11.28340908915006 | -14.99015026581731 |
| 16 c | 9.04841651799151  | -10.56929297866518 | -20.06911031490018 |
| 17 h | 8.77185458047885  | -19.71498931722476 | -10.45480375371329 |
| 18 h | 8.55530597492697  | -15.29484719699943 | -11.81458748107387 |
| 19 h | 9.56149489917596  | -22.30769796789949 | -20.64469913051578 |
| 20 h | 9.69044098626594  | -26.73019624988554 | -19.19291642114805 |
| 21 h | 9.48284120756206  | -27.73963960804390 | -14.57432377711186 |
| 22 h | 9.10746690300088  | -24.25583117487626 | -11.43187046376825 |
| 23 c | 8.97524889158499  | -12.80426771138479 | -25.21168741154283 |
| 24 c | 9.27994302502813  | -12.56013168629363 | -27.81224049192355 |
| 25 c | 10.32710437600287 | -14.56790439398477 | -29.19638935757900 |
| 26 c | 9.68721100282903  | -15.01776924408622 | -23.89448136265208 |
| 27 c | 10.68563936641889 | -17.06729346906724 | -25.35227767161351 |

|      |                   |                    |                    |
|------|-------------------|--------------------|--------------------|
| 28 c | 11.01825106770361 | -16.79224186881771 | -27.97687538068037 |
| 29 o | 11.36450501124589 | -19.27289349428588 | -24.29929916796454 |
| 30 h | 8.11828259844832  | -11.24024404210402 | -24.17166355060946 |
| 31 h | 8.69114958671990  | -10.82232517483034 | -28.76259878027936 |
| 32 h | 10.58335463683730 | -14.39956880611170 | -31.24221208404002 |
| 33 h | 11.81388055470164 | -18.38899486077599 | -29.01983437031287 |
| 34 c | 8.52317833480767  | -8.63931233980823  | -16.02278717972553 |
| 35 c | 8.77745820484510  | -8.73362090933310  | -18.59679665159326 |
| 36 o | 8.35191768534723  | -11.51084107351546 | -12.67587502808771 |
| 37 c | 8.22115548702270  | -6.45410239282567  | -14.27372410363494 |
| 38 h | 10.83546766677597 | -19.16144820994414 | -22.46584913471898 |
| 39 h | 9.77854588232125  | -6.41118307937204  | -12.88026939243045 |
| 40 h | 6.45309744381431  | -6.63606896655139  | -13.17449921204908 |
| 41 h | 8.19423582789242  | -4.65747920694014  | -15.32129830950963 |

**Table S6.** Cartesian coordinates of geometry optimized structure of **4s** with F.

| Atoms | Cartesian coordinates |                    |                    |
|-------|-----------------------|--------------------|--------------------|
| 1 n   | 9.20556179385480      | -17.14880388706549 | -20.94335612232867 |
| 2 c   | 8.95217302253863      | -17.93933110548009 | -18.53723771970571 |
| 3 c   | 8.86716495123301      | -20.66485405247724 | -18.15445529363961 |
| 4 c   | 8.46214547109820      | -21.64521026210130 | -15.67979338070157 |
| 5 c   | 8.18812114553340      | -19.90372625578453 | -13.61650102860803 |
| 6 c   | 8.33601575700649      | -17.34458447595005 | -13.95301026258689 |
| 7 c   | 8.74040297273815      | -16.25369395806720 | -16.41648252510095 |
| 8 c   | 8.96206746899418      | -13.60282700847361 | -16.92340070158949 |
| 9 c   | 9.33873388922465      | -12.87711302251704 | -19.50710793026495 |

|      |                   |                    |                    |
|------|-------------------|--------------------|--------------------|
| 10 c | 9.37594311674667  | -14.71848450672537 | -21.49964112511438 |
| 11 c | 9.20320236838760  | -22.35803244931850 | -20.20324545345162 |
| 12 c | 9.10717848406941  | -24.94875493856735 | -19.79813336118674 |
| 13 c | 8.67235884465835  | -25.92833442260473 | -17.35240314926936 |
| 14 c | 8.35949174305594  | -24.29780091060280 | -15.32313038511262 |
| 15 c | 8.86238895298701  | -11.63334017909509 | -14.83994322330012 |
| 16 c | 9.67938644107856  | -10.23901567712718 | -19.76172494515347 |
| 17 c | 8.18274852437679  | -11.88349650874032 | -25.09609723987009 |
| 18 c | 8.23668461324557  | -11.16432457927201 | -27.63250354683531 |
| 19 c | 9.73029337127760  | -12.56729062908296 | -29.32410613930026 |
| 20 c | 9.56214969815797  | -13.97676050549546 | -24.18508209525388 |
| 21 c | 11.13551927749314 | -15.41605515619471 | -25.89420642895341 |
| 22 c | 11.13015662596727 | -14.62450618934668 | -28.47612727086571 |
| 23 o | 12.55467718669803 | -17.27270982958936 | -25.15125129645504 |
| 24 c | 9.24403911330336  | -8.88864825190915  | -15.46172693976677 |
| 25 c | 9.58889628972812  | -8.63692703248570  | -18.01398466090863 |
| 26 o | 8.47188351796145  | -12.16409208974162 | -12.59448846731553 |
| 27 c | 9.15748425336868  | -6.96057031327545  | -13.40772760767202 |
| 28 h | 7.86919381915059  | -20.66754336274222 | -11.71995238647079 |
| 29 h | 8.14305287607263  | -16.08318148623071 | -12.34442118558183 |
| 30 h | 9.57269889533749  | -21.59833758690790 | -22.08966995462085 |
| 31 h | 9.37982489564314  | -26.24308503747599 | -21.38914580789428 |
| 32 h | 8.59427342463954  | -27.97453102198926 | -17.05803395344750 |
| 33 h | 8.03756705924285  | -25.04241540123622 | -13.41982807976976 |
| 34 h | 6.96373820201045  | -10.84202360396820 | -23.78875598447607 |

|      |                   |                    |                    |
|------|-------------------|--------------------|--------------------|
| 35 h | 7.11105604685271  | -9.55926753406784  | -28.29050073014938 |
| 36 h | 9.79250011162040  | -12.04727037478495 | -31.32857676844558 |
| 37 h | 12.31178108040053 | -15.71060482256741 | -29.78388137214916 |
| 38 h | 11.59791739696074 | -19.57868924255146 | -25.64216184189746 |
| 39 h | 10.49785961797164 | -7.44939023365241  | -11.88243623617550 |
| 40 h | 7.25989608298807  | -6.90765124666465  | -12.52957822694275 |
| 41 h | 9.61054152275377  | -5.06695104908931  | -14.14086779077245 |
| 42 f | 10.78436462409794 | -21.32841182139233 | -26.04676981339317 |
| 43 n | 7.05234671875387  | -19.51848401972508 | -43.37772147347339 |
| 44 c | 9.18611674065189  | -18.08370507244376 | -42.17070719706069 |
| 45 c | 5.55939587962654  | -17.76946433801409 | -45.04494234575699 |
| 46 c | 8.10503208623228  | -21.64562941532696 | -44.93826495805211 |
| 47 c | 5.35911525353117  | -20.57501767715429 | -41.35623984581529 |
| 48 h | 4.60426678230814  | -19.00131887036587 | -40.23028680877241 |
| 49 h | 6.47361871624539  | -21.84920125249823 | -40.15267831625147 |
| 50 h | 3.80886246137845  | -21.61727178165421 | -42.26407405672620 |
| 51 h | 6.52662518659619  | -22.67704979224590 | -45.80947166471496 |
| 52 h | 9.18985700862308  | -22.90870131451110 | -43.69661082820348 |
| 53 h | 9.33912718911639  | -20.84751662829169 | -46.40598626758224 |
| 54 h | 4.80241064414744  | -16.22456375969206 | -43.88116644777080 |
| 55 h | 4.00684976667954  | -18.84125401826328 | -45.91399117627599 |
| 56 h | 6.81895864980422  | -17.01221301961979 | -46.51260965033367 |
| 57 h | 8.39052657782681  | -16.53452994563551 | -41.03896619516538 |
| 58 h | 10.40856756115213 | -17.32365025110674 | -43.66814105670360 |
| 59 h | 10.26012248357353 | -19.38282473677058 | -40.95710800013284 |



**Table S7.** Cartesian coordinates of geometry optimized structure of **4u**.

| <b>Atoms</b> | <b>Cartesian coordinates</b> |                    |                    |
|--------------|------------------------------|--------------------|--------------------|
| 1 n          | 9.50514077574996             | -17.71026161083915 | -20.15880765209527 |
| 2 c          | 9.26673214274833             | -18.16643999582583 | -17.66335681823626 |
| 3 c          | 9.32430484271339             | -20.77777487937581 | -16.80756545820717 |
| 4 c          | 9.14823986200343             | -21.28727265329839 | -14.16528923693049 |
| 5 c          | 8.88664658339323             | -19.21887165728603 | -12.42852109476822 |
| 6 c          | 8.77267592947308             | -16.76640134731154 | -13.22907276262716 |
| 7 c          | 8.95359379437365             | -16.15230547744866 | -15.87001525745779 |
| 8 c          | 8.94114462946756             | -13.64160799453724 | -16.83495617512133 |
| 9 c          | 9.35316312060773             | -13.24640234274523 | -19.45772637291772 |
| 10 c         | 9.49649656898450             | -15.38398168436257 | -21.11227700630490 |
| 11 c         | 9.51949196825556             | -22.83583965442007 | -18.50854002573579 |
| 12 c         | 9.58185085510031             | -25.30317817006786 | -17.62636816200699 |
| 13 c         | 9.44266392238427             | -25.80343691241326 | -15.00905681941178 |
| 14 c         | 9.22127659844125             | -23.82299717789465 | -13.30860688027910 |
| 15 c         | 8.36660354344161             | -11.35808014145610 | -15.15076990620835 |
| 16 c         | 9.92840403941629             | -10.69360442186672 | -20.21302210825731 |
| 17 c         | 8.91398405088381             | -12.81607780236532 | -25.05104053265600 |
| 18 c         | 9.25859330923524             | -12.45713289155387 | -27.63377666176486 |
| 19 c         | 10.33015045321022            | -14.36872995165950 | -29.11941489463890 |
| 20 c         | 9.66929056904764             | -15.08478195267093 | -23.86667342448514 |
| 21 c         | 10.66610467722264            | -17.06755127134316 | -25.40449993445436 |
| 22 c         | 11.01827410971460            | -16.65078999363763 | -28.00293305829262 |
| 23 o         | 11.32355645076255            | -19.31688405273319 | -24.44048321640758 |

|       |                   |                    |                    |
|-------|-------------------|--------------------|--------------------|
| 24 c  | 9.27911199275764  | -9.03106152460894  | -16.41431136872085 |
| 25 c  | 8.86186396532310  | -8.89817330394806  | -18.81829658881705 |
| 26 o  | 7.27940919923954  | -11.46388875109551 | -13.13370366596336 |
| 27 cl | 8.27218817570254  | -9.62335463920540  | -29.04443933740578 |
| 28 h  | 8.76655796305379  | -19.64278501908112 | -10.40814411932220 |
| 29 h  | 8.54319269203319  | -15.24740567871056 | -11.86318057948403 |
| 30 h  | 9.58264291352867  | -22.48060846922560 | -20.53838253295420 |
| 31 h  | 9.72985035989340  | -26.86852031877643 | -18.96866499615755 |
| 32 h  | 9.49340860106103  | -27.75518879975629 | -14.32836428945970 |
| 33 h  | 9.09359613007204  | -24.19513653282809 | -11.27851013627145 |
| 34 h  | 7.93261580638009  | -11.35283749961070 | -23.97189097258454 |
| 35 h  | 10.58578442393215 | -14.08521892154133 | -31.14880864209191 |
| 36 h  | 11.82688092634155 | -18.17498621849714 | -29.13844875729322 |
| 37 h  | 10.79680642201717 | -19.30383486986685 | -22.61662674271322 |

**Table S8.** Cartesian coordinates of geometry optimized structure of **4u** with F<sup>-</sup>.

| Atoms | Cartesian coordinates |                    |                    |
|-------|-----------------------|--------------------|--------------------|
| 1 n   | 9.79971094883987      | -16.98321194009421 | -21.35010908386724 |
| 2 c   | 9.72335286891313      | -17.81436849076757 | -18.95561401067922 |
| 3 c   | 10.17826255770352     | -20.49724455251539 | -18.53426172420323 |
| 4 c   | 10.08042370707435     | -21.47496149636885 | -16.02672028817478 |
| 5 c   | 9.55569894181544      | -19.78179653963569 | -13.96722735538765 |
| 6 c   | 9.14784209544847      | -17.25803883305629 | -14.33946176679810 |
| 7 c   | 9.21924463612863      | -16.18057231468538 | -16.83652955317933 |
| 8 c   | 8.90205831963991      | -13.56921997078083 | -17.37469511621308 |
| 9 c   | 9.21985497848518      | -12.73395623831172 | -19.90819181695180 |

|       |                   |                    |                    |
|-------|-------------------|--------------------|--------------------|
| 10 c  | 9.53697407471434  | -14.55392460870856 | -21.89696126839192 |
| 11 c  | 10.71982388254394 | -22.14319761717299 | -20.57334937824578 |
| 12 c  | 11.14615623563657 | -24.69383480144542 | -20.12611096261826 |
| 13 c  | 11.04237054713577 | -25.67438609996525 | -17.64583358379883 |
| 14 c  | 10.51740441809945 | -24.08608160878563 | -15.62652574213236 |
| 15 c  | 8.09899318121890  | -11.66396469896762 | -15.35949110237626 |
| 16 c  | 9.41913481600069  | -10.04535615730453 | -20.32626201470023 |
| 17 c  | 7.91697847090549  | -11.66137933746545 | -25.20635762053628 |
| 18 c  | 7.90595260071654  | -10.67790816464985 | -27.64637184161505 |
| 19 c  | 9.49370902498020  | -11.71417617200815 | -29.49695439314468 |
| 20 c  | 9.50595898812453  | -13.70406699179031 | -24.53812674397828 |
| 21 c  | 11.15994650112150 | -14.83256567479152 | -26.41142538213953 |
| 22 c  | 11.06422831747024 | -13.72620766445861 | -28.87599510417434 |
| 23 o  | 12.71911276041537 | -16.63836481297540 | -25.91759716214321 |
| 24 c  | 8.67060554001281  | -9.04446419815253  | -16.22195658730081 |
| 25 c  | 8.20599716910588  | -8.68121725376866  | -18.59095403848652 |
| 26 o  | 7.07864866461547  | -12.21352519115939 | -13.37608139306402 |
| 27 cl | 5.84259122841971  | -8.18146393857111  | -28.42655760208380 |
| 28 h  | 9.49504517009810  | -20.55645586044789 | -12.05001160565459 |
| 29 h  | 8.75263219335792  | -16.03202052528846 | -12.73615887822904 |
| 30 h  | 10.79899574111725 | -21.37764141741652 | -22.49158909671217 |
| 31 h  | 11.56700807483875 | -25.95467219713086 | -21.71139775212912 |
| 32 h  | 11.37834007207762 | -27.68878097534003 | -17.31716671061928 |
| 33 h  | 10.43832554954262 | -24.83260475327166 | -13.69895460256208 |
| 34 h  | 6.54898125426558  | -10.93207962055395 | -23.83815641296725 |

|      |                   |                    |                    |
|------|-------------------|--------------------|--------------------|
| 35 h | 9.47206676509300  | -10.94670148706505 | -31.41682842603243 |
| 36 h | 12.32855432645488 | -14.53947153776186 | -30.29696332918883 |
| 37 h | 11.85998090578140 | -19.07894422379897 | -26.20708018158905 |
| 38 f | 11.20629296598200 | -20.88276895652986 | -26.50714421388057 |
| 39 n | 15.17242429356049 | -15.20460937368791 | -38.09342055919366 |
| 40 c | 15.48405044279240 | -13.86122631376034 | -35.61156108989780 |
| 41 c | 15.02689199669863 | -13.29491727195365 | -40.19196983647819 |
| 42 c | 17.39574040340679 | -16.92036112795960 | -38.52502384674649 |
| 43 c | 12.78496775830361 | -16.74316942660015 | -38.04468322173987 |
| 44 h | 12.58040981104549 | -17.71490591650063 | -39.86879594256348 |
| 45 h | 11.17513820477071 | -15.46817928389999 | -37.73164058246183 |
| 46 h | 12.91771137454724 | -18.13239437627046 | -36.50626416633516 |
| 47 h | 17.47959229017735 | -18.30352320178946 | -36.97771175134688 |
| 48 h | 17.14293515054953 | -17.89063002171477 | -40.34385447768022 |
| 49 h | 19.12598613777755 | -15.77184614313537 | -38.55697045596778 |
| 50 h | 14.79951992937985 | -14.30301443738166 | -41.99363777595072 |
| 51 h | 16.78293505130516 | -12.18598520618451 | -40.20530424478367 |
| 52 h | 13.39599438588674 | -12.05444632867643 | -39.85170665768003 |
| 53 h | 13.85265727466974 | -12.60747390921755 | -35.32315473995585 |
| 54 h | 17.23385710338471 | -12.74389762075911 | -35.66884709438902 |
| 55 h | 15.59233617276048 | -15.27794079136166 | -34.09600008098064 |

### **Reversibility of the sensory probes and proposition of logic circuitry**

As discussed in the main text, initially in absence of any input (*i.e.*, both IN 1 and IN 2 are 0) the chemosensor, **4u** was pale yellow colored and the absorbance of **4u** at 460 nm is below the threshold value, which will keep OUT 1 in *OFF* state. However, in presence of F<sup>-</sup> (*i.e.* IN 1 is 1),

the color of the chemosensor changed to orange, which led to the generation of new peak at 460 nm. Therefore OUT 1 will be in the *ON* state. The presence of  $H^+$  (*i.e* IN 2 is 1) in **4u** could not induce any subtle variation in the spectral behaviour. So, OUT 1 would be remained in *OFF* state. The sequential addition of  $F^-$  and  $H^+$ , the inherent spectral behaviour of **4u** was reverted back. Thus, the absorbance at 460 nm would be again below the threshold value, which led the OUT Y1 to stay in *OFF* state. The corresponding spectral outcomes have been shown in **Figure 4b, c** which is useful for INHIBIT logic circuit formulation.

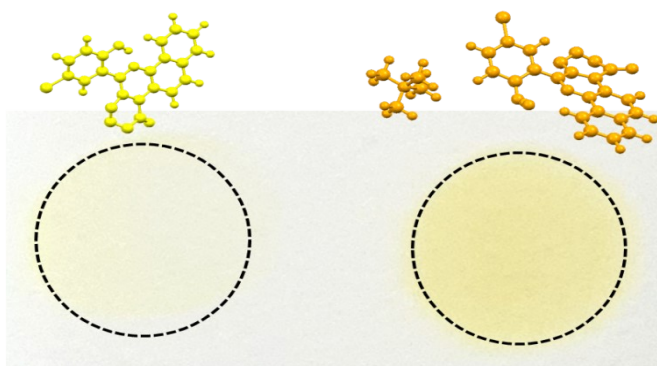

**Figure S12.** Naked eye solid state chromogenic recognition of  $F^-$  by **4u** (left: only **4u**, right: **4u** in presence of  $F^-$ ).

## References

- S1. V. V. Kumar, D. Ramadevi, V. M. Ankathi, T. K. Pradhan, K. Basavaiah, *Microchem. J.* **2020**, *157*, 105028.
- S2. D. Thongkum, T. Tuntulani, *Tetrahedron* **2011**, *67*, 8102–8109.
- S3. S. P. Mahanta, R. Das, S. P. Bharati, A. Borborah, P. J. Sarma, B. Das, S. Choudhury, G. Chakraborty, *New J. Chem.* **2018**, *42*, 3758–3764.
- S4. Madhuprasad, D. R. Trivedi, *ChemPlusChem* **2014**, *79*, 1001–1008.
- S5. D. Morales-Morales, A. Dorazco-Gonzalez, M. A. Garcia, J. J. Guerra-Garcia, M. K. Salomón-Flores, I. J. Bazany-Rodríguez, D. Martínez-Otero, *Dalton Trans.* **2017**, *46*, 4950–4959.
- S6. A. K. Purohit, S. K. Padhan, J. R. Mohanty, P. K. Kar, *Photochem. Photobiol. Sci.* **2018**, *17*, 815–821.
- S7. S. Kainth, N. Goel, S. Basu, B. Maity, *New J. Chem.* **2022**, *46*, 686–694.

S8. X. Yu, L. Yang, T. Zhao, R. Zhang, L. Yang, C. Jiang, J. Zhao, B. Liu, Z. Zhang, *RSC Adv.* **2017**, *7*, 53379–53384.

S9. S. P. Mahanta, R. Das, P. J. Sarma, A. Borborah, S. P. Bharati, *New J. Chem.* **2019**, *43*, 3447–3453.
